# Supplementary material for: Waning habitats due to climate change: the effects of changes in streamflow and temperature at the rear edge of the distribution of a cold-water fish
Source: Copernicus journal article supplement (doi:10.5194/hess-21-4073-2017), 2017-08-14
Supplement: Supplementary file 1 [file hess-21-4073-2017-supplement.zip]

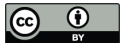

## *Supplement of*

# **Waning habitats due to climate change: the effects of changes in streamflow and temperature at the rear edge of the distribution of a cold-water fish**

**José María Santiago et al.**

*Correspondence to:* José María Santiago ([jmsant@picos.com](mailto:jmsant@picos.com))

- [hess-21-4073-2017-supplement-title-page.pdf](#)
- [Santiago\\_SM01\\_FigS1-S24 .pdf](#)
- [Santiago\\_SM02\\_DatasetS1.xlsx](#)
- [Santiago\\_SM03\\_TableS1 .pdf](#)
- [Santiago\\_SM04\\_DatasetS2.xlsx](#)
- [Santiago\\_SM05\\_DatasetS3.xlsx](#)

The copyright of individual parts of the supplement might differ from the CC BY 3.0 License.
