# Supplementary material for: Waning habitats due to climate change: the effects of changes in streamflow and temperature at the rear edge of the distribution of a cold-water fish
Source: Copernicus journal article supplement (doi:10.5194/hess-21-4073-2017), 2017-08-14
Supplement: Supplementary file 4 [file hess-21-4073-2017-supplement.zip]

Archive with 6 entries (6 files):
- hess-21-4073-2017-supplement-title-page.pdf
- Santiago_SM01_FigS1-S24 .pdf
- Santiago_SM04_DatasetS2.xlsx
- Santiago_SM02_DatasetS1.xlsx
- Santiago_SM03_TableS1 .pdf
- Santiago_SM05_DatasetS3.xlsx
