# Supplementary material for: Waning habitats due to climate change: the effects of changes in streamflow and temperature at the rear edge of the distribution of a cold-water fish
Source: Copernicus journal article supplement (doi:10.5194/hess-21-4073-2017), 2017-08-14
Supplement: Supplementary file 4 [file hess-21-4073-2017-supplement.zip › Santiago_SM04_DatasetS2.xlsx]

## Sheet: Dataset S2. Qmean ensemble
Dataset S2. Climate change predictions (daily mean streamflow [Qmean]) per gauging station and scenario. Ensemble of nine climate models. Unit: m3/s. Q=0-days is the sum of the models in which Qmean=0.
Gauging station (code)	2006	2006	2006	2006	2016	2016	2016	2016	2057	2057	2057	2057	2085	2085	2085	2085	2714	2714	2714	2714	3001	3001	3001	3001	3002	3002	3002	3002	3030	3030	3030	3030	3268	3268	3268	3268	8104	8104	8104	8104
VARIABLE AND SCENARIO	Qmean RCP4.5	Qmean RCP8.5	days Q=0 RCP4.5	days Q=0 RCP8.5	Qmean RCP4.5	Qmean RCP8.5	days Q=0 RCP4.5	days Q=0 RCP8.5	Qmean RCP4.5	Qmean RCP8.5	days Q=0 RCP4.5	days Q=0 RCP8.5	Qmean RCP4.5	Qmean RCP8.5	days Q=0 RCP4.5	days Q=0 RCP8.5	Qmean RCP4.5	Qmean RCP8.5	days Q=0 RCP4.5	days Q=0 RCP8.5	Qmean RCP4.5	Qmean RCP8.5	days Q=0 RCP4.5	days Q=0 RCP8.5	Qmean RCP4.5	Qmean RCP8.5	days Q=0 RCP4.5	days Q=0 RCP8.5	Qmean RCP4.5	Qmean RCP8.5	days Q=0 RCP4.5	days Q=0 RCP8.5	Qmean RCP4.5	Qmean RCP8.5	days Q=0 RCP4.5	days Q=0 RCP8.5	Qmean RCP4.5	Qmean RCP8.5	days Q=0 RCP4.5	days Q=0 RCP8.5
1/1/2015	0.999775	1.50405	0	0	10.0477	9.39572	0	0	5.51717	3.28809	0	0	31.9042	45.2551	1	0	4.49495	3.56198	0	0	9.65437	11.7621	0	0	0.78718	0.73834	0	0	2.27943	2.01368	0	0	1.60064	1.09243	1	0	1.11806	1.0442	0	0
2/1/2015	1.37319	1.62448	1	0	8.71603	9.06735	0	0	5.4638	3.81992	0	0	38.4379	53.4195	1	0	5.28733	2.60497	0	0	7.97499	9.57961	0	0	0.747378	0.735331	0	0	2.01328	2.12386	0	0	1.17622	1.31389	0	0	1.10062	1.02607	0	0
3/1/2015	1.28704	1.5022	1	1	8.44185	7.31478	0	0	5.55511	3.27638	0	0	33.787	43.6728	1	0	4.74468	3.30066	0	0	10.1956	10.6425	0	0	0.790289	0.718706	0	0	1.84395	2.4733	0	0	1.44352	0.916229	0	0	1.08291	1.1258	0	0
4/1/2015	1.71801	1.74877	1	0	9.36076	7.90103	0	0	6.35573	3.73517	0	0	42.949	44.5569	0	0	4.72352	3.41061	0	0	10.415	9.41307	0	0	0.802828	0.721781	0	0	1.90407	2.08587	0	0	1.59201	0.801487	0	0	1.04367	1.07688	0	0
5/1/2015	2.53314	1.496	1	0	9.72362	7.32621	0	0	5.86186	3.63433	0	0	37.0299	36.404	0	0	5.39588	3.58801	0	0	8.79197	7.89258	0	0	0.805305	0.711566	0	0	1.70075	2.24991	0	0	1.5948	0.990225	0	1	1.12669	1.10644	0	0
6/1/2015	2.57027	1.79532	0	0	7.84456	7.01713	0	0	5.64795	3.40899	0	0	37.4554	37.284	0	0	5.05508	3.90321	0	0	10.4461	8.29093	0	0	0.804272	0.708852	0	0	1.60201	2.15736	0	0	1.38424	0.984353	0	1	1.17793	1.11041	0	0
7/1/2015	1.41909	1.94662	0	0	9.49939	5.99086	0	0	5.78321	2.98742	0	0	35.1759	36.8262	0	0	4.34284	3.91267	0	0	11.7793	6.55824	0	0	0.790227	0.726991	0	0	1.49318	2.20193	0	0	1.72977	0.781766	0	1	1.18347	1.07687	0	0
8/1/2015	1.94459	2.36586	0	0	9.12352	6.21356	0	0	5.64897	3.0068	0	0	42.1545	29.2079	0	0	4.79099	4.33771	0	0	11.6736	6.36131	1	0	0.787891	0.739198	0	0	1.56852	2.25774	1	0	2.26039	0.787132	0	1	1.17011	1.03659	0	0
9/1/2015	1.72131	1.52877	0	0	8.07231	5.12508	0	0	5.62219	3.21538	0	0	34.6367	33.4316	0	0	5.38724	3.97127	0	0	11.0437	6.35886	0	0	0.795823	0.725174	0	0	1.76326	1.77698	0	0	2.22184	0.844872	0	0	1.20118	1.09519	0	0
10/1/2015	2.00881	1.23267	0	0	10.4372	5.39262	0	0	5.24889	2.72092	0	0	33.5842	33.1886	0	0	6.18339	3.85484	0	0	9.21045	8.39482	0	0	0.793849	0.716776	0	0	2.18726	1.7691	0	0	2.43022	0.992804	0	0	1.20292	1.10512	0	0
11/1/2015	1.75499	1.02251	0	0	10.6463	5.64442	0	0	5.40314	2.69637	0	0	31.9958	32.4127	0	0	6.08521	3.8433	0	0	7.37766	9.32383	1	0	0.804379	0.717479	0	0	2.5334	1.76191	0	0	1.84065	0.890442	0	0	1.13852	1.11239	0	0
12/1/2015	1.34502	1.04123	0	0	9.38119	4.98705	0	0	4.77982	2.98287	0	0	34.7474	32.8434	0	0	5.87638	3.78773	0	0	6.97451	11.3994	0	0	0.80966	0.719085	0	0	2.54757	1.78347	0	0	2.32104	1.19588	0	0	1.1267	1.07767	0	0
13/1/2015	1.30935	1.06976	0	0	10.5518	5.66808	0	0	4.92278	2.93038	0	0	24.4591	35.5084	0	0	5.83072	4.45877	0	0	10.5056	11.7204	1	0	0.814953	0.733129	0	0	2.33804	2.10781	0	0	2.51117	1.44098	0	0	1.13137	1.10112	0	0
14/1/2015	1.56951	1.18774	1	0	11.8484	6.39796	0	0	4.75324	2.64632	0	0	22.6417	36.0813	0	0	5.6757	4.77872	0	0	8.98592	9.30561	0	0	0.798802	0.746275	0	0	2.55743	1.82987	0	0	2.137	1.91078	0	0	1.10908	1.13658	0	0
15/1/2015	1.22573	1.57292	0	0	11.5811	6.24367	0	0	4.72429	2.86916	1	1	24.8812	34.0628	1	0	5.89495	5.78332	0	0	10.401	9.35694	0	0	0.798239	0.756913	0	0	2.61739	1.70255	0	0	1.61683	1.92839	0	0	1.08938	1.10781	0	0
16/1/2015	1.21532	1.62119	0	0	9.7345	6.87993	0	0	4.70354	3.42937	1	0	23.8707	34.2233	1	0	6.2298	5.22865	0	0	15.2064	9.79844	0	0	0.791844	0.750502	0	0	2.3041	1.82155	0	0	1.97264	1.14974	0	1	1.14582	1.10592	0	0
17/1/2015	1.18936	1.86733	0	0	9.22849	6.92669	0	0	3.72322	2.67675	0	1	22.2688	35.9087	1	0	5.87986	5.00473	0	0	13.5126	16.4793	0	0	0.783628	0.748967	0	0	1.80459	1.66128	1	0	1.91618	0.859246	0	1	1.15696	1.14104	0	0
18/1/2015	1.41013	2.36288	0	0	9.99246	7.15235	0	0	3.15629	2.34371	1	1	15.9149	33.4888	0	1	6.72543	4.55032	0	0	17.8064	16.4005	0	0	0.776491	0.744128	0	0	2.08178	1.50839	1	0	1.89281	1.28311	0	0	1.29818	1.13527	0	0
19/1/2015	1.45817	1.42309	0	0	11.4888	7.07204	0	0	3.05504	2.13462	1	1	23.9199	25.0406	0	1	6.20488	4.3519	0	0	9.61849	14.5421	1	0	0.781934	0.820055	0	0	1.81558	1.63504	1	0	1.44724	1.48957	0	0	1.14633	1.15265	0	0
20/1/2015	1.7509	1.27309	0	0	11.4438	7.0806	0	1	2.85815	2.71145	1	1	19.4482	23.3693	0	2	6.08888	4.42976	0	0	10.6769	6.32323	0	1	0.782025	0.810705	0	0	1.54625	2.06785	1	0	2.18777	1.14353	0	0	1.17784	1.1752	0	0
21/1/2015	1.7249	1.21447	0	0	10.7373	4.50173	0	0	3.37729	1.92604	1	0	18.6247	18.1093	0	1	6.77445	4.36847	0	0	12.8857	5.53844	1	0	0.802484	0.828695	0	0	1.54056	2.23203	0	0	2.06824	1.97723	0	0	1.1593	1.03002	0	0
22/1/2015	1.21872	1.97508	1	0	11.2853	5.36674	0	0	3.1943	1.76851	2	1	26.8746	33.2407	0	0	6.24625	4.85236	0	0	11.8717	8.3589	1	0	0.819291	0.821998	0	0	1.47938	2.29845	1	0	2.00126	1.29508	0	1	1.17081	1.17834	0	0
23/1/2015	1.14843	1.59522	1	0	11.1629	6.09637	0	1	3.41511	2.24168	1	0	25.9968	34.4649	1	0	5.17518	4.75436	0	0	7.28862	7.85149	0	0	0.822434	0.844303	0	0	1.63376	2.39292	1	0	1.98367	0.973739	0	1	1.18509	1.12578	0	0
24/1/2015	1.22582	1.25112	1	0	9.58354	6.34583	0	0	3.40141	2.19827	0	0	25.1184	35.911	0	0	5.06175	5.14647	0	0	10.194	7.32201	0	0	0.815004	0.850242	0	0	1.57204	2.41624	2	0	2.14426	1.00428	0	0	1.00328	1.09394	0	0
25/1/2015	1.57197	1.52396	0	0	9.82543	6.31363	0	0	3.6268	2.2864	0	1	26.033	27.3772	0	2	5.30023	4.83582	0	0	10.2136	10.2812	0	0	0.81625	0.864863	0	0	1.1622	2.39668	1	0	1.84872	1.44775	0	0	1.02571	1.07602	0	0
26/1/2015	1.62709	1.34069	0	0	9.60183	5.47973	0	0	3.37825	2.05097	0	1	23.7034	28.5201	0	1	5.43139	4.98572	0	0	9.01243	10.1125	0	0	0.810875	0.872148	0	0	0.985708	2.1965	1	0	1.96476	1.6689	0	0	0.99357	1.32998	0	0
27/1/2015	1.42811	0.630498	0	0	7.67566	5.29627	0	0	3.71673	2.56838	0	1	19.4351	22.9955	0	1	5.4322	4.63478	0	0	7.60621	10.0957	0	0	0.82052	0.860023	0	0	1.06718	2.52136	0	0	1.65043	1.19736	0	0	0.970962	1.33405	0	0
28/1/2015	1.73089	0.715623	0	0	9.29981	6.02634	0	0	4.48287	2.81221	0	1	13.2033	8.07081	2	1	4.98594	4.35699	0	0	8.13729	7.98138	1	0	0.840542	0.855102	0	0	1.19064	2.27025	0	0	1.6594	1.49002	0	0	1.09423	1.03243	0	0
29/1/2015	2.73701	1.17806	0	0	9.53439	5.72636	0	0	4.94756	3.08026	0	2	10.9039	10.6962	2	1	5.05751	4.42997	0	0	10.1026	7.90703	0	0	0.845061	0.85144	0	0	1.29943	2.34547	0	0	1.7522	1.43702	0	0	1.00965	1.03494	0	0
30/1/2015	4.01078	0.93375	0	0	8.74968	5.39912	0	0	5.30775	2.83339	0	2	28.4467	5.03074	0	0	4.40423	4.60362	0	0	7.0624	5.93109	0	0	0.849417	0.842517	0	0	1.79851	1.97118	0	0	1.48766	1.39984	0	0	0.979081	1.10735	0	0
31/1/2015	4.72732	0.895612	0	0	11.0387	6.14787	0	0	5.25868	2.43293	0	3	11.4129	7.87889	2	1	4.77555	4.32803	0	0	7.94013	4.5476	0	0	0.864305	0.833743	0	0	1.92416	1.80032	1	0	1.0767	1.00351	0	0	0.990725	1.08806	0	0
1/2/2015	1.64116	1.40594	0	0	7.95104	5.69686	0	0	6.41108	2.67482	0	2	14.579	14.6489	1	0	4.53133	4.39882	0	0	4.3903	6.11351	0	0	0.870199	0.824085	0	0	2.15173	1.74582	0	0	1.48128	0.837355	0	0	0.961257	1.14175	0	0
2/2/2015	2.09166	1.24328	0	0	9.21342	6.26984	0	0	6.0735	2.57082	1	1	26.0936	5.91121	1	2	4.89966	4.7458	0	0	4.40772	8.95158	0	0	0.882404	0.835745	0	0	2.19279	1.71609	0	0	1.50623	0.781868	0	0	0.884709	1.17178	0	0
3/2/2015	2.75653	0.914885	0	0	9.2744	6.29783	0	0	6.43767	3.96792	1	0	16.2508	5.21233	1	2	4.81026	4.78148	0	0	11.7201	9.20786	0	0	0.901979	0.844408	0	0	2.23655	1.82223	0	0	0.993243	0.609762	0	0	0.867246	1.16009	0	0
4/2/2015	1.43145	0.894451	0	0	8.56214	7.1064	0	0	6.95605	3.74805	0	0	15.3296	6.11733	1	2	4.86983	4.94719	0	0	10.3091	9.44306	0	0	0.92263	0.855518	0	0	2.11039	1.57792	0	0	1.21274	0.739456	0	0	0.851839	1.104	0	0
5/2/2015	1.68134	0.868788	0	0	9.95504	6.28109	0	1	6.4049	3.83961	0	0	18.0295	9.08618	1	1	4.70868	5.17875	0	0	19.3571	9.94213	0	0	0.932758	0.851874	0	0	2.27599	1.3128	0	0	1.36089	0.851237	0	0	0.865468	1.17517	0	0
6/2/2015	0.889761	1.52362	0	0	9.63045	5.76501	0	1	6.17316	3.25591	0	0	15.1571	19.3285	2	1	5.25917	5.0881	0	0	16.2917	6.38628	0	0	0.945215	0.836297	0	0	1.88755	1.9602	0	0	1.23536	1.53609	0	0	0.900603	1.10543	0	0
7/2/2015	1.49668	1.16197	0	0	10.2509	5.07033	0	0	7.18077	3.74572	0	0	13.4269	15.2882	2	0	5.10301	4.4965	0	0	17.5625	6.69142	0	0	0.96192	0.832471	0	0	1.94788	2.09321	0	1	1.41234	1.6394	0	0	0.996511	1.0861	0	0
8/2/2015	2.55356	1.1569	0	0	12.9716	4.91817	0	0	6.42722	3.11796	2	0	27.0146	13.5191	3	0	4.75312	4.47744	0	0	16.9985	7.91078	0	0	0.968905	0.834443	0	0	1.93321	1.50337	0	1	1.69708	0.970806	0	0	0.990822	1.0534	0	0
9/2/2015	1.50127	0.986793	0	0	9.98513	6.64203	0	0	6.25547	3.53164	2	0	17.9792	12.4656	2	0	5.9164	4.35788	0	0	13.5323	8.40129	0	0	0.9724	0.842768	0	0	2.06809	2.29665	0	0	1.42885	0.946123	0	0	1.02361	1.09186	0	0
10/2/2015	1.43719	1.06912	0	0	12.0944	6.50501	0	0	3.71471	2.8714	1	0	13.6274	12.5818	2	0	6.93829	4.78628	0	0	13.6687	8.55344	0	0	0.961667	0.862278	0	0	1.71187	2.19241	0	0	1.36904	0.831497	0	0	0.993333	1.12489	0	0
11/2/2015	1.33095	1.58166	0	0	13.1141	6.24965	0	0	4.41112	3.46612	1	0	15.4092	22.4559	2	0	6.62061	5.11795	0	0	11.5676	10.2528	0	0	0.960252	0.867178	0	0	1.56899	1.79977	0	0	1.42042	0.822832	0	0	1.02155	1.03276	0	0
12/2/2015	1.70522	0.939154	0	0	11.6096	5.54921	0	0	3.35154	3.99109	0	0	15.5993	20.4162	2	0	6.59889	5.27159	0	0	11.9255	9.39698	0	0	0.953045	0.850062	0	0	1.59793	1.61513	0	0	1.37065	0.803233	0	0	0.951291	1.04945	0	0
13/2/2015	1.40435	1.08538	0	0	10.9931	5.75764	0	0	4.0875	4.61166	0	1	18.0749	17.2584	2	0	6.19688	4.29949	0	0	14.968	10.3776	0	0	0.972411	0.876941	0	0	1.65735	1.4151	0	0	1.82516	0.758942	0	1	1.01402	1.0523	0	0
14/2/2015	1.97554	1.83532	0	0	12.484	6.12299	0	0	3.20465	4.98958	0	0	18.4358	28.4159	2	2	6.06582	4.44159	0	0	15.4503	8.15314	0	0	0.982756	0.859962	0	0	1.33089	1.55406	0	0	1.52784	1.18529	0	0	0.980537	1.08895	0	0
15/2/2015	2.01737	1.80929	0	0	13.4953	5.70798	0	1	3.35204	4.60562	0	0	21.3112	31.2535	0	2	6.31725	4.8857	0	0	16.076	6.55889	0	0	0.986535	0.869583	0	0	2.04332	1.38193	0	0	1.2859	0.877462	0	0	1.01738	1.2088	0	0
16/2/2015	1.90792	1.00126	0	0	14.9026	6.04063	0	1	3.05881	3.59961	0	0	30.6391	29.5911	2	0	6.16399	4.77904	0	0	23.6526	6.41062	0	0	1.02518	0.885614	0	0	2.09065	1.27532	0	1	1.63663	0.97055	0	0	1.0149	1.22895	0	0
17/2/2015	4.25246	1.21048	0	0	14.7393	7.70063	0	0	3.93611	3.47754	0	0	44.0482	26.5584	1	1	6.32964	4.81502	0	0	20.7656	5.95576	0	0	1.03982	0.886734	0	0	3.62525	1.26357	1	0	1.63372	0.797293	0	0	1.14344	1.15694	0	0
18/2/2015	3.43987	1.37116	0	0	14.3582	8.62549	0	0	4.63982	4.24879	0	0	23.4021	27.4994	1	1	6.30515	4.58374	0	0	15.9802	6.84536	0	0	1.03472	0.888983	0	0	2.91179	1.54517	1	0	2.00092	0.925972	0	0	1.16903	1.16254	0	0
19/2/2015	4.32845	1.28029	0	0	16.6868	8.40634	0	0	4.0471	4.03226	0	0	37.5502	27.9095	1	1	5.74177	4.56985	0	0	16.5904	6.99116	0	1	1.06402	0.911205	0	0	2.92719	1.49599	1	0	1.9481	1.19802	0	0	1.16898	1.0421	0	0
20/2/2015	1.97174	1.15362	0	0	16.3936	8.23417	0	0	3.82923	3.41822	0	0	36.7863	27.6032	1	2	5.73973	5.02594	0	0	14.2598	7.87583	0	0	1.07255	0.933719	0	0	2.65768	1.75599	1	0	1.45062	1.26742	0	0	1.1776	1.07327	0	0
21/2/2015	2.91177	1.19432	0	0	10.8289	6.36781	0	0	3.97174	4.58489	0	0	37.2116	33.5234	1	1	4.46675	5.36748	0	0	13.3594	7.859	0	0	1.06758	0.934072	0	0	2.77841	1.61283	0	0	1.47005	1.32261	0	0	1.24495	1.05106	0	0
22/2/2015	2.5932	1.23535	1	0	13.0799	7.06072	0	1	3.11429	4.52206	0	0	39.7148	32.5617	0	1	5.23253	5.43845	0	0	13.0661	7.50945	0	0	1.0712	0.962398	0	0	2.90956	1.6464	0	0	1.5177	2.13409	0	0	1.33028	0.995818	0	0
23/2/2015	2.30175	1.69843	0	0	12.4455	7.21791	0	1	4.17915	3.31747	0	0	34.6825	33.4345	2	2	5.57723	5.6993	0	0	15.8636	5.54216	0	0	1.08058	0.97345	0	0	3.77941	1.65901	0	0	1.64678	2.04951	0	0	1.49783	1.08132	0	0
24/2/2015	2.30314	1.61367	0	0	10.3076	6.85159	0	1	6.1044	4.19368	0	0	42.2442	35.3474	0	1	5.68059	6.42225	0	0	14.196	4.78985	0	0	1.08844	0.980011	0	0	3.44521	1.73998	0	0	1.53021	1.3647	0	0	1.27238	1.08496	0	0
25/2/2015	2.11311	1.7075	0	0	10.4139	6.29051	0	0	7.43081	4.14952	0	0	34.3539	29.3061	0	1	6.22751	6.66231	0	0	11.9427	6.0116	0	0	1.09852	0.995186	0	0	3.49311	1.64955	0	0	1.71196	1.07004	0	0	1.27806	1.15352	0	0
26/2/2015	1.89864	0.910755	0	0	11.3863	7.82841	0	0	6.22922	4.05365	0	0	26.4701	26.4098	1	1	5.068	6.73388	0	0	10.6263	9.6532	0	0	1.08628	1.02066	0	0	3.84673	1.61228	0	0	2.81219	1.04356	0	0	1.27832	1.03659	0	0
27/2/2015	1.84261	1.04845	0	0	10.2598	10.5829	0	0	5.87372	3.37534	0	0	29.3322	23.3483	0	1	5.24616	5.97983	0	0	11.4745	10.3043	2	0	1.07971	1.03616	0	0	3.48518	1.71098	0	0	2.52865	1.11928	0	0	1.19185	1.13866	0	0
28/2/2015	2.33278	0.974035	0	0	8.62513	10.0229	0	0	5.78238	3.54154	0	0	28.8024	29.633	0	1	4.48044	7.35519	1	0	3.94782	10.569	1	0	1.09028	1.05519	0	0	3.60527	2.24428	0	0	2.40345	1.24858	0	0	1.15745	1.1745	0	0
1/3/2015	2.20475	1.26441	1	0	8.97568	9.37603	0	1	5.86378	3.68245	0	0	25.3618	31.446	0	1	7.10039	7.82408	0	0	4.68789	10.983	0	0	1.11017	1.07424	0	0	3.5816	2.09332	0	0	1.64478	1.72316	0	0	1.10408	1.25678	0	0
2/3/2015	2.44944	2.36734	0	0	8.40361	11.1126	0	0	5.27264	3.8686	0	1	24.819	45.9405	0	0	6.59749	7.44675	0	0	9.6157	9.30356	0	0	1.11137	1.08294	0	0	3.31818	2.49475	0	0	1.58971	1.32103	0	0	1.07821	1.22571	0	0
3/3/2015	2.61762	3.09649	0	0	7.14243	9.20137	0	0	6.94259	3.73367	0	1	22.791	34.6597	0	0	7.58612	7.79682	0	0	11.3951	7.5023	0	1	1.11724	1.09531	0	0	3.05888	2.31884	0	0	1.73923	1.58248	0	0	1.15477	1.22672	0	0
4/3/2015	2.27372	2.97984	0	0	9.01676	7.85567	0	0	6.79739	4.45801	0	0	24.7138	28.3126	0	0	6.9578	6.61794	0	0	11.9022	7.00789	1	1	1.10017	1.10674	0	0	2.51039	2.08434	0	0	1.25914	1.67753	0	0	1.22762	1.24251	0	0
5/3/2015	2.28055	1.81703	0	0	10.0137	8.16486	0	0	6.11894	4.92002	0	0	22.6762	22.4549	0	1	6.82646	6.23003	0	0	5.77409	4.41432	0	0	1.07785	1.11278	0	0	1.79828	2.19253	0	0	1.60714	1.40921	0	0	1.14946	1.25763	0	0
6/3/2015	2.13779	2.65488	0	0	8.13867	9.17195	0	0	5.80909	4.87149	0	0	25.1599	25.1803	0	1	6.05383	6.16533	0	0	5.48977	4.57876	0	0	1.05977	1.11462	0	0	1.80255	2.29765	0	0	1.51481	1.45784	0	0	1.16406	1.22751	0	0
7/3/2015	2.01117	1.73863	0	0	8.46775	8.0071	0	0	5.35376	5.09135	0	0	26.2144	22.3795	0	0	6.53664	6.55614	0	0	6.36659	5.53966	1	0	1.07065	1.13072	0	0	1.92387	2.37477	1	0	1.17531	1.55479	0	0	1.22171	1.21482	0	0
8/3/2015	2.11508	1.76769	0	0	8.85293	8.46083	0	0	5.80683	5.65192	0	0	32.4434	18.4471	0	1	6.60321	6.17086	0	0	6.76719	5.52286	0	0	1.06565	1.14123	0	0	2.19005	2.26086	1	0	1.19824	1.35853	0	0	1.14046	1.19755	0	0
9/3/2015	2.624	1.79652	0	0	7.06424	7.17093	0	0	6.17376	5.44135	0	0	30.3881	19.6942	0	1	6.69677	6.4024	0	0	6.17757	5.11039	1	0	1.0615	1.1545	0	0	2.38643	1.99983	0	0	1.06794	1.71023	0	0	1.24731	1.17791	0	0
10/3/2015	3.6429	1.95517	0	0	11.822	6.03295	0	0	6.45483	5.43892	0	1	28.5761	24.8673	1	1	7.08794	6.91454	0	0	7.1268	9.19795	1	0	1.0461	1.15433	0	0	2.67047	2.24939	0	0	1.03664	1.90067	0	0	1.22819	1.13448	0	0
11/3/2015	2.11731	2.17028	0	0	12.6888	6.3906	0	0	7.9465	7.52971	0	0	24.2829	26.7595	1	1	7.19837	7.05596	0	0	5.90451	7.19711	1	0	1.04403	1.15982	0	0	2.12638	2.24609	0	0	1.51413	1.81542	0	0	1.22882	1.18314	0	0
12/3/2015	2.6861	2.03895	0	0	6.97381	6.69488	0	0	8.08523	7.72588	0	0	43.068	23.0129	1	2	6.66291	7.13998	0	0	6.91584	4.62212	1	0	1.05847	1.15276	0	0	2.1407	1.90845	0	1	1.31222	1.63542	0	0	1.1092	1.20315	0	0
13/3/2015	2.02677	1.82015	0	0	5.86526	6.99193	0	0	7.959	8.03156	0	0	34.1334	13.5955	1	1	6.23372	8.3416	0	0	5.86115	5.91046	1	0	1.07558	1.16281	0	0	2.12128	2.00513	0	0	1.32004	1.29813	0	0	1.17216	1.14265	0	0
14/3/2015	2.49657	4.05798	0	0	5.69622	6.1186	0	0	6.78268	7.37392	0	0	40.9687	16.163	1	1	6.66114	7.53459	0	0	10.5871	5.29504	0	0	1.09014	1.14412	0	0	2.15049	1.79669	0	1	1.27486	1.42505	0	0	1.14816	1.15293	0	0
15/3/2015	2.32827	2.03427	1	0	11.9743	6.50902	0	0	7.12735	6.84048	0	0	43.0597	14.9723	1	2	5.89874	7.68538	0	0	13.8209	5.28699	0	0	1.0856	1.13027	0	0	2.6383	2.14279	0	0	1.4872	1.41724	0	0	1.16847	1.21046	0	0
16/3/2015	2.36248	2.07226	0	0	12.3696	6.40632	0	0	6.25972	7.45439	0	0	42.6442	11.6734	0	1	5.88858	7.73662	0	0	5.77614	4.42194	0	0	1.09124	1.13456	0	0	2.34068	2.2485	0	0	1.30898	1.06408	0	0	1.00025	1.28224	0	0
17/3/2015	2.99994	2.33001	1	0	11.6091	6.08453	0	0	6.84478	6.04674	0	0	40.3098	12.3532	2	1	6.64721	7.1156	0	0	5.08439	4.72975	1	0	1.10364	1.13562	0	0	2.35683	2.13184	0	0	1.12183	0.908638	0	0	1.18866	1.26283	0	0
18/3/2015	2.06816	1.87938	1	0	11.2381	6.0997	0	0	6.45119	6.11273	0	0	35.5136	10.619	0	2	6.96835	7.43402	0	0	6.09622	5.57745	0	0	1.09775	1.13285	0	0	2.21215	2.56504	0	0	1.27945	1.29787	0	0	1.08455	1.2522	0	0
19/3/2015	2.82606	1.81276	0	0	13.1739	6.16857	0	0	5.44856	5.6792	0	0	35.4089	10.8738	0	2	6.84488	6.41648	0	0	4.07352	6.43615	1	0	1.09079	1.08374	0	0	2.2682	2.89492	0	0	1.76015	2.32821	0	0	1.1011	1.20256	0	0
20/3/2015	1.93316	1.75726	0	1	9.84654	9.88589	0	0	5.37422	5.69472	0	0	35.9099	14.3706	0	0	7.20951	6.73785	0	0	7.88438	5.1637	1	0	1.09792	1.0853	0	0	1.45349	2.08607	0	0	1.46656	2.39495	0	0	1.1546	1.24046	0	0
21/3/2015	1.52791	1.6278	0	1	8.22092	11.8601	0	0	4.76864	5.75996	0	0	22.4695	15.4864	0	0	6.84453	6.11818	0	0	10.5552	6.88771	0	0	1.07598	1.07425	0	0	1.99695	1.85007	0	0	1.52229	2.26826	0	0	1.24741	1.17098	0	0
22/3/2015	1.72729	2.35792	0	0	9.31872	13.5381	1	0	5.55421	4.63063	0	0	21.2226	18.0466	0	0	6.90615	6.3558	0	0	10.9079	4.74283	0	1	1.06386	1.05074	0	0	2.07458	1.98254	0	0	0.888664	1.84909	0	0	1.23179	1.14964	0	0
23/3/2015	1.99761	1.85192	1	0	12.2884	11.6179	1	0	4.80953	5.25693	0	0	20.6245	13.9071	0	1	6.72799	7.82117	0	0	10.3901	4.32653	1	0	1.05012	1.04289	0	0	2.28846	1.58554	0	1	0.994479	1.94778	0	1	1.11404	1.09556	0	0
24/3/2015	2.00206	1.67345	1	1	7.23707	9.78294	1	0	4.18082	5.68755	0	0	20.302	16.6977	0	1	6.82865	7.62771	0	0	6.91783	4.89947	1	0	1.03772	1.00001	0	0	2.07531	1.8142	0	2	0.928537	1.80447	0	0	1.13732	0.944884	0	0
25/3/2015	1.35547	1.53516	1	0	7.18402	8.25541	0	0	4.08366	5.74426	0	0	22.0822	17.9268	0	0	6.80412	7.3361	0	0	3.8939	6.70067	1	0	1.03231	0.985403	0	0	2.10422	1.96765	0	2	0.876126	1.75676	0	0	1.12607	1.08046	0	0
26/3/2015	1.67862	1.4462	0	0	6.91065	8.86616	0	0	4.03582	5.037	0	0	22.7337	17.4469	0	0	7.25701	7.05684	0	0	4.48286	6.54651	0	0	1.04415	0.979259	0	0	2.34951	2.27307	0	0	0.865069	1.82276	0	0	1.16225	0.952333	0	0
27/3/2015	1.95918	2.01625	0	0	6.83447	7.96161	0	0	3.9453	4.88958	0	0	20.991	28.4626	0	0	7.78439	6.55554	0	0	4.49388	6.2169	0	0	1.04527	0.968045	0	0	1.83674	2.20492	0	1	0.920461	1.0974	0	0	1.17083	1.04217	0	0
28/3/2015	1.94801	2.00654	0	0	6.87584	8.02304	0	0	4.66822	5.33903	0	0	21.6142	24.7252	0	0	8.4345	6.02049	0	0	4.23645	3.69319	1	0	1.07219	0.975191	0	0	1.81562	2.32781	0	0	1.21135	1.27898	0	0	1.21095	1.03258	0	0
29/3/2015	1.69902	2.18729	0	0	5.83759	9.23184	0	1	4.43378	5.21944	0	0	25.009	17.4386	0	3	8.39639	5.99602	0	0	7.21454	4.01949	0	0	1.08229	0.928166	0	0	1.62606	2.17306	0	0	1.13086	1.31882	0	0	1.23304	1.04391	0	0
30/3/2015	2.03836	1.74333	0	0	6.69228	7.27215	0	0	3.85888	4.76689	0	0	31.0044	18.2432	0	1	8.65127	6.13968	0	0	5.97981	4.10137	0	0	1.07126	0.876879	0	0	2.15092	1.97232	0	0	1.07095	1.03172	0	0	1.22202	0.993986	0	0
31/3/2015	2.21129	1.72375	0	0	7.37709	8.00727	0	0	4.07531	4.53766	0	0	26.7875	18.3847	0	0	7.89781	6.11443	0	0	6.45751	4.10266	0	0	1.04	0.87392	0	0	1.81395	2.31993	0	1	1.12184	0.965535	0	0	1.21625	1.02667	0	0
1/4/2015	2.4206	2.05998	0	0	7.43726	6.72405	0	0	4.4908	4.4991	0	0	26.1668	20.0176	0	1	7.55227	6.11039	0	0	5.52723	4.48525	0	0	1.03027	0.769015	0	0	1.64289	1.76308	0	0	1.06471	1.04624	0	0	1.06807	0.905612	0	0
2/4/2015	2.31404	2.4181	0	0	6.79743	4.46188	0	0	4.42764	4.51719	0	0	22.2865	25.5944	0	1	7.86085	5.93312	0	0	6.27769	4.24072	0	0	0.970289	0.777616	0	0	1.66938	1.78378	0	0	1.25559	1.15194	0	0	1.09167	0.901851	0	0
3/4/2015	2.29662	1.63318	0	1	7.1426	4.64874	0	0	4.00515	4.39016	1	0	26.1874	26.4184	0	1	7.71448	6.01864	0	0	5.73317	4.37223	0	0	0.975868	0.770378	0	0	1.91981	1.84427	0	0	1.22227	1.29436	0	0	1.07578	0.907045	0	0
4/4/2015	2.20285	1.71459	0	0	7.24627	4.72444	0	0	4.57464	3.96785	0	0	25.9699	23.015	0	1	8.07828	6.13207	0	0	5.94456	4.18623	0	0	0.991812	0.770851	0	0	1.5109	1.9107	0	0	1.29194	1.26896	0	0	1.16659	0.942831	0	0
5/4/2015	1.99531	1.55458	0	0	6.71408	4.43836	0	1	4.88734	3.91939	0	0	25.1804	30.4106	0	0	7.53516	6.07001	0	0	7.33185	4.68971	0	1	1.01505	0.769164	0	0	2.22065	2.25268	0	0	1.3353	1.09038	0	0	1.12632	1.34115	0	0
6/4/2015	1.92206	2.14651	0	0	5.2177	4.96042	0	0	4.2017	4.68924	0	0	24.1011	34.9369	0	0	8.07999	5.92483	0	0	8.1273	5.46135	0	1	1.00114	0.765684	0	0	2.11787	2.06518	0	0	1.30276	0.884442	0	0	1.15442	1.21854	0	0
7/4/2015	1.88961	1.80588	0	0	6.5955	5.00994	0	0	4.10987	3.36815	0	0	23.7109	25.3838	0	0	7.27524	6.00388	0	0	8.63911	5.2772	0	1	1.00305	0.778994	0	0	2.19943	1.95212	0	0	1.4077	1.17595	0	0	1.15039	1.42671	0	0
8/4/2015	2.01244	1.66349	0	0	7.14398	5.68697	0	0	3.47795	4.53858	0	0	22.8003	27.4497	0	0	7.72362	6.10907	0	0	6.68381	5.81149	0	0	1.0045	0.795367	0	0	2.24226	1.79121	0	0	0.918042	0.966601	0	0	1.14922	1.43375	0	0
9/4/2015	2.16906	2.09205	0	0	6.9259	6.97752	0	0	2.78716	4.74052	0	0	29.5021	30.7337	0	0	8.12415	5.90888	0	0	7.95082	5.78482	0	0	1.0136	0.847428	0	0	2.22404	2.06808	0	0	1.00748	0.850487	0	0	1.23503	1.29639	0	0
10/4/2015	2.01339	4.28125	0	0	6.5729	8.13057	0	1	3.1443	5.4273	0	0	29.7383	33.8628	0	0	6.96445	6.35879	0	0	8.60919	6.13111	0	0	1.03407	0.842507	0	0	1.76523	2.19951	0	0	1.08758	0.827311	0	0	1.22094	1.2567	0	0
11/4/2015	1.76822	2.30922	0	0	5.19183	6.81965	0	0	2.93387	5.50954	0	0	31.2724	27.6285	0	0	6.70166	7.38447	0	0	9.46156	5.52445	0	0	1.0316	0.897888	0	0	1.50879	2.54626	0	0	1.16473	1.40017	0	0	1.2649	1.31603	0	0
12/4/2015	1.81505	4.09627	0	0	4.49945	8.79741	0	0	2.31144	6.20816	0	0	30.5523	28.2273	0	1	7.24	6.70061	0	0	12.0742	4.85638	0	1	1.02514	0.895401	0	0	1.34438	1.94497	0	0	1.09209	1.27413	0	0	1.25447	0.876741	0	0
13/4/2015	1.83038	2.45623	0	0	4.34606	7.86311	0	0	3.32024	4.65138	0	0	31.9467	37.9319	0	0	6.83893	6.59729	0	0	11.2493	4.66325	0	1	1.01618	0.929404	0	0	2.22679	2.06769	0	0	1.15809	1.04885	0	0	1.28812	0.929133	0	0
14/4/2015	2.02235	2.16079	0	0	3.23014	6.16139	0	1	4.06152	4.4384	0	0	30.7269	42.9986	0	0	6.66639	6.5985	0	0	10.1811	3.889	0	1	1.01109	0.892112	0	0	2.40115	1.86606	0	0	1.38453	1.02324	0	0	1.28328	0.916886	0	0
15/4/2015	2.19021	1.60527	0	0	4.46235	5.26132	0	0	2.63191	4.18124	0	0	33.4549	48.3342	0	0	6.23354	6.8043	0	0	11.1757	4.98605	0	0	0.939805	0.852229	0	0	2.52335	1.87087	0	0	1.16335	1.0974	1	0	1.28934	1.09284	0	0
16/4/2015	2.20692	1.96025	0	0	4.84818	4.87864	0	1	3.11618	4.52971	0	0	36.9109	44.3205	0	0	6.52335	6.60242	0	0	10.1592	6.68962	0	0	0.920025	0.86562	0	0	2.724	1.78929	0	0	1.25899	1.04735	0	0	1.28203	1.09798	0	0
17/4/2015	2.14611	2.49058	0	0	5.13616	8.23125	0	1	3.21553	4.90278	0	0	31.9388	37.2738	0	0	6.90473	6.63456	0	0	9.51187	6.66326	1	0	0.888374	0.854567	0	0	2.63472	1.81893	0	0	1.19658	1.82828	0	0	1.27894	1.11131	0	0
18/4/2015	2.0874	2.26306	0	0	5.63208	8.42735	1	1	3.33584	4.47923	0	0	33.1839	31.6812	0	0	6.97434	6.69456	0	0	7.52052	5.77377	0	0	0.892682	0.841668	0	0	2.55748	1.74826	0	0	1.42877	1.8313	0	0	1.29365	1.2043	0	0
19/4/2015	2.15361	2.3339	0	0	5.73109	8.28755	0	1	3.69894	3.26728	0	0	30.0656	36.9569	0	0	7.1174	8.33618	0	0	9.60594	4.91723	0	0	0.880607	0.910494	0	0	3.09509	1.59642	0	0	1.78438	1.68161	0	0	1.31228	1.2406	0	0
20/4/2015	2.81852	2.33394	0	0	6.39384	8.64074	0	0	2.95246	3.21119	0	1	27.894	32.2426	0	0	7.0082	6.61765	0	0	9.46035	5.72419	0	0	0.884589	0.8815	0	0	2.42651	1.71118	0	0	1.39163	0.702378	0	0	1.22899	1.20001	0	0
21/4/2015	2.87736	2.17604	0	0	7.62585	10.3929	0	0	3.26907	3.59535	1	0	32.2557	29.7918	0	0	6.91009	7.16663	0	0	9.46965	3.77064	0	0	0.887906	0.887406	0	0	2.6432	1.60392	0	0	1.35007	1.47036	0	0	1.2862	1.18435	0	0
22/4/2015	3.55017	2.5973	0	0	8.10708	8.20233	0	0	2.52904	3.97001	0	0	33.0478	31.7151	0	0	6.46289	7.13497	0	0	9.82464	3.99318	0	1	0.882565	0.894234	0	0	2.58272	1.57893	0	0	1.15972	1.35283	1	0	1.26591	1.29127	0	0
23/4/2015	2.63599	2.59556	0	0	9.18633	9.8868	0	0	1.78136	4.22898	0	0	32.4066	31.1653	0	0	6.112	7.8242	0	0	5.38173	4.45003	0	1	0.883373	0.841783	0	0	2.22526	1.78035	0	0	1.24985	1.24576	0	1	1.26927	1.16317	0	0
24/4/2015	2.63296	2.71192	0	0	6.02281	9.39266	0	0	1.8869	3.54417	0	1	33.0242	26.5463	0	0	5.56036	6.76322	0	0	4.21255	4.38548	1	1	0.877316	0.78167	0	0	1.71025	1.80106	0	0	1.10667	1.04297	0	1	1.22477	1.22413	0	0
25/4/2015	2.58748	2.52622	0	0	5.23614	9.78691	0	0	1.80339	3.76744	0	0	30.1974	26.9312	0	0	5.68848	5.31567	0	0	4.01821	5.13671	1	0	0.870193	0.846665	0	0	1.86753	1.92585	0	0	0.835832	1.30819	0	0	1.19054	1.09664	0	0
26/4/2015	2.59156	2.65354	0	0	4.81423	10.9596	0	0	2.01714	4.22905	0	1	32.1033	20.6521	0	0	7.07617	5.68914	0	0	4.98364	4.99442	0	0	0.79697	0.795836	0	0	1.81131	2.10362	0	0	1.05024	1.02817	0	0	1.14434	1.10092	0	0
27/4/2015	2.73651	3.37214	0	0	5.79482	10.1551	0	0	2.17155	4.4904	0	1	35.4621	21.5036	0	0	6.52918	5.57458	0	0	5.14703	4.93858	0	0	0.777339	0.841433	0	0	1.94861	2.44061	0	0	0.977946	1.06795	0	0	1.16294	1.1433	0	0
28/4/2015	2.9532	3.36143	0	0	5.20337	10.4007	0	0	2.19807	4.11713	0	0	31.8963	21.9388	0	0	6.75519	5.48186	0	0	4.89468	4.10896	0	0	0.781871	0.835885	0	0	1.76955	2.06989	0	0	1.39463	0.867179	0	0	1.13148	1.09256	0	0
29/4/2015	2.38399	3.22151	0	0	5.30435	9.30039	0	0	1.95884	4.23446	0	0	35.8398	19.2256	0	0	6.4959	5.16612	0	0	6.50454	3.59371	1	0	0.685634	0.870547	0	0	2.01388	2.26761	0	0	0.968192	1.02272	0	0	1.16157	1.10467	0	0
30/4/2015	2.43873	3.49359	0	0	5.90258	7.89597	0	0	1.96851	3.9963	0	0	29.8693	18.9093	0	0	6.04929	4.77877	0	0	5.77844	3.49496	1	0	0.678067	0.832379	0	0	1.90745	1.94228	0	0	1.30914	0.952604	0	1	1.12383	1.14145	0	0
1/5/2015	2.72063	3.54857	0	0	7.34187	7.80771	0	0	2.78087	5.69151	0	0	36.5006	22.3913	0	0	5.43575	4.89412	0	0	6.17136	4.52074	1	1	0.74561	0.824376	0	0	1.98631	2.27077	1	0	1.24762	1.16123	0	0	1.02852	1.08832	0	0
2/5/2015	2.21729	3.60347	1	0	6.40437	8.68077	0	0	2.55484	5.07874	0	0	30.042	18.4234	0	0	6.45638	4.97999	0	0	6.27592	3.68853	0	1	0.787704	0.828559	0	0	1.91804	2.35477	1	0	1.27474	0.992069	0	1	1.19448	0.992531	0	0
3/5/2015	2.5199	3.86393	0	1	5.32993	8.77441	0	0	4.18653	6.1343	0	0	25.0032	21.9055	0	0	5.74748	5.94471	0	0	9.52826	5.9418	0	1	0.80911	0.838649	0	0	1.62079	2.03868	0	0	1.28789	0.873707	0	1	1.18646	1.02996	0	0
4/5/2015	3.07403	2.69485	0	0	4.69359	12.1645	0	0	5.00284	6.15094	0	0	20.1557	23.3131	0	0	5.50144	5.82477	0	0	8.9707	5.36158	0	1	0.828436	0.847147	0	0	1.7244	2.02692	0	0	1.3166	0.951248	0	1	1.40072	1.07652	0	0
5/5/2015	2.43254	2.58717	0	0	5.21402	13.605	0	0	5.53087	6.39037	0	0	21.7196	22.3761	0	0	5.80233	5.95969	0	0	6.58577	4.45428	0	1	0.764542	0.833953	0	0	1.54548	2.07076	0	0	1.17035	1.2201	0	0	1.24008	1.11562	0	0
6/5/2015	2.33983	2.18705	0	0	5.34472	12.2507	0	0	5.07913	5.63054	0	0	26.0408	21.303	0	0	6.01179	5.514	0	0	6.57962	8.22564	0	1	0.957081	0.829013	0	0	1.30252	1.65157	0	0	1.16685	1.07886	0	0	1.12928	1.09868	0	0
7/5/2015	2.1914	2.30479	0	0	5.70968	9.96219	0	0	4.64585	4.85549	0	0	28.8781	21.6954	0	0	6.34875	4.44551	0	0	6.90886	3.96844	0	0	0.960024	0.792842	0	0	1.49273	1.73046	0	0	0.990263	1.1219	0	0	1.14273	1.06293	0	0
8/5/2015	2.14101	2.20983	1	0	7.20636	7.8559	0	1	4.31426	4.82433	0	0	24.4115	25.64	0	0	7.14208	5.32661	0	0	8.84595	4.82998	0	0	0.963911	0.829962	0	0	1.31233	1.43972	0	0	1.10167	1.13689	0	0	1.31742	1.19173	0	0
9/5/2015	2.19342	2.95288	0	0	7.20952	7.6906	0	0	4.50478	4.01694	1	0	25.7534	25.5679	0	0	7.39203	5.05822	0	0	9.02476	5.15487	0	0	1.13699	0.83597	0	0	1.41926	1.27912	0	0	1.35182	0.899963	0	0	1.1324	1.20727	0	0
10/5/2015	2.38177	2.42706	0	0	6.45472	6.30998	0	1	4.22088	3.75128	0	0	30.9178	26.16	0	0	7.40961	4.78556	0	0	8.42878	6.30741	0	0	1.07048	0.832068	0	0	1.34544	1.22518	0	0	1.66759	0.870992	0	0	1.28471	1.2273	0	0
11/5/2015	2.35802	2.50167	0	0	5.87454	7.36672	0	1	4.13741	3.00087	0	1	29.1733	27.779	0	0	7.50719	5.33849	0	0	8.19691	4.50742	0	0	0.900264	0.773927	0	0	1.75604	1.30317	0	0	1.5105	1.08584	0	0	1.71733	1.2422	0	0
12/5/2015	2.12892	1.49382	1	0	6.19353	8.53927	0	1	5.4664	1.22301	0	2	28.0222	24.4253	0	0	6.4585	5.04071	0	0	7.79498	4.18449	0	0	0.905237	0.75778	0	0	1.98062	1.31851	0	0	1.59074	1.06198	0	0	1.51857	1.1303	0	0
13/5/2015	1.9761	1.96405	0	0	7.1974	6.89886	1	1	5.61159	1.19137	0	1	28.119	28.0009	0	0	7.15699	4.73264	0	0	7.67159	4.85669	0	0	0.64795	0.891046	0	0	1.78067	1.42741	0	0	1.36711	0.895665	0	0	1.5085	1.30535	0	0
14/5/2015	2.24803	1.85607	0	0	7.40931	6.56723	0	0	4.79517	1.09595	0	2	19.1708	26.9607	0	0	7.22168	5.79304	0	0	6.70302	5.30835	0	0	0.568483	0.88979	0	0	1.77766	1.40677	0	0	1.35214	0.85003	0	1	1.7266	1.13253	0	0
15/5/2015	2.28768	1.8142	0	0	6.94417	6.99209	0	0	3.09186	1.57134	0	1	23.0958	27.098	0	0	6.4382	5.88997	0	0	7.31396	5.72186	0	0	0.739182	0.75654	0	0	1.77802	1.65661	0	0	1.2875	0.805141	0	1	1.669	1.10409	0	0
16/5/2015	2.83598	1.66143	0	0	6.84382	10.2897	0	0	2.82339	1.31705	0	2	18.8195	28.1524	1	0	6.47449	6.67042	0	0	7.95566	6.72694	0	1	0.751903	0.679761	0	0	1.53388	1.6875	1	0	1.59189	0.955889	0	0	1.76187	1.11616	0	0
17/5/2015	2.77037	1.78351	0	0	5.93619	7.34595	0	0	2.36282	1.18692	0	1	21.6324	26.3011	1	0	6.37711	5.72753	0	0	5.1859	6.67202	0	1	0.699018	0.671365	0	0	1.49261	1.86881	1	0	1.66356	0.837127	0	0	1.81832	0.992772	0	0
18/5/2015	2.20277	1.73336	0	0	5.93552	6.905	0	0	3.1894	1.3804	0	0	22.4709	22.3323	0	0	6.4598	5.48285	0	0	4.46571	5.87927	0	1	0.695373	0.667944	0	0	1.87283	1.95766	0	0	1.8703	0.768896	0	0	1.8139	1.05717	0	0
19/5/2015	2.26446	1.62802	0	0	7.03375	7.35109	0	0	3.50198	1.35691	0	0	23.5497	26.2482	0	0	6.16968	5.67205	0	0	8.31196	5.82348	0	1	0.683118	0.660238	0	0	1.34819	1.68448	1	0	1.643	0.847082	0	0	1.60573	1.17363	0	0
20/5/2015	1.96763	1.72165	0	0	6.57618	7.11599	0	0	3.45443	1.55983	0	0	19.7077	22.2173	1	0	5.4647	5.41732	0	0	8.72201	6.52692	0	0	0.90009	0.610492	0	0	1.3669	1.69507	1	0	1.34819	0.844622	1	0	1.75419	1.01327	0	0
21/5/2015	1.9119	2.05521	0	0	5.1574	6.89785	0	0	2.79523	1.0599	0	0	19.2537	22.9034	0	0	5.03484	5.36237	0	0	7.39804	6.15111	0	0	0.853176	0.597325	0	0	1.53725	1.55602	1	0	1.39502	0.798521	0	0	1.1811	1.01933	0	0
22/5/2015	1.74427	2.04543	0	0	3.99376	5.99812	0	0	2.08362	1.22576	0	0	26.8305	20.5239	0	0	4.79023	4.78853	0	0	7.31002	4.95344	0	0	0.852062	0.596539	0	0	1.24219	1.74098	1	0	1.30016	1.18825	0	1	1.27338	1.19748	0	0
23/5/2015	1.74288	2.39134	0	0	4.44999	6.45199	1	0	2.35869	1.30081	0	0	18.8781	12.8658	1	0	4.94794	4.51149	0	0	9.7152	3.69225	0	0	0.97155	0.598807	0	0	1.43338	1.65277	1	0	1.38951	1.00292	0	0	1.30813	1.17241	0	0
24/5/2015	1.67074	2.13249	0	1	3.96744	6.19147	1	1	2.52876	1.32581	1	0	16.2405	16.0246	1	0	4.81094	4.41763	0	0	5.21946	3.40647	0	0	0.742182	0.523397	0	0	1.29674	1.78	1	0	1.28804	0.81432	0	1	1.26554	1.13154	0	0
25/5/2015	1.63895	1.78775	0	0	4.18745	5.79826	1	1	2.38673	0.988699	0	1	16.3674	10.6296	0	0	4.88351	4.21741	0	0	4.38295	3.82875	0	1	0.920228	0.546337	0	0	1.39873	1.87727	1	0	1.35974	0.729828	0	1	1.37296	1.09078	0	0
26/5/2015	1.42887	1.88686	0	0	5.13485	6.63593	1	0	1.96257	1.06123	2	1	23.3371	11.2347	0	0	4.29283	4.57772	0	0	3.39198	3.56897	0	0	0.646481	0.55605	0	0	1.29122	1.69057	1	0	1.43146	1.10565	0	0	1.19645	1.00734	0	0
27/5/2015	1.4865	1.68842	0	0	5.95548	5.86299	0	0	1.92899	0.863001	2	0	30.4646	13.3691	0	0	4.47754	4.57685	0	0	3.33009	3.12881	0	1	0.586191	0.563273	0	0	1.21318	1.63825	0	0	1.16296	1.34802	0	0	1.1091	0.858279	0	0
28/5/2015	1.7487	1.66451	0	0	5.10204	4.71688	1	0	1.77718	0.841814	1	0	32.3948	13.3772	0	0	4.53202	3.71769	0	0	4.09211	3.38914	0	1	0.635038	0.575031	0	0	1.22846	1.6265	1	0	1.10051	0.889884	0	0	1.05252	0.948513	0	0
29/5/2015	1.55919	1.81861	0	0	6.2993	5.29187	0	0	2.58308	0.99626	0	0	33.9252	18.0593	0	0	4.33073	3.78494	0	0	3.50137	4.76034	0	0	0.646896	0.624549	0	0	1.41112	1.47575	1	0	1.10045	0.903575	0	0	1.01026	0.874896	0	0
30/5/2015	0.982397	1.76307	1	0	5.75612	5.86517	0	0	2.4767	1.19487	0	1	31.0053	24.5815	0	0	4.0417	4.05934	0	0	3.79434	5.08792	0	0	0.644927	0.614109	0	0	1.37879	1.54677	1	0	1.23321	0.869497	0	0	0.953397	0.8917	0	0
31/5/2015	0.910129	1.50393	0	0	6.57259	5.61563	0	0	1.57285	1.43252	0	0	28.8035	11.0155	0	0	4.19086	4.06013	0	0	3.97605	4.22155	0	0	0.588734	0.608567	0	0	1.31926	1.69437	1	0	1.38699	0.911252	0	0	0.982304	0.936135	0	0
1/6/2015	1.24884	1.52633	0	0	5.98078	5.53669	0	0	1.23296	1.50928	1	0	28.9577	13.9184	0	1	3.83751	3.46701	0	0	4.10607	3.90311	0	0	0.592022	0.611494	0	0	1.67789	2.06205	0	0	1.23076	0.98955	0	0	1.01896	0.931024	0	0
2/6/2015	1.17042	1.63956	0	0	5.48998	4.24519	0	0	1.23639	1.15786	0	0	24.736	21.7351	0	0	3.50733	4.04068	0	0	3.94252	3.70706	0	0	0.585827	0.612166	0	0	1.75	2.08605	0	0	1.28766	0.91469	0	0	1.03943	0.954792	0	0
3/6/2015	1.15486	1.56646	0	0	4.85916	3.2195	0	0	0.999209	1.16482	0	0	27.4295	19.339	0	0	3.16916	4.27817	0	0	3.68283	4.03111	0	0	0.521967	0.614257	0	0	1.72322	1.8824	0	0	1.18168	0.887626	0	0	0.875697	0.936191	0	0
4/6/2015	1.07267	1.63535	0	0	5.00465	2.89712	1	0	1.18524	1.09345	0	0	24.8336	27.3169	0	0	3.25868	3.63929	0	0	3.91066	4.85354	0	0	0.525142	0.544345	0	0	1.78174	2.18787	0	0	1.40662	0.86597	0	0	0.91172	0.989565	0	0
5/6/2015	0.923724	1.46221	0	0	5.61206	2.96716	0	0	1.31985	0.955872	1	0	33.3893	17.6981	0	0	3.33942	3.43919	0	0	2.83323	3.67081	0	0	0.44797	0.545608	0	0	1.58374	2.26276	0	0	0.832629	0.878144	0	0	0.918638	1.00627	0	0
6/6/2015	1.71881	1.78838	0	0	6.2744	3.49115	0	0	1.19778	0.977928	0	0	26.1608	18.9445	0	0	3.45778	3.81911	0	0	2.59843	3.66264	0	0	0.455759	0.471624	0	0	1.73098	2.06473	0	0	1.02859	0.862406	0	0	0.95159	0.948398	0	0
7/6/2015	1.52572	1.61399	0	0	6.2712	2.63191	0	0	1.29171	1.00374	1	0	33.3414	19.2965	0	0	3.51008	3.91026	0	0	2.52791	3.17948	0	0	0.452196	0.40383	0	0	1.73214	2.01773	0	0	0.930755	0.812148	0	0	0.905862	0.977008	0	0
8/6/2015	1.32623	1.49751	0	0	5.2919	3.25328	0	1	1.30904	1.62214	0	1	25.975	25.2299	0	0	2.8765	3.77315	0	0	2.7382	3.52499	0	0	0.428304	0.328217	0	0	1.75664	2.10264	0	0	1.48026	0.798176	0	0	0.815114	0.973431	0	0
9/6/2015	1.24971	1.54822	0	0	6.07524	3.97898	0	1	1.22562	1.7568	0	0	19.0876	11.9869	0	0	2.98564	3.82861	0	0	2.54305	3.73959	0	0	0.430873	0.366929	0	0	1.81658	2.11702	0	0	1.47175	0.717155	0	0	0.901077	1.03105	0	0
10/6/2015	1.28619	1.50778	0	0	5.87813	3.62917	0	0	1.28841	1.59722	0	0	19.6619	14.5015	0	0	2.5185	2.42136	0	0	2.55005	5.06061	0	0	0.441956	0.239821	0	0	1.85339	2.05507	0	0	1.06495	0.646018	0	0	1.025	1.02103	0	0
11/6/2015	1.3172	1.5062	0	0	5.72267	3.92373	0	0	1.26061	1.78004	0	0	21.8112	18.632	0	0	2.61033	2.67035	0	0	2.27176	4.02472	0	0	0.43649	0.276865	0	0	1.93618	1.93714	0	0	0.924248	0.640233	0	0	0.99694	1.0065	0	0
12/6/2015	1.3006	1.36538	0	0	5.37584	3.08262	0	1	0.904887	1.21908	0	0	20.781	16.7988	0	1	2.76116	2.59077	0	1	4.14524	3.6921	0	0	0.393305	0.279608	0	0	1.66085	1.89778	0	0	1.02763	0.688096	0	0	0.981925	1.03458	0	0
13/6/2015	1.06593	1.25339	1	0	4.67791	3.60119	0	0	0.888745	1.28785	0	0	17.4673	17.0895	0	1	2.81791	2.5459	0	0	3.8015	3.36096	0	0	0.4302	0.31085	0	0	2.10876	1.4928	0	0	0.965716	0.788088	1	0	0.992352	1.00208	0	0
14/6/2015	0.850697	1.31108	0	0	3.84166	3.65658	1	0	0.882939	1.12579	0	0	18.7902	16.8734	0	1	2.53136	2.40183	0	1	3.57441	3.36469	0	0	0.388018	0.30206	0	0	1.87059	1.6372	0	0	1.03906	0.805132	0	0	1.02265	0.94185	0	0
15/6/2015	1.18682	1.12834	0	0	6.08593	3.34633	0	0	0.767967	1.25597	1	0	23.4178	22.8089	0	2	2.59825	2.55986	0	0	2.85023	3.31399	0	0	0.382347	0.300978	0	0	1.88983	1.62424	0	0	1.03708	0.648944	0	0	0.975781	0.984604	0	0
16/6/2015	1.1121	1.2556	0	0	6.2407	2.84646	0	0	0.606386	1.0786	1	0	12.6952	17.179	0	2	2.4559	2.21916	0	1	2.83813	3.70878	0	0	0.331528	0.299337	0	0	2.23293	1.72443	0	0	0.868658	0.754225	0	0	1.04176	0.984587	0	0
17/6/2015	1.00945	0.856455	0	0	4.82964	2.64682	0	0	0.821289	1.0307	1	0	10.6358	15.2019	0	1	2.03075	1.85615	0	0	2.2048	4.01382	1	0	0.359383	0.336658	0	0	1.61601	1.56894	0	0	1.05459	0.791343	0	0	1.05558	0.975498	0	0
18/6/2015	1.20686	0.946488	0	0	4.14393	3.56542	0	1	0.799331	1.16569	1	0	11.18	16.2373	0	1	1.99569	2.25916	0	0	2.63428	3.97788	0	0	0.279384	0.36488	0	0	1.6395	1.32817	0	0	1.01715	0.858922	0	0	0.892389	0.937296	0	0
19/6/2015	1.02528	0.990796	0	0	3.43396	2.55913	1	0	0.843527	1.12158	1	0	13.6719	17.2962	0	2	2.33994	1.8827	0	0	2.49773	3.75402	0	0	0.270463	0.353534	0	0	2.14442	1.31389	0	0	1.106	0.91844	0	0	0.870941	0.932502	0	0
20/6/2015	1.01365	0.868076	0	0	2.98471	2.44424	1	0	0.633169	0.545541	0	0	17.1134	15.2225	1	1	2.4475	1.63922	1	0	1.87228	3.35827	1	0	0.263133	0.342244	0	0	1.66953	1.36116	0	0	1.2337	0.895186	0	0	0.857059	0.933075	0	0
21/6/2015	0.823372	0.797045	0	0	2.32366	2.5488	0	0	1.16335	0.650736	0	0	19.2146	15.2712	1	1	2.18212	1.60167	0	0	1.80477	2.68246	0	1	0.185081	0.334219	0	0	1.74052	1.28814	0	0	1.02199	0.889772	0	0	0.880519	1.02219	0	0
22/6/2015	1.11089	0.843078	0	0	2.08214	2.24256	0	0	0.434695	0.616263	1	1	19.1585	17.3046	1	0	2.70835	1.44957	0	0	1.87447	3.38906	0	1	0.175346	0.331482	0	0	1.87695	1.14924	0	0	1.16532	0.92629	0	0	0.956368	0.98219	0	0
23/6/2015	1.0248	0.745421	0	1	1.78974	2.57981	0	1	0.557678	0.608447	0	1	15.4788	25.344	0	0	2.58388	1.39998	2	0	2.37074	3.51981	0	1	0.206312	0.250124	0	0	1.85888	1.23743	0	0	0.746267	0.952106	0	0	0.939982	1.025	0	0
24/6/2015	0.838285	0.988241	0	0	3.11243	1.95084	2	1	0.611888	0.775713	0	0	15.1207	17.0542	0	0	2.51133	1.14881	0	1	3.24855	3.7497	0	0	0.198403	0.243978	0	0	1.63997	1.49817	0	0	0.841196	0.857278	0	0	0.942377	0.972229	0	0
25/6/2015	0.840975	0.851178	0	0	3.29004	3.77714	2	3	0.609091	0.678744	1	0	14.8629	18.947	0	1	1.53323	1.26773	0	1	4.0908	3.99021	1	0	0.197522	0.235368	0	0	1.76048	1.40707	0	0	0.79561	0.830233	0	0	0.918683	0.955376	0	0
26/6/2015	0.833	0.984417	0	0	3.98646	4.07497	0	0	0.717021	0.53954	1	0	14.1889	15.2679	1	0	2.1856	1.14492	0	0	3.01481	4.12808	1	0	0.194731	0.220737	0	0	1.68641	1.40855	0	0	0.700309	0.835148	0	0	0.953334	0.921405	0	0
27/6/2015	0.825789	0.938925	0	0	3.6145	4.66447	0	0	0.716464	0.499572	0	1	30.4945	12.6163	1	0	2.03945	0.931762	1	1	3.03178	3.5254	1	0	0.190834	0.208187	0	0	1.78319	1.26293	1	0	0.789594	0.752382	0	0	0.94397	0.919102	0	0
28/6/2015	0.952164	1.18559	0	0	3.74444	3.44159	0	0	0.69127	0.797922	0	1	29.2753	10.2106	0	0	1.74664	0.889653	0	1	3.02359	3.80283	1	0	0.173614	0.191835	0	0	1.75028	1.13676	0	0	0.783391	0.783036	1	0	0.920983	0.896247	0	0
29/6/2015	0.896463	0.973986	0	1	3.64836	3.4124	1	1	0.541998	0.808416	1	1	35.0182	9.81478	1	0	1.63518	0.777377	1	0	3.12632	3.54409	1	0	0.208009	0.222343	0	0	1.78824	1.14834	0	0	0.879177	0.765754	0	0	0.898619	0.927707	0	0
30/6/2015	0.890836	1.05518	0	0	2.95467	3.90824	0	0	0.649982	0.739345	0	1	30.7172	16.0956	2	0	1.95352	0.772093	0	2	2.283	2.80036	1	1	0.19693	0.212351	0	0	1.92334	1.25279	0	0	0.816452	0.845738	0	0	0.93557	0.92938	0	0
1/7/2015	0.775678	0.940067	0	0	3.0953	2.97106	0	0	0.654338	0.623629	0	0	25.4093	7.39432	1	0	1.90818	0.693025	0	2	2.14338	2.94418	0	0	0.19789	0.200919	0	0	1.50811	1.27527	0	0	0.712203	0.847873	0	0	0.979066	0.958587	0	0
2/7/2015	0.800484	1.12831	0	0	3.12055	2.33173	0	1	0.75842	0.701389	0	1	24.862	6.82697	1	0	1.91959	0.577852	0	2	1.72576	2.92478	1	0	0.206654	0.118552	0	0	1.53418	1.3902	0	0	0.70882	0.850385	0	0	0.916046	0.978254	0	0
3/7/2015	0.865859	0.955052	0	0	2.60301	1.8859	0	1	0.690576	0.6346	0	0	29.6341	6.76989	1	1	1.87852	0.642174	0	2	1.85572	3.07646	1	0	0.247888	0.10681	0	0	1.52958	1.16548	0	0	0.629569	0.848487	0	0	0.975887	0.949755	0	0
4/7/2015	0.853927	0.897925	0	0	2.33365	1.64419	0	0	0.60106	0.58364	0	0	30.4345	8.14923	2	0	1.2527	0.631552	0	2	1.69361	3.04594	0	0	0.137823	0.12979	0	0	1.31282	1.01161	0	0	0.697548	0.801868	0	0	0.855627	0.967393	0	0
5/7/2015	0.767206	0.900191	0	0	2.1719	3.3696	0	0	0.577986	0.52576	0	1	25.7186	8.89335	1	0	0.782111	0.508825	0	3	1.73374	2.59609	0	0	0.133631	0.125044	0	0	1.66846	1.13382	0	0	0.759012	0.536989	0	0	0.954737	0.871545	0	0
6/7/2015	0.696848	0.766778	1	1	2.38603	3.29413	0	1	0.508357	0.550196	0	1	24.8707	16.5873	1	0	0.772994	0.651186	1	1	1.91401	2.1793	0	0	0.0917129	0.121666	0	0	1.60794	1.177	0	0	0.78187	0.461681	0	0	0.929731	0.83145	0	0
7/7/2015	0.663931	0.794146	0	0	2.02415	4.03493	0	1	0.530067	0.593617	0	0	24.8915	8.53046	1	0	0.860408	0.566805	0	2	2.49466	2.36099	0	0	0.166975	0.116264	0	0	1.52417	1.22378	0	0	0.737884	0.516164	0	0	0.956286	0.798213	0	0
8/7/2015	0.780815	0.709189	0	0	2.16124	3.40231	1	0	0.45832	0.557648	0	0	25.6159	7.98247	1	0	0.754416	0.414516	0	2	2.58175	2.2646	0	0	0.163493	0.113288	0	0	1.48742	1.29259	0	0	0.620432	0.522707	0	0	0.877927	0.791261	0	0
9/7/2015	0.749381	0.619139	0	0	2.30401	3.21283	1	1	0.467819	0.482334	0	0	26.5352	8.02534	1	0	0.474696	0.413222	0	1	2.62856	2.09426	0	0	0.150433	0.112967	0	0	1.61634	1.3082	0	0	0.713926	0.535282	0	0	0.905804	0.842059	0	0
10/7/2015	0.746632	0.62012	0	0	1.9084	3.23746	1	1	0.369553	0.440223	0	0	26.5222	8.154	0	0	0.560143	0.46769	2	2	2.5939	2.15089	0	0	0.141499	0.147202	0	0	1.40851	1.34371	0	0	0.777525	0.51509	0	0	0.868592	0.97777	0	0
11/7/2015	0.754675	0.531503	0	0	1.67626	3.12362	0	0	0.38318	0.414094	1	0	26.5484	9.24775	0	0	0.289284	0.431437	1	3	2.51567	2.12848	0	1	0.139911	0.13964	0	0	1.29161	1.37225	0	0	0.780967	0.518647	0	0	0.800916	0.830949	0	0
12/7/2015	0.574219	0.513743	0	0	1.43163	2.92265	0	0	0.331177	0.469527	0	0	28.6933	10.5841	0	0	0.226604	0.456842	3	2	2.41559	2.41968	0	0	0.173592	0.131718	0	0	1.33331	1.22332	0	1	0.742183	0.590226	0	0	0.79966	0.909773	0	0
13/7/2015	0.562476	0.494635	0	0	1.28814	3.2071	1	1	0.270985	0.425366	0	0	29.4149	10.1037	0	0	0.303456	0.36036	1	3	1.83176	2.34212	0	0	0.169024	0.130949	0	0	1.27335	1.10562	0	1	0.709974	0.648135	0	0	0.811587	0.855881	0	0
14/7/2015	0.519608	0.488885	0	0	2.02498	2.34263	0	1	0.385217	0.407771	0	0	29.5077	9.31454	0	0	0.330646	0.396982	2	1	2.02102	2.04434	0	0	0.168946	0.119966	0	0	1.32746	0.994506	0	1	0.638424	0.622348	0	0	0.842854	0.965752	0	0
15/7/2015	0.553131	0.51023	0	0	1.66092	1.71649	0	0	0.37778	0.379792	0	2	26.6475	10.3686	0	0	0.361731	0.449651	2	1	2.5247	2.08247	0	1	0.161505	0.110012	0	0	1.28928	1.18489	0	0	0.550347	0.633769	0	0	0.807689	1.00812	0	0
16/7/2015	0.483804	0.510945	0	0	1.16216	1.02227	1	1	0.375512	0.296438	0	2	25.7539	9.18681	1	0	0.341426	0.412753	1	1	2.61601	1.98582	0	1	0.147772	0.0990029	0	0	1.43306	1.21956	0	0	0.607547	0.635052	0	0	0.844146	1.04278	0	0
17/7/2015	0.536126	0.453811	0	0	1.98959	1.16271	1	1	0.334769	0.390872	0	2	26.1672	8.58317	2	0	0.363918	0.350849	1	2	1.78554	2.34244	0	0	0.140683	0.0892684	0	0	1.35346	1.18085	0	0	0.575559	0.72392	0	0	0.893605	1.0779	0	0
18/7/2015	0.551901	0.493567	0	0	1.15955	1.3693	1	1	0.330063	0.265135	0	2	26.5709	8.82905	0	0	0.379508	0.336956	0	1	2.07167	2.72599	0	0	0.135495	0.0868041	0	0	1.35635	1.3397	0	0	0.624047	0.659826	0	0	0.914767	1.19093	0	0
19/7/2015	0.548101	0.521969	0	0	1.30804	1.67795	0	0	0.331744	0.241382	0	2	26.5308	15.7481	0	0	0.329499	0.385518	1	1	2.34807	2.2416	0	0	0.132897	0.0850991	0	0	1.26308	1.38063	0	0	0.638053	0.647567	0	0	0.92861	1.07112	0	0
20/7/2015	0.507366	0.469681	0	0	2.11288	1.7683	0	0	0.283766	0.22918	2	2	26.4088	16.3013	1	0	0.446316	0.243503	0	2	2.26517	2.01081	0	0	0.12075	0.0735052	0	0	1.18898	1.67983	0	0	0.534511	0.655555	0	0	0.953492	1.08173	0	0
21/7/2015	0.310097	0.485636	0	0	1.49652	1.65009	0	0	0.303603	0.364363	1	1	25.7718	16.9122	0	1	0.433722	0.274555	0	2	2.80878	2.35517	0	0	0.10854	0.0637798	0	0	1.16711	1.63865	0	0	0.550389	0.612548	0	0	0.968531	0.740034	0	0
22/7/2015	0.327325	0.482748	0	0	1.97333	1.33297	0	0	0.313917	0.387668	1	0	28.2484	11.4443	0	0	0.394142	0.223617	0	0	2.58915	2.36321	0	0	0.0985058	0.0612551	0	0	1.20482	1.89718	0	0	0.509267	0.617804	0	0	0.967411	0.682256	0	0
23/7/2015	0.349683	0.500758	0	0	2.10331	2.17545	0	0	0.309859	0.479227	1	0	28.8131	12.6945	0	0	0.376606	0.206893	1	1	2.64716	2.11512	0	0	0.0925562	0.0579552	0	0	1.27501	1.59681	0	0	0.562918	0.624254	0	0	0.962255	0.715332	0	0
24/7/2015	0.3346	0.62628	0	0	2.08109	2.1199	0	0	0.276377	0.405898	2	0	27.2157	11.5408	0	0	0.401176	0.308133	1	1	2.74484	2.38012	0	0	0.0810562	0.0499419	0	0	1.26285	1.59402	0	0	0.566591	0.622652	0	0	0.932711	0.76552	0	0
25/7/2015	0.324557	0.591497	0	0	2.12675	2.00694	0	0	0.233169	0.420759	2	0	28.9684	11.1932	0	0	0.376409	0.284547	0	0	2.80553	2.64681	0	0	0.0693435	0.0440124	0	0	1.24575	1.4014	0	0	0.650999	0.610892	0	0	0.935752	0.771884	0	0
26/7/2015	0.321606	0.641326	0	0	2.02245	1.8439	0	0	0.246389	0.316962	1	0	28.2146	12.5215	0	0	0.399306	0.260383	0	1	2.76033	2.87349	0	0	0.0601761	0.0410576	0	0	1.18361	1.5675	0	0	0.621092	0.600527	0	0	0.923607	0.784111	0	0
27/7/2015	0.354386	0.526693	0	0	1.90377	2.17906	0	0	0.259049	0.322896	0	0	26.5062	12.7744	1	0	0.328248	0.27814	0	0	2.82873	2.89372	0	0	0.0523814	0.0410491	0	0	1.0742	1.3596	0	0	0.654984	0.618627	0	0	0.851972	0.824938	0	0
28/7/2015	0.353871	0.497643	0	0	1.60314	0.785573	0	0	0.239537	0.15751	0	0	26.8136	12.1519	0	1	0.511856	0.34792	0	1	2.86599	3.04038	0	0	0.0493595	0.0403772	0	0	1.0992	1.31882	0	0	0.673283	0.600214	0	0	0.851342	0.836642	0	0
29/7/2015	0.2797	0.468288	1	0	1.30984	1.00295	0	0	0.210273	0.15858	0	1	25.8989	13.6881	0	0	0.512663	0.335895	0	1	2.71764	2.96927	0	0	0.0481964	0.0384409	0	0	1.01928	1.22615	0	0	0.635973	0.59688	0	0	0.872741	0.98996	0	0
30/7/2015	0.308683	0.379192	0	0	2.3241	0.599734	0	0	0.186092	0.155333	0	0	27.8058	14.0437	0	0	0.517179	0.272605	0	0	2.14529	2.82965	1	0	0.0445465	0.0383672	0	0	1.07658	1.25644	0	0	0.636754	0.607733	0	0	0.909061	1.0969	0	0
31/7/2015	0.263034	0.356366	0	0	2.32553	0.469026	0	2	0.183915	0.238379	0	0	22.0055	15.0462	1	0	0.496594	0.172187	0	0	2.0209	2.83246	0	0	0.0450074	0.0361148	0	0	1.17308	1.23126	0	0	0.576035	0.61835	0	0	0.924669	0.979564	0	0
1/8/2015	0.312116	0.311637	0	0	1.94644	0.580008	0	2	0.181707	0.24002	0	0	22.7437	14.2577	1	0	0.505847	0.243546	0	0	2.23166	2.40997	0	0	0.042652	0.0308623	0	0	1.16226	1.15654	0	0	0.720234	0.619078	0	0	0.913945	1.01759	0	0
2/8/2015	0.29673	0.258841	0	0	3.38507	0.665231	0	2	0.166535	0.190604	1	1	22.0637	16.9778	0	0	0.477838	0.232008	0	1	2.28464	2.44493	0	0	0.037672	0.0275411	0	0	1.25077	1.15078	0	0	0.539809	0.626349	0	0	0.906607	1.11409	0	0
3/8/2015	0.369051	0.261777	1	0	3.28261	0.967926	0	1	0.337214	0.236513	0	0	22.9457	12.1377	0	0	0.323315	0.175143	0	3	2.44571	2.61275	0	0	0.0294773	0.0228797	0	0	1.22747	1.22573	0	0	0.536361	0.694944	0	0	0.864035	1.08431	0	0
4/8/2015	0.312443	0.252583	0	0	2.38143	0.902058	0	2	0.282961	0.374174	1	0	25.2612	11.9869	1	0	0.317479	0.25349	0	3	2.42118	2.30138	1	0	0.0225443	0.0188315	0	0	1.24882	1.20052	0	0	0.659003	0.669718	0	0	0.868606	1.16539	0	0
5/8/2015	0.440539	0.277774	0	0	2.35582	0.971529	0	0	0.425006	0.352054	0	2	28.8501	12.2869	2	0	0.337693	0.331628	0	3	2.26942	1.83991	0	0	0.0174987	0.0196721	0	0	1.26487	1.21097	0	0	0.62174	0.662522	0	0	0.837974	1.04039	0	0
6/8/2015	0.379187	0.254848	0	0	2.34317	0.92538	0	0	0.311097	0.481328	0	2	27.7342	11.9157	2	0	0.358952	0.3253	0	2	2.29624	1.78473	0	1	0.018346	0.0194729	0	0	1.24107	1.37132	0	0	0.653212	0.667377	0	0	0.823241	1.0814	0	0
7/8/2015	0.460403	0.257142	0	0	2.28971	1.53539	0	0	0.261716	0.492738	0	1	27.1804	12.3783	2	0	0.260741	0.317204	0	1	1.87863	1.42857	0	1	0.0131627	0.0161939	0	0	1.20871	1.18348	0	0	0.590948	0.636802	0	0	0.793693	1.09779	0	0
8/8/2015	0.436931	0.240084	0	0	1.84891	1.45687	0	0	0.263349	0.531353	0	1	24.223	12.049	2	1	0.29321	0.315399	0	2	2.11763	1.53458	0	0	0.010198	0.0124426	0	0	1.21095	1.05191	0	0	0.611957	0.711152	0	0	0.770337	1.08903	0	0
9/8/2015	0.417914	0.243444	0	0	1.86357	1.9675	0	0	0.237837	0.484955	0	0	23.4973	12.1269	2	1	0.270738	0.443244	0	1	2.38156	1.7126	0	0	0.00950096	0.009376	0	0	1.23535	0.892896	0	0	0.633711	0.592341	0	0	0.936487	0.961212	0	0
10/8/2015	0.420352	0.224883	0	0	1.70413	2.44279	0	0	0.253086	0.588607	0	0	22.9467	12.1422	1	1	0.280772	0.476661	0	1	2.3245	1.63535	1	0	0.00865869	0.0128435	0	0	1.13452	0.912003	0	0	0.70504	0.54428	0	0	0.965862	0.797282	0	0
11/8/2015	0.31493	0.187678	0	0	1.6215	1.74251	0	0	0.26269	0.468284	0	0	23.685	10.698	1	1	0.276296	0.310751	0	1	2.27406	1.78686	1	0	0.0114947	0.0148451	0	0	1.14247	0.964289	0	0	0.607805	0.53386	0	0	0.975308	0.811748	0	0
12/8/2015	0.400087	0.165294	0	0	1.75422	1.35125	1	0	0.293086	0.492615	0	0	35.4943	10.4101	0	1	0.263261	0.312475	0	2	2.44542	1.71557	0	0	0.0121959	0.0100504	0	0	1.0955	1.01785	0	0	0.548648	0.572802	0	0	0.974311	0.837203	0	0
13/8/2015	0.560164	0.214418	1	0	1.87015	0.774911	0	1	0.261369	0.488024	1	0	26.5861	18.1875	1	1	0.25702	0.326056	0	2	2.25714	1.72374	0	0	0.00941126	0.00818635	0	0	1.11834	1.00912	0	0	0.521382	0.626408	0	0	0.896705	0.814859	0	0
14/8/2015	0.690441	0.257799	1	0	1.54822	0.782101	1	0	0.338888	0.40987	0	1	26.6941	9.08291	2	1	0.264484	0.344581	0	1	2.21541	1.69054	0	0	0.0081976	0.00728591	0	0	1.08152	1.0915	0	0	0.658055	0.546319	0	0	0.837057	0.774806	0	0
15/8/2015	0.506713	0.268927	0	0	1.75754	1.27961	2	0	0.358857	0.439415	0	0	31.0827	9.58225	0	1	0.274011	0.330195	0	1	2.41408	1.51937	0	0	0.00790456	0.0106455	0	0	1.17088	1.11661	0	0	0.552005	0.601705	0	0	0.862149	0.740691	0	0
16/8/2015	0.366333	0.260668	1	0	1.9306	1.29273	1	0	0.210663	0.299277	0	1	28.8096	9.57099	0	2	0.234292	0.334417	0	1	2.80401	1.99686	0	1	0.00781812	0.0121505	0	0	1.18477	1.13868	0	0	0.552513	0.573724	0	0	0.799457	0.770585	0	0
17/8/2015	0.367743	0.279273	0	0	2.66651	1.56752	1	1	0.221237	0.294892	0	1	27.7406	10.0192	0	1	0.31089	0.345468	1	0	2.52048	2.12319	0	1	0.00710586	0.011126	0	0	1.04597	1.12564	0	0	0.540183	0.55912	0	0	0.785187	0.740776	0	0
18/8/2015	0.374006	0.297459	0	0	2.57913	1.07335	1	1	0.267709	0.304702	0	0	23.9826	7.45723	0	2	0.304774	0.368147	0	1	2.54435	2.02455	0	0	0.00860163	0.00814855	0	0	0.997658	1.17729	0	0	0.520931	0.579328	0	0	0.76614	0.774037	0	0
19/8/2015	0.364239	0.230134	0	0	2.80928	0.887618	1	1	0.25121	0.282802	0	1	18.2168	7.52444	0	2	0.448646	0.360652	0	1	2.46745	1.65191	0	1	0.00826153	0.00618638	0	0	0.995848	1.16885	0	0	0.522544	0.595604	0	0	0.779892	0.784306	0	0
20/8/2015	0.580333	0.220632	0	0	3.3144	0.377817	1	1	0.294751	0.287984	0	0	24.5533	7.01499	0	3	0.459319	0.357932	0	0	2.2777	2.01863	0	1	0.0101276	0.00569216	0	0	1.01795	1.1778	0	0	0.510576	0.609486	0	0	0.784935	0.78359	0	0
21/8/2015	0.36488	0.368887	0	1	3.88887	0.364557	0	1	0.439577	0.269329	0	1	22.0372	10.4552	0	2	0.367311	0.361804	0	1	2.08553	2.16675	0	1	0.011868	0.00943524	0	0	1.00356	1.17089	0	0	0.504338	0.589187	0	0	0.797921	0.821197	0	0
22/8/2015	0.440154	0.19034	0	0	3.56262	1.54196	0	0	0.441559	0.313078	0	0	18.0218	6.35745	2	2	0.369634	0.337259	0	0	2.14428	1.9151	0	1	0.0122863	0.00976066	0	0	0.905461	1.11253	0	0	0.51583	0.586482	0	0	0.80431	0.886353	0	0
23/8/2015	0.471181	0.209626	0	0	3.10612	1.28123	0	1	0.45354	0.285159	0	0	18.2347	8.49766	1	2	0.212103	0.273146	0	0	2.52175	1.94465	0	1	0.0128247	0.0100639	0	0	0.811856	1.11855	0	0	0.56276	0.707228	0	0	0.82443	0.935325	0	0
24/8/2015	0.418756	0.205803	0	0	3.68187	1.05156	0	0	0.619217	0.242203	0	0	18.2453	3.87839	1	2	0.235841	0.264212	0	0	1.99598	1.97414	1	1	0.0137298	0.0127739	0	0	0.807881	1.23312	0	0	0.645086	0.683966	0	0	0.842382	0.920076	0	0
25/8/2015	0.434302	0.253266	0	0	3.72853	0.767281	0	1	0.586604	0.262544	0	0	20.9934	3.42677	0	3	0.373171	0.256162	1	0	1.91587	2.39546	0	0	0.0142771	0.0145877	0	0	0.826938	1.21722	0	0	0.699352	0.580579	0	0	0.773237	0.919462	0	0
26/8/2015	0.390685	0.229216	0	0	3.69576	0.737218	0	1	0.573908	0.256045	1	0	22.6368	3.9913	0	3	0.306206	0.26908	0	0	2.08008	2.40702	1	0	0.0151053	0.0157438	0	0	0.843448	1.23393	0	0	0.735554	0.664998	0	0	0.845802	0.928614	0	0
27/8/2015	0.33907	0.2001	0	0	2.8047	0.743209	0	1	0.62978	0.232819	1	0	23.1433	5.51452	2	1	0.299936	0.279749	0	0	2.3877	2.50342	0	0	0.0203287	0.017719	0	0	0.798702	1.13654	0	0	0.751658	0.636814	0	0	0.867579	0.894988	0	0
28/8/2015	0.376581	0.253419	0	0	2.94993	0.605604	0	1	0.738935	0.145143	1	0	25.6005	9.52297	0	1	0.294993	0.227717	1	0	2.32474	2.46677	0	0	0.0223856	0.0185753	0	0	0.87915	1.01123	0	0	0.858667	0.804534	0	0	0.796577	0.903374	0	0
29/8/2015	0.359683	0.212779	0	1	2.11104	0.237903	0	1	0.346341	0.142175	1	0	24.4478	13.3102	1	2	0.307647	0.222481	0	0	2.39229	2.43112	1	0	0.0340155	0.023362	0	0	0.90029	0.92368	0	0	0.881059	0.801128	0	0	0.813335	0.919084	0	0
30/8/2015	0.336405	0.233149	0	0	1.61863	0.267671	1	0	0.342466	0.140475	0	0	24.4204	10.8691	0	1	0.346391	0.225913	0	0	2.7775	2.15725	0	0	0.0375945	0.0284237	0	0	0.792616	1.0601	0	0	0.823737	0.622531	0	0	0.759478	0.913769	0	0
31/8/2015	0.380572	0.53986	0	0	1.55039	0.332959	2	1	0.298282	0.132924	0	0	24.182	13.6151	1	0	0.370214	0.22499	0	1	2.5845	2.23573	0	0	0.0374986	0.025916	0	0	0.78327	1.09482	0	0	0.841125	0.571591	0	0	0.799024	0.912999	0	0
1/9/2015	0.490428	0.307594	0	0	1.741	0.452581	0	0	0.264513	0.127763	0	0	24.536	9.98831	1	1	0.378026	0.225141	0	1	2.63307	2.39612	0	0	0.0378585	0.0319474	0	0	0.744213	1.06634	0	0	0.846696	0.628747	0	0	0.810904	0.91085	0	0
2/9/2015	0.482734	0.352057	0	0	1.69438	0.411251	1	0	0.314749	0.123424	0	0	25.3835	13.7698	1	1	0.335014	0.213883	0	1	2.44128	2.36101	0	0	0.040093	0.0352875	0	0	0.736083	1.10577	0	0	0.83655	0.599919	0	0	0.907714	0.905702	0	0
3/9/2015	0.485407	0.312973	0	1	1.86605	0.396538	0	0	0.303699	0.108738	1	0	24.5056	18.5094	0	0	0.372368	0.213851	0	1	2.32253	2.39015	0	0	0.0457126	0.0364741	0	0	0.763379	0.992755	0	0	0.709368	0.557093	0	0	0.904188	0.882893	0	0
4/9/2015	0.465273	0.370187	0	0	1.66462	0.473243	0	0	0.341251	0.11459	0	0	22.1146	16.1405	1	0	0.357184	0.241872	0	0	2.43161	2.22232	0	0	0.0586115	0.0438541	0	0	0.75239	1.09055	0	1	0.733054	0.574226	0	0	0.898011	0.872504	0	0
5/9/2015	0.452824	0.31834	0	0	0.320194	0.496242	0	1	0.268113	0.12598	0	0	22.5736	12.2958	0	0	0.359535	0.231192	0	0	2.38897	2.24964	0	0	0.0709106	0.0494601	0	0	0.827676	1.02356	0	0	0.794471	0.540687	0	0	0.895882	0.85849	0	0
6/9/2015	1.21485	0.334395	0	0	0.327396	0.313307	0	3	0.216706	0.131319	0	0	24.0861	12.4692	0	0	0.351722	0.261786	0	0	2.41989	2.34085	0	0	0.0713834	0.0579798	0	0	0.927297	1.07933	0	0	0.774951	0.618758	0	0	0.908629	0.814213	0	0
7/9/2015	0.424002	0.324697	0	0	0.383445	0.402093	0	1	0.222195	0.186714	0	0	26.6585	12.726	1	1	0.350755	0.227238	0	0	2.49774	2.31347	0	0	0.0821041	0.0628682	0	0	0.928269	1.05142	0	0	0.681378	0.600292	0	0	0.842524	0.852259	0	0
8/9/2015	0.551612	0.512126	0	0	0.346743	0.393934	0	0	0.244929	0.21937	0	0	24.0092	13.1439	3	1	0.342448	0.220338	0	0	2.40522	2.2115	0	0	0.0904718	0.0639388	0	0	0.975215	1.00115	0	0	0.640814	0.61194	0	0	0.902454	0.84395	0	0
9/9/2015	0.702374	0.434217	0	0	0.33081	0.339039	0	1	0.301979	0.162349	0	1	30.5661	16.5388	1	0	0.338558	0.232334	0	0	2.48033	2.54857	0	0	0.100443	0.0675696	0	0	0.887225	1.19514	0	0	0.63333	0.742243	0	0	0.77766	0.824389	0	0
10/9/2015	0.534956	0.44534	1	0	0.281429	1.29011	1	1	0.289854	0.171072	0	0	23.2651	19.1899	1	0	0.32921	0.217398	0	0	2.34127	2.5116	0	0	0.103057	0.0676462	0	0	0.868203	1.23456	0	0	0.654494	0.73345	0	0	0.756894	0.857366	0	0
11/9/2015	0.37151	0.444237	1	0	0.373552	0.63732	0	1	0.326088	0.147882	0	1	5.17243	14.3108	1	0	0.246198	0.226822	0	0	2.17025	2.24341	0	0	0.108973	0.0713397	0	0	1.0701	1.27062	0	0	0.64914	0.711921	0	0	0.740916	0.889372	0	0
12/9/2015	0.356802	0.452606	0	0	0.343278	0.581798	0	1	0.150835	0.109137	0	1	5.12726	14.6167	1	0	0.288725	0.216325	0	0	2.24692	2.26421	0	0	0.119145	0.0740378	0	0	1.11545	1.12598	0	0	0.65397	0.692459	0	0	0.772434	0.869141	0	0
13/9/2015	0.405789	0.322159	0	0	0.431685	0.776603	0	0	0.142416	0.120324	0	1	6.16115	16.7036	1	1	0.285424	0.202128	0	0	1.76198	2.35081	0	0	0.130675	0.0776558	0	0	0.906164	1.34461	1	0	0.623867	0.638744	0	0	0.720412	0.8068	0	0
14/9/2015	0.213789	0.302175	0	0	0.528025	0.627759	0	0	0.184687	0.259592	0	0	2.96438	18.6015	2	0	0.346124	0.210767	0	0	2.23045	2.19928	0	0	0.140806	0.086915	0	0	0.923573	1.30451	1	0	0.57235	0.640696	0	0	0.750641	0.753986	0	0
15/9/2015	0.205684	0.360936	0	0	0.4939	0.609706	0	0	0.187455	0.216024	0	0	3.47486	19.0803	3	0	0.328814	0.213261	0	0	2.32018	2.16492	0	0	0.149879	0.0937277	0	0	0.894184	1.09538	0	0	0.646683	0.675128	0	0	0.768134	0.803933	0	0
16/9/2015	0.215518	0.346373	0	0	1.38201	1.40166	0	0	0.1409	0.187029	0	0	16.9916	17.6467	2	0	0.343105	0.19433	0	0	2.6458	2.1848	0	0	0.15756	0.100537	0	0	1.17365	1.12218	0	0	0.544524	0.628153	0	0	0.760743	0.858824	0	0
17/9/2015	0.220965	0.354667	0	0	1.42683	1.66772	0	0	0.140305	0.255573	0	1	17.6503	19.9313	2	0	0.232759	0.174709	0	0	2.65935	1.63277	0	0	0.165102	0.110543	0	0	1.13945	1.14473	0	0	0.638018	0.781531	0	0	0.933379	0.866239	0	0
18/9/2015	0.266556	0.347568	0	0	1.48996	1.77907	0	0	0.147902	0.264237	0	0	19.1289	18.2417	2	0	0.243504	0.206959	0	0	2.46041	1.9292	0	0	0.169197	0.123193	0	0	1.15696	1.27083	0	0	0.592297	0.607083	0	0	0.924694	0.790857	0	0
19/9/2015	0.232849	0.335329	0	0	1.45107	1.51773	0	0	0.167477	0.256024	0	0	18.9488	9.59521	1	1	0.254499	0.226905	0	0	2.3616	1.83715	1	0	0.179658	0.135704	0	0	1.2838	1.19875	0	0	0.605542	0.571013	0	0	0.853041	0.761135	0	0
20/9/2015	0.279257	0.247434	0	0	1.46229	1.54087	0	0	0.248508	0.269655	0	0	18.3681	7.69651	2	1	0.259036	0.258906	0	0	2.18927	1.84045	0	0	0.191398	0.15009	0	0	1.27166	1.03684	0	0	0.545564	0.728681	0	0	0.831714	0.769324	0	0
21/9/2015	0.30134	0.353623	0	1	1.48173	1.34076	0	0	0.372274	0.16155	0	0	17.8962	9.11384	2	1	0.243611	0.230462	0	0	1.92927	1.69355	0	0	0.197911	0.170781	0	0	1.56005	1.36747	0	0	0.660392	0.618871	0	0	0.892678	0.797657	0	0
22/9/2015	0.297038	0.200885	0	1	1.35913	1.33598	0	0	0.368608	0.170619	0	0	17.6912	10.6483	2	1	0.243916	0.242208	0	0	2.61355	1.44205	0	0	0.206215	0.17554	0	0	1.55515	1.57352	0	0	0.632806	0.661149	0	0	0.91827	0.837632	0	0
23/9/2015	0.29666	0.379261	0	1	1.4063	1.23854	0	0	0.372142	0.182058	0	0	17.0662	15.8088	3	0	0.239446	0.240329	0	0	2.56993	1.48118	0	0	0.20601	0.179757	0	0	1.52386	1.69671	0	0	0.645734	0.685453	0	0	0.905976	0.832166	0	0
24/9/2015	0.365256	0.285755	0	0	1.34209	1.06585	0	0	0.358887	0.146682	0	0	18.7806	14.4591	2	0	0.248279	0.244057	0	0	2.56986	1.80048	0	0	0.216402	0.191414	0	0	1.48349	1.7066	0	0	0.659571	0.537816	0	1	0.749734	0.869976	0	0
25/9/2015	0.247458	0.352348	0	0	1.34103	1.20301	0	2	0.317077	0.137714	0	0	19.2943	14.8604	2	1	0.248949	0.237107	0	0	2.56913	2.06094	0	0	0.217109	0.208184	0	0	1.37813	1.79361	0	0	0.63288	0.537441	0	0	0.797877	0.942804	0	0
26/9/2015	0.325942	0.467206	1	0	1.31573	1.36369	0	0	0.319277	0.170268	0	0	23.709	15.5471	1	0	0.253442	0.221182	0	0	2.71652	2.09549	0	0	0.22492	0.216272	0	0	1.21548	1.24911	0	0	0.616876	0.561711	0	1	0.832537	0.908273	0	0
27/9/2015	0.395633	0.814585	1	0	0.443102	1.06126	0	0	0.259289	0.202573	0	0	22.952	23.3671	2	0	0.259829	0.22576	0	0	2.36103	1.90802	0	0	0.229369	0.223088	0	0	1.41032	1.19296	0	0	0.595108	0.557649	0	0	0.89679	0.88471	0	0
28/9/2015	0.286571	0.551514	0	0	0.324368	1.73444	0	0	0.33432	0.189627	0	0	22.6185	25.2047	0	0	0.333846	0.240353	0	0	2.20384	2.00878	0	0	0.231827	0.236348	0	0	1.33828	1.7731	0	0	0.555092	0.637315	0	0	0.900686	0.967205	0	0
29/9/2015	0.347917	0.3658	1	0	0.346117	2.03086	1	0	0.351066	0.170035	0	0	27.0554	21.5339	1	0	0.434106	0.251287	0	0	2.18037	1.98062	0	0	0.239965	0.206633	0	0	1.40873	2.50119	0	0	0.550269	0.581104	0	0	0.895526	0.96465	0	0
30/9/2015	0.328469	0.383785	1	0	0.325592	2.02465	1	0	0.348216	0.187138	0	0	26.5315	16.4833	1	0	0.434156	0.247576	0	0	2.27735	2.03225	0	0	0.256791	0.180112	0	0	1.57524	2.4235	0	0	0.43681	0.772589	0	0	0.872576	0.997713	0	0
1/10/2015	0.292691	0.382023	2	1	0.648904	2.56678	0	0	0.328465	0.186681	0	0	38.4263	34.7517	0	0	0.336452	0.266157	0	0	2.30783	1.76464	0	0	0.214644	0.147417	0	0	1.59624	1.5795	0	0	0.51468	0.676477	0	0	0.842386	1.0237	0	0
2/10/2015	0.40446	0.775554	0	0	0.452092	2.55019	1	0	0.310715	0.202478	0	0	21.0184	26.6562	0	0	0.354426	0.280198	0	0	2.3095	1.84083	0	0	0.225507	0.267959	0	0	1.2093	1.48296	1	0	0.443755	0.669908	0	0	0.818121	0.979149	0	0
3/10/2015	0.378973	0.323313	0	3	0.703082	2.60745	1	0	0.310028	0.444196	0	0	19.4451	20.0123	0	0	0.357293	0.281206	0	0	2.21498	1.85473	0	0	0.23538	0.27615	0	0	1.17411	1.62107	1	0	0.492539	0.610575	0	0	0.822216	0.970729	0	0
4/10/2015	0.406204	0.49957	0	1	0.778764	1.84975	1	0	0.248412	0.185179	0	0	22.2718	20.8641	1	0	0.366891	0.242235	0	0	2.37682	1.98825	0	0	0.236436	0.329086	0	0	1.18115	1.56299	0	0	0.559679	0.553116	0	0	0.829892	0.947353	0	0
5/10/2015	0.399527	0.517453	0	3	0.557462	2.81785	1	0	0.193872	0.182703	0	0	21.1744	34.9459	1	0	0.35551	0.253218	0	0	2.40433	2.19178	0	0	0.239812	0.335519	0	0	1.20968	1.4085	0	0	0.524299	0.510702	1	0	0.85663	0.915691	0	0
6/10/2015	0.420272	0.966014	0	0	0.405029	2.9966	1	0	0.188842	0.180592	0	0	19.6189	37.9843	1	0	0.368367	0.250054	0	0	2.23502	2.00342	0	1	0.251154	0.344795	0	0	1.2276	1.35935	0	0	0.539064	0.725794	1	0	0.852981	0.948177	0	0
7/10/2015	0.406182	0.842737	0	0	0.45155	3.12041	0	0	0.194891	0.175196	0	0	18.8197	33.4073	1	0	0.358796	0.258553	0	0	1.71437	2.01936	0	1	0.334251	0.305964	0	0	1.13831	1.30663	0	0	0.548549	0.672381	1	0	0.819906	0.983203	0	0
8/10/2015	0.374072	0.727516	0	0	0.480503	3.17602	0	0	0.189565	0.159048	0	0	20.9429	37.4025	1	0	0.356106	0.289928	0	0	2.08611	2.17677	0	0	0.330909	0.316302	0	0	1.32036	1.30313	0	0	0.50093	0.711206	0	0	0.831952	0.955685	0	0
9/10/2015	0.379276	0.813982	0	0	0.553755	3.13575	0	0	0.217886	0.163	0	0	20.1072	22.195	2	0	0.361676	0.238456	0	0	1.91649	2.54789	0	0	0.344693	0.282867	0	0	1.1866	1.44767	0	0	0.625597	0.491853	0	0	0.826059	1.02879	0	0
10/10/2015	0.363942	0.763395	0	0	1.94359	3.16832	0	0	0.238637	0.149022	0	1	21.1233	23.4695	1	0	0.285267	0.246671	0	0	2.27042	2.3242	0	0	0.342808	0.289245	0	0	1.33477	1.55811	0	0	0.462728	0.550815	0	0	0.81778	1.03212	0	0
11/10/2015	0.381839	0.745928	0	0	1.9213	3.2045	0	0	0.233305	0.368235	0	0	20.3827	29.3016	1	0	0.28532	0.346884	0	0	2.18007	2.52986	0	0	0.341255	0.247383	0	0	1.51099	2.29969	0	0	0.429188	0.504875	0	0	0.843871	1.08913	0	0
12/10/2015	0.419214	0.922141	0	0	1.84437	3.16927	1	0	0.20836	0.298481	0	0	20.9179	23.7955	0	0	0.266826	0.322356	0	0	1.90051	2.59715	1	0	0.350856	0.252316	0	0	1.30796	2.17698	0	0	0.731283	0.518129	0	0	0.836026	1.00746	0	0
13/10/2015	0.381317	0.769558	0	0	2.28274	3.19705	0	0	0.185627	0.468873	0	0	35.0129	49.1931	1	0	0.280888	0.309598	0	0	1.82336	3.33833	1	0	0.353987	0.252038	0	0	1.1746	1.91488	0	0	1.08101	0.540753	0	0	0.83708	1.01068	0	0
14/10/2015	0.669333	1.0683	0	0	1.79224	4.30948	0	0	0.204721	0.428105	0	0	55.4455	29.4784	2	0	0.286427	0.321092	0	0	1.88274	3.30019	1	0	0.317025	0.352484	0	0	1.22761	1.69356	0	0	1.0546	0.484932	0	1	0.868098	1.00137	0	0
15/10/2015	0.732134	1.31741	0	0	1.81872	4.24203	0	0	0.215604	0.58533	0	1	59.3898	69.1328	1	0	0.24442	0.386078	0	0	2.3497	3.41858	0	0	0.324174	0.38471	0	0	1.20657	1.64679	0	0	0.526072	0.952923	0	0	0.865184	0.998331	0	0
16/10/2015	1.11028	0.77188	1	0	1.82749	3.7842	0	0	0.197117	0.583444	1	0	55.8607	33.1813	1	0	0.374377	0.498725	0	0	2.58496	8.56315	0	0	0.244175	0.378596	0	0	1.29538	1.72395	0	0	0.909661	1.02704	0	0	0.875766	0.928762	0	0
17/10/2015	0.47854	1.13634	0	0	2.23307	3.98402	2	0	0.191811	0.54589	0	0	58.5311	35.2538	1	0	0.295459	0.476851	0	0	2.43966	3.80532	0	0	0.209814	0.401579	0	0	1.56059	1.79457	0	0	0.916723	0.896564	0	0	0.878569	0.839858	0	0
18/10/2015	0.996845	1.1013	1	0	2.9298	4.0676	1	0	0.190247	0.331554	0	0	37.7608	49.2327	1	0	0.289656	0.558688	0	0	2.59685	3.55132	0	0	0.223228	0.406418	0	0	1.61187	1.75674	0	0	1.19174	0.721613	0	0	0.861129	0.836064	0	0
19/10/2015	0.835532	1.13724	1	0	3.13614	4.18444	2	0	0.380189	0.534622	0	1	30.2325	51.736	1	0	0.272477	0.555578	0	0	2.79157	2.60016	0	1	0.390745	0.405615	0	0	1.63787	1.85881	0	0	1.27538	0.600611	0	0	0.912022	0.873838	0	0
20/10/2015	0.873059	1.19355	0	0	2.79419	4.5028	1	0	0.20835	0.599386	0	0	33.6291	54.5069	1	0	0.309255	0.592105	0	0	2.96625	3.52006	0	0	0.35567	0.398571	0	0	1.75311	2.09581	0	0	1.06948	0.487944	0	1	0.915271	0.872792	0	0
21/10/2015	1.2273	1.1146	0	0	3.53551	4.47794	1	0	0.243301	0.52566	0	0	51.0627	53.366	0	0	0.273752	0.593011	0	0	2.76441	3.59343	0	0	0.432429	0.423953	0	0	1.74279	1.83901	0	0	0.955345	0.699292	0	1	0.933124	0.888254	0	0
22/10/2015	1.30558	1.07655	1	0	3.56633	4.37047	1	0	0.415251	0.51671	0	0	50.194	55.2547	0	0	0.192773	0.437095	2	0	2.89528	3.97985	0	0	0.396761	0.42254	0	0	1.87313	1.62101	0	1	1.09935	0.721789	0	0	0.982205	0.935363	0	0
23/10/2015	0.977909	1.42009	1	0	3.48805	4.51294	1	0	0.201305	0.567201	0	0	38.8886	54.8989	0	0	0.369027	0.362113	0	0	3.24312	4.18631	0	0	0.458543	0.489899	0	0	1.79202	1.80212	0	0	1.15379	0.821261	0	0	0.962923	0.922772	0	0
24/10/2015	1.11064	1.56042	0	0	3.53938	4.42964	1	0	0.228366	0.457044	0	0	49.8575	50.1705	0	0	0.372942	0.376615	0	0	3.00591	6.20616	0	0	0.373962	0.49294	0	0	1.93853	1.94924	0	0	1.21345	0.754763	0	0	0.984514	0.894923	0	1
25/10/2015	0.556118	1.49146	0	0	3.6805	4.25121	0	0	0.359847	0.412921	0	0	42.557	54.4573	0	0	0.486357	0.396388	0	0	2.91946	5.7889	0	0	0.431962	0.365825	0	0	1.98282	2.09576	0	0	1.12564	0.604913	0	0	0.994834	0.900997	0	0
26/10/2015	0.655898	1.50983	1	0	3.46206	3.83224	0	0	0.397572	0.4627	0	0	42.1787	61.3776	0	0	0.476548	0.416729	0	0	3.5251	6.57575	0	0	0.494748	0.393768	0	0	2.02007	2.12909	0	0	0.940044	0.60562	0	1	1.00532	1.07587	0	1
27/10/2015	1.17645	0.544989	0	0	3.76854	3.83968	0	0	0.325414	0.477001	0	0	41.3139	50.5946	0	0	0.565189	0.396758	0	0	3.84517	4.50909	0	0	0.49413	0.399045	0	1	1.72957	2.17525	1	0	1.17564	0.885904	0	1	1.03239	0.876944	0	1
28/10/2015	0.590987	1.31559	0	0	3.53041	4.38388	0	0	0.324095	0.386912	0	0	42.0961	51.7121	0	0	0.618265	0.419412	0	0	4.62569	4.17731	0	0	0.496367	0.399526	0	1	1.36756	2.0344	0	0	1.27465	0.88692	0	0	1.05717	0.91353	0	0
29/10/2015	0.656894	1.33778	0	0	3.69024	3.45488	0	0	0.498385	0.561624	0	0	43.7259	58.4312	0	0	0.524876	0.394958	0	0	4.44883	4.80706	0	0	0.513501	0.397614	0	1	1.84014	2.00995	0	0	1.10296	0.981836	0	0	1.09532	1.01065	0	0
30/10/2015	0.854331	0.774733	0	0	3.94647	3.98244	0	0	0.40075	0.501405	0	0	43.0729	48.5379	0	0	0.589679	0.864442	0	0	5.30483	5.92745	0	0	0.509372	0.469343	0	1	1.34371	2.32861	1	0	1.34059	0.95262	0	0	1.05833	1.01018	0	0
31/10/2015	0.659202	0.504857	0	0	3.79999	3.76926	1	0	0.407779	0.678639	0	0	53.4714	44.1258	0	0	0.579991	0.920177	0	1	5.23747	5.36119	0	0	0.501858	0.466667	0	1	1.5174	2.05468	0	0	1.15986	0.870921	0	0	1.01933	1.01603	0	0
1/11/2015	0.622988	0.936709	0	0	3.62351	3.92466	0	0	0.315878	1.02745	0	0	53.9789	31.0167	0	0	0.653523	0.337164	0	2	4.32796	7.66647	0	0	0.489014	0.442292	0	1	1.26345	1.89319	1	0	1.60303	0.96954	1	0	1.02186	0.996744	0	0
2/11/2015	0.625879	1.06132	0	0	3.94065	3.87971	0	0	0.295974	1.06866	0	0	67.0216	36.7976	0	0	0.539212	0.627986	0	0	4.27202	4.39445	0	0	0.4763	0.388993	0	0	1.25242	1.71294	1	0	1.56443	1.08028	1	0	1.08629	1.05622	0	0
3/11/2015	0.593822	1.58836	0	1	4.03939	3.34818	0	0	0.324385	1.42142	0	0	62.784	36.8561	0	0	0.561719	0.433584	1	0	4.47667	5.2053	0	0	0.476225	0.451558	0	0	1.28132	1.96653	0	0	1.57677	0.819964	1	0	1.09575	0.994689	0	0
4/11/2015	0.633545	0.956275	0	0	3.94349	3.16292	0	0	0.438446	1.05584	0	0	71.6193	29.8369	0	0	0.581567	0.906771	1	0	3.58529	4.60487	0	0	0.383153	0.437881	1	0	1.34003	1.75497	0	0	1.48743	0.86832	1	0	1.03668	1.00636	0	0
5/11/2015	0.839843	0.813935	0	0	2.51601	4.30013	0	0	0.43914	1.3088	0	0	60.5405	33.8402	0	0	0.603219	1.18982	1	0	3.97578	4.30472	0	0	0.387733	0.500318	1	0	1.29594	1.74904	0	0	1.3557	0.908812	0	0	1.0328	1.11965	0	0
6/11/2015	1.02688	1.11395	0	0	2.50099	3.80091	0	0	0.423317	1.22066	0	0	56.9753	29.0344	0	0	0.692242	1.10346	0	0	6.51384	4.36074	1	0	0.372083	0.4905	1	0	1.41141	1.9881	0	0	1.3082	0.857746	0	0	1.0422	0.91118	0	0
7/11/2015	0.755096	0.908505	0	1	2.46008	4.76886	0	0	0.4455	1.28822	0	0	57.3648	26.8188	0	1	0.707171	1.09881	0	0	6.10281	3.58868	0	0	0.373666	0.514282	1	0	1.50872	1.95224	0	0	1.2494	0.69525	0	1	1.06988	0.929499	0	0
8/11/2015	0.812538	0.903676	0	1	2.83614	4.48219	0	0	0.602102	1.36904	0	1	58.2934	28.6097	0	0	0.725589	1.16224	0	0	2.57627	4.08445	2	0	0.390453	0.547498	1	0	1.43935	1.87066	0	0	1.24453	0.653816	0	1	1.06724	0.993351	0	0
9/11/2015	1.014	1.08057	0	0	3.62315	3.85112	0	0	0.611571	1.50358	0	0	52.2822	29.2385	0	0	0.63718	1.32936	0	0	3.39493	3.22817	1	0	0.398686	0.533757	1	0	1.37791	1.78916	1	0	1.25788	0.748812	0	1	1.07535	0.915521	0	0
10/11/2015	0.503833	1.29086	1	0	6.3618	6.82898	0	0	0.5672	1.49506	1	0	53.1241	42.8889	0	2	0.631983	1.30816	0	0	4.93246	6.1473	1	0	0.418707	0.524054	1	0	1.52305	1.79628	1	0	1.22261	0.599555	0	1	0.996823	0.909561	0	0
11/11/2015	0.485513	0.89817	1	0	7.14806	6.74385	0	0	0.593199	1.07971	1	0	66.0176	37.9953	0	1	1.05582	1.49205	0	0	4.79639	6.19907	1	0	0.422675	0.460781	2	0	1.75054	1.50941	1	0	0.944356	0.953954	0	0	1.01512	0.976733	0	1
12/11/2015	2.26029	0.917879	0	0	7.54213	6.7979	0	0	0.88826	1.1962	2	0	68.8222	36.2664	0	2	0.707124	1.44883	0	0	6.15457	6.35922	1	0	0.401182	0.455185	2	0	1.64146	1.64008	1	0	1.27078	0.920828	0	0	1.01205	0.92389	0	1
13/11/2015	2.71663	0.972717	0	0	7.80947	6.23428	0	0	1.09334	1.16195	1	0	88.1622	35.6241	0	1	0.955026	1.20473	0	0	6.29749	6.89734	0	0	0.669952	0.460937	1	1	1.63551	1.68687	0	0	1.11763	1.03637	0	0	0.972503	0.925336	0	0
14/11/2015	2.51386	0.96694	0	0	6.97487	5.73851	0	0	1.3713	0.991273	1	1	71.1094	33.6794	0	2	1.08491	1.4216	0	0	6.22665	7.29795	0	0	0.675428	0.456157	1	1	1.60055	1.79138	0	0	1.10588	1.04851	0	0	0.912822	1.00393	0	0
15/11/2015	2.43552	0.748232	0	1	3.84193	6.11806	0	0	1.42125	0.91343	1	0	63.7898	29.7833	0	2	1.02915	1.4234	0	0	6.91245	8.53712	0	0	0.432077	0.465005	0	1	1.53228	1.62011	0	1	1.00054	1.0383	0	0	1.30353	1.02107	0	0
16/11/2015	2.14446	0.673467	0	0	3.6926	6.77191	0	0	1.88487	1.26201	1	1	63.137	24.3355	0	2	1.05653	1.78487	0	0	6.74392	8.36529	1	0	0.475117	0.447683	0	1	1.88234	1.51146	0	1	1.07292	0.880655	0	0	1.01348	1.00305	0	0
17/11/2015	1.67233	1.35095	0	0	3.02448	5.50928	0	0	1.15905	1.28299	1	0	76.5651	32.6885	0	0	1.58022	1.57146	0	0	5.90625	9.44633	0	0	0.506311	0.486197	0	1	1.96959	1.54518	0	1	0.927062	0.871065	0	1	1.11032	1.03576	0	0
18/11/2015	1.84756	1.33745	0	0	4.10374	6.00501	0	0	0.97164	1.26563	1	1	86.476	23.796	0	1	1.48701	1.5036	0	0	5.95158	8.99642	0	0	0.548506	0.471648	0	1	1.59271	1.28804	0	1	0.823206	1.00614	0	0	1.09316	1.03098	0	0
19/11/2015	1.94487	0.8141	0	1	4.48096	4.53187	0	0	0.926877	1.23755	1	1	66.2112	31.2625	0	1	1.49816	1.74753	0	0	6.12365	6.61045	0	0	0.552858	0.576419	0	1	1.52101	1.14528	0	1	0.904772	1.02336	0	0	1.04618	1.04631	0	0
20/11/2015	2.4124	0.868072	0	0	7.24199	6.55232	0	0	1.03072	1.36027	1	1	64.0075	40.9765	0	1	1.10166	1.79969	0	0	6.23795	5.7925	0	0	0.516352	0.585492	0	1	1.64388	1.23242	0	1	0.657658	0.983824	1	0	1.01608	1.0633	0	0
21/11/2015	3.09623	0.732868	0	1	6.42696	5.54556	0	0	1.05055	0.965887	0	0	67.137	29.1094	0	3	1.26116	1.4491	0	0	5.51804	4.06302	0	0	0.507825	0.588308	0	1	1.68529	1.11258	0	0	0.911233	1.1631	0	0	0.980872	0.965884	0	0
22/11/2015	2.25111	0.792348	1	0	6.23329	5.44423	1	0	1.18798	0.707921	0	0	44.2446	36.5732	0	1	1.25975	1.87408	0	0	4.63748	3.38088	0	0	0.502527	0.585783	0	1	1.7746	1.61856	0	0	1.0241	0.992045	0	0	0.971913	0.947762	0	0
23/11/2015	1.80687	0.878327	1	1	5.92174	5.70269	1	0	1.38029	0.603459	0	0	48.3499	38.5652	0	1	1.14268	1.85037	0	0	3.92219	3.06354	0	0	0.564218	0.582374	0	1	1.71953	1.5266	0	0	0.979365	0.851171	0	0	0.934949	0.94011	0	0
24/11/2015	1.57347	1.83656	0	0	6.09937	5.33763	0	0	1.1597	0.746081	0	0	45.0179	41.6106	0	1	1.02108	1.62723	0	0	3.3386	3.49997	0	0	0.601216	0.55642	1	1	1.49416	1.67296	0	0	0.701057	0.816184	0	0	0.986527	0.986903	0	0
25/11/2015	1.16148	1.30419	0	0	6.1784	5.0601	0	0	0.905221	0.717167	0	0	45.4412	34.1198	1	1	1.10392	1.79114	0	0	3.69685	2.25801	0	1	0.559519	0.48482	1	1	1.52986	1.64095	1	0	0.607478	0.936389	0	0	0.952074	0.989613	0	0
26/11/2015	1.35101	1.55685	0	0	6.38304	5.18677	0	0	1.03618	0.833291	0	0	40.9407	31.7697	1	0	1.02267	1.39622	0	0	3.88198	2.13549	0	1	0.545918	0.577229	1	0	1.77601	1.51375	0	0	0.61626	0.857833	1	0	1.10772	0.991814	0	0
27/11/2015	1.63466	0.555435	1	1	6.42188	5.26374	0	0	1.16864	0.962243	0	0	48.7348	33.3626	1	0	0.925051	1.48801	0	0	6.74981	2.74718	0	1	0.542144	0.560715	1	0	1.94402	1.71246	0	0	0.607751	0.90463	1	0	1.03703	1.00986	0	0
28/11/2015	0.880316	0.933654	1	0	7.40366	4.81523	0	0	1.28661	2.68217	0	0	37.1271	32.6008	0	0	1.09479	1.40812	0	0	5.29961	3.76022	0	0	0.757774	0.619667	1	0	1.82476	1.72025	0	0	0.805935	0.828221	0	0	1.08468	1.15413	0	0
29/11/2015	1.35198	0.860615	0	0	7.21844	5.36933	0	0	1.15441	2.3101	0	1	39.4817	29.2463	0	1	1.36589	1.47956	0	1	5.21473	3.25382	0	0	0.751106	0.62086	1	0	2.19544	2.23624	0	0	0.751024	0.767195	0	0	1.03456	1.15802	0	0
30/11/2015	4.42541	1.04986	0	0	6.75901	3.95797	0	0	2.21146	2.16683	0	2	73.2072	36.3749	0	0	1.47161	1.89237	0	1	5.88442	3.51871	0	0	0.741429	0.677185	1	0	2.43339	1.85692	0	0	0.742382	0.650194	0	0	1.16256	1.17435	0	0
1/12/2015	1.74449	0.987533	1	0	6.82597	4.04213	0	0	3.03127	2.5506	0	1	45.1783	37.6799	0	1	1.53353	1.88886	1	0	6.11472	3.6285	0	0	0.765557	0.662667	1	0	2.54015	1.98817	0	0	0.842289	0.651653	0	0	1.19323	1.24163	0	0
2/12/2015	1.57173	0.934915	1	0	7.0818	3.99851	0	0	2.86777	2.21043	0	2	47.3934	26.1575	0	1	1.94623	1.75571	0	0	5.70542	4.74953	0	1	0.811013	0.625955	1	0	2.17582	1.48993	0	0	0.970011	0.625974	0	1	1.30292	1.17584	0	0
3/12/2015	1.0297	1.38059	3	0	6.60142	3.81945	0	0	2.71954	1.34618	0	1	50.5925	38.7182	0	2	2.02071	1.82871	0	0	6.54728	5.11012	0	1	0.749225	0.62119	1	0	2.39845	1.46508	0	0	1.10096	0.470917	0	1	1.54237	1.17803	0	0
4/12/2015	0.893923	1.76301	2	0	6.86914	4.0031	0	0	2.47412	0.934878	1	2	42.141	37.821	0	2	2.33293	1.8316	0	0	6.11595	4.61689	1	1	0.829804	0.653599	0	0	1.93444	1.60537	0	0	0.935404	0.531351	1	1	1.75191	1.08432	0	0
5/12/2015	1.79963	1.97193	1	0	7.38108	4.26895	0	0	2.55967	1.39477	0	1	44.1616	39.3249	0	2	2.29475	1.62967	0	0	6.35388	5.34933	2	0	0.84352	0.660577	0	0	1.92593	1.67972	0	0	1.2787	0.721931	0	0	1.58309	1.0144	0	0
6/12/2015	2.47192	1.59568	0	0	10.1343	4.39876	0	0	2.44277	1.21778	1	1	63.6487	34.1346	0	1	2.29819	1.81622	0	0	8.14702	4.59123	0	1	0.894725	0.570525	0	0	1.73678	1.69629	0	0	1.19604	0.743037	0	0	1.63034	1.0581	0	0
7/12/2015	1.4688	1.90259	2	0	8.69842	4.30767	0	0	2.23276	1.27542	2	2	51.5721	37.1399	0	1	2.38092	1.68666	0	0	7.05013	5.22272	1	0	0.891155	0.624884	0	0	2.22344	1.76147	0	0	1.17589	0.986598	1	0	1.52901	1.05017	0	0
8/12/2015	1.91224	2.24085	2	0	9.74882	3.34375	0	0	2.22484	1.33774	2	1	54.4755	48.5543	0	1	2.39431	1.78993	0	0	9.90221	4.89735	1	0	0.949668	0.687862	0	0	2.61875	1.47198	0	0	1.1316	0.914626	2	0	1.53271	1.02612	0	0
9/12/2015	2.85806	2.78701	1	0	11.7314	5.09125	0	1	2.99494	1.674	0	1	59.7072	51.8765	0	1	2.43659	2.05079	0	0	12.5128	5.831	1	0	0.789838	0.7219	0	0	2.85329	1.54955	0	0	1.31951	1.02502	1	1	1.27555	1.16973	0	0
10/12/2015	1.74216	1.88496	1	0	10.5547	4.76022	0	1	3.10803	1.52325	0	1	46.8838	34.3153	0	1	2.40197	2.11085	0	0	14.1726	7.24092	0	0	0.793726	0.727917	0	0	2.96438	1.46885	0	1	1.75637	0.921504	1	0	1.30228	1.19013	0	0
11/12/2015	1.60337	2.21431	2	0	9.30796	4.14167	1	0	3.2917	0.898823	0	2	48.8198	35.2719	0	2	2.1764	1.96795	0	0	20.8601	6.65156	0	0	0.794682	0.74116	0	0	2.89391	1.35469	0	0	1.29062	1.32795	1	1	1.29911	1.23506	0	0
12/12/2015	1.53973	1.92549	2	0	8.97073	4.23882	0	0	3.22556	1.20711	0	1	44.8847	26.189	0	1	2.33072	1.83366	0	0	20.0059	6.60084	0	0	0.789594	0.689077	0	0	2.2592	1.26549	0	0	1.82769	1.11192	1	1	1.29781	1.18765	0	0
13/12/2015	3.9246	1.53099	2	0	8.31763	4.00023	0	1	3.09873	1.45143	0	1	42.5531	20.7621	0	1	2.32298	2.00706	0	0	21.2543	6.3453	0	0	0.792054	0.710079	0	0	2.0151	1.57001	0	0	1.42713	1.10318	0	0	1.42762	1.17158	0	0
14/12/2015	1.54206	1.87197	1	0	9.3978	6.92673	0	0	2.7541	3.05579	1	1	39.1949	27.5958	0	1	2.77118	1.77573	1	0	20.5172	8.38365	0	0	0.952712	0.713935	0	0	2.10141	1.49837	0	0	1.51669	1.2357	0	0	1.37644	1.16227	0	0
15/12/2015	1.38207	2.1106	1	0	9.05848	5.74502	0	1	2.82165	2.95856	0	1	37.2006	26.3219	0	1	2.30961	1.94335	0	0	11.0629	8.4901	1	0	0.95396	0.746055	0	0	1.91002	1.65379	0	0	1.6745	1.43783	0	0	1.25007	1.18521	0	0
16/12/2015	1.44022	1.81435	1	0	8.97564	6.33222	0	1	2.83765	3.2385	0	1	33.9881	25.375	1	1	3.43536	2.88881	0	0	13.7622	9.1126	1	0	0.954196	0.746094	0	0	1.83104	2.02576	1	0	1.88241	1.37405	0	0	1.24064	1.17595	0	0
17/12/2015	1.47461	1.73285	1	0	8.63025	6.32136	0	1	2.74894	3.16529	0	0	30.4964	20.4482	1	0	3.29536	2.95924	0	0	10.2817	12.3094	0	0	0.934454	0.753059	0	0	2.59052	2.142	0	0	1.67144	1.45295	0	0	1.23335	1.1936	0	0
18/12/2015	1.47815	1.26098	1	0	9.94893	6.50238	0	0	2.69999	3.19225	1	0	28.7836	18.3419	0	0	3.25126	2.93268	0	0	10.8324	15.3715	0	0	0.920124	0.737236	0	0	3.33352	1.92919	0	0	2.15666	1.13482	0	0	1.1992	1.15416	0	0
19/12/2015	1.37454	1.5501	1	0	9.85093	6.38344	0	0	2.73664	3.36558	1	0	30.0727	23.2306	0	0	3.30489	3.30494	0	0	9.37349	17.7847	0	0	0.750787	0.737353	0	0	1.70631	1.84649	0	0	2.15066	1.27724	0	0	1.21662	1.14768	0	0
20/12/2015	1.52786	1.49486	1	0	9.06193	8.22759	0	0	2.94049	3.56241	1	0	28.933	20.4868	0	0	3.2566	3.17681	0	0	9.18666	12.7265	0	0	0.730683	0.75082	0	0	1.80035	1.80385	0	0	2.10646	1.27132	0	0	1.33988	1.12063	0	0
21/12/2015	1.65041	1.27871	1	0	10.1978	6.82094	0	0	2.85306	3.40017	1	0	30.5923	31.8748	0	0	2.89661	3.34939	0	0	9.37718	10.4785	0	0	0.710968	0.748371	0	0	1.88591	1.89642	0	0	2.19988	1.46877	0	0	1.1255	0.983751	0	0
22/12/2015	1.54686	1.21401	1	0	8.4878	6.1284	0	0	2.84313	3.85804	1	0	39.0636	28.7628	0	0	2.66625	3.16576	0	0	8.61964	16.1268	0	0	0.709607	0.753953	0	0	2.11124	1.85381	0	0	1.86995	1.25783	0	0	1.09033	0.985428	0	0
23/12/2015	1.51931	1.20473	0	0	7.32654	6.76239	0	0	2.73423	3.87347	0	0	36.5727	26.4067	0	1	2.80177	3.04772	0	0	9.61623	11.0352	0	0	0.707558	0.753569	0	0	2.22246	1.80684	0	0	1.61736	1.09935	1	0	1.03265	1.06105	0	0
24/12/2015	3.53029	1.42226	0	0	9.40719	7.02634	0	0	2.85241	5.12289	0	0	33.5438	22.1289	0	0	3.45453	2.9077	0	0	8.98109	10.532	1	0	0.710684	0.744234	0	0	2.11885	1.48835	0	0	1.50862	0.691448	1	0	1.04885	1.04985	0	0
25/12/2015	5.91967	1.37498	0	0	9.88183	7.39773	0	0	2.86603	3.7941	1	0	28.3697	23.4758	0	0	3.23251	2.83098	0	0	9.22318	7.65534	0	1	0.728248	0.736946	0	0	2.12178	1.59593	0	0	1.71054	0.660732	0	0	1.05992	1.0343	0	0
26/12/2015	6.95298	1.10288	0	0	9.75947	4.68492	0	0	2.75817	2.63589	1	0	42.149	23.4791	0	0	3.67335	2.98956	0	0	10.8822	13.1271	0	1	0.729311	0.796819	0	0	2.46756	1.41794	0	0	1.4361	0.608047	0	0	1.11977	1.00096	0	0
27/12/2015	7.20318	1.6728	0	0	10.2714	5.87838	0	0	3.6847	2.33359	0	0	22.8779	25.7998	2	0	3.96871	2.98722	0	0	10.5846	14.03	0	0	0.769679	0.819031	0	0	3.3273	1.16492	0	0	1.62239	1.25417	0	0	1.16464	1.13529	0	0
28/12/2015	2.5436	1.30209	0	0	10.4505	5.9262	0	0	4.80937	2.27935	0	1	20.0955	20.1012	0	1	3.93725	3.37675	0	0	16.6353	7.03145	0	0	0.768414	0.828871	0	0	3.35823	1.30112	0	0	1.71376	1.04787	0	0	1.27774	1.12933	0	0
29/12/2015	6.03002	0.923532	0	1	10.9681	5.87847	0	0	4.44929	2.1302	1	1	24.7171	22.4813	0	0	3.62062	3.27122	0	0	13.1077	6.24427	1	0	0.786742	0.833179	0	0	3.53609	1.28804	0	0	1.44383	1.00766	0	0	1.30194	1.16428	0	0
30/12/2015	6.90041	0.971959	0	0	9.1341	6.656	0	0	5.68053	2.65637	1	1	23.5817	21.7101	0	0	3.26636	3.50005	0	0	14.5653	7.54252	1	0	0.73267	0.842636	0	0	2.46685	1.35562	0	0	1.27964	1.1012	1	0	1.14459	1.16437	0	0
31/12/2015	1.63735	1.63488	0	0	6.37607	6.27849	1	0	6.08918	3.22052	0	0	30.0795	33.0096	0	0	2.95886	2.62961	0	0	10.5587	5.43919	0	0	0.758132	0.845047	0	0	2.31526	1.39271	0	0	1.22567	1.09594	0	0	1.17145	1.15394	0	0
1/1/2016	1.80776	0.855849	0	0	5.38015	6.92684	0	0	4.67566	2.3408	1	0	29.0458	17.3106	0	0	2.67058	3.18262	0	0	8.43402	5.72341	0	0	0.793967	0.846048	0	0	2.05376	1.57698	0	0	1.23138	1.44799	0	0	1.21154	1.13994	0	0
2/1/2016	6.19398	0.786264	0	0	7.92835	5.89948	0	0	5.13385	2.44638	0	0	27.5296	23.2575	1	0	2.71102	2.93366	0	1	9.83551	8.51768	0	0	0.79534	0.852602	0	0	2.7152	1.43152	0	0	1.44242	1.57543	0	0	1.16379	1.14404	0	0
3/1/2016	2.93025	2.08379	0	0	7.69193	8.21826	0	0	5.17973	2.96726	0	2	28.577	44.1266	0	0	2.77112	3.36541	0	2	10.0981	8.33308	0	1	0.783267	0.878176	0	0	2.55201	1.86422	0	0	1.38728	1.85228	0	0	1.12318	1.05071	0	0
4/1/2016	1.6764	2.14582	0	0	7.25349	7.14224	0	0	5.30061	5.28382	0	1	21.3812	21.2875	1	0	2.87259	2.72932	0	1	5.47939	8.5182	0	0	0.781032	0.882369	0	0	2.7316	1.77326	0	0	1.59674	1.85466	0	0	1.18003	1.03356	0	0
5/1/2016	6.67409	1.55927	0	0	4.99264	7.43418	0	0	5.17149	5.29609	0	1	20.3903	26.6761	1	1	3.10925	2.81839	0	0	7.06435	9.79356	0	0	0.774096	0.878537	0	0	2.36237	1.74886	0	0	1.66123	2.02402	0	0	1.18911	1.01181	0	0
6/1/2016	1.88599	1.05194	0	0	7.55212	7.22972	0	0	5.52112	5.72483	0	0	21.2555	19.9828	1	0	3.02173	2.75477	0	0	5.7845	8.60472	0	0	0.779361	0.876578	0	0	2.12998	1.92842	0	0	1.69815	2.33455	0	0	1.16696	1.07966	0	0
7/1/2016	5.21077	1.17156	0	0	6.95891	7.69933	0	0	5.40873	5.44283	1	0	21.0347	19.5369	1	1	3.27904	2.70876	0	1	6.13334	5.92223	0	0	0.77407	0.879511	0	0	1.76274	1.87678	0	0	1.34869	2.03482	0	0	1.09073	1.07856	0	0
8/1/2016	2.31462	2.30629	0	0	7.38617	8.11028	0	1	5.38891	6.12042	2	0	22.5962	32.5709	0	0	3.10784	2.804	0	0	6.56753	13.1647	0	0	0.766563	0.869288	0	0	1.67034	2.21601	0	0	1.29515	2.00878	0	0	1.04834	0.998257	0	0
9/1/2016	4.98986	2.34388	0	0	7.23354	10.0366	0	0	5.94175	4.16677	0	0	24.4082	27.3144	0	0	3.01016	3.16349	0	0	9.1144	11.7999	0	1	0.763872	0.861122	0	0	2.27634	2.78433	0	0	1.28596	1.98034	0	0	1.06052	0.994295	0	0
10/1/2016	2.88778	1.80245	0	0	7.95363	9.26588	0	0	5.86498	2.65465	0	0	13.5765	28.0226	0	0	2.7543	4.2784	0	0	10.8747	8.90988	0	1	0.773016	0.864061	0	0	2.23769	2.63996	0	0	1.33057	1.61544	1	0	1.11332	0.959011	0	0
11/1/2016	2.0174	1.44859	0	0	8.50576	7.72856	0	0	4.41739	2.59556	0	0	17.1713	23.904	1	0	3.24629	4.4181	0	0	10.6148	11.696	0	0	0.784315	0.862951	0	0	1.56239	2.55497	0	0	0.775286	1.6576	0	0	1.10529	0.992725	0	0
12/1/2016	2.37451	1.48402	0	0	10.7191	6.69936	0	0	4.60388	2.42404	0	0	19.0066	24.9752	0	0	3.49374	4.22294	0	0	7.59802	13.0299	1	0	0.790138	0.868922	0	0	2.15015	2.86815	0	0	1.14147	1.22245	0	0	1.06032	0.990302	0	0
13/1/2016	2.08881	1.50467	0	0	9.77728	7.51216	0	0	3.31518	3.3021	0	0	16.2261	22.4805	1	2	3.77851	4.24072	0	0	8.42829	12.6161	1	0	0.80282	0.869742	0	0	1.36977	2.84377	0	0	0.927775	1.7794	0	0	1.06852	0.934819	0	0
14/1/2016	2.01326	1.66545	0	0	7.29489	7.31922	0	0	3.14766	3.30416	0	0	14.8988	23.0383	1	1	4.04442	4.37665	0	0	8.97625	13.0001	1	1	0.808908	0.87097	0	0	1.63113	2.93438	0	0	1.02329	1.44592	0	0	1.07094	0.971601	0	0
15/1/2016	2.7993	1.58538	0	0	6.9543	6.21393	0	0	3.77406	2.90453	0	0	13.9847	23.0726	0	0	4.34581	4.29534	0	0	9.08942	13.5209	0	0	0.821136	0.875961	0	0	1.59288	2.62994	0	0	1.37938	1.21792	0	0	1.08452	1.03505	0	0
16/1/2016	3.00644	1.74066	0	0	7.15737	6.77264	0	0	3.84391	1.86459	0	0	16.5891	23.998	0	0	3.62931	4.27748	0	0	10.9055	15.2067	0	0	0.858252	0.888172	0	0	1.59119	1.99589	0	0	1.44868	1.11533	0	0	1.14633	1.07468	0	0
17/1/2016	2.7024	1.66541	0	0	6.29733	6.62897	0	0	3.48882	1.89074	0	0	15.2602	21.5219	0	0	3.49261	4.14716	0	0	16.4938	12.4488	0	0	0.878303	0.880591	0	0	1.69432	1.8994	0	0	1.59065	1.28623	0	0	1.18741	1.13466	0	0
18/1/2016	3.99601	1.4581	0	1	5.38959	6.58115	0	0	3.8039	2.54595	0	0	15.865	21.5808	1	1	3.5691	3.742	0	0	19.0815	10.728	0	0	0.881326	0.899748	0	0	1.68557	3.21594	0	0	1.49475	1.11182	0	0	1.19033	1.06657	0	0
19/1/2016	2.61037	1.53144	0	1	4.94557	6.42673	0	0	4.2276	2.47231	0	0	18.875	21.7452	1	1	3.18995	4.50962	1	0	16.4221	9.98614	0	0	0.88964	0.904004	0	0	1.64952	3.29285	0	0	1.37343	1.06312	0	0	1.14347	1.09051	0	0
20/1/2016	1.34878	1.40875	1	1	4.13681	7.01105	0	0	3.22013	2.571	0	0	26.8712	46.7058	1	1	3.27627	4.00966	1	0	16.7715	9.52488	0	0	0.901137	0.896443	0	0	2.10226	3.28576	0	0	1.3597	1.03822	0	0	1.12069	1.04164	0	0
21/1/2016	2.67625	0.841707	0	1	4.02254	7.89375	0	0	2.91042	3.99898	0	0	18.277	20.9762	2	1	3.2151	3.66917	1	0	18.5534	9.18872	0	0	0.907158	0.894271	0	0	2.40232	1.73923	0	0	1.372	1.04791	0	0	1.06462	1.11011	0	0
22/1/2016	2.67605	0.600781	0	2	3.26685	6.80041	0	0	2.98945	3.95616	0	0	18.5227	21.1407	1	1	3.39687	3.39644	0	0	16.9762	9.06998	0	0	0.912562	0.901953	0	0	2.56116	1.66921	0	0	1.3336	1.31853	0	0	1.09249	1.14942	0	0
23/1/2016	1.55632	3.37426	0	1	3.51784	7.54442	1	0	2.71297	4.13472	0	0	19.1201	41.8689	2	1	3.36702	3.58659	1	0	24.1283	8.82841	0	0	0.91358	0.897417	0	0	2.50292	1.68635	0	0	1.62417	1.2999	0	0	1.06143	1.13329	0	0
24/1/2016	1.79557	0.937532	1	1	5.53334	6.77554	0	1	2.74673	3.98662	0	0	26.3276	20.5331	1	1	3.77289	3.33067	1	0	9.34896	8.82102	0	1	0.91697	0.89827	0	0	2.31789	3.00849	0	0	1.23293	1.51527	0	0	1.03005	1.09483	0	0
25/1/2016	3.12051	1.22658	0	1	6.67452	7.36244	0	0	3.98146	4.3697	0	0	24.3052	24.7528	3	1	3.86797	3.3581	1	0	7.5152	8.81698	0	0	0.920882	0.892155	0	0	2.12239	2.83538	0	0	1.06966	1.56458	0	0	1.04977	1.15292	0	0
26/1/2016	2.93594	1.75717	0	0	6.2871	5.68188	0	0	5.14773	3.83507	0	0	34.9073	22.3139	1	1	4.89932	3.34281	0	0	8.5594	11.036	0	0	0.927531	0.887438	0	0	1.83338	2.61946	0	0	1.12818	1.35529	0	0	1.01063	1.18369	0	0
27/1/2016	1.65726	1.60868	1	0	6.95091	5.64716	0	0	6.10161	4.6679	0	0	18.0083	21.7404	2	1	4.68743	3.70025	0	0	6.27834	10.2455	0	0	0.921466	0.88238	0	0	1.92281	2.13557	0	0	1.16848	1.86489	0	0	0.998645	1.16507	0	0
28/1/2016	1.12924	1.70409	1	0	5.40607	6.89441	1	0	6.64663	4.32263	1	0	18.496	46.4782	2	1	4.45979	3.8104	0	0	6.07979	10.3124	0	0	0.921489	0.884378	0	0	2.4316	2.14309	0	0	1.09768	1.6874	0	0	1.024	1.11272	0	0
29/1/2016	2.06885	5.01076	0	0	4.06569	5.15379	0	0	6.2054	4.34431	0	0	17.4554	64.0117	2	0	4.8577	4.2908	0	0	5.66721	12.25	0	0	0.921623	0.894261	0	0	2.47598	2.24822	0	0	1.64599	1.7527	0	0	1.07261	1.11819	0	0
30/1/2016	2.07721	1.63319	0	0	5.97519	5.98129	0	0	6.4335	3.80636	0	0	22.292	37.575	1	0	4.73015	4.33294	0	0	5.30402	10.905	0	0	0.920601	0.893283	0	0	3.4598	2.04757	0	0	1.54571	1.16159	0	0	1.04186	1.06623	0	0
31/1/2016	1.80207	1.90843	0	0	7.00117	5.76121	1	0	6.45998	3.8368	0	0	21.7408	32.6541	2	0	5.05726	4.20618	0	0	9.87687	10.139	0	0	0.922495	0.908415	0	0	1.60756	1.94702	0	0	1.28433	0.990239	0	0	1.04827	1.11541	0	0
1/2/2016	1.87984	1.49586	0	0	6.97594	5.33927	0	1	5.32928	3.44105	1	0	20.1359	31.1414	1	0	4.93756	4.25552	0	0	13.0974	9.84829	0	0	0.929673	0.908082	0	0	1.55624	2.26488	0	0	1.59602	0.879187	0	0	1.02439	1.02143	0	0
2/2/2016	2.06902	1.87424	0	0	7.78925	4.73982	0	0	5.32053	2.97297	0	0	21.6484	23.4336	2	1	4.98709	4.52019	0	0	16.4819	9.99941	0	1	0.926474	0.885393	0	0	1.8422	2.11271	0	0	1.46821	0.938283	0	0	1.03444	1.07214	0	0
3/2/2016	1.33494	2.60223	0	0	8.11036	3.82504	0	0	5.338	2.19546	0	0	20.3452	26.0137	1	1	5.84599	4.73601	0	0	15.4473	12.0203	0	2	0.918887	0.906017	0	0	1.85646	2.19811	1	0	1.65346	1.49518	0	0	1.05846	1.01474	0	0
4/2/2016	1.68207	2.18344	0	0	8.36653	3.84017	0	1	4.44037	2.13738	1	0	20.9535	29.9217	0	0	5.84939	4.5207	0	0	17.116	9.88012	0	1	0.91362	0.919275	0	0	2.31744	2.30834	0	0	1.16306	1.56064	0	0	1.03913	1.10634	0	0
5/2/2016	1.44998	1.91884	0	0	8.82836	2.89273	1	1	5.36612	2.44768	1	0	17.6884	25.0689	0	0	5.69748	4.75294	0	0	10.4246	10.1567	0	0	0.913029	0.9295	0	0	2.73669	2.21219	0	1	1.08664	1.51258	0	0	1.09131	1.26665	0	0
6/2/2016	1.3436	1.68338	0	0	6.65639	2.92697	0	1	5.82953	1.96512	0	1	16.8057	23.2066	0	1	5.2467	5.3999	0	0	14.0152	6.91933	0	0	0.908117	0.923133	0	0	2.90142	2.20126	0	0	1.09378	1.484	0	0	1.085	1.18741	0	0
7/2/2016	2.47074	1.75108	0	0	6.5871	2.66291	0	1	5.91615	1.80135	0	0	16.1184	25.6391	1	1	5.85112	5.11541	0	0	17.7147	6.39732	0	0	0.921003	0.901393	0	0	2.84782	3.05771	0	0	1.12678	1.28337	0	0	1.07259	1.20431	0	0
8/2/2016	1.48485	1.58384	0	0	6.29533	3.3014	0	0	5.96901	1.67181	0	0	18.7697	22.6292	1	2	5.40275	5.11181	0	0	17.2022	6.99149	0	0	0.933674	0.900485	0	0	3.01379	2.49711	0	0	1.10248	1.22043	0	0	1.05983	0.961216	0	0
9/2/2016	4.43109	1.4825	1	0	6.80635	3.74123	0	0	4.96371	1.6753	0	0	19.1448	20.4237	1	2	5.34349	4.45346	0	0	19.1482	2.31237	0	1	0.924714	0.894669	0	0	3.11848	2.64676	0	0	1.13367	1.35054	0	0	1.0316	0.98633	0	0
10/2/2016	4.70173	1.55706	0	0	5.91331	5.87865	0	0	4.74713	1.55643	0	0	20.7592	19.7448	2	1	5.85831	4.79498	0	0	23.1479	2.43757	0	1	0.929801	0.89847	0	0	3.34183	2.65792	0	0	1.27002	1.32054	0	0	1.05677	1.00825	0	0
11/2/2016	4.48502	1.38994	0	0	8.11312	5.84313	0	0	4.44004	1.1865	0	1	20.768	19.989	1	2	5.24921	5.04184	0	0	18.8405	2.57723	0	1	0.927806	0.889034	0	0	2.6417	3.57511	0	0	1.4019	1.19152	0	0	1.07454	1.01103	0	0
12/2/2016	4.19041	2.79562	0	0	7.58348	6.26513	0	0	4.93899	1.00659	0	0	19.268	36.229	1	2	5.83375	4.99406	0	0	12.2583	9.86949	1	1	0.922466	0.882785	0	0	2.62034	3.88842	0	0	1.47224	1.12996	0	0	1.11151	0.991359	0	0
13/2/2016	4.20914	2.28108	1	0	9.35196	6.40652	0	0	5.00091	1.65161	0	0	20.7538	20.8369	1	1	5.67981	4.9573	0	0	11.3519	7.29568	0	0	0.922277	0.886473	0	0	2.71382	2.94047	0	0	1.3899	1.16557	0	0	1.27813	1.05856	0	0
14/2/2016	2.95482	2.03974	1	0	7.19807	5.77659	0	0	5.1703	1.46512	0	0	19.364	21.5356	3	1	5.89042	4.63973	0	0	19.1397	8.93664	0	0	0.922763	0.890889	0	0	2.68625	2.90131	0	0	1.45272	0.977991	0	0	1.24447	1.06575	0	0
15/2/2016	0.845904	1.80274	0	0	7.45263	5.50678	0	0	4.70594	1.65078	0	0	20.3996	21.7584	3	1	7.86222	4.53935	0	0	13.9106	5.36029	1	0	0.920749	0.896297	0	0	2.55043	2.81239	0	0	1.57764	0.982849	0	0	1.10018	1.10324	0	0
16/2/2016	1.34106	2.27291	0	0	6.5358	5.96805	0	0	3.93982	1.9178	0	0	17.7012	25.4375	2	0	5.47241	4.57702	0	0	13.5699	7.67607	0	0	0.924855	0.895003	0	0	2.42708	3.87858	0	0	1.39984	1.19867	0	0	1.19268	1.03768	0	0
17/2/2016	2.26886	2.29587	0	0	7.75323	5.42865	0	0	3.96119	1.88946	0	0	16.9085	23.2876	0	0	5.56189	4.90678	0	0	15.0999	9.23816	0	0	0.925575	0.883713	0	0	2.17564	3.66982	0	0	1.1035	1.14362	0	0	1.18184	1.04831	0	0
18/2/2016	1.37028	2.18281	0	0	7.99594	6.9348	0	0	4.17396	3.30897	0	0	20.1877	10.0156	0	2	5.80677	5.04054	0	0	13.3389	8.35364	0	0	0.932105	0.891232	0	0	2.16649	2.82805	0	0	1.04886	1.11449	0	0	1.15184	1.0986	0	0
19/2/2016	1.26574	2.33573	0	0	6.97123	5.57947	0	0	2.97116	4.18567	0	0	20.445	17.0674	1	1	5.71799	4.89152	0	0	12.5762	11.9792	0	0	0.944713	0.895241	0	0	1.66374	3.71203	0	0	1.06754	1.00016	0	0	1.20408	1.19128	0	0
20/2/2016	1.25912	2.01036	0	0	7.21418	6.50389	0	0	4.13715	4.07989	0	0	16.2917	16.5575	1	2	5.92681	4.48028	0	0	11.5672	13.5782	0	0	0.938908	0.892549	0	0	1.74906	3.51228	0	0	0.720425	1.47492	1	0	1.11841	1.17292	0	0
21/2/2016	1.26693	2.37631	0	0	8.85141	7.02678	0	0	2.82131	4.01572	0	0	14.6187	16.1868	1	2	6.02344	6.81338	0	0	11.908	6.62159	0	0	0.941928	0.906004	0	0	1.78463	3.29778	0	0	0.830736	1.65674	1	0	1.12346	1.09937	0	0
22/2/2016	1.44596	1.07851	0	0	7.64343	4.10242	0	0	2.65154	3.85913	0	0	19.3838	12.5374	1	2	6.1144	4.10184	0	0	10.8254	8.99774	0	0	0.932747	0.932818	0	0	1.83163	3.07193	0	0	0.916637	0.983886	0	0	1.12182	1.09326	0	0
23/2/2016	1.15307	1.0398	0	0	7.30991	3.92684	0	0	2.60252	3.84676	0	0	18.8977	13.0352	1	1	5.31069	4.16283	0	0	10.9677	9.02508	0	0	0.912392	0.936517	0	0	1.75091	2.86651	0	0	0.853521	1.04732	0	0	1.0803	1.19385	0	0
24/2/2016	1.1418	1.67354	0	0	13.8393	4.76863	0	0	3.45736	2.02114	0	0	12.6833	9.21354	2	2	5.01269	5.2642	0	0	12.2062	8.50448	0	0	0.907207	0.943548	0	0	1.4317	2.73729	1	0	0.729945	1.0243	0	0	1.06324	1.20203	0	0
25/2/2016	1.65705	2.21748	0	0	7.97106	5.37917	0	0	2.39945	2.06668	0	0	11.7619	25.2456	3	1	5.50584	5.94282	0	0	8.22954	7.47815	0	1	0.910242	0.943263	0	0	1.40652	2.69646	1	0	0.671023	0.948753	0	0	1.09828	1.105	0	0
26/2/2016	1.35765	1.85599	0	0	9.2263	7.25037	0	0	2.62397	2.00074	0	0	12.9202	13.1497	1	0	5.54739	4.29084	0	0	10.9435	5.53569	0	0	0.923205	0.948631	0	0	1.50695	1.86522	0	0	0.64743	1.02394	0	0	1.10388	1.11273	0	0
27/2/2016	1.47958	1.52092	0	0	3.02897	5.9476	0	0	2.66464	2.19504	0	0	12.4905	12.8917	1	0	6.04876	4.31746	0	0	7.90899	15.0219	0	0	0.924419	0.9277	0	0	1.47162	1.68328	0	0	0.83583	1.47632	0	0	1.12712	1.09112	0	0
28/2/2016	1.36942	1.34176	0	0	3.61905	5.65864	0	0	2.71152	2.0397	0	0	13.6844	17.3426	1	2	5.1532	4.70427	0	0	8.88652	17.5225	0	0	0.949951	0.910188	0	0	1.47647	1.60186	0	0	0.84908	0.981697	0	0	1.14088	1.09716	0	0
29/2/2016	1.39464	2.52021	0	0	3.35108	5.13842	0	1	3.92587	2.39314	0	0	13.4364	47.8246	0	0	5.83818	4.41579	0	0	9.28629	15.9763	0	0	0.973775	0.9091	0	0	1.48066	1.82686	0	0	0.745487	1.17865	0	0	1.10246	1.06045	0	0
1/3/2016	1.2718	1.28799	0	1	5.13885	6.50438	0	0	3.30548	2.99929	0	0	8.84222	20.6078	1	0	6.23264	4.93158	0	0	12.3044	14.6107	1	0	0.993171	0.893291	0	0	1.40896	1.83916	0	0	0.890636	0.907934	0	0	1.09717	1.11141	0	0
2/3/2016	1.33937	1.64792	0	0	7.97749	6.50439	0	0	2.95497	3.44773	0	0	9.05248	26.4679	2	0	6.28553	4.79716	0	0	5.62849	13.6939	0	0	0.997956	0.898906	0	0	1.97438	1.75812	0	0	0.867583	0.81475	0	0	1.08492	1.12898	0	0
3/3/2016	1.33598	1.12068	0	0	8.13457	6.50623	1	0	2.54406	3.45753	0	0	8.46614	26.0175	2	0	5.68008	4.54857	0	0	6.69942	13.1926	0	0	1.02053	0.900455	0	0	2.05913	2.02661	0	0	0.894762	0.876176	0	0	1.18395	1.14371	0	0
4/3/2016	1.30566	1.12332	0	0	5.28905	4.40397	0	0	2.9354	4.17255	0	0	9.56811	25.6669	0	0	5.27918	5.03566	0	0	6.23278	12.0395	0	0	1.01634	0.879838	0	0	2.30695	1.92563	0	0	1.0127	0.799439	0	0	1.21112	1.10898	0	0
5/3/2016	1.2319	1.06438	0	0	4.41899	3.39048	0	0	1.86812	3.19926	0	0	7.84324	20.9996	1	0	5.05515	4.37946	0	0	6.71339	10.3024	0	0	1.02363	0.878421	0	0	1.78391	1.98804	0	0	1.08544	0.79673	0	0	1.18016	1.12125	0	0
6/3/2016	1.30315	1.62677	0	0	3.42826	3.51333	0	0	2.2228	2.64321	0	0	7.91721	31.9254	0	0	4.72311	4.70988	0	0	6.33292	11.605	1	0	1.0215	0.882289	0	0	2.84281	2.40333	0	0	1.08903	0.787663	0	0	1.1666	1.08927	0	0
7/3/2016	1.49792	1.2133	0	0	4.86572	3.76454	0	0	2.00522	2.5347	0	0	4.63225	22.0266	1	0	4.7439	5.01427	0	0	6.26787	13.3584	2	0	1.00867	0.897282	0	0	1.58187	1.76507	0	0	1.13876	0.789023	0	0	1.18536	1.16139	0	0
8/3/2016	1.3027	1.04286	0	0	5.26116	3.74589	0	0	1.89043	2.41655	0	0	7.21231	21.1242	1	0	5.24532	4.96057	0	0	6.20276	14.6223	1	0	0.977891	0.906515	0	0	1.48372	1.71557	0	0	1.09653	0.949938	0	0	1.27793	1.09667	0	0
9/3/2016	1.1561	1.1249	0	0	4.72321	2.91063	1	0	1.84165	2.80836	0	0	5.64555	20.4213	1	0	4.32329	4.68571	0	0	3.74685	22.597	0	0	0.934769	0.916272	0	0	1.62871	1.64822	0	0	1.01508	0.824678	0	0	1.24088	1.14343	0	0
10/3/2016	1.68609	1.15429	0	0	4.75632	3.68185	0	0	1.81339	2.69111	0	0	4.96939	22.0689	2	0	4.31294	4.79808	0	0	3.59026	22.0115	0	0	0.930265	0.946484	0	0	1.6343	1.87354	0	0	0.989085	0.885195	0	0	1.2548	1.09062	0	0
11/3/2016	1.51073	0.813555	0	0	5.17883	3.97612	0	0	2.27729	2.51974	0	0	9.09833	22.0878	2	1	4.40685	4.93413	0	0	4.21618	21.8868	0	0	0.944838	0.958674	0	0	1.93539	1.83062	0	0	0.9706	0.782317	0	0	1.35178	1.18126	0	0
12/3/2016	1.97887	0.810606	0	0	5.24387	3.6437	2	0	2.46389	2.60273	0	0	7.26549	22.9422	2	1	4.63122	4.68659	0	0	3.18607	20.7027	0	0	0.936381	0.96618	0	0	2.68485	1.9883	0	0	1.0501	0.958516	0	0	1.36438	1.11094	0	0
13/3/2016	2.18521	0.980582	0	0	3.7987	3.49066	1	0	2.49043	2.54326	0	0	11.9369	20.3171	2	0	4.92456	4.58466	0	0	3.60645	17.7567	0	0	0.932653	0.985824	0	0	2.94225	2.40594	0	0	0.898381	1.31364	0	0	1.33197	1.11347	0	0
14/3/2016	1.87748	1.08799	0	0	3.42472	2.84679	1	0	2.19408	2.67493	0	0	5.45754	19.0397	2	0	4.9428	4.52731	0	0	8.47664	15.5667	0	1	0.924107	0.981362	0	0	3.0333	2.34619	0	0	0.954661	1.48198	0	0	1.30601	1.1441	0	0
15/3/2016	1.48218	1.12637	1	0	3.63505	4.1793	1	1	2.22098	3.26019	0	0	5.95987	19.222	1	1	4.98136	4.62987	0	0	7.78788	16.0611	0	1	0.950195	0.983694	0	0	2.01112	2.14231	0	0	0.840764	1.27611	0	0	1.07502	1.11202	0	0
16/3/2016	1.40767	1.87365	0	0	5.35235	4.32677	0	1	2.26568	3.25389	0	0	8.54535	20.6697	3	1	5.34227	6.00403	0	0	7.50816	15.903	0	1	0.960203	0.989023	0	0	1.7481	2.34744	0	0	0.829639	1.82208	0	0	0.896311	1.06527	0	0
17/3/2016	1.42816	1.40884	0	0	4.92345	4.99857	0	0	2.46304	3.20114	1	0	7.72737	21.7164	2	1	4.7159	6.04279	0	0	3.42266	16.0621	0	0	0.934621	0.97627	0	0	1.96292	2.80793	0	0	0.730595	1.58912	0	0	0.968906	1.09147	0	0
18/3/2016	1.49474	1.63557	0	0	5.12974	5.17786	0	0	3.04409	3.509	0	0	7.21108	20.5587	3	1	4.74995	5.86284	0	0	2.83407	15.2536	1	0	0.941436	0.984307	0	0	1.42964	2.9778	0	0	0.73898	1.41981	0	0	0.992652	1.04035	0	0
19/3/2016	1.45939	2.37771	0	0	5.49455	3.72944	0	0	2.8703	3.20344	0	0	8.70492	24.1251	2	0	4.49865	5.76918	0	0	2.60831	10.3527	1	0	0.944243	0.971556	0	0	1.83396	2.121	0	0	0.84377	1.28889	0	0	1.07036	1.13341	0	0
20/3/2016	1.44842	1.47128	0	0	5.92279	3.76846	1	0	2.84242	2.73491	0	0	7.35405	29.3922	4	0	4.54299	5.57932	0	0	2.9015	8.78434	0	0	0.947191	0.986563	0	0	1.76218	2.40684	0	0	0.955961	1.32652	0	0	1.12459	1.1347	0	0
21/3/2016	1.64434	1.52439	0	0	6.54656	3.59151	1	1	3.30522	2.76066	0	0	11.1954	23.8875	2	0	4.75903	5.51495	0	0	4.13121	8.23175	0	1	0.969238	1.00089	0	0	1.77914	1.46018	0	0	0.991905	1.12112	0	0	1.09613	1.1355	0	0
22/3/2016	1.93006	1.47789	0	0	6.61173	9.39595	0	0	2.55561	2.56557	0	0	16.2025	23.4115	1	0	4.73209	5.48603	0	1	4.14499	7.90802	0	0	0.953896	0.996779	0	0	2.03484	1.47398	0	0	1.08698	1.11695	0	0	0.9956	1.06463	0	0
23/3/2016	1.77416	1.3054	0	0	5.9994	10.2094	0	0	3.01352	2.71317	0	0	15.6843	24.6948	1	0	5.45544	5.03495	0	0	4.4104	7.86802	0	0	0.965331	0.980556	0	0	2.11832	1.43318	0	0	1.13686	0.863055	0	0	1.25119	1.04692	0	0
24/3/2016	1.4427	1.42788	0	0	5.60434	11.7926	0	0	2.7765	2.26626	0	0	12.9455	28.0559	1	0	5.34034	4.85842	0	0	5.35767	7.71373	0	0	0.988728	0.978352	0	0	2.18293	2.12499	0	0	0.93618	1.13713	0	0	1.20339	1.00059	0	0
25/3/2016	1.31151	1.57428	0	1	6.01234	10.7938	0	0	2.78503	2.55795	0	0	12.7044	25.5614	2	1	5.48819	5.80692	0	0	8.94144	9.25656	0	0	0.990904	0.914834	0	0	1.90363	1.90617	0	0	0.689337	1.07741	0	1	1.22103	0.980779	0	0
26/3/2016	2.21107	1.36192	1	0	6.47115	11.207	0	0	2.49017	2.25382	0	1	16.3482	27.9638	0	0	6.30964	5.4985	0	0	6.4408	12.2168	0	0	0.999892	0.913606	0	0	1.87278	1.62559	0	0	0.899981	0.853811	0	1	1.22587	0.970835	0	0
27/3/2016	1.79333	1.45948	1	0	5.61063	6.05026	0	0	2.63079	3.35564	0	0	15.4321	28.4305	1	0	7.37158	6.05803	0	0	6.16175	12.1666	0	0	0.992483	0.923094	0	0	1.71014	1.34824	0	0	0.934855	0.825943	0	0	1.09601	1.03198	0	0
28/3/2016	1.80637	1.48471	0	0	6.19139	5.45164	0	0	3.07772	4.48076	0	0	15.0506	29.5923	1	0	7.13749	5.59846	0	0	6.93998	10.741	0	0	0.99129	0.939185	0	0	1.83244	1.49274	0	0	0.959056	0.995179	0	0	1.06559	1.03611	0	0
29/3/2016	1.48892	1.47494	1	0	5.13153	5.55973	1	0	2.77752	4.37076	1	0	15.3864	20.4908	2	0	8.86841	5.12598	0	0	5.10243	10.7059	0	0	0.971066	0.941292	0	0	1.71346	1.62216	0	0	0.970449	0.898659	0	0	1.10285	1.02361	0	0
30/3/2016	1.75947	2.14335	0	0	5.82387	5.81109	0	0	2.93188	3.54247	0	1	19.692	24.6659	1	1	7.48664	4.95379	0	0	12.6165	8.86234	0	1	0.957304	0.871793	0	0	1.66336	1.60948	0	0	1.10203	0.794297	0	0	1.06233	1.0715	0	0
31/3/2016	1.77739	2.20053	0	0	7.1877	4.10171	0	0	2.75151	3.70788	1	0	19.2729	27.4236	0	0	5.20161	5.14541	0	0	11.377	8.77311	0	1	0.944933	0.929783	0	0	1.67545	1.75508	0	0	0.835525	1.04598	0	0	1.08754	0.963775	0	0
1/4/2016	2.23153	2.08498	0	0	7.1851	4.28083	0	0	3.36738	3.60921	0	0	17.5462	21.6236	1	0	4.76297	5.12797	0	0	3.45571	7.88151	0	0	0.9608	0.932601	0	0	1.48997	2.10405	0	0	0.944222	0.856414	0	0	1.17134	1.05086	0	0
2/4/2016	1.94907	1.61759	0	0	6.57462	4.31453	0	0	3.03764	3.05779	0	0	37.5165	24.6766	1	0	5.11442	5.55335	0	0	3.92571	9.58564	0	0	0.954983	0.847525	0	0	1.72029	1.48059	0	0	0.819313	0.832483	0	0	1.16658	1.07213	0	0
3/4/2016	1.38993	2.16703	0	1	6.20068	5.25067	0	0	2.55814	3.87506	0	0	19.1145	24.7536	1	0	5.02331	5.26263	0	0	7.00644	8.73331	0	0	0.95077	0.848604	0	0	1.82789	2.04821	0	0	0.862367	0.955161	0	0	1.23402	1.18654	0	0
4/4/2016	1.40538	2.34424	0	0	5.34752	5.00106	0	0	2.36098	3.42534	1	0	23.8061	29.2939	1	1	5.72178	5.22886	0	0	8.07172	8.29454	0	0	0.951889	0.844008	0	0	1.64705	2.19142	1	0	1.14694	1.19456	0	0	1.25267	1.34573	0	0
5/4/2016	1.77679	1.74341	0	0	7.91188	5.53287	0	1	2.26701	3.47962	0	0	27.3753	21.575	1	0	6.1865	7.16997	0	0	5.85434	7.39689	0	1	0.945668	0.830088	0	0	1.60826	2.12645	1	0	0.999376	0.888786	0	0	1.29136	1.20784	0	0
6/4/2016	1.57917	1.58947	0	0	8.67385	5.09749	0	1	2.34177	3.45939	0	0	22.9623	21.7396	2	0	5.67864	6.1142	0	0	6.74284	9.9926	0	0	0.967788	0.81457	0	0	1.51336	2.19002	1	0	1.11315	0.73346	0	0	1.24759	1.21871	0	0
7/4/2016	1.39814	2.53191	0	0	10.6497	5.1151	0	0	2.97998	3.6142	0	0	27.3471	38.557	1	1	5.92345	4.66698	0	0	8.52957	5.77324	0	0	0.95778	0.817874	0	0	1.99057	1.87789	0	0	1.32864	0.905628	0	1	1.37936	1.19365	0	0
8/4/2016	1.80502	1.47833	0	0	10.7979	4.87519	0	0	3.20149	2.83284	0	1	32.7867	21.4533	1	1	4.37702	5.9809	0	0	8.05295	5.61742	1	0	0.960325	0.810746	0	0	2.18539	1.96126	0	0	1.26687	1.03751	0	0	1.22275	1.093	0	0
9/4/2016	4.13531	1.55696	0	0	7.48803	5.1343	0	0	3.56975	2.88861	0	1	32.5145	17.5603	1	1	4.78362	5.26255	0	0	8.06763	5.99384	0	0	0.989204	0.751717	0	0	1.71698	2.58977	0	0	1.28734	0.951921	0	0	1.17142	1.08082	0	0
10/4/2016	1.8266	1.95523	0	0	8.59028	5.31555	0	0	5.34754	2.85701	0	1	18.2748	18.3322	1	0	4.84866	5.58319	0	0	13.8291	6.11944	0	0	0.975426	0.785585	0	0	2.70069	1.87812	0	0	1.21545	1.12302	0	0	1.22596	1.06592	0	0
11/4/2016	1.88601	1.64069	0	0	8.9405	5.46457	0	0	5.34837	2.82678	0	1	28.6364	20.2848	1	0	5.07914	5.37895	0	0	11.9736	4.19336	0	0	0.98089	0.737918	0	0	2.92776	2.7654	0	0	1.22348	1.26092	0	0	1.20954	1.04997	0	0
12/4/2016	1.93229	1.3893	0	0	7.95707	5.93463	0	1	5.49576	2.5834	0	1	26.778	23.6489	1	0	5.37511	5.45093	0	0	11.4753	4.88454	0	0	0.942472	0.881046	0	0	2.85913	2.51146	0	0	1.20603	1.21288	0	0	1.1692	1.02265	0	0
13/4/2016	1.95885	1.40696	0	0	8.86614	6.70053	0	1	5.17911	3.2334	0	0	30.9686	31.6122	1	0	4.453	5.46865	0	0	10.5216	6.8559	0	0	0.940168	0.88588	0	0	2.9497	3.33434	0	0	1.06983	1.17756	0	0	1.16894	1.18025	0	0
14/4/2016	2.35721	1.49392	0	0	6.23908	6.42563	0	1	5.19145	3.79803	0	0	36.0867	21.9874	1	0	4.79679	5.11103	0	0	10.4241	5.94222	0	0	0.942352	0.891725	0	0	2.94734	1.76348	0	0	1.14532	1.16634	0	0	1.08314	1.32104	0	0
15/4/2016	2.21972	1.70643	0	0	7.31302	5.92091	0	1	3.04161	3.34208	0	0	32.2057	25.1696	0	0	4.27928	4.90275	0	0	11.7001	7.67669	0	0	0.883678	0.883408	0	0	2.74738	1.71257	0	0	1.17991	1.06566	0	1	1.13582	1.31994	0	0
16/4/2016	2.16965	1.92233	0	0	7.73571	4.89667	0	1	2.81895	3.12541	0	0	29.926	26.8818	0	0	4.50243	5.10835	0	0	12.1221	5.8995	1	0	0.749216	0.88213	0	0	2.7672	2.64363	0	0	1.30668	1.10293	0	0	1.12767	1.54893	0	0
17/4/2016	1.82754	1.58455	0	0	6.25666	4.68168	0	1	1.56677	3.21424	1	0	24.6198	23.5998	0	1	5.26829	4.98698	0	0	11.771	5.99203	0	0	0.766578	0.893238	0	0	2.34607	2.3096	0	0	1.11663	1.15105	0	0	1.1683	1.59464	0	0
18/4/2016	1.90527	2.58026	0	0	5.86238	3.81262	0	1	1.58823	2.87556	1	0	26.7363	25.468	0	0	4.94432	4.83235	0	0	4.58322	5.92341	0	0	0.770841	0.799434	0	0	2.37813	2.62043	0	0	0.996841	1.23639	0	0	1.1082	1.09801	0	0
19/4/2016	1.53756	2.46034	0	0	5.40907	1.97779	0	1	1.49579	3.06598	2	0	21.0073	25.6601	0	0	4.54844	4.20383	0	0	10.9278	5.37917	0	0	0.778737	0.924704	0	0	2.44053	1.55351	0	0	0.80025	1.05396	0	0	1.0794	1.10724	0	0
20/4/2016	1.9208	2.52067	0	0	5.18366	1.77278	0	2	1.35877	2.41988	0	0	20.7203	25.2505	0	0	3.52094	4.03755	0	0	9.91531	5.82634	0	0	0.842268	0.934092	0	0	1.91808	1.97803	0	0	0.802257	1.07953	0	0	1.10795	1.09918	0	0
21/4/2016	1.79741	1.43926	0	0	4.35123	3.31442	0	1	1.17752	2.46197	1	0	23.3918	25.4883	0	0	3.93786	3.93464	0	0	9.58535	5.53574	0	0	0.829689	0.863907	0	0	1.68789	1.99231	0	0	1.02508	1.08793	0	0	1.08564	1.06861	0	0
22/4/2016	2.25365	1.42105	0	0	6.05712	3.26424	0	1	1.3322	2.95048	1	1	19.3748	25.3943	0	0	4.00669	4.43672	0	0	9.49738	6.8727	0	0	0.709413	0.870744	0	0	1.65182	2.09523	0	0	1.04794	0.943621	0	0	1.11665	1.07042	0	0
23/4/2016	2.69616	2.24197	0	0	6.47715	3.75294	0	0	1.20684	1.94539	1	0	17.2652	25.4276	0	0	4.48765	3.87493	0	0	9.69442	5.82368	0	0	0.697886	0.762538	0	0	1.75955	1.88811	0	0	0.988373	1.0284	1	0	1.12026	1.04288	0	0
24/4/2016	2.45831	2.35295	0	0	4.11783	3.54321	0	1	1.21222	1.27827	2	0	16.0059	24.1704	0	0	4.5163	3.89293	0	0	10.1665	6.25448	0	0	0.687787	0.831836	0	0	1.8818	1.67746	0	0	1.0757	1.08038	1	0	1.36031	1.12111	0	0
25/4/2016	3.13925	2.89282	0	0	3.63106	3.57937	0	0	1.48179	3.5817	0	0	16.4362	26.7385	0	0	5.30861	4.14084	0	0	5.46702	7.02055	0	0	0.739096	0.771403	0	0	1.95274	1.64492	0	0	0.991012	1.01241	1	0	0.961439	1.18166	0	0
26/4/2016	3.16321	2.51318	0	0	6.28912	4.25059	0	0	1.72746	3.42541	0	0	15.3351	25.2354	1	0	4.82789	4.39263	1	0	6.07159	8.03775	0	0	0.75026	0.830927	0	0	2.56531	1.83305	0	0	0.893277	1.0926	1	0	0.973461	1.1814	0	0
27/4/2016	3.23103	2.29729	0	0	5.31098	3.05199	0	0	1.80884	3.29326	1	0	13.3865	23.8964	0	0	4.5817	3.89179	0	0	5.19	5.51657	0	0	0.705518	0.825309	0	0	2.49369	1.63897	0	0	0.894276	0.990113	1	0	1.05169	1.17814	0	0
28/4/2016	2.34877	2.34799	0	0	4.9535	4.60208	0	0	1.77985	3.37862	1	0	19.9346	22.4689	0	0	4.38407	4.03044	0	0	4.44994	4.87079	0	0	0.746288	0.843215	0	0	2.63308	1.42721	0	0	0.95466	0.902784	1	0	1.04	1.01646	0	0
29/4/2016	2.44289	2.49653	0	0	5.43756	4.50257	0	0	1.32449	3.42282	1	0	19.7655	23.1631	0	0	4.61239	4.45762	0	0	4.46128	4.57664	0	0	0.744983	0.801822	0	0	2.05549	1.79856	0	0	1.36575	0.850567	1	0	1.13319	1.04086	0	0
30/4/2016	2.42418	2.33518	0	0	5.97806	4.55325	0	1	1.11345	1.72554	0	0	18.0432	21.1959	1	0	4.57688	4.3449	0	0	4.76668	3.78244	0	0	0.700718	0.815674	0	0	1.87016	1.87669	0	0	1.49455	0.856925	0	0	1.15965	0.889694	0	0
1/5/2016	2.28894	2.58733	0	0	6.33533	4.72966	0	0	1.5143	1.57039	1	0	23.9169	19.8227	0	0	4.06111	4.15091	0	0	5.36204	4.21826	1	0	0.642862	0.860133	0	0	1.69497	1.94956	0	0	1.47786	0.76298	0	0	1.17271	1.00813	0	0
2/5/2016	1.83056	1.96383	0	0	5.38989	7.25437	0	0	1.80484	2.99191	0	1	23.3046	24.4499	0	0	4.15016	4.48497	0	0	5.80437	3.6709	0	0	0.611878	0.849376	0	0	1.71458	1.82653	0	0	1.46136	0.636053	0	0	1.18887	1.00173	0	0
3/5/2016	1.69597	1.65873	0	0	5.48674	5.07808	0	0	2.09477	0.803443	0	0	23.7509	21.9373	0	0	3.49474	4.80704	0	0	7.0953	4.84858	0	0	0.602746	0.755266	0	0	1.56939	1.80411	0	0	1.51425	0.561813	0	0	1.28887	0.957388	0	0
4/5/2016	1.45788	1.18698	0	0	5.04556	4.81362	0	0	2.01887	0.941676	0	0	20.0705	24.5248	0	0	3.92735	4.71748	0	0	6.90191	4.14896	0	0	0.801231	0.685988	0	0	1.4746	1.93737	0	0	1.69424	0.645466	0	0	1.22039	0.884901	0	0
5/5/2016	1.84447	1.15527	0	0	4.23817	4.57036	0	0	1.55131	2.71219	0	1	22.3487	22.8659	0	0	4.18353	5.16097	0	0	5.92038	4.95805	0	0	0.825819	0.695667	0	0	1.43851	1.90361	0	0	0.985387	0.72893	0	1	1.15089	0.961665	0	0
6/5/2016	1.45215	1.47491	0	0	5.23092	4.76056	0	0	1.78937	0.683443	1	1	24.62	17.3235	0	0	4.32057	5.02382	0	0	5.71419	4.24923	0	0	0.777692	0.69693	0	0	1.61169	1.61408	0	0	1.16205	0.722791	0	0	1.13656	1.1042	0	0
7/5/2016	1.72335	1.13579	0	1	4.06973	6.85329	1	0	1.98854	3.01206	1	0	25.494	15.495	0	1	4.14637	3.4037	0	0	6.91165	3.88493	0	0	0.776856	0.708424	0	0	1.61497	1.51891	0	0	0.830958	0.979942	0	0	1.26004	1.01034	0	0
8/5/2016	1.87656	1.06282	0	1	3.85884	6.3387	1	0	2.02959	3.04841	1	2	27.0521	16.8092	0	1	3.91168	3.48805	0	0	6.0997	3.85752	0	0	0.944558	1.11999	0	0	1.623	1.45782	0	0	0.845627	1.07903	0	1	1.22269	1.05437	0	0
9/5/2016	1.44479	1.6043	1	0	3.62234	6.59174	0	0	1.77928	3.95809	0	2	31.6018	21.1294	0	1	3.83239	3.57166	0	0	6.46207	2.87663	0	0	0.943301	1.01249	0	0	1.54467	1.48126	0	0	1.22963	1.02324	0	1	1.26425	1.03578	0	0
10/5/2016	1.45576	1.28658	0	0	3.73607	6.56772	1	1	1.34398	4.26081	1	3	31.4998	16.5321	0	0	3.46905	4.02576	0	0	5.57222	3.64574	0	0	1.03001	1.10417	0	0	1.55178	1.54329	0	0	1.07043	0.984518	1	0	1.4852	1.03994	0	0
11/5/2016	1.25733	1.25291	0	0	4.18878	6.05514	0	1	1.27754	2.56134	0	2	29.8963	19.8691	0	0	3.147	5.13381	0	0	5.21175	3.83756	0	0	0.939758	1.10068	0	0	1.5557	1.83231	0	0	0.699372	1.07165	1	0	1.53996	1.01531	0	0
12/5/2016	1.1238	1.16054	0	0	4.76902	6.66344	0	1	1.40192	2.74156	0	1	30.5688	24.5972	0	0	3.10196	5.33414	0	0	6.49814	3.72256	0	0	0.712918	1.09559	0	0	1.57701	1.88455	0	0	0.732977	1.30722	0	1	1.52801	1.02876	0	0
13/5/2016	1.03836	1.1285	0	0	4.58445	6.89925	1	1	0.87644	2.63782	0	1	25.5706	22.8084	0	0	3.43443	4.56182	0	0	6.19005	3.08503	0	0	0.673212	1.06919	0	0	1.51897	2.00078	0	0	1.10084	1.25096	1	0	1.50522	1.0796	0	0
14/5/2016	0.982216	1.31475	1	0	4.54926	7.28518	0	1	0.951275	2.6428	1	0	24.7019	24.0012	0	0	3.74487	4.41557	0	0	5.50319	3.77308	0	0	0.722279	1.13277	0	0	1.5899	2.02419	0	0	0.883438	1.18692	1	0	1.3142	1.13191	0	0
15/5/2016	1.17715	1.01514	0	0	5.34438	5.49469	0	0	1.0642	3.75714	0	0	31.584	23.6498	0	0	3.71191	4.70422	0	0	4.42539	2.84277	0	0	0.726867	1.12551	0	0	1.73762	1.94258	0	0	1.28473	1.24956	1	0	1.24218	1.128	0	0
16/5/2016	1.03612	1.01228	0	1	6.1872	4.68538	0	0	1.25348	3.73676	1	0	36.5015	29.8324	0	0	4.19055	3.9679	0	0	4.69493	2.75863	0	0	0.729194	0.872434	0	0	1.70915	2.15429	0	0	0.861712	1.30261	1	0	1.21981	1.14509	0	0
17/5/2016	0.948267	1.1043	1	0	4.54906	2.83645	0	1	1.25059	3.04002	0	0	35.5874	27.1108	0	0	4.18566	3.59535	0	0	4.47553	2.90196	0	1	0.722458	0.848374	0	0	1.69109	2.15167	0	0	0.983758	1.08216	0	0	1.10902	1.01023	0	0
18/5/2016	0.996385	1.12793	1	0	4.60128	5.98492	0	1	1.06567	3.93246	1	0	31.176	24.6162	0	0	4.37416	3.4735	0	0	3.93834	3.57761	0	0	0.728166	0.853983	0	0	1.64628	2.40172	0	0	0.869153	1.0432	0	0	1.34473	1.08787	0	0
19/5/2016	0.987634	1.74819	1	0	4.22407	6.07821	0	0	1.0265	3.06165	1	0	26.1505	39.0692	0	0	3.8672	3.3434	0	0	4.70207	4.7522	0	0	0.729697	0.853432	0	0	1.79208	2.16579	0	0	0.937604	1.02408	0	0	1.27458	1.11286	0	0
20/5/2016	1.07298	1.35502	0	0	4.26875	6.02675	0	0	0.862461	2.79945	0	0	29.0761	38.1877	0	0	3.93028	3.21043	0	0	5.39829	3.93106	0	0	0.66041	0.87109	0	0	1.82193	2.29961	0	0	1.14233	1.0639	0	1	1.27291	1.02377	0	0
21/5/2016	1.08204	1.3842	0	0	4.75121	3.37849	0	0	0.90158	2.08313	1	0	30.8908	38.3921	0	0	3.78623	3.73125	0	0	5.20129	3.6186	0	0	0.567649	0.758782	0	0	1.70161	2.40856	0	0	1.12383	1.04298	0	0	0.956856	0.898898	0	0
22/5/2016	1.08445	1.52236	0	0	4.69204	3.60106	0	0	1.21447	2.32124	0	0	28.3344	35.2944	0	0	3.49743	3.8554	0	0	7.95875	3.39163	0	0	0.558969	0.758448	0	0	1.74953	2.59605	0	0	0.993897	1.2003	0	0	0.977495	0.91786	0	0
23/5/2016	0.999118	1.37697	0	0	4.54296	4.83955	0	0	1.51605	2.46686	0	0	28.3998	35.258	0	0	3.37195	3.36434	0	0	6.27688	2.58021	1	0	0.57614	0.764046	0	0	2.01952	1.84588	0	0	0.885769	1.23288	1	0	1.14802	0.952801	0	0
24/5/2016	1.26403	1.44836	0	0	5.12876	5.31248	0	0	1.50762	4.35418	0	0	25.8168	36.5632	0	1	3.64066	3.00606	0	0	6.31918	10.4937	0	0	0.600496	0.773682	0	0	1.94911	1.6516	0	0	0.921268	1.25837	1	0	0.921304	1.02171	0	0
25/5/2016	1.07836	1.28226	0	0	5.70918	5.59801	0	0	1.44669	4.11263	0	0	27.352	30.005	0	1	3.29579	3.26194	0	0	8.36856	9.95478	0	0	0.592982	0.772255	0	0	1.75077	1.4497	0	0	0.950361	1.45735	1	0	0.990793	0.988111	0	0
26/5/2016	1.36347	1.41579	0	0	5.14641	5.91494	0	0	1.69702	0.932174	0	1	27.3712	15.9549	0	1	3.2455	2.99923	0	0	4.11748	6.49302	0	0	0.521064	0.781696	0	0	1.7981	1.47738	0	0	0.936969	1.3904	1	0	0.966026	1.11665	0	0
27/5/2016	1.7365	1.46428	0	0	3.36039	5.80877	0	0	1.61611	0.935183	0	1	26.176	34.9538	0	1	3.54127	3.00489	0	0	7.48253	6.48538	0	1	0.533942	0.766895	0	0	1.85605	1.49642	0	0	0.944137	0.982687	1	0	0.94768	1.05854	0	0
28/5/2016	1.54534	1.00728	0	0	4.23822	5.32343	0	0	1.65733	0.862461	0	2	25.2881	33	0	1	3.54952	2.84081	0	0	5.6556	5.1908	0	0	0.492485	0.849073	0	0	1.884	1.5396	0	0	0.906914	1.05188	0	0	0.943383	0.962048	0	0
29/5/2016	1.86207	0.903873	0	0	4.88796	5.31429	0	0	1.30553	1.23352	0	0	23.5821	17.4173	0	1	3.26174	2.92998	0	0	7.00829	5.6832	0	0	0.493437	0.624634	0	0	1.84609	1.40028	0	0	0.889453	1.03845	1	0	1.00284	1.05682	0	0
30/5/2016	1.43003	0.8897	0	0	4.92926	5.41956	0	0	1.27096	1.13982	0	0	22.6434	17.912	0	0	3.29499	2.97925	0	0	3.90902	5.55578	0	0	0.424316	0.608822	0	0	1.73314	1.4411	0	0	0.868646	0.994558	1	0	1.0456	1.02255	0	0
31/5/2016	1.496	0.980485	0	0	5.22503	4.8866	0	0	4.34182	1.27565	0	0	22.6927	34.9644	0	0	3.02459	3.11629	0	0	4.42042	5.04179	0	0	0.360135	0.591044	0	0	1.69509	1.25858	0	0	0.832314	0.956245	1	0	1.04811	1.1131	0	0
1/6/2016	1.44727	0.840261	0	0	4.27255	6.5271	0	0	4.58358	1.29619	0	0	37.7479	16.306	0	0	3.13728	3.07305	0	0	5.18144	4.42559	0	0	0.364648	0.606726	0	0	1.59781	1.12119	0	0	0.865754	1.06863	0	0	0.969006	1.15447	0	0
2/6/2016	1.63002	0.950566	0	0	4.01666	6.01595	0	0	3.17471	1.20184	0	0	28.6674	14.9923	1	0	2.99489	2.69816	0	0	4.43129	8.64931	0	0	0.532441	0.584953	0	0	1.55862	1.38255	0	0	0.802028	0.962927	0	0	1.02101	0.97099	0	0
3/6/2016	1.62324	0.92001	0	0	3.66178	5.88829	0	0	3.19757	1.30959	0	0	27.4987	14.0068	1	1	3.01956	2.94296	0	0	5.02482	8.15687	0	0	0.530445	0.516354	0	0	1.6018	1.36898	0	0	0.767983	0.927167	0	0	1.00457	0.97663	0	0
4/6/2016	1.70938	0.757517	0	0	3.41113	5.36647	1	0	4.83721	1.13209	0	0	25.4382	16.1668	1	0	3.2448	2.8647	0	0	4.85951	7.40058	0	0	0.483299	0.410271	0	0	1.72564	1.25861	0	0	0.913826	1.25968	0	0	1.04174	0.951081	0	0
5/6/2016	1.47174	0.740342	0	0	5.11648	3.55851	0	1	4.50837	1.15544	0	0	26.7339	16.2855	0	0	3.38202	3.24476	0	0	5.50955	4.35884	0	0	0.65899	0.417825	0	0	1.8673	0.951206	0	0	0.740549	1.1939	0	0	1.046	0.926563	0	0
6/6/2016	1.25164	0.645137	0	0	6.11649	5.13693	0	0	4.05958	1.01738	1	0	29.0515	15.9875	1	0	3.2058	3.4326	0	0	6.56991	4.4791	0	0	0.663305	0.402938	0	0	1.55597	1.14746	0	0	0.739366	1.09119	0	0	0.97158	0.820867	0	0
7/6/2016	1.86786	0.94062	0	0	5.10166	5.40065	0	1	4.06006	1.24762	0	0	34.1459	19.2284	1	0	3.4278	3.03824	0	0	4.68173	3.4163	0	0	0.41139	0.397545	0	0	1.67214	1.44779	0	0	0.713498	0.731108	0	0	0.994077	0.866102	0	0
8/6/2016	0.998942	0.674981	0	0	4.47882	5.8488	0	0	3.67928	1.2297	1	0	38.9537	13.0921	1	0	2.89684	3.47477	0	0	5.24849	3.35197	0	0	0.371668	0.412049	0	0	1.93254	1.49878	0	0	0.782574	0.953241	0	0	0.986962	0.874183	0	0
9/6/2016	1.43517	0.856146	0	0	3.49721	5.8081	0	0	3.47367	1.41892	1	0	37.1498	13.2137	1	0	2.58351	3.51585	0	0	4.76784	3.34651	1	0	0.359647	0.418885	0	0	1.89024	1.24677	0	0	1.00438	0.811705	0	0	1.00321	1.01897	0	0
10/6/2016	1.60005	0.808384	0	1	2.79933	3.94623	0	0	1.36385	1.21886	1	0	35.1316	12.1218	0	0	3.19467	3.40469	0	0	4.93134	3.28928	0	0	0.356528	0.429552	0	0	1.90083	2.0867	0	0	1.17662	0.617619	0	0	0.858071	0.965199	0	0
11/6/2016	1.54082	0.78309	0	0	2.41412	3.46472	1	0	1.41497	1.31136	1	0	35.6423	17.4477	1	0	3.14571	2.36058	0	1	5.30244	2.95214	0	0	0.353192	0.434935	0	0	1.97244	2.21621	0	0	0.868516	0.800291	0	0	0.862196	0.945408	0	0
12/6/2016	0.87794	0.840859	1	0	2.92522	4.04646	1	0	0.581125	1.06	2	0	31.0993	15.7762	2	0	2.58937	2.05008	0	0	6.6781	2.59439	0	0	0.365343	0.518754	0	0	1.86845	1.98697	0	0	0.781807	0.778273	0	0	0.846516	0.971692	0	0
13/6/2016	1.01625	0.740525	0	0	2.77885	3.60174	1	0	0.549199	0.979431	3	0	30.4061	22.611	0	0	1.86363	2.40938	1	1	8.78495	3.01261	0	0	0.365122	0.553066	0	0	1.73318	1.56246	0	0	0.794729	0.649277	0	0	0.885776	0.919496	0	0
14/6/2016	0.813719	0.697358	0	0	3.16595	4.94389	0	0	0.520402	0.926577	2	1	21.9198	22.7073	0	0	1.84106	2.43753	0	1	7.41534	3.18954	0	0	0.400319	0.548675	0	0	1.61458	2.14739	0	0	0.900077	0.578709	0	0	0.90785	0.890302	0	0
15/6/2016	0.950097	0.777673	1	0	3.6537	4.96724	0	0	0.480665	0.929231	2	0	20.4711	15.0818	0	0	2.74106	2.42911	0	0	3.98669	3.28151	0	0	0.39803	0.473279	0	0	1.48817	2.11305	0	0	1.03625	0.598383	0	0	0.864421	0.897561	0	0
16/6/2016	0.74096	0.889177	0	0	3.82388	5.27448	0	0	0.592978	1.09214	1	0	20.3252	13.8604	0	1	2.73471	2.36568	0	0	4.0593	3.41314	0	0	0.394769	0.401139	0	0	1.71064	2.00367	0	0	1.03107	0.709924	0	0	0.881558	0.855817	0	0
17/6/2016	0.777641	0.931821	0	0	3.09256	4.72768	0	0	0.613701	1.15519	0	0	16.8741	25.8447	0	0	2.18586	2.53722	0	0	3.80157	3.32683	0	0	0.465717	0.364341	0	0	1.6979	1.71012	0	0	1.24384	0.585313	1	0	0.900954	0.876815	0	0
18/6/2016	0.687799	0.822496	0	0	3.16475	7.43063	0	0	1.15645	1.09082	0	0	20.7666	25.4662	0	0	2.02683	2.41491	0	0	3.24334	3.27221	0	0	0.32492	0.361327	0	0	1.82746	1.66661	0	0	0.960406	0.728762	0	0	0.8403	0.924634	0	0
19/6/2016	0.662123	0.71769	0	0	3.19091	8.44581	0	0	0.983083	1.06128	1	0	21.2733	36.4509	0	0	3.23864	2.42548	0	0	3.99303	3.02181	0	0	0.324728	0.391349	0	0	1.83268	1.7092	0	0	1.08465	0.654989	0	0	0.831825	0.857257	0	0
20/6/2016	0.803949	0.700937	0	0	2.84881	7.2085	0	0	1.20418	0.987326	0	0	19.7815	30.5526	0	0	2.3549	2.23757	1	0	3.2654	3.54425	1	0	0.322748	0.420701	0	0	1.77046	1.63775	0	0	1.15438	0.566529	0	0	0.827266	0.84677	0	0
21/6/2016	0.771635	0.888189	1	0	4.2776	4.73889	0	1	1.23545	0.830073	0	0	16.8205	26.3458	0	1	2.48857	2.13909	0	0	2.76812	3.18941	1	0	0.360792	0.409552	0	0	1.64723	1.63148	0	0	1.08931	0.544262	0	0	0.817344	0.828604	0	0
22/6/2016	0.794413	0.806641	1	0	3.83245	3.96904	0	1	1.09884	0.821622	0	1	18.9498	26.555	0	0	2.13422	1.88836	0	0	3.4803	3.34562	1	0	0.357317	0.404329	0	0	1.75692	1.84445	0	0	1.07784	0.702603	0	0	0.878753	0.84472	0	0
23/6/2016	0.844026	0.789282	0	0	3.51669	2.65796	0	0	1.17036	0.620617	0	1	15.9961	29.2479	1	0	2.20323	1.78711	0	0	3.60671	3.33042	0	0	0.355958	0.32148	0	0	1.60359	1.84185	0	0	0.936856	0.704232	0	0	0.855132	0.807039	0	0
24/6/2016	1.0466	0.681079	0	0	4.52423	3.43516	1	0	0.92354	0.639089	0	1	26.5995	22.5713	0	0	1.82557	1.78948	0	0	3.49103	2.80851	0	0	0.34707	0.248765	0	0	1.66211	2.02514	0	0	0.575798	0.708574	0	0	0.832242	0.83012	0	0
25/6/2016	0.966119	0.79315	0	0	4.01244	2.60906	0	0	0.964962	0.606655	0	1	17.1342	24.6255	0	0	1.15391	1.63796	0	0	3.14596	2.67803	0	0	0.305073	0.280525	0	0	1.39844	1.11167	1	1	0.685375	0.645474	0	0	0.7694	0.887918	0	0
26/6/2016	1.2809	0.546514	0	0	4.55193	3.83358	1	0	0.965627	0.681835	0	0	28.0911	28.866	1	0	1.09603	1.97922	1	0	3.59494	2.55775	0	0	0.300811	0.272227	0	0	1.35394	1.08401	0	1	0.733059	0.707559	0	0	0.788263	0.881876	0	0
27/6/2016	0.915486	0.597517	0	0	3.87967	3.81841	1	0	1.18153	0.71561	0	1	17.1011	27.3438	2	0	0.953121	1.69885	1	0	3.75799	2.43191	0	0	0.288037	0.252847	0	0	1.35893	1.34757	0	1	0.648822	0.727352	0	0	0.758108	0.791389	0	0
28/6/2016	0.950623	0.652753	0	0	3.72365	4.34622	0	0	1.31788	0.688917	0	0	28.0274	26.8487	1	0	0.866696	1.60574	1	0	3.52906	3.3509	0	0	0.311872	0.275833	0	0	1.17875	1.52	0	0	0.694299	0.731995	0	0	0.752772	0.841299	0	0
29/6/2016	1.01859	0.698785	0	0	3.81837	4.35961	0	0	1.23305	0.541692	0	0	17.2713	26.3551	0	0	1.06652	1.50429	4	0	4.16057	3.73578	0	0	0.293677	0.262736	0	0	1.48651	1.34834	1	0	0.672103	0.729609	0	0	0.727354	0.826131	0	0
30/6/2016	0.838484	0.790765	0	0	4.26391	3.70152	0	1	1.21513	0.47489	0	0	20.2049	9.82867	0	0	0.77904	1.46289	3	0	4.10753	3.60983	0	0	0.28005	0.25291	0	0	1.33663	1.2596	0	0	0.675297	0.81782	0	0	0.721721	0.80824	0	0
1/7/2016	0.801452	0.607977	0	0	4.07163	5.11331	0	0	0.90947	0.683952	0	0	18.7581	10.4304	0	0	1.05897	1.39648	1	0	3.94937	3.96735	1	0	0.274809	0.248567	0	0	1.41561	1.03069	1	0	0.63692	0.852628	0	0	0.759926	0.813534	0	0
2/7/2016	0.82752	0.633996	0	0	4.17533	4.68881	0	0	0.85831	0.68396	0	0	23.8555	10.8151	0	0	0.478745	1.36735	3	0	3.49072	3.47238	1	0	0.268753	0.164857	0	0	1.37959	0.91881	0	0	0.603881	0.783028	0	0	0.838464	0.811698	0	0
3/7/2016	0.722398	0.557467	0	0	3.57278	2.52847	0	0	1.03572	0.662264	0	0	21.1781	9.17162	0	0	0.497357	0.928891	2	0	3.03166	3.09134	0	0	0.194672	0.142164	0	0	1.39165	1.00524	0	0	0.59039	0.725575	0	0	0.79752	0.797445	0	0
4/7/2016	0.715621	0.658209	0	0	3.57455	3.58929	1	0	0.901061	0.6361	1	0	13.3278	13.0006	0	0	0.457442	0.855009	2	0	2.60854	2.87064	0	0	0.122784	0.125335	0	0	1.68785	1.01777	0	0	0.664779	0.702533	0	0	0.805285	0.805839	0	0
5/7/2016	0.509352	0.598317	0	1	2.06486	2.28057	2	0	0.776911	0.635993	1	0	10.1896	11.1663	0	0	0.434451	0.819723	5	0	1.92247	2.62848	0	0	0.116746	0.108774	0	0	1.58504	1.16578	0	0	0.716403	0.773489	0	0	0.869564	0.792904	0	0
6/7/2016	0.436932	0.533154	0	0	1.37511	2.95683	3	1	0.676101	0.710723	0	0	10.6832	13.4404	0	0	0.398553	0.704814	4	0	2.48212	2.4549	0	0	0.112252	0.133068	0	0	1.46184	1.14376	0	0	0.683852	0.744726	0	0	0.945404	0.702842	0	0
7/7/2016	1.40543	0.687962	0	0	1.46787	1.96709	2	0	0.975994	0.739091	0	1	10.8396	11.3625	0	0	0.383729	0.908196	2	0	2.73023	2.53098	0	0	0.102333	0.107591	0	0	2.06472	1.05057	0	0	0.64532	0.734338	0	0	0.973022	0.74036	0	0
8/7/2016	1.40773	0.568058	0	0	1.59755	1.86275	1	0	0.877338	0.707008	0	0	10.2232	10.6288	0	0	0.510084	0.835749	2	0	2.11376	2.08698	0	1	0.100783	0.0983329	0	0	2.03703	1.15099	0	0	0.627701	0.755716	0	0	0.975055	0.774416	0	0
9/7/2016	1.34558	0.77511	0	1	1.60026	2.98005	2	1	0.944054	0.534883	0	0	10.771	11.0626	0	1	0.561553	0.735418	2	0	2.08729	2.24605	0	0	0.105879	0.0944082	0	0	1.66714	1.14263	0	0	0.694745	0.660494	0	0	1.02828	0.777886	0	0
10/7/2016	1.33932	0.681562	0	1	1.14406	3.35879	1	0	0.748532	0.542858	0	1	12.0671	11.5976	0	0	0.697566	0.58798	2	1	2.2713	2.33913	0	0	0.135168	0.084394	0	0	1.87534	1.07441	0	0	0.751503	0.612117	0	0	0.900388	0.785496	0	0
11/7/2016	1.31632	0.713702	0	2	1.69962	3.48643	1	0	0.714536	0.621552	0	0	11.9408	11.756	0	1	0.56266	0.522968	0	0	2.29893	2.58003	0	0	0.125639	0.0733322	0	0	1.97122	0.989564	0	0	0.799123	0.620285	0	0	0.819222	0.750481	0	0
12/7/2016	0.463402	0.683395	1	0	1.60376	2.45686	1	0	0.890085	0.587061	0	0	12.5296	23.243	0	0	0.417068	0.554961	1	0	2.33153	2.74264	0	0	0.101893	0.0716887	0	0	1.35345	1.04496	0	0	0.749273	0.617657	0	0	0.947486	0.737367	0	0
13/7/2016	0.468759	0.656444	0	1	2.20098	2.23382	1	0	0.850829	0.556514	0	0	18.8862	8.55938	0	0	0.443142	0.447303	2	0	2.52552	2.49674	0	0	0.0946437	0.0561733	0	0	1.37363	1.0754	0	0	0.708533	0.661989	0	0	0.859201	0.758478	0	0
14/7/2016	0.527046	0.633097	1	1	2.23885	2.23945	0	0	0.298583	0.516235	1	1	16.3249	10.0406	0	0	0.481175	0.44899	1	0	2.47178	2.43667	0	0	0.084429	0.0530543	0	0	1.47506	1.30269	0	0	0.693181	0.70611	0	0	0.885403	0.747729	0	0
15/7/2016	0.470793	0.661882	1	1	2.76092	1.91583	0	0	0.339795	0.458126	0	0	16.3527	10.6665	0	0	0.510877	0.455314	1	0	2.5121	2.17302	0	0	0.0771013	0.0483668	0	0	1.5226	1.3977	0	0	0.77455	0.68082	0	0	0.838708	0.655513	0	0
16/7/2016	0.48342	0.673046	0	1	2.71704	1.82994	0	0	0.29536	0.419435	0	1	21.3511	10.0946	0	1	0.459936	0.447781	3	1	2.34156	2.25301	0	0	0.0711607	0.0406079	0	0	1.4188	1.46147	0	0	0.645044	0.617069	0	0	0.873058	0.652401	0	1
17/7/2016	0.45556	0.65679	0	1	2.34875	1.84118	0	0	0.288338	0.361996	1	1	25.4052	8.91086	0	2	0.578279	0.466058	1	0	2.08875	2.1309	0	0	0.0750181	0.0363365	0	0	1.49394	1.42363	0	0	0.671862	0.615641	0	0	0.99357	0.642899	0	0
18/7/2016	0.752002	0.560702	0	2	2.53275	1.99968	0	0	0.298076	0.316624	0	1	29.8857	8.19992	0	1	0.403633	0.434785	1	0	2.04754	2.22398	0	0	0.073993	0.0225252	0	0	1.71204	1.46952	0	0	0.617497	0.654295	1	0	0.984208	0.731859	0	0
19/7/2016	0.512629	0.440325	0	0	2.12361	2.38451	1	0	0.259971	0.279941	0	2	26.4092	6.48303	0	2	0.381064	0.416368	2	2	1.77879	2.22764	0	0	0.0721435	0.0215158	0	0	1.42697	1.5721	0	0	0.57592	0.625413	1	0	0.967103	0.661178	0	0
20/7/2016	0.540509	0.460167	1	1	2.34703	2.32991	0	0	0.246592	0.334842	0	0	22.6729	7.32605	0	3	0.312533	0.428621	3	1	1.89002	2.23999	0	0	0.0633004	0.0138118	0	0	1.19225	1.4438	0	0	0.542374	0.589868	0	0	0.980449	0.655824	0	0
21/7/2016	0.509502	0.407494	0	1	2.3291	2.27009	0	0	0.192194	0.281993	2	0	23.0659	7.72604	0	2	0.244784	0.408757	4	1	1.91332	2.2473	0	0	0.102509	0.0142599	0	0	1.15222	1.29356	0	0	0.580404	0.563356	0	0	0.947751	0.649306	0	0
22/7/2016	0.542782	0.414909	0	1	2.40298	1.69464	0	1	1.59782	0.225129	0	0	23.1549	7.10407	0	2	0.717587	0.30333	2	1	2.37647	2.47285	0	0	0.098039	0.011566	0	0	1.57117	1.24891	0	0	0.58077	0.542326	0	0	0.877186	0.636684	0	0
23/7/2016	0.541844	0.391188	1	0	2.53811	1.0589	0	0	1.34847	0.227613	0	0	22.3266	12.2736	0	2	0.824917	0.32005	0	1	2.11635	2.35273	0	0	0.0921473	0.00812936	0	0	1.58905	1.0637	0	0	0.608909	0.516508	0	0	0.801354	0.739001	0	0
24/7/2016	0.697106	0.799275	0	0	2.22419	1.09681	0	0	0.244965	0.308041	1	0	20.6756	7.12335	0	2	0.449125	0.37046	1	0	2.22082	2.39344	0	0	0.0901818	0.0107078	0	0	1.44549	1.17571	0	0	0.673409	0.588811	0	0	0.919248	0.729352	0	0
25/7/2016	0.644763	0.532842	0	0	2.23324	2.31679	1	0	0.297668	0.361512	1	0	19.3736	7.68767	0	2	0.559884	0.287594	1	1	1.75994	2.26894	0	0	0.0862736	0.00489334	0	0	1.64334	0.946129	0	0	0.591373	0.544548	0	0	0.857963	0.718592	0	0
26/7/2016	0.606755	0.526566	1	0	1.93079	2.14248	1	0	0.275838	0.423124	2	0	18.8217	5.25202	0	1	0.809297	0.206622	0	0	2.18924	2.37649	0	0	0.0838283	0.0062934	0	0	1.59035	1.01416	0	0	0.592364	0.52647	0	0	0.900208	0.831562	0	0
27/7/2016	0.572978	0.54296	1	0	1.69231	1.85988	2	0	0.315287	0.280345	1	0	18.0361	5.80638	0	1	0.815547	0.252363	0	0	2.56635	2.57057	0	0	0.0807047	0.0092965	0	0	1.5986	1.02107	0	0	0.616868	0.528555	0	0	0.82135	0.79482	0	0
28/7/2016	0.47122	0.613583	1	0	1.48844	1.72042	0	0	0.347975	0.301476	1	0	17.297	10.0999	0	1	0.578851	0.238225	0	0	2.59481	2.47612	0	0	0.0795731	0.00889553	0	0	1.18963	1.09711	0	0	0.647341	0.56424	0	0	0.779598	0.815548	0	0
29/7/2016	0.574778	0.561434	0	0	2.94384	2.3278	0	1	0.303974	0.256199	1	0	13.3081	6.44409	1	1	0.585378	0.248612	0	0	2.53705	2.40606	0	0	0.0799574	0.01002	0	0	1.04073	1.29648	0	0	0.521833	0.587366	0	0	0.736655	0.851374	0	0
30/7/2016	0.509487	0.616538	0	0	2.22245	1.89751	0	1	0.257068	0.271218	2	0	11.9367	4.38992	0	2	0.343133	0.257133	0	1	2.39302	2.39231	0	0	0.0741647	0.00983686	0	0	0.965547	1.193	0	0	0.518277	0.78524	0	0	0.743682	0.848543	0	0
31/7/2016	0.529677	0.550354	0	0	1.87449	1.71595	0	0	0.233953	0.258948	1	0	13.4953	18.516	0	1	0.249136	0.259307	2	0	2.42469	2.42308	0	0	0.0707289	0.0074828	0	0	1.03928	1.17445	0	0	0.500165	0.788453	0	0	0.803528	0.872569	0	0
1/8/2016	0.550677	0.548735	0	0	1.43719	1.7033	0	0	0.352643	0.252029	1	0	16.2039	3.49783	0	0	0.360925	0.239041	1	1	2.49141	2.47784	0	0	0.0678178	0.00512114	0	0	0.951554	1.22054	0	0	0.552417	0.785428	0	0	0.792687	0.921585	0	0
2/8/2016	0.537416	0.554065	0	0	1.18892	2.27802	1	0	0.306475	0.413279	1	0	14.3479	4.08122	2	1	0.334395	0.210758	1	0	1.87193	2.31811	0	0	0.0667198	0.00842251	0	0	0.942687	1.04255	0	0	0.565042	0.646029	0	0	0.784023	0.980267	0	0
3/8/2016	0.48444	0.468772	0	0	1.14678	2.16259	1	1	0.585831	0.435265	1	0	14.0615	3.68082	1	0	0.341156	0.223078	1	0	2.13811	2.53151	0	0	0.0659679	0.00794131	0	0	0.900359	1.05784	0	0	0.544652	0.67878	0	0	0.794977	0.972994	0	0
4/8/2016	0.359333	0.383108	0	0	1.14712	2.0088	1	1	0.595702	0.389609	1	1	13.7198	4.01838	1	0	0.341331	0.232263	1	0	2.1455	2.33771	0	0	0.0591075	0.0103702	0	0	0.824847	1.1452	0	0	0.504406	0.721479	0	0	0.797107	1.05874	0	0
5/8/2016	0.345097	0.351134	0	0	1.88519	3.64764	1	0	0.577313	0.38618	1	0	14.5862	3.26792	1	0	0.350257	0.138673	1	1	2.21935	2.12406	0	0	0.0598886	0.0101385	0	0	0.853722	1.31074	0	0	0.53119	0.77009	0	0	0.793034	1.00169	0	0
6/8/2016	0.451086	0.385562	0	0	2.47146	3.06997	0	1	0.569055	0.308146	1	0	12.7838	4.27833	1	0	0.351519	0.164892	0	1	2.00128	1.91856	0	0	0.0615486	0.0165406	0	0	0.967362	1.26293	0	0	0.560002	0.739094	0	0	0.790502	1.05818	0	0
7/8/2016	0.385017	0.334003	1	0	2.30031	2.87646	0	0	0.567393	0.33648	1	0	16.2859	2.61075	2	1	0.231381	0.39407	1	2	2.0328	2.03569	0	0	0.059987	0.0140639	0	0	0.906127	1.12204	0	0	0.585618	0.734929	0	0	0.869964	1.05777	0	0
8/8/2016	0.490797	0.411892	1	0	2.11253	2.46079	0	1	0.25523	0.311371	0	0	16.1134	1.85179	2	1	0.332362	0.417423	0	0	1.9432	1.97665	0	0	0.0604814	0.0101128	0	0	0.900898	1.0969	0	0	0.597885	0.773145	0	0	0.846612	0.954747	0	0
9/8/2016	0.482064	0.246316	1	0	2.67743	3.67627	0	0	0.272472	0.232337	0	0	15.4089	2.56455	2	1	0.340381	0.192173	0	2	2.2098	1.94685	0	0	0.0571973	0.00799603	0	0	0.900116	1.13656	0	0	0.651969	0.786617	0	0	0.776599	0.985462	0	0
10/8/2016	0.478854	0.401325	1	0	0.998344	2.78466	1	0	0.277975	0.239219	1	0	16.3469	3.33266	2	1	0.315399	0.319083	1	0	2.08132	2.06331	0	0	0.057892	0.0080217	0	0	1.02929	0.914784	0	0	0.682695	0.782622	0	0	0.84216	0.950357	0	0
11/8/2016	0.490646	0.217107	0	0	0.907542	2.7456	0	2	0.284166	0.227676	1	0	18.2089	4.38323	1	0	0.310463	0.339784	1	0	2.14725	1.72322	0	0	0.0474134	0.00970083	0	0	1.1185	0.94951	0	0	0.685383	0.663531	0	0	0.850707	0.962465	0	0
12/8/2016	0.442164	0.318065	0	0	1.51369	2.92573	0	1	0.376515	0.264873	0	0	18.781	2.36541	2	2	0.318923	0.30621	0	1	2.06152	1.8211	0	0	0.047669	0.00621554	0	0	1.18903	0.913931	0	0	0.664515	0.625997	0	0	0.859332	1.01218	0	0
13/8/2016	0.60811	0.326121	1	0	1.18625	2.91283	1	1	0.309733	0.244578	0	0	17.5867	4.08984	2	2	0.307352	0.339328	0	0	2.29022	1.90855	0	0	0.0491978	0.00424081	0	0	1.43718	0.985377	0	0	0.627599	0.66649	0	0	0.858816	1.00803	0	0
14/8/2016	0.291373	0.33058	1	0	1.30931	2.92117	0	1	0.313084	0.221433	0	0	17.9112	2.27956	2	2	0.305102	0.327455	0	0	2.18219	2.47506	0	0	0.0504392	0.00411132	0	0	1.32738	1.01047	0	1	0.630373	0.61552	0	0	0.921869	0.991172	0	0
15/8/2016	0.299866	0.302863	1	0	1.32398	2.09928	2	1	0.313493	0.202641	0	0	18.3635	2.1785	2	2	0.305236	0.343205	0	0	2.45125	2.54313	0	0	0.048288	0.00524436	0	0	1.40715	0.982386	0	0	0.64515	0.579871	0	0	0.931476	0.971422	0	0
16/8/2016	0.265829	0.201469	1	0	1.32863	2.14183	1	1	0.275701	0.218893	0	0	18.1244	2.44757	2	1	0.306051	0.34512	0	0	2.23382	2.42924	0	0	0.0473054	0.0063914	0	0	1.6975	0.999155	0	0	0.668805	0.62832	0	0	0.880126	0.956149	0	0
17/8/2016	0.255828	0.194396	1	0	1.15894	2.0983	2	1	0.223015	0.224512	0	0	15.8161	4.06069	1	0	0.328634	0.372094	0	0	2.30992	2.3548	0	0	0.0486796	0.0100543	0	0	1.30915	1.06651	0	0	0.608089	0.572937	1	0	0.796145	0.987069	0	0
18/8/2016	0.280752	0.217876	0	0	1.37606	3.04513	1	2	0.273883	0.233152	0	0	14.8124	4.72317	1	0	0.319552	0.383847	1	0	2.3871	2.29366	0	0	0.0411416	0.00575945	0	0	1.11721	1.02778	0	0	0.672011	0.504374	0	0	0.775796	0.975778	0	0
19/8/2016	0.268501	0.1755	0	1	1.39518	2.92092	2	2	0.243845	0.232277	0	0	12.9292	4.90227	2	1	0.309397	0.380945	1	0	2.01051	2.54288	0	0	0.0404279	0.0100154	0	0	1.20924	1.20249	0	0	0.724912	0.491993	0	0	0.688113	0.967973	0	0
20/8/2016	0.274915	0.241829	0	1	1.34918	2.87589	2	2	0.258581	0.167673	0	0	12.2264	5.38474	2	0	0.333207	0.372189	0	0	1.878	2.09282	1	0	0.0385369	0.0164373	0	0	1.11668	1.23172	0	0	0.769076	0.523629	0	0	0.696524	0.942074	0	0
21/8/2016	0.261451	0.198507	0	1	0.806795	1.70303	2	1	0.258228	0.207944	0	0	14.3405	4.92126	2	0	0.348868	0.368865	0	0	2.48984	2.15256	0	0	0.04095	0.017342	0	0	1.26011	1.29056	0	0	0.719852	0.546411	0	0	0.844546	0.955542	0	0
22/8/2016	0.255328	0.233747	0	0	0.912242	1.79023	1	1	0.248579	0.173326	0	0	14.7689	4.86613	2	2	0.225206	0.330492	0	1	2.42933	1.98098	0	0	0.0423886	0.0155521	0	0	1.41054	1.38102	0	0	0.775918	0.547189	0	0	0.835573	0.864288	0	0
23/8/2016	0.301731	0.253019	0	0	1.34697	1.57388	1	2	0.217083	0.17336	0	0	15.6334	4.73252	2	2	0.21734	0.328555	0	0	2.20032	1.99315	0	0	0.0481892	0.0201429	0	0	1.51661	1.51624	0	0	0.779045	0.672795	0	0	0.803621	0.833573	0	0
24/8/2016	0.262707	0.271187	0	0	1.11793	1.63288	2	1	0.16976	0.176911	0	0	13.9689	2.37181	2	2	0.217755	0.244698	1	0	2.1723	2.03533	0	0	0.0440124	0.0145631	0	0	1.21807	1.36138	0	0	0.786298	0.721915	0	0	0.786066	0.830241	0	0
25/8/2016	0.299044	0.280208	0	0	1.40444	0.96746	1	1	0.173659	0.164073	0	0	13.79	4.42083	2	1	0.240464	0.257453	0	1	2.20088	2.02028	0	0	0.0470534	0.0152396	0	0	1.16866	1.16234	0	0	0.755941	0.654888	0	0	0.804588	0.863674	0	0
26/8/2016	0.24636	0.255831	0	0	1.14072	1.05054	1	0	0.203656	0.150312	0	0	15.3721	7.61823	2	1	0.239385	0.257668	0	0	2.0171	2.42123	0	1	0.0474094	0.0187101	0	0	1.02163	1.15533	0	0	0.734644	0.537968	0	0	0.786861	0.91477	0	0
27/8/2016	0.241241	0.275158	1	0	0.924886	1.03373	1	1	0.232158	0.146761	0	0	14.8688	6.95009	3	1	0.247799	0.261568	0	0	2.63845	2.65659	0	0	0.047662	0.0229624	0	0	0.911456	1.18971	0	0	0.726797	0.500912	0	0	0.805957	0.887635	0	0
28/8/2016	0.286393	0.262004	1	1	1.29781	0.933433	1	1	0.205447	0.176193	0	0	14.9955	6.8091	2	1	0.254519	0.259824	0	1	2.27895	2.91423	0	0	0.044808	0.0260792	0	0	0.953973	1.19228	0	0	0.706391	0.60792	0	0	0.900624	0.903999	0	0
29/8/2016	0.343126	0.298587	0	0	1.2821	1.02235	0	1	0.223688	0.185584	0	0	12.7772	4.69162	2	0	0.243598	0.253166	0	0	2.20592	2.92613	0	0	0.0477289	0.0270463	0	0	0.973533	1.16263	0	0	0.704469	0.620596	0	0	0.933972	0.825898	0	0
30/8/2016	0.467548	0.290162	0	1	1.18221	0.722314	1	1	0.219195	0.167751	0	0	20.7423	4.78941	1	3	0.281263	0.255651	0	1	1.99208	2.4357	0	0	0.0512353	0.03036	0	0	0.869366	1.03862	0	0	0.700048	0.542582	0	0	0.875562	0.835068	0	0
31/8/2016	0.38476	0.32368	0	0	1.27721	0.384155	1	1	0.213448	0.193105	0	0	17.2707	4.3187	1	4	0.281524	0.282699	0	0	2.04209	2.93449	0	0	0.0504864	0.0311981	0	0	0.857997	1.03737	0	0	0.740278	0.571349	0	0	0.858302	0.829812	0	0
1/9/2016	0.315538	1.14192	0	0	1.14784	0.450139	0	0	0.210834	0.206494	0	0	9.48951	4.55095	1	2	0.27114	0.267754	0	0	2.23899	2.61075	0	0	0.0545004	0.0302834	0	0	0.928646	1.16031	0	0	0.814234	0.554238	0	0	0.757448	0.848459	0	0
2/9/2016	0.608627	0.419438	0	0	1.78062	1.46163	1	0	0.213607	0.21274	0	0	13.1617	4.99692	2	2	0.274888	0.270368	0	0	1.90507	2.38873	0	0	0.056399	0.0336028	0	0	0.915334	0.873148	0	0	0.729168	0.600065	0	0	0.737928	0.87607	0	0
3/9/2016	0.339832	0.4273	0	0	2.02501	1.63119	0	0	0.235463	0.253421	0	0	12.7957	3.65032	1	2	0.278557	0.280964	0	0	2.21428	2.36972	0	0	0.0557193	0.0335554	0	0	0.884369	0.931825	0	1	0.76727	0.557877	0	0	0.800108	0.88334	0	0
4/9/2016	0.239525	0.49648	0	0	1.57543	0.828621	0	0	0.207902	0.323355	0	0	10.7621	7.97548	1	3	0.255962	0.289646	0	0	2.11255	2.55897	0	0	0.0531642	0.0359569	0	0	1.04486	0.886435	0	1	0.608947	0.597798	0	0	0.824185	0.950815	0	0
5/9/2016	0.244939	0.471187	1	0	1.74323	0.747431	1	0	0.155216	0.302792	0	0	10.0447	7.36134	1	2	0.265162	0.297356	0	0	2.00147	2.11408	0	0	0.0553064	0.0433156	0	0	0.98291	1.02182	0	1	0.712099	0.599517	0	0	0.824669	0.881698	0	0
6/9/2016	0.205435	0.403863	0	0	1.75065	0.985193	1	0	0.147158	0.138308	0	0	10.4049	7.4884	0	3	0.279309	0.299495	0	0	2.09103	2.08691	0	0	0.0650279	0.0513137	0	0	1.03595	0.886194	0	1	0.797165	0.660485	0	0	0.763449	0.873676	0	0
7/9/2016	0.225433	0.414214	1	0	1.93555	1.03409	1	0	0.146322	0.119615	0	0	9.90769	6.70469	0	3	0.276441	0.301011	0	0	2.28044	1.92683	0	0	0.0761219	0.0508934	0	0	0.99273	0.949691	0	1	0.671765	0.544937	0	0	0.805781	0.8684	0	0
8/9/2016	0.411662	0.433071	2	0	1.71287	0.651678	1	0	0.139302	0.111941	0	0	7.68251	9.0852	0	2	0.375503	0.315992	0	0	2.11203	2.05129	0	0	0.073627	0.0526087	0	0	1.09485	1.10565	0	0	0.665195	0.512902	0	0	0.802567	0.898083	0	0
9/9/2016	0.395832	0.386715	2	0	1.76812	0.710111	0	0	0.19456	0.129093	0	0	9.40521	6.12558	0	1	0.274552	0.294209	0	0	2.25403	2.08054	0	0	0.0867617	0.0558573	0	0	1.1246	1.0538	0	0	0.661933	0.499149	0	0	0.843175	0.909525	0	0
10/9/2016	0.288938	0.494414	2	0	1.79238	0.754936	1	1	0.201803	0.140316	1	0	7.52563	6.03128	0	2	0.26889	0.237625	0	0	2.20116	2.11356	0	0	0.0897621	0.0627082	0	0	1.10442	1.01238	0	0	0.799464	0.518425	0	0	0.835642	0.909692	0	0
11/9/2016	0.335258	0.483082	2	0	1.91453	0.695719	1	0	0.165419	0.131314	1	0	8.13017	9.00578	0	2	0.284118	0.23373	0	0	2.24908	2.11667	0	0	0.0951905	0.0685419	0	0	1.14614	1.03134	0	0	0.756752	0.536319	0	0	0.790152	0.936787	0	0
12/9/2016	0.411728	0.488062	1	0	1.55519	0.585607	0	1	0.140998	0.0923647	3	0	15.4251	9.00029	0	1	0.288132	0.22541	0	0	2.39154	2.03809	0	0	0.0998934	0.0702462	0	0	1.13271	1.35218	0	0	0.824381	0.523073	0	1	0.792775	0.857933	0	0
13/9/2016	0.330512	0.328014	0	0	1.59366	0.689045	0	0	0.129162	0.089058	2	0	10.1435	9.05593	0	1	0.368258	0.196864	0	0	2.43921	1.93297	0	0	0.108179	0.0717941	0	0	1.11998	1.32522	0	0	0.851346	0.544441	0	0	0.804332	0.858178	0	0
14/9/2016	0.392783	0.360896	0	0	1.51214	0.691375	0	0	0.133827	0.108545	2	0	10.2898	8.85365	0	1	0.362924	0.201274	0	0	2.17733	2.3371	0	0	0.114652	0.0791864	0	0	1.15867	1.27185	0	0	0.815471	0.501727	0	0	0.797704	0.886594	0	0
15/9/2016	0.561245	0.295452	0	0	1.33782	0.876478	1	0	0.1379	0.107196	2	0	15.1059	10.0722	1	0	0.368411	0.220322	0	0	2.1656	2.24267	0	0	0.11698	0.0840772	0	0	1.14366	1.15065	0	0	0.768313	0.474775	0	0	0.813805	0.892112	0	0
16/9/2016	0.40562	0.254911	0	0	1.14056	0.700086	0	0	0.136472	0.0835781	2	0	10.7595	10.1888	0	0	0.36925	0.197274	0	0	1.92883	2.31695	0	0	0.131323	0.0987693	0	0	1.09089	1.12738	0	0	0.674639	0.537454	0	0	0.836823	0.933593	0	0
17/9/2016	0.370603	0.265042	0	0	1.21342	0.76487	0	0	0.150703	0.111641	2	0	10.9595	9.16417	0	0	0.39914	0.213657	0	0	1.76708	2.55017	0	0	0.144533	0.095055	0	0	1.06359	1.12857	0	0	0.667418	0.531494	0	0	0.83968	0.975559	0	0
18/9/2016	0.419219	0.301838	0	1	1.23576	0.699081	0	0	0.138373	0.116826	2	0	11.5145	8.98306	0	0	0.401922	0.213661	0	0	1.88865	2.52892	0	0	0.153132	0.102802	0	0	1.20154	1.14452	0	0	0.615543	0.498645	0	0	0.789797	0.946469	0	0
19/9/2016	0.426272	0.281202	0	1	1.13781	0.542633	0	0	0.145383	0.126935	2	0	15.0233	9.16266	0	0	0.395275	0.203435	0	0	1.97184	2.34897	0	0	0.157846	0.113542	0	0	1.10921	1.18162	0	0	0.594911	0.469476	0	0	0.819004	0.872928	0	0
20/9/2016	0.479211	0.341338	0	0	0.911412	0.514505	0	1	0.152001	0.0983523	2	1	11.5313	9.15218	0	1	0.428583	0.217587	0	0	1.88754	2.13473	0	0	0.166419	0.129418	0	0	1.07616	1.10526	0	0	0.623613	0.50814	0	0	0.85329	0.86182	0	0
21/9/2016	0.412872	0.462213	0	0	1.0094	1.62323	0	0	0.168938	0.0976644	1	1	12.262	16.8126	0	1	0.446875	0.221459	0	0	1.93707	2.31808	0	0	0.177316	0.14491	0	0	1.1183	1.24188	0	0	0.564936	0.513737	0	0	0.8593	0.876542	0	0
22/9/2016	0.366996	0.484705	0	0	0.967649	1.52604	1	0	0.147534	0.131251	1	1	10.6598	12.9924	1	1	0.432492	0.21035	0	0	1.98033	2.13261	0	0	0.183762	0.151068	0	0	1.15322	1.14307	0	0	0.575392	0.607221	0	0	0.830591	0.940562	0	0
23/9/2016	0.410043	0.313902	0	0	0.752817	1.60432	1	0	0.299478	0.108679	1	1	14.4136	7.45306	0	2	0.414544	0.311388	0	0	2.75224	2.19132	0	0	0.142359	0.157317	0	0	1.05181	1.06097	0	0	0.560612	0.593567	0	0	0.771239	0.911129	0	0
24/9/2016	0.426116	0.477679	0	0	0.842585	1.58103	1	0	0.306485	0.116861	1	1	10.9732	14.4604	0	0	0.421729	0.322894	0	0	2.64256	2.17696	0	0	0.158135	0.167351	0	0	1.0168	1.09309	0	0	0.628929	0.45654	0	1	0.810477	0.951015	0	0
25/9/2016	0.462518	0.432082	0	0	0.741882	2.33606	1	0	0.297639	0.107886	0	1	14.3691	10.8507	0	0	0.433873	0.328832	0	0	2.60187	2.27921	0	0	0.230049	0.178347	0	0	1.20205	1.09537	0	0	0.630924	0.43153	0	1	0.839638	0.945852	0	0
26/9/2016	0.425542	0.460118	0	0	0.684973	2.37194	1	0	0.244712	0.137686	0	1	14.9625	11.5812	0	1	0.424668	0.323537	0	0	2.85022	2.42246	0	0	0.235287	0.190991	0	0	1.15062	1.00284	0	0	0.607383	0.448743	0	0	0.824032	0.870289	0	0
27/9/2016	0.51137	0.488461	1	0	0.679969	2.3502	2	0	0.165233	0.151381	0	1	19.6652	10.5489	0	0	0.428292	0.307262	0	0	2.41241	2.55777	0	0	0.243937	0.153564	0	0	1.41855	1.01671	0	0	0.570849	0.488155	0	0	0.811855	0.918078	0	0
28/9/2016	0.443036	0.498005	0	0	0.6138	2.33448	1	0	0.174075	0.163604	0	0	11.8622	7.87591	0	0	0.407872	0.32388	0	0	2.43925	2.68287	0	0	0.254548	0.164305	0	0	1.43675	1.12614	0	0	0.549204	0.489789	0	0	0.818747	0.888884	0	0
29/9/2016	0.334542	0.529267	0	0	0.685354	1.33066	0	0	0.234748	0.180188	0	0	18.5047	13.1367	0	1	0.399543	0.318435	0	0	2.45688	2.63382	0	0	0.261795	0.173747	0	0	1.39505	1.23242	0	0	0.533334	0.474014	0	0	0.799725	0.803551	0	0
30/9/2016	0.534194	0.279636	0	1	0.274989	1.43016	1	0	0.190423	0.164616	0	0	18.7486	11.8386	0	1	0.412705	0.348449	0	0	2.39321	2.61773	0	0	0.279342	0.18681	0	0	1.73511	1.34322	0	0	0.509542	0.531755	0	0	0.933034	0.863482	0	0
1/10/2016	0.279226	0.905043	0	0	0.240583	1.81568	2	0	0.351208	0.152288	0	0	14.7919	22.1823	0	0	0.434267	0.339443	0	0	2.2034	2.66223	0	0	0.299577	0.201892	0	0	1.76026	1.25214	0	0	0.510701	0.495472	0	0	0.946388	0.848556	0	0
2/10/2016	0.391138	0.509638	0	0	0.234818	1.81934	2	1	0.247723	0.145541	0	0	19.8047	15.3307	1	1	0.530584	0.320291	0	0	2.29737	2.65989	0	0	0.207561	0.278197	0	0	1.63247	0.961158	0	0	0.53138	0.73499	0	0	0.962484	0.832096	0	0
3/10/2016	0.396506	0.245996	0	0	0.30714	1.61718	1	0	0.225881	0.175261	0	0	18.6764	15.5774	1	1	0.499613	0.3366	0	0	2.52832	2.57664	0	0	0.222108	0.296802	0	0	1.39004	1.07411	0	0	0.972856	0.706478	0	0	0.899621	0.802944	0	0
4/10/2016	0.412559	0.373798	0	0	0.734159	1.99168	0	0	0.298181	0.149259	0	1	18.2275	9.11855	0	2	0.497565	0.356533	0	0	2.31297	2.44022	0	0	0.23126	0.311836	0	0	1.33382	1.26769	0	0	0.949804	0.542227	0	0	0.846267	0.847868	0	0
5/10/2016	0.492438	0.394485	0	0	0.984623	1.75527	0	0	0.214303	0.161061	0	0	23.9974	8.82526	0	0	0.503783	0.376307	0	0	2.86296	2.43678	0	0	0.146408	0.286922	0	0	1.29389	1.38922	0	0	0.814205	0.473432	1	0	0.967959	0.84416	0	0
6/10/2016	0.407406	0.444741	0	0	0.938212	1.73299	0	0	0.252049	0.151951	0	0	24.8638	26.2287	0	0	0.563823	0.247695	0	0	2.46717	2.77854	0	0	0.158151	0.210675	0	0	1.23573	1.33862	0	0	0.669942	0.406978	0	1	0.987486	0.876594	0	0
7/10/2016	0.405832	0.544737	0	0	0.883007	1.84788	0	0	0.320679	0.159853	0	1	22.7608	20.079	0	1	0.525103	0.301595	0	0	3.02903	2.74467	0	0	0.169307	0.21533	0	0	1.44739	1.45547	0	0	0.697192	0.369706	1	0	0.928268	0.88797	0	0
8/10/2016	0.353965	0.611118	0	0	0.957009	2.12179	0	0	0.220856	0.190805	0	0	23.8009	20.7422	0	0	0.552396	0.306567	0	0	2.68552	2.5834	0	0	0.182321	0.221333	0	0	1.56227	1.34792	0	0	0.704284	0.391703	1	0	0.932367	0.877994	0	0
9/10/2016	0.408562	0.348474	0	0	1.02392	1.52623	0	0	0.218108	0.192649	0	0	33.9694	23.2463	0	0	0.567445	0.307244	0	0	2.78305	2.18262	0	0	0.186369	0.316304	0	0	1.4961	1.25873	0	0	0.695341	0.452182	0	0	1.08081	0.936165	0	0
10/10/2016	0.394322	0.361553	0	0	1.04289	1.52565	0	0	0.204941	0.17896	0	0	25.8011	19.9535	0	1	0.673737	0.297336	0	0	2.19853	2.91944	1	0	0.256649	0.319803	0	0	1.62067	1.3144	0	0	0.865248	0.706378	0	0	0.919651	0.95811	0	0
11/10/2016	0.621391	0.822671	0	0	0.833072	1.56682	0	0	0.196232	0.183701	0	0	27.3594	32.1476	1	0	0.684366	0.264342	0	0	2.61588	2.74848	0	0	0.194673	0.280867	0	0	1.57024	1.34764	0	0	0.858893	0.803614	0	0	1.00819	1.00506	0	0
12/10/2016	0.396231	0.405705	0	0	0.390619	2.13698	0	1	0.178324	0.177483	0	0	26.0914	20.2905	1	0	0.556811	0.266133	0	0	2.54699	3.22022	0	0	0.180416	0.292104	0	0	1.57489	1.16392	0	0	1.06291	0.690681	0	0	1.05973	0.989587	0	0
13/10/2016	0.374003	0.570377	0	0	0.398947	1.68549	0	1	0.156341	0.182063	0	0	26.6794	26.7116	1	0	0.579332	0.269935	0	0	2.60051	2.67155	0	1	0.233565	0.299327	0	0	1.53494	1.35199	0	0	1.26217	0.772546	0	0	1.06895	0.951787	0	0
14/10/2016	0.392873	0.508042	1	0	0.4148	1.31931	0	1	0.167494	0.184005	0	0	25.4128	23.1876	1	0	0.561722	0.27196	0	0	2.58463	2.4822	0	0	0.194228	0.365914	0	0	1.18283	1.36972	0	0	1.24437	0.777942	0	0	1.16149	1.01422	0	0
15/10/2016	0.503568	0.602549	2	0	0.370597	1.48285	0	1	0.166813	0.158994	0	0	37.2455	23.5936	1	0	0.559692	0.319908	0	0	2.38296	2.47632	0	0	0.195975	0.37555	1	0	1.2127	1.38957	0	0	1.3346	0.775462	0	0	1.05736	0.779352	0	0
16/10/2016	0.567498	0.549284	1	0	0.351004	1.52569	0	1	0.163363	0.196828	0	0	28.793	23.4076	1	0	0.633981	0.316295	0	0	2.0391	2.93412	0	0	0.200507	0.323665	1	0	1.30879	1.39053	0	0	1.3255	0.599138	0	0	0.938542	0.8427	0	0
17/10/2016	0.562532	0.792272	0	0	0.75289	1.54723	1	1	0.153072	0.230967	0	1	30.406	22.5094	0	0	0.629741	0.331315	0	0	2.05773	4.41943	0	0	0.271018	0.324841	1	0	1.24288	1.46317	0	0	1.34557	0.787414	0	0	0.923961	0.927126	0	0
18/10/2016	0.451729	0.731961	0	0	0.816471	1.23763	0	0	0.152591	0.243869	0	1	30.4823	17.0936	0	0	0.619437	0.340422	0	0	1.97137	3.76314	0	0	0.279901	0.316089	1	0	1.29119	1.34543	0	1	1.08389	0.61994	0	0	0.96897	0.924712	0	0
19/10/2016	0.400864	1.07978	0	0	0.799165	1.21034	1	1	0.163373	0.234542	0	1	21.4765	16.7236	0	1	0.603728	0.355199	0	0	2.36637	8.53957	0	0	0.325294	0.360474	1	0	1.48862	1.27317	0	0	0.96532	0.503876	0	0	0.903103	0.92918	0	0
20/10/2016	0.65385	1.42265	0	0	0.321337	1.0945	0	1	0.148739	0.250207	0	0	22.2257	22.6738	0	0	0.659269	0.355346	0	0	2.66538	8.48754	0	0	0.284168	0.305816	1	1	1.49002	1.23278	0	0	1.43978	0.648883	0	0	0.921777	0.98012	0	0
21/10/2016	0.871668	1.17063	0	0	0.376102	1.41133	1	1	0.145355	0.262096	0	2	24.629	18.3349	1	0	0.641786	0.4433	0	0	2.72296	8.25951	0	0	0.300265	0.334244	0	1	1.49378	1.45437	0	0	1.42916	0.640646	0	0	0.917614	1.00906	0	0
22/10/2016	0.411576	1.20284	2	0	0.396358	1.95667	0	0	0.15306	0.537285	0	1	17.5715	31.563	1	0	0.509657	0.491793	0	0	2.41181	8.06218	0	1	0.296616	0.339892	0	1	1.92721	1.3388	0	0	1.11289	0.726405	0	0	0.980011	1.08582	0	0
23/10/2016	0.512879	1.01992	0	0	0.410094	1.6869	1	0	0.21692	0.538507	0	1	45.6237	47.375	1	0	0.526572	0.523781	0	0	2.17519	8.1998	0	1	0.228569	0.277591	0	2	1.93001	1.27153	0	0	0.904767	0.575488	0	0	0.975772	0.994341	0	0
24/10/2016	0.565899	0.866824	0	0	1.10127	1.29376	0	0	0.218616	0.40472	0	1	45.4549	40.3773	0	0	0.449211	0.445388	0	0	2.50976	9.01103	0	0	0.270852	0.280393	0	2	2.01014	1.2026	0	1	0.841244	0.55917	0	0	1.011	1.01141	0	0
25/10/2016	0.830255	0.741642	0	0	1.16396	1.68559	1	0	0.220633	0.493176	0	1	54.5751	52.251	0	0	0.537817	0.421557	0	0	3.19825	10.3088	1	0	0.401544	0.319616	0	2	1.93235	1.3994	0	0	0.862872	0.615346	0	0	0.999297	1.0197	0	0
26/10/2016	0.950771	0.884205	0	0	2.25254	1.7214	0	1	0.228191	1.03678	0	1	66.6244	41.3358	0	0	0.526614	0.436418	0	0	3.084	9.37447	0	0	0.401079	0.33707	0	1	1.78201	1.61988	0	0	0.702842	0.625946	0	0	1.04527	1.03469	0	0
27/10/2016	0.822371	2.04635	0	0	2.45508	2.07465	0	0	0.260813	1.02549	0	0	60.0682	51.1171	0	0	0.554767	0.432053	0	0	3.30885	9.17374	0	0	0.398438	0.337999	1	1	1.42074	1.53019	0	0	0.698077	0.696531	0	0	1.23414	0.963347	0	0
28/10/2016	0.812203	1.98837	0	1	2.30661	2.24233	0	1	0.324661	1.00834	0	0	49.9912	48.0733	0	1	0.590712	0.417179	0	0	3.93092	8.49324	0	0	0.383625	0.373573	1	1	1.97328	1.865	0	0	1.03841	0.755296	0	0	1.23769	0.970002	0	0
29/10/2016	2.03141	0.85822	0	0	2.24661	2.27653	0	2	0.34365	0.980232	0	0	41.697	43.1418	0	0	0.605765	1.05155	0	0	3.50232	7.58751	0	0	0.46509	0.324487	1	2	1.80373	1.87829	0	0	1.21075	0.95834	0	0	1.07907	0.933376	0	0
30/10/2016	1.78077	1.25059	1	0	2.18895	3.49497	0	1	0.715759	1.02742	0	0	34.9653	43.5295	0	0	0.608286	1.15775	0	0	4.38888	6.65773	0	1	0.402308	0.33156	2	1	1.77718	1.54253	0	0	1.00089	0.893528	0	0	0.974013	0.954713	0	0
31/10/2016	2.32367	1.2832	1	0	2.97892	3.43957	0	0	0.393975	0.963347	0	0	30.107	56.7916	0	0	0.605986	1.18802	0	0	5.32123	3.69522	0	2	0.40267	0.471676	2	0	1.87813	1.83773	0	0	1.01397	0.885486	0	0	1.15401	0.857808	0	0
1/11/2016	1.70767	1.00563	0	0	2.96633	2.80374	0	0	0.442635	0.959088	1	1	33.7106	57.0969	0	1	0.575555	0.909986	0	0	5.64287	5.51675	0	1	0.424234	0.512046	1	0	1.98775	1.84837	0	0	1.05797	0.816149	0	0	1.15035	0.952461	0	0
2/11/2016	0.894633	0.712776	1	0	2.92743	2.41834	0	0	0.33661	0.930319	1	2	30.7898	53.8581	0	1	0.680846	0.93897	0	0	5.2762	7.90375	0	1	0.419287	0.583572	1	0	2.03182	1.7621	0	0	1.09335	0.993827	0	0	1.23706	1.28598	0	0
3/11/2016	1.09875	1.97368	1	0	2.37851	2.169	0	0	0.320845	1.11058	0	0	37.2791	48.3151	0	1	0.678469	1.02652	0	0	4.63092	3.07074	0	0	0.470081	0.570545	1	0	1.93399	1.2745	0	0	1.08689	1.05504	0	0	1.12769	1.34402	0	0
4/11/2016	1.18099	0.660852	0	0	2.39418	2.33984	0	0	0.340652	3.99722	0	0	39.0339	40.0405	1	1	0.644806	0.971276	0	0	5.39655	3.54857	0	0	0.474984	0.581701	2	0	2.66742	1.47449	0	0	1.30752	0.981065	0	0	1.21934	1.34169	0	0
5/11/2016	0.885959	0.471805	1	0	2.38692	2.1083	0	0	0.319843	3.92499	0	0	44.0413	42.5931	0	1	0.663901	0.956921	0	0	5.55309	3.57754	0	0	0.455564	0.595155	2	0	2.36096	1.34337	0	1	1.35861	0.976333	0	0	1.05714	1.35629	0	0
6/11/2016	0.707874	0.457037	0	0	2.46525	2.17771	0	0	0.258986	3.64715	1	0	44.2852	42.609	0	0	0.639949	0.884719	0	0	5.08256	3.36559	0	0	0.45718	0.507818	2	0	2.50144	1.35756	0	1	1.28003	1.01384	0	0	1.05442	1.26261	0	0
7/11/2016	1.05037	0.600495	1	0	2.40761	2.26307	0	0	0.222099	3.90768	2	0	47.3964	43.1953	0	0	0.663086	0.84628	0	0	5.70388	3.24973	0	1	0.468234	0.506126	2	0	2.82352	1.12744	0	0	1.17093	0.989138	0	0	1.32868	1.24186	0	0
8/11/2016	1.19509	1.61489	1	0	1.61809	1.99896	1	0	0.232471	1.27784	1	1	42.1795	50.0643	0	0	0.752431	0.881837	0	0	6.40894	3.78681	0	1	0.494615	0.499515	1	0	2.68934	1.4058	0	0	1.38519	0.983243	0	0	1.15437	1.30654	0	0
9/11/2016	1.12036	1.07502	0	0	1.77018	6.18869	0	0	0.280566	1.49888	1	0	38.8382	44.0413	0	0	0.617364	0.967266	0	0	7.21375	3.57868	0	1	0.558309	0.516976	1	1	1.95158	1.41606	0	0	1.41736	1.3965	0	0	1.30221	1.36399	0	1
10/11/2016	1.18921	0.892214	0	0	1.87998	6.31979	0	0	0.295926	0.374344	1	0	39.9314	55.973	1	0	0.661509	0.986758	0	0	6.43656	3.2012	0	0	0.550337	0.573423	2	1	2.05564	1.71652	0	0	1.48756	1.54871	0	0	1.04159	1.28061	0	0
11/11/2016	3.22245	0.863269	0	1	2.70599	6.25281	0	1	0.279304	0.308312	1	0	53.9716	47.0867	0	0	0.707748	1.1887	0	0	4.60514	3.30873	0	1	0.521331	0.563633	2	1	2.24198	1.66905	0	0	1.47807	1.60307	0	0	1.16994	1.37704	0	0
12/11/2016	1.49051	0.895914	1	0	2.89391	2.05353	0	1	0.323699	0.311985	1	0	39.4727	43.632	0	0	0.671138	1.13792	0	0	4.67696	3.85082	0	0	0.612829	0.613521	1	1	2.47384	1.65765	0	0	1.65154	1.67126	0	0	1.15661	1.38827	0	0
13/11/2016	3.75648	0.722997	1	1	4.1661	2.3709	0	0	0.757636	0.328832	0	0	46.4766	43.6229	0	0	0.872986	1.39777	0	0	4.94916	2.81704	0	0	0.635385	0.612636	1	1	2.57779	1.59116	0	0	1.2663	1.67657	0	0	1.08885	1.4238	0	0
14/11/2016	2.79407	0.747222	0	0	4.19589	2.96384	0	0	1.27783	0.34033	0	0	44.6266	39.6959	0	0	0.860785	1.2088	0	0	6.1287	2.96372	0	0	0.586151	0.658222	1	0	2.57016	1.77523	0	0	1.22073	1.10028	0	0	1.06144	1.18955	0	0
15/11/2016	2.03683	0.693788	1	0	4.57473	2.71774	0	1	1.17226	0.286212	0	0	31.5811	45.1673	0	0	1.29038	1.44657	0	0	6.72994	2.83531	0	0	0.625045	0.657987	0	0	1.85105	1.48474	0	0	1.1988	1.17678	0	0	1.16388	1.251	0	0
16/11/2016	1.90069	1.04947	1	0	3.81981	3.05053	0	0	1.03643	0.490878	1	1	32.1543	43.433	0	0	1.48088	1.39017	0	0	7.28699	4.00923	0	0	0.644909	0.644341	0	0	1.79247	1.49769	0	0	1.27939	1.38751	0	0	1.21722	1.28161	0	0
17/11/2016	1.89168	0.992812	0	0	3.21707	3.28175	0	0	0.965559	0.568079	1	0	44.5122	61.4513	0	0	1.3843	1.48427	0	0	7.34616	3.79416	0	1	0.673509	0.640801	0	0	1.75864	1.7489	0	0	1.27251	1.38008	0	0	1.21013	1.36228	0	0
18/11/2016	1.26254	1.22732	0	0	3.23209	3.94203	0	0	0.563321	0.7336	1	0	46.385	64.1305	0	0	0.8706	1.43565	0	0	5.4926	3.01638	0	0	0.640321	0.602381	0	0	2.02731	1.82944	0	0	1.2883	1.78927	0	0	1.2328	1.35928	0	0
19/11/2016	1.39734	1.09957	0	0	4.14215	4.45601	0	0	0.832443	0.877513	0	0	41.9616	57.1239	0	0	1.52689	1.45229	0	0	6.10355	3.21198	0	0	0.675941	0.619617	0	0	1.96214	1.92582	0	0	1.375	1.33982	0	0	1.52323	1.37416	0	0
20/11/2016	1.61481	0.813388	0	2	3.55673	5.55513	0	0	0.982716	0.971534	0	0	39.6537	60.0079	0	0	1.67162	1.39476	0	0	5.67662	2.74812	0	0	0.680458	0.67661	0	0	1.91743	2.00232	0	0	0.902206	1.51186	0	0	1.51907	1.49158	0	0
21/11/2016	1.98156	1.90281	0	0	3.47053	5.55681	0	0	0.979153	0.908217	0	0	38.433	61.545	0	0	1.64489	1.30374	0	0	7.20581	5.14263	0	0	0.729943	0.724528	0	0	2.04114	1.912	0	0	1.30939	1.11992	0	0	1.54655	1.01198	0	0
22/11/2016	1.6941	1.32139	0	0	3.62258	5.99701	0	0	0.841855	0.723761	0	0	37.6185	66.7934	0	0	1.84667	1.29679	0	0	9.61373	4.33055	0	1	0.706372	0.694503	0	0	1.70321	1.72994	0	0	1.30871	1.01231	0	0	1.50733	1.41172	0	0
23/11/2016	1.8067	1.44727	0	0	3.52211	7.33461	0	0	0.757765	1.06023	0	0	38.1867	68.1026	0	0	1.82226	0.997848	0	0	4.44197	4.64592	0	0	0.705096	0.706323	0	0	1.71248	1.83081	0	0	1.83071	0.970287	0	0	1.53609	1.27128	0	0
24/11/2016	2.09322	1.35902	2	0	3.7615	7.04996	0	0	0.940281	0.827271	1	0	50.8498	66.4977	0	0	1.58153	1.631	0	0	4.76071	5.34383	0	1	0.714154	0.694748	0	0	1.509	2.52406	0	0	1.50611	0.805982	0	0	1.54592	1.13668	0	0
25/11/2016	1.53024	1.27515	0	1	6.25038	6.21056	0	0	1.34326	1.28901	2	0	78.2912	65.1074	0	0	1.73058	1.3905	0	0	8.60845	10.4055	0	1	0.733629	0.700617	0	0	1.54253	2.49856	0	0	1.6026	0.821541	0	0	1.29727	1.13427	0	0
26/11/2016	2.44561	1.2464	0	0	7.41172	5.77154	0	0	1.04138	1.30603	1	0	38.4057	72.9942	0	0	2.08586	1.75644	0	0	7.69233	4.72014	0	1	0.732211	0.681386	0	0	1.43856	2.68476	0	0	1.16069	0.746818	0	0	1.23488	1.06732	0	0
27/11/2016	2.09177	0.80622	0	0	7.14729	5.63581	0	0	0.974637	1.40769	1	0	36.233	73.0609	0	0	1.90207	1.37641	0	0	5.57585	12.7709	0	0	0.776717	0.736425	0	0	1.81133	2.21128	0	0	1.01796	0.957745	0	0	1.27268	1.06361	0	0
28/11/2016	2.71828	0.916867	0	0	7.83287	5.39574	0	0	0.742584	1.62563	1	0	44.1023	92.465	0	0	2.02632	1.59009	0	0	6.25112	12.8153	0	0	0.780742	0.764283	0	0	1.91023	1.6647	0	1	0.969468	1.03305	0	0	1.29108	0.970646	0	0
29/11/2016	1.89093	1.25298	0	1	7.08232	5.67946	0	0	0.94585	1.76516	1	0	35.3904	85.6186	0	0	2.32628	1.71923	0	0	7.28869	13.7234	1	1	0.740777	0.784625	0	0	1.9983	1.77973	0	0	1.17853	0.912081	0	0	1.24909	0.987652	0	0
30/11/2016	2.69498	1.25666	0	0	6.27755	5.25218	0	0	1.24061	2.56825	0	0	51.8666	78.3189	0	0	2.28811	2.04955	0	0	10.6759	13.4644	0	0	0.740166	0.784065	0	0	2.96749	1.68085	0	0	1.43877	1.13946	0	0	1.4176	1.0306	0	0
1/12/2016	2.02373	0.896652	1	0	6.04279	5.38258	0	0	1.74433	2.41561	0	1	63.7664	75.919	0	0	2.20718	1.82136	0	0	13.779	14.4956	0	0	0.698282	0.773694	0	0	3.17627	1.60545	0	0	1.3361	0.991189	0	0	1.42424	1.04955	0	0
2/12/2016	1.93762	1.27308	1	0	6.97687	5.4531	0	0	1.91683	2.19112	0	1	65.833	73.5479	0	0	1.99788	1.53089	0	0	12.768	9.21486	0	0	0.747565	0.785662	0	0	3.42206	1.43961	0	0	1.418	1.18102	1	0	1.48	1.07427	0	0
3/12/2016	2.99398	1.31667	1	0	9.99438	4.76549	0	0	2.17607	2.96154	0	0	71.6782	72.4335	0	0	1.81477	1.50669	0	0	10.9689	9.2415	0	0	0.756334	0.787646	0	0	3.05514	1.71297	0	0	1.74963	1.14176	1	0	1.53352	1.09546	0	0
4/12/2016	2.50483	1.35194	0	0	9.61878	4.54638	1	0	3.37439	2.99156	0	0	69.5462	95.6255	0	0	2.30829	1.44098	0	0	15.8402	12.0805	0	0	0.769727	0.792932	0	0	2.91816	1.71843	0	0	1.75823	0.795906	0	2	1.59416	1.22246	0	0
5/12/2016	5.47597	1.3502	1	0	9.22034	5.1836	2	0	3.38888	3.11452	0	0	60.6003	93.6167	0	0	2.54872	1.43122	0	0	11.2815	15.526	0	0	0.675466	0.799654	0	0	2.98901	1.70634	0	0	2.19298	0.85824	0	0	1.55836	1.31504	0	0
6/12/2016	7.94049	1.46361	0	0	8.90745	4.44694	1	1	3.18338	3.18077	0	0	83.4603	68.6734	0	0	2.66551	1.43698	0	0	13.934	13.4811	0	0	0.694905	0.747403	0	0	2.46498	2.02451	0	0	2.2988	0.688191	0	2	1.3992	1.19214	0	0
7/12/2016	3.62213	1.58162	0	0	9.36516	7.35756	0	0	3.32298	3.29144	0	0	62.0461	62.7655	0	0	2.89064	1.48371	0	0	12.6868	14.1946	0	0	0.700879	0.74275	0	0	3.1965	1.68172	0	0	2.48272	0.895061	1	0	1.42242	1.73683	0	0
8/12/2016	2.03761	1.4553	1	1	10.9734	9.00352	0	0	3.87991	3.4016	0	0	38.2551	69.1871	0	0	3.08433	1.75094	0	0	11.7805	14.5042	0	0	0.700197	0.736024	0	0	2.11676	1.96449	0	0	2.64686	1.08155	0	0	1.6665	1.2113	0	0
9/12/2016	7.85262	1.41008	0	0	14.2311	8.24057	0	0	3.95055	3.49956	0	0	37.7444	81.3631	0	0	3.16417	1.91044	0	0	13.5738	10.7567	1	0	0.737287	0.731903	0	0	1.98671	1.98598	0	0	2.19666	2.42031	0	0	1.77167	1.34889	0	0
10/12/2016	6.15274	1.1969	0	0	13.959	8.28373	0	0	3.43658	3.61621	0	0	52.3653	80.0043	1	0	3.18154	2.0834	0	0	17.6909	14.6341	1	0	0.739827	0.729798	0	0	2.30295	2.015	0	0	1.81558	1.30014	0	1	1.49905	1.44238	0	0
11/12/2016	2.10472	1.81769	0	0	10.4056	7.56974	0	0	3.27877	3.75123	1	0	39.4898	83.1167	0	0	3.56374	2.29201	1	0	17.446	12.584	0	0	0.742696	0.733984	0	0	3.59584	2.08577	0	0	1.48275	1.3058	0	0	1.60358	1.45332	0	0
12/12/2016	1.96368	1.53876	0	1	11.096	8.42432	0	0	3.82583	3.83779	0	0	45.9246	76.7893	0	0	3.97717	2.42025	0	0	18.9519	11.932	0	0	0.727115	0.731686	0	0	3.07373	2.29857	0	0	1.12344	1.73322	0	0	1.58191	1.3647	0	0
13/12/2016	1.97165	0.771436	0	1	11.8409	8.30589	0	0	4.49315	3.60908	0	0	39.1541	63.0033	0	0	4.05402	2.48024	1	0	14.9054	13.4914	0	0	0.719381	0.720514	0	0	2.86102	2.31571	0	0	1.03765	1.70098	0	0	1.40257	1.20827	0	1
14/12/2016	3.63977	2.04001	0	0	16.8123	8.57935	0	0	4.9912	3.55448	0	0	54.9239	63.1632	0	0	3.68703	2.28899	1	0	12.8873	17.4314	0	0	0.723166	0.722224	0	0	3.09779	2.46894	0	0	1.14172	1.65469	0	0	1.336	1.37725	0	1
15/12/2016	6.74282	2.38782	0	0	17.1855	10.9263	0	0	4.8731	2.78748	1	1	37.0636	95.3275	0	0	3.76673	2.51435	1	0	11.5843	14.3613	0	0	0.773002	0.725054	0	0	2.96451	2.29527	0	0	1.70911	1.65129	0	0	1.33135	1.38341	0	1
16/12/2016	6.14425	0.729342	0	0	17.7045	9.71936	0	0	3.52027	2.69969	1	1	57.2018	72.5662	0	0	4.29566	2.24661	0	0	10.9667	9.30037	0	0	0.788006	0.766713	0	0	2.62741	2.42272	0	0	1.72562	2.00068	0	0	1.42844	1.38728	0	0
17/12/2016	4.29198	1.59794	0	0	18.4169	10.3921	0	0	4.80578	2.82757	1	1	55.7892	69.7226	0	0	5.44197	2.45852	0	0	8.85024	9.08316	0	0	0.795634	0.761632	0	0	2.61596	2.19711	0	0	2.07566	2.25241	0	0	1.42543	1.2609	0	0
18/12/2016	2.74413	1.56241	0	0	17.7491	10.782	0	0	5.92075	3.31817	0	1	47.6509	75.78	0	0	5.44885	2.50413	0	0	9.55379	8.86518	0	0	0.812526	0.808078	0	0	2.80222	2.06546	0	0	1.71326	2.46044	0	0	1.39821	1.26756	0	0
19/12/2016	6.33295	1.47836	0	0	13.738	8.25458	0	0	6.22815	3.50567	0	1	45.7592	66.4892	0	0	5.40835	2.59842	0	0	9.69068	9.58772	0	0	0.816195	0.795731	0	0	2.62113	3.01668	0	0	1.52184	2.30411	0	0	1.29264	1.27572	0	0
20/12/2016	2.17516	1.37872	0	1	16.4398	7.92467	0	0	6.5796	2.74992	0	1	44.6087	55.4125	0	0	5.28926	2.50879	0	0	9.88784	9.29969	1	0	0.791448	0.790869	0	0	2.50426	2.88841	0	0	1.58692	1.55232	0	0	1.29246	1.20532	0	0
21/12/2016	2.3808	1.33829	0	1	12.7075	5.80807	0	0	5.89232	3.34921	0	1	49.2054	57.4769	0	0	4.75299	2.50638	0	0	11.6983	9.5359	0	0	0.771582	0.793492	0	0	1.97695	3.44061	0	0	1.56868	1.57891	0	0	1.27076	1.17607	0	0
22/12/2016	2.6677	1.27564	0	1	11.1016	6.03336	0	0	2.54894	2.62907	0	1	47.7365	56.4508	0	1	4.49837	3.11205	0	0	10.6128	7.72593	0	0	0.781818	0.695636	0	0	2.32287	3.52856	0	0	1.50519	1.35603	0	0	1.22824	1.27773	0	0
23/12/2016	5.01611	1.49133	0	1	12.8993	4.91826	0	1	2.40287	2.90724	0	1	51.3925	57.3745	0	1	4.23889	3.71427	0	0	10.8681	12.1544	0	0	0.78486	0.669358	0	0	2.07481	3.7959	0	0	1.61182	1.29761	0	0	1.26851	1.22629	0	0
24/12/2016	2.67956	1.20662	0	1	12.2061	4.86816	0	0	2.18489	2.64637	0	2	44.1139	44.5468	0	1	4.44572	3.27675	0	0	11.4575	8.71179	0	0	0.71164	0.682341	0	0	2.15931	3.75024	0	0	1.60939	1.37591	0	1	1.25115	1.19666	0	0
25/12/2016	2.51392	4.29303	0	1	13.0565	6.71872	1	0	1.97189	2.20296	0	1	42.4488	70.5013	0	1	4.53793	3.36039	0	0	9.65131	11.0225	0	0	0.653634	0.693455	0	0	3.93564	3.25513	0	0	1.63326	1.52241	0	0	1.32023	1.15719	0	0
26/12/2016	2.48311	0.847057	0	0	11.1386	7.01544	1	0	1.98535	2.39481	0	0	40.7004	46.4619	0	0	4.72703	3.24322	0	0	12.8803	10.1431	0	0	0.704265	0.68808	0	0	2.70518	3.19805	0	0	1.72963	1.55405	0	0	1.3528	1.16806	0	0
27/12/2016	2.87703	1.12062	0	1	11.692	6.95846	0	0	2.21118	2.49953	0	0	40.1271	35.0288	0	1	5.54224	3.14125	0	0	13.1061	9.19134	0	0	0.702031	0.75361	0	0	2.37332	3.06641	0	0	1.7255	1.47528	0	0	1.095	1.17052	0	0
28/12/2016	2.39281	1.06591	0	1	11.1827	6.25494	1	0	2.2247	2.31087	0	0	42.3772	28.5432	0	0	5.30919	3.73308	0	0	16.624	8.28975	0	0	0.696498	0.741338	0	0	2.88605	3.64615	0	0	1.54091	1.63487	1	0	1.06707	1.12199	0	0
29/12/2016	2.31673	1.12154	0	1	10.6774	6.26004	0	0	1.64746	2.59474	0	0	39.1909	30.4415	0	0	4.34804	3.58015	0	0	14.333	10.9799	0	0	0.687829	0.755653	0	0	3.09209	3.57723	0	0	1.69966	1.41113	0	0	1.07364	1.14456	0	0
30/12/2016	3.09215	1.51045	0	1	9.76025	7.93477	2	0	2.15808	2.60348	0	0	31.7801	31.5316	1	0	4.73385	4.07297	0	0	17.8068	9.58098	0	0	0.73985	0.765089	0	0	3.32446	3.53908	0	0	2.5691	1.40891	1	0	1.14261	1.11226	0	0
31/12/2016	3.0252	1.51394	0	0	7.23822	7.83534	1	0	3.30401	2.97575	0	0	28.3934	48.4943	2	0	4.66195	4.81364	0	0	10.9833	14.7197	0	0	0.734774	0.778378	0	0	2.60629	3.49468	0	0	1.64671	1.87307	0	0	1.11543	1.13547	0	0
1/1/2017	2.85643	1.47423	0	0	7.89165	8.35674	0	0	2.41585	3.28318	0	0	29.1466	37.6085	1	1	4.66169	4.72577	0	0	11.7012	11.5195	0	0	0.715641	0.789869	0	0	2.66807	2.71776	0	0	2.0436	1.81297	0	0	1.11615	1.13273	0	0
2/1/2017	2.65122	1.5099	0	0	7.20588	9.58243	0	0	3.10955	3.5893	1	0	28.8389	27.7008	1	1	4.47328	4.87898	0	0	12.544	10.742	0	0	0.70551	0.785269	0	0	2.66085	2.59709	0	0	1.82302	1.90519	0	0	1.23093	1.14062	0	0
3/1/2017	2.49215	1.61103	0	0	7.38017	8.81794	0	0	3.26534	3.29234	0	0	29.5248	33.6478	1	1	4.91025	5.02145	0	0	11.8516	13.4736	0	0	0.702292	0.785816	0	0	2.79056	2.8716	0	0	2.33903	1.69295	0	0	1.18546	1.11644	0	0
4/1/2017	2.19229	1.39649	0	0	7.30336	8.3003	0	0	3.18567	2.70826	0	1	30.4553	24.6279	1	1	5.40689	4.82337	0	0	11.1718	12.9191	0	0	0.694661	0.841558	0	0	1.79373	3.13456	1	0	1.9905	1.72202	0	0	1.1769	1.10953	0	0
5/1/2017	2.08992	1.78005	0	0	6.89911	9.70336	0	0	3.16846	2.70113	0	0	29.0113	33.3492	1	0	4.96913	4.96715	0	0	11.4904	12.1585	0	0	0.672699	0.841289	0	0	1.85592	2.61691	1	1	1.88314	1.75242	1	0	1.03464	1.14665	0	0
6/1/2017	1.36939	3.07695	0	0	4.99915	8.906	0	0	2.47584	2.81188	0	0	25.9094	35.1346	1	0	4.45658	5.20681	0	0	7.48307	9.37852	1	0	0.661126	0.835753	0	0	1.79073	2.59541	0	0	1.56017	1.8434	0	0	1.11934	1.05987	0	0
7/1/2017	1.36722	3.43568	0	0	4.27969	12.0611	0	0	1.38855	3.15403	1	0	38.8572	40.9795	1	0	4.66609	5.59232	0	0	7.21832	12.568	1	0	0.666519	0.838677	0	0	1.52596	2.41871	1	1	1.52579	1.79455	0	0	1.11032	1.08333	0	0
8/1/2017	3.14926	1.97058	0	0	4.10019	9.83426	0	0	1.35577	2.71075	2	1	49.5046	27.1016	0	0	4.89246	6.01216	0	0	5.45353	11.5851	0	0	0.666713	0.846889	0	0	1.67171	2.49157	1	1	1.45953	1.42214	1	0	1.08465	1.1045	0	0
9/1/2017	1.47235	1.34507	0	0	5.25001	9.44932	0	0	1.11462	2.12041	2	1	31.1951	19.6247	0	1	5.10056	5.38447	0	0	6.60067	11.7199	0	0	0.671939	0.842754	0	0	1.68193	2.49209	1	0	1.04297	1.33369	1	0	1.05541	1.15511	0	0
10/1/2017	1.67296	2.57854	0	0	4.37776	14.3089	0	0	0.960324	1.94636	2	0	54.6744	23.729	0	0	4.57644	5.17133	0	0	2.82655	10.7174	2	0	0.703347	0.831793	0	0	1.49221	2.55194	1	0	0.584254	1.3902	1	0	1.03752	1.2773	0	0
11/1/2017	0.932587	2.93597	1	0	4.22056	14.9844	0	0	1.49089	2.58412	1	0	25.9568	34.5806	0	1	4.2196	5.52844	0	0	3.17026	7.45726	1	0	0.744661	0.832011	0	0	1.58889	3.23739	1	0	0.681238	1.32148	0	0	1.03115	1.19572	0	0
12/1/2017	1.60798	5.3732	0	0	4.11178	13.7625	0	0	1.02021	3.08158	1	0	23.5103	47.0985	0	1	4.57069	5.0206	0	0	3.01046	8.57617	0	0	0.736182	0.842448	0	0	1.46336	3.96837	1	0	0.752272	1.46768	0	0	1.03709	1.15758	0	0
13/1/2017	1.4455	1.72527	0	0	6.75361	14.996	0	0	1.35255	3.03709	2	0	30.9815	19.8111	0	0	4.38536	4.89173	0	0	2.70326	6.9232	0	0	0.688185	0.849704	0	0	1.19417	3.71206	1	0	0.885195	1.3499	0	0	1.58823	1.20351	0	0
14/1/2017	1.13742	1.96113	1	0	8.92975	10.2629	0	0	0.943156	2.75787	2	0	23.3284	22.6574	0	1	4.27764	5.69862	0	0	3.75716	19.3163	0	0	0.689498	0.849885	0	0	1.86604	3.71388	0	0	1.36925	1.2639	0	0	1.57707	1.15595	0	0
15/1/2017	1.74188	2.04291	0	0	7.27195	11.7604	0	0	1.00797	3.52285	0	0	23.9881	20.0301	0	2	3.91463	5.75691	0	0	3.17667	11.9967	0	1	0.694944	0.842227	0	0	2.07218	2.30521	0	0	0.915461	1.34419	0	0	1.60432	1.51557	0	0
16/1/2017	1.86343	2.00811	0	0	7.1286	13.1951	0	0	1.22988	3.83995	1	1	21.8113	23.1437	0	2	4.51287	5.21102	0	0	3.25579	12.8676	0	0	0.737767	0.852099	0	0	2.16589	2.84545	0	0	0.924799	1.43411	0	0	1.50435	1.49892	0	0
17/1/2017	0.956565	3.8488	1	0	6.23152	11.2855	0	0	1.18654	4.88649	2	0	20.2703	22.2015	0	2	4.37083	5.96438	0	0	3.20614	11.8433	0	1	0.743429	0.847088	0	0	2.22948	2.66105	0	0	0.92814	1.32242	0	0	1.5217	1.55202	0	0
18/1/2017	0.966802	3.02782	0	1	4.83798	8.40312	0	0	0.990512	4.58764	2	0	27.9877	21.4067	0	1	4.26518	5.94134	0	0	3.05347	10.5924	1	1	0.698762	0.85382	0	0	2.18606	2.05857	0	0	1.00077	1.59587	0	0	1.66265	1.32724	0	0
19/1/2017	1.19102	2.41501	0	1	4.16297	12.4027	0	0	2.3836	5.54007	1	0	30.724	21.3348	1	2	4.24558	6.1008	0	0	3.55814	10.4853	0	1	0.711902	0.863516	0	0	1.99854	1.96759	0	0	0.899156	1.87634	0	0	1.20097	1.2243	0	0
20/1/2017	1.05403	1.08704	0	2	5.24531	11.3872	1	0	2.30153	7.00649	1	0	29.309	18.6033	0	2	3.92302	6.0253	0	0	3.91865	12.4758	1	1	0.762653	0.885226	0	0	2.15637	1.59257	0	0	1.01567	1.94129	0	0	1.04386	1.755	0	0
21/1/2017	1.34265	1.40874	0	1	4.80607	8.35412	1	0	2.18167	5.44541	0	0	27.6739	15.0934	0	3	4.58833	6.38859	0	0	4.55909	9.28483	1	0	0.757939	0.881799	0	0	2.29341	2.22305	0	0	0.976098	2.28261	1	0	1.40766	1.64896	0	0
22/1/2017	1.21285	1.32021	0	1	5.70148	5.57769	0	0	2.2028	5.71997	0	0	25.6771	14.601	0	3	4.26354	6.08456	0	0	5.52372	11.6876	0	1	0.758315	0.880935	0	0	1.7889	2.27702	0	0	1.16839	2.26215	0	0	0.945811	1.24471	0	0
23/1/2017	1.29031	1.16596	0	1	5.65576	5.13728	0	0	2.41388	4.24788	1	0	29.2359	21.311	1	2	4.34883	6.18953	0	0	6.22009	8.25228	0	1	0.775224	0.879108	0	0	1.73431	2.17704	0	0	1.1155	2.47272	0	0	1.00534	1.36364	0	0
24/1/2017	1.39367	1.41434	0	1	5.54099	4.99098	0	0	2.84134	4.07331	1	0	31.8618	23.6738	2	0	4.04012	6.06698	0	0	6.81979	6.2275	0	1	0.787828	0.867068	0	0	1.7727	2.12937	0	0	1.1478	1.89935	0	0	1.02351	1.48833	0	0
25/1/2017	1.9487	1.82101	0	1	6.44412	7.23584	0	0	3.27582	3.98616	0	0	41.9677	24.2269	2	0	4.35217	6.28918	0	0	8.20101	5.12032	0	2	0.809999	0.874058	0	0	1.9657	2.1701	0	0	1.26142	1.44122	0	0	1.11995	1.19279	0	0
26/1/2017	1.35806	1.67437	0	0	8.15733	6.85621	0	0	3.92686	3.87165	0	0	24.3936	23.7449	1	1	3.03355	6.52032	1	0	5.74829	3.98675	0	1	0.820869	0.881664	0	0	1.98137	1.86935	0	0	1.49255	1.4072	0	0	1.06266	1.23747	0	0
27/1/2017	1.86111	1.78971	0	0	7.29881	9.25738	0	0	3.29015	4.0711	0	0	27.38	22.7991	1	1	4.25229	5.86013	0	0	5.94857	4.39967	0	0	0.824176	0.894862	0	0	1.82822	2.06406	0	0	1.67554	1.66311	0	0	1.01902	1.23462	0	0
28/1/2017	1.1513	2.13236	0	0	6.73404	8.58103	0	0	3.62123	3.98761	0	0	11.6086	15.0704	2	1	3.96392	5.33848	0	0	7.3367	4.86075	0	1	0.833501	0.894644	0	0	1.76705	2.01332	0	0	1.42817	1.62208	0	0	1.01307	1.24774	0	0
29/1/2017	1.23286	2.55937	0	0	7.11892	8.49088	0	0	3.56999	4.63076	0	0	14.25	15.2296	1	1	4.11018	5.00363	0	0	6.49538	6.37122	1	0	0.850177	0.881683	0	0	1.29364	2.03508	0	0	1.10051	1.56142	0	0	1.01712	1.21239	0	0
30/1/2017	1.27545	2.65883	0	0	7.25752	6.84383	0	0	3.20838	4.3041	0	0	11.9507	11.6822	1	1	4.15429	4.98053	0	0	5.80957	5.1618	1	0	0.848413	0.883567	0	0	1.68909	2.10344	0	0	1.25585	1.28553	0	0	1.01415	1.25336	0	0
31/1/2017	1.26534	2.69968	0	0	6.15719	7.4542	0	0	3.22366	4.46035	0	1	10.8106	10.8801	2	1	4.57317	4.89313	0	0	5.87136	5.29879	0	0	0.865702	0.885889	0	0	1.41498	2.00273	0	0	1.28999	1.04781	1	0	1.04532	1.29956	0	0
1/2/2017	2.2116	2.27118	0	0	7.60502	6.95911	0	0	3.14096	4.80821	0	0	13.7851	17.3043	2	0	4.32483	5.07916	0	0	11.2349	6.4464	1	0	0.861238	0.880322	0	0	1.79352	1.79028	0	0	1.15055	1.14408	0	1	1.06538	1.29691	0	0
2/2/2017	1.16663	2.58087	0	0	7.26502	6.97995	0	0	3.12889	3.7942	0	0	10.1896	10.4394	1	1	4.55304	5.63434	0	0	6.17987	5.83875	1	0	0.869222	0.874531	0	0	2.03259	1.6801	0	0	1.07535	1.13389	0	0	1.04369	1.3246	0	0
3/2/2017	1.20963	2.68511	0	0	7.72524	6.00489	0	0	3.21579	4.03758	0	0	18.6658	19.4955	1	1	4.52806	5.32595	0	0	6.30149	6.38136	1	0	0.878446	0.868722	0	0	2.03506	1.40344	0	0	0.820994	1.153	0	1	1.05185	1.33545	0	0
4/2/2017	1.16053	1.779	0	0	6.29217	6.06803	0	0	3.66636	4.36782	0	0	19.9655	8.90604	0	1	4.38047	6.04149	0	0	10.987	6.22764	1	1	0.867301	0.853175	0	0	1.80097	1.42598	0	0	0.77288	1.10874	0	1	1.04873	1.28598	0	0
5/2/2017	1.2304	3.53874	0	0	7.00447	6.2024	1	0	3.83975	4.28639	0	0	20.4461	24.6457	0	2	4.29105	5.47791	0	0	7.71567	7.48549	1	0	0.866427	0.860384	0	0	1.87647	1.18788	0	0	0.916153	1.22423	0	0	0.98984	1.05938	0	0
6/2/2017	1.94511	1.8768	1	0	5.22829	5.48238	0	0	4.02656	3.8409	1	0	41.2759	17.467	1	0	4.69717	5.02414	0	0	15.0807	6.57415	0	1	0.865057	0.858496	0	0	1.54224	1.51774	0	0	1.05921	1.01659	0	0	1.03412	1.04559	0	0
7/2/2017	3.12586	2.25596	0	0	7.78748	6.6969	0	0	4.43294	3.87766	1	0	35.136	17.6451	2	1	4.67758	5.21256	0	0	12.9422	6.10857	0	0	0.86575	0.850881	0	0	1.58115	1.5811	0	0	0.92948	0.857545	0	0	1.1102	1.29758	0	0
8/2/2017	1.52586	2.10656	0	0	8.42617	6.72579	0	0	4.90795	3.56641	0	0	26.6881	20.5072	1	1	5.13881	5.00766	0	0	14.8495	11.4624	0	0	0.899459	0.864912	0	0	1.5094	1.80654	0	0	1.02564	0.785775	0	0	1.02316	1.32057	0	0
9/2/2017	2.54752	1.60703	0	0	8.56715	8.10486	0	0	5.36664	3.95273	0	0	30.986	22.1077	0	1	4.90699	4.93966	0	0	14.6255	7.9516	0	1	0.929387	0.873885	0	0	1.50224	1.61054	0	0	0.921069	0.663819	0	0	0.934809	1.38857	0	0
10/2/2017	1.65358	1.97272	0	0	9.00241	5.31924	0	1	5.80614	4.14354	0	0	27.508	25.9053	0	0	4.63113	4.65607	0	0	17.7389	6.77658	0	0	0.95823	0.883595	0	0	1.4718	1.99357	0	0	0.947046	1.54551	0	0	0.916039	1.37079	0	0
11/2/2017	1.86232	1.21099	0	1	7.76454	5.91591	0	1	5.50284	3.25675	0	0	25.0594	17.0637	1	2	4.45909	4.63511	0	0	13.5919	5.28019	0	0	0.997102	0.890766	0	0	1.64644	1.64207	0	0	1.39259	1.65483	0	0	0.88796	1.25907	0	0
12/2/2017	1.61679	1.62685	0	2	7.17077	6.0459	0	1	5.05592	3.76297	0	0	21.1283	16.2353	1	0	4.35395	4.4109	0	0	14.3884	4.90651	0	0	1.01294	0.890536	0	0	1.6466	1.96721	0	0	0.923622	0.848015	0	0	0.894689	1.20397	0	0
13/2/2017	1.82164	1.34239	0	1	6.48005	6.5023	0	1	4.74765	3.57371	0	0	18.8185	15.1278	1	0	4.46978	4.33335	0	0	13.7942	4.05935	0	0	1.01616	0.881341	0	0	2.20351	1.94777	0	0	1.1799	0.809678	0	0	0.963117	1.1928	0	0
14/2/2017	2.56288	1.8038	0	1	7.51069	7.2073	0	0	4.99421	3.53688	0	0	31.5565	15.9672	0	4	4.30569	4.07792	0	0	16.2131	6.68755	0	0	1.03408	0.891077	0	0	2.09488	2.09808	0	1	1.26034	1.04735	0	0	0.996644	1.17896	0	0
15/2/2017	2.82929	1.11594	0	1	7.83744	6.56027	0	0	5.31455	3.04608	0	0	26.8616	15.472	1	4	4.92192	4.72918	0	0	15.8204	7.69115	0	1	1.01758	0.899592	0	0	2.09876	1.56842	0	0	1.0893	1.04761	0	0	0.991627	1.16446	0	0
16/2/2017	1.71195	1.20904	0	1	7.7367	6.14026	0	0	4.89301	3.00213	0	0	22.4443	14.7581	1	3	4.64036	4.5077	0	0	16.6256	7.549	0	0	1.00664	0.920274	0	0	2.09089	1.53963	0	0	1.1501	0.93583	0	0	1.36511	1.14918	0	0
17/2/2017	4.48022	1.51719	0	1	7.85655	5.9011	0	0	5.00354	2.95193	0	0	25.9644	20.1892	0	5	4.74859	4.23283	0	0	16.8527	5.5531	0	0	1.02029	0.936754	0	0	2.29198	1.71781	0	1	1.52682	0.945497	0	0	1.39263	1.14077	0	0
18/2/2017	1.91875	1.04276	1	1	6.98178	6.6619	0	0	6.19755	3.03404	0	0	24.7968	14.9857	0	4	4.37118	4.58695	0	0	16.0056	3.93842	0	0	1.02059	0.949252	0	0	2.71029	1.6616	0	1	1.47879	0.93523	1	0	1.42847	1.14942	0	0
19/2/2017	2.31678	3.67868	0	1	6.79881	6.0172	0	0	6.33882	3.3917	1	0	25.3041	19.5255	0	1	4.4237	4.57454	0	0	16.4552	10.1059	0	0	1.03448	0.951462	0	0	2.47523	2.00888	0	0	1.46654	1.12074	0	0	1.01064	1.17297	0	0
20/2/2017	1.85079	1.75218	0	1	8.10584	5.69398	0	0	6.70419	3.5929	1	0	20.2186	14.5035	1	3	4.78615	4.60601	0	0	15.0049	7.22444	0	1	1.03871	0.966395	0	0	2.55057	1.93721	0	0	1.8075	0.857335	0	1	0.984487	1.1592	0	0
21/2/2017	1.95707	1.9915	0	0	7.02558	6.54048	0	0	6.1264	3.57222	0	0	20.4187	16.124	1	2	5.22902	5.25281	0	0	15.151	8.14895	0	1	1.03933	0.997891	0	0	2.67189	2.01187	0	0	1.85946	0.827813	0	0	1.00891	1.174	0	0
22/2/2017	1.75591	1.96817	0	0	8.03459	6.16983	0	0	6.0948	3.61341	0	0	28.8821	12.4365	1	2	4.65399	5.1405	0	0	8.82573	10.6184	1	1	1.03485	1.00837	0	0	2.01383	1.65453	0	0	1.45017	0.882546	0	0	1.11148	1.11451	0	0
23/2/2017	1.82538	2.00618	0	1	7.71953	6.27202	0	0	4.99671	3.21294	0	0	23.119	13.3078	1	1	4.98014	5.05977	0	0	6.89917	12.9348	1	0	1.05908	1.00637	0	0	1.85099	1.83704	0	0	1.06852	0.913336	0	0	0.989755	1.12976	0	0
24/2/2017	1.61021	1.46833	0	0	7.59378	5.32153	0	0	4.41449	3.77832	1	0	6.72435	12.5581	2	2	6.4359	4.70724	0	0	6.6139	15.2541	0	0	1.05487	1.01367	0	0	1.59439	2.13002	0	0	1.27345	0.90568	0	0	1.01501	1.1833	0	0
25/2/2017	1.41697	1.53044	0	0	6.62626	4.62939	0	0	4.41351	3.51135	0	0	3.18269	12.6203	1	1	6.22468	5.11242	0	0	7.15039	15.822	0	0	1.05454	1.02269	0	0	1.55398	2.10567	0	0	1.4244	0.909075	0	0	1.00911	1.20114	0	0
26/2/2017	1.23806	1.53732	0	0	6.77056	4.77274	0	0	5.39762	2.86754	0	0	3.29985	12.5275	2	1	6.06198	4.78284	0	0	12.3881	13.5799	0	1	1.06791	1.03715	0	0	1.64547	2.21997	0	0	1.45109	0.853003	0	0	1.00655	1.2011	0	0
27/2/2017	1.30239	1.39514	0	0	7.8543	4.86489	0	0	5.11883	3.33054	0	0	3.39949	11.1511	1	1	5.9216	4.86152	0	0	9.3773	17.0246	0	0	1.05388	1.04551	0	0	1.30741	2.51229	0	0	1.67684	0.950344	0	0	0.947715	1.20356	0	0
28/2/2017	1.26136	1.77624	0	0	9.15265	6.45254	0	1	5.05335	3.34144	0	0	10.823	12.5452	0	1	6.73377	4.35247	0	0	10.2627	16.7033	0	0	1.06862	1.04359	0	0	1.40911	2.54772	0	0	1.70059	1.15341	0	0	0.999027	1.20089	0	0
1/3/2017	1.5269	1.4132	0	0	7.83295	2.89722	1	0	3.66217	3.4433	0	0	7.39511	18.3453	2	0	5.69269	4.76818	0	0	6.88948	8.63169	0	1	1.07636	1.03297	0	0	1.46524	1.93865	0	0	1.464	1.40866	0	0	0.878802	1.12659	0	0
2/3/2017	1.52569	1.29029	0	0	7.02264	4.53272	0	0	3.08902	3.19429	0	0	8.88553	19.2034	1	0	6.2297	4.83486	0	0	4.92701	6.54801	0	0	1.05549	1.03084	0	0	1.6324	2.06234	0	0	1.2924	1.17996	0	0	0.912878	1.13138	0	0
3/3/2017	1.40449	1.64497	0	0	6.44881	4.94369	0	1	3.5681	3.52262	0	0	11.1997	19.6918	0	0	5.66993	4.69064	0	0	8.0303	6.52984	0	0	1.07332	1.03236	0	0	2.08037	1.80882	0	0	0.978318	1.13933	0	0	0.941198	1.18738	0	0
4/3/2017	1.3043	1.32799	0	0	6.27585	6.15075	0	1	3.47076	3.57267	0	0	9.65477	19.2951	0	0	5.76355	4.59686	0	0	7.36312	9.0949	0	0	1.10168	1.038	0	0	2.03261	1.88857	0	0	0.997874	1.19851	0	0	1.04295	1.21063	0	0
5/3/2017	1.15758	1.33686	0	0	5.05767	5.43141	0	1	3.40566	3.25039	0	0	11.2316	13.602	0	0	5.81856	4.44082	0	0	7.69346	8.52266	0	0	1.09468	1.0656	0	0	1.92297	2.28485	0	0	1.11366	1.09492	0	0	1.08954	1.20075	0	0
6/3/2017	0.948392	1.23714	0	0	5.61819	4.70985	0	0	3.35822	3.45107	0	0	7.08372	8.32919	0	0	5.46013	4.44702	0	0	8.24583	8.52027	0	0	1.10303	1.07272	0	0	1.84361	2.22195	0	0	0.990543	0.944564	0	0	0.99026	1.21105	0	0
7/3/2017	0.781053	2.00487	0	0	5.67824	4.80465	0	0	3.43257	4.0656	0	0	7.10252	20.3693	1	1	5.3859	4.39159	0	0	7.77495	9.65698	0	0	1.08285	1.0732	0	0	1.8161	1.93383	0	0	0.945541	1.38741	0	0	1.08648	1.22333	0	0
8/3/2017	0.733144	2.57517	0	0	5.9493	4.19567	0	0	3.22058	3.37219	0	0	9.34407	20.3591	0	1	4.98593	4.79676	0	0	10.1114	10.3461	0	1	1.06821	1.08811	0	0	1.94339	2.23004	0	0	0.923735	1.15949	0	0	1.01808	1.28234	0	0
9/3/2017	0.746461	1.53574	0	1	6.08573	4.48774	0	0	3.06874	3.85823	0	0	10.5857	16.6068	0	0	4.96784	5.29548	0	0	9.03094	10.4901	0	0	1.06777	1.07699	0	0	1.85656	1.97461	0	0	0.859426	1.03111	0	0	0.971233	1.19494	0	0
10/3/2017	1.02492	2.54391	0	1	5.57006	4.3296	0	1	3.55499	4.01631	0	0	9.65014	20.3327	0	0	4.91208	5.18631	0	0	10.9411	9.81509	0	0	1.07674	1.07121	0	0	2.73503	1.87367	0	0	0.965043	1.11806	0	0	1.04701	1.10491	0	0
11/3/2017	1.25734	1.74487	0	0	5.49223	4.06765	0	0	4.11649	4.60456	0	0	20.0489	14.2117	0	0	4.81314	4.85527	0	0	5.51627	14.0678	0	0	1.0664	1.07183	0	0	2.97852	1.76553	0	0	0.921845	1.12947	0	0	1.31937	1.09264	0	0
12/3/2017	1.24453	1.99519	0	0	5.76438	3.38797	0	0	3.67358	4.42906	0	0	18.0419	15.8675	0	1	5.6225	5.04508	0	0	5.49747	14.9597	0	0	1.07273	1.07193	0	0	3.07872	2.01111	0	0	0.830998	1.05749	0	0	1.26105	1.10864	0	0
13/3/2017	1.52119	2.20839	0	1	5.55214	4.35792	0	0	4.52831	4.25323	0	0	20.0823	12.8901	0	1	4.97595	5.2751	0	0	5.3656	15.4485	0	0	1.07038	1.02241	0	0	2.43506	2.58592	0	0	0.944601	1.23153	0	0	1.26127	1.2342	0	0
14/3/2017	1.39456	2.30294	0	2	5.5319	5.24957	0	0	4.65765	4.26285	0	0	15.9676	13.7793	0	2	5.33393	5.82806	0	0	5.79758	15.6702	0	0	1.0637	1.01797	0	0	2.38441	3.13781	0	0	0.929518	1.06914	0	0	1.22218	1.25155	0	0
15/3/2017	1.29037	2.65704	0	1	5.5369	5.72605	1	0	4.01489	4.46594	0	0	8.17998	16.3816	0	1	6.0108	5.4725	0	0	7.39654	15.2484	0	0	1.06408	1.02782	0	0	1.4734	1.59932	0	0	1.54429	0.751467	0	0	1.25755	1.30006	0	0
16/3/2017	1.21029	2.91303	0	1	5.25371	4.89678	1	0	4.6978	4.24273	0	1	7.70775	13.3319	0	3	5.03747	5.60642	0	0	7.92854	15.4148	0	0	1.06348	1.01543	0	0	1.53949	1.77932	0	0	1.36329	0.817674	0	0	1.25825	1.29923	0	0
17/3/2017	0.968178	2.85299	0	1	5.56482	5.39708	0	0	4.56958	4.05852	0	1	6.35269	14.1648	1	1	4.81461	5.97031	0	0	4.74152	7.50778	0	0	1.07896	1.00555	0	0	1.71989	1.57206	0	0	1.34753	1.03849	0	0	1.34531	1.31998	0	0
18/3/2017	0.81685	2.36927	0	0	5.54935	5.07921	0	0	4.83919	4.32928	0	0	6.27597	11.3598	0	2	4.90747	5.27136	0	0	5.25811	7.6184	0	0	1.09172	1.01026	0	0	1.97606	1.30159	0	0	0.811844	1.1806	0	0	1.35149	1.41254	0	0
19/3/2017	1.18121	2.12892	0	0	4.2061	8.02207	0	0	3.00567	3.75339	0	0	7.75331	11.1877	0	2	5.17913	4.5813	0	0	5.26631	5.02961	0	0	1.07113	0.962632	0	0	1.86588	1.19246	0	1	0.771328	1.31161	0	0	1.40092	1.46449	0	0
20/3/2017	0.866151	2.06664	0	0	4.85857	8.02034	0	0	2.57738	3.28347	0	1	10.9141	10.658	0	2	5.84201	5.0738	0	0	4.88371	4.8033	1	0	1.06638	0.956507	0	0	1.85001	1.39542	0	1	0.846953	1.19602	0	0	1.32599	1.46749	0	0
21/3/2017	1.0595	1.6033	0	1	6.14204	7.16968	0	0	2.7735	2.46227	0	1	7.59127	14.2283	0	1	6.61098	5.04628	0	0	4.69781	4.21306	1	0	1.05781	0.955348	0	0	1.61512	2.84159	1	0	1.01172	1.44197	0	0	1.3548	1.33905	0	0
22/3/2017	0.933795	2.0583	0	0	6.34619	7.07039	0	0	2.76855	2.34423	0	1	8.08338	16.3957	0	1	6.4929	5.12277	0	0	4.29622	5.71875	1	0	1.05357	0.93485	0	0	1.76876	2.2734	1	0	1.00764	1.50901	0	0	1.0634	1.31517	0	0
23/3/2017	0.894095	1.96964	0	1	6.09005	6.55899	0	0	2.47195	2.17253	0	0	9.03306	18.157	1	1	6.5797	5.65005	0	0	4.73431	9.62552	1	0	1.04916	0.920268	0	0	1.64448	1.78781	1	0	1.03571	1.48778	0	0	1.09725	1.28243	0	0
24/3/2017	0.913284	1.48819	0	1	6.34162	6.3404	0	0	2.3641	2.9216	0	0	9.67021	18.8086	0	1	6.64879	6.02018	0	0	4.23269	4.08808	0	0	1.05295	0.93865	0	0	1.57669	2.37299	1	0	1.06866	1.41453	0	0	1.10586	1.343	0	0
25/3/2017	1.13166	2.33867	0	0	6.52393	6.41014	0	0	2.39966	2.91911	0	0	10.5268	31.611	0	0	7.05539	5.98784	0	0	4.70771	4.05314	0	0	1.03997	0.956284	0	0	1.73888	2.1544	0	0	0.808344	1.34775	0	0	1.0724	1.31424	0	0
26/3/2017	1.16683	2.04423	0	0	6.16278	5.95143	0	0	3.97304	3.65811	0	0	11.7811	29.136	0	0	6.87987	5.93592	0	0	3.32267	4.39019	0	0	1.03623	0.946662	0	0	1.81397	2.13995	0	0	0.753987	1.3392	0	0	1.07622	1.15936	0	0
27/3/2017	1.09694	2.00226	0	0	6.07617	6.33925	0	1	3.7558	3.34504	0	0	10.842	29.0485	1	0	5.82918	5.97273	0	0	3.46801	5.22502	0	0	1.01813	0.939135	0	0	2.02034	2.63184	0	0	0.754414	1.34346	0	0	1.10966	1.17683	0	0
28/3/2017	1.03625	2.34459	0	0	6.31912	7.28298	0	0	3.84368	3.29093	0	0	12.4386	26.7998	1	0	5.88843	5.70579	0	0	3.44136	6.04645	0	0	1.01055	0.933265	0	0	1.7667	2.58107	0	0	0.87091	1.336	0	0	1.09948	1.16034	0	0
29/3/2017	1.16815	1.89676	0	1	5.99143	4.90789	0	0	3.99071	3.41858	0	0	15.0473	27.0226	1	0	5.94335	5.04668	0	0	3.17129	7.75518	0	0	1.03613	0.949022	0	0	1.87844	1.74391	0	0	0.814723	1.28158	0	0	1.1072	1.24557	0	0
30/3/2017	1.06744	1.25538	0	1	4.4921	5.17576	0	0	4.20058	2.548	0	0	15.5348	27.4857	1	0	6.04156	5.08144	0	0	3.46785	6.66901	0	0	1.03251	0.982183	0	0	1.83174	2.3424	0	0	0.996465	1.32628	0	0	1.03513	1.1906	0	0
31/3/2017	1.18575	1.43208	0	1	4.51484	5.63086	0	0	4.11832	2.64134	0	0	16.7725	31.3855	0	0	4.80572	4.92458	0	0	4.86856	5.78664	0	0	0.994188	0.99527	0	0	1.93204	2.11269	0	0	1.20687	1.44904	0	0	1.01487	1.14494	0	0
1/4/2017	1.30374	1.24016	0	1	4.51762	5.71226	0	0	4.27314	2.85603	0	0	19.649	31.5833	0	1	4.30722	5.24201	0	0	3.98897	4.0305	0	0	0.975092	1.00523	0	0	1.90223	1.43833	0	0	1.18794	1.38805	0	0	0.917507	1.15521	0	0
2/4/2017	1.34652	1.14703	0	0	4.45702	5.80736	0	0	4.12788	2.77792	0	0	16.3572	32.821	2	0	4.59651	4.51171	0	0	2.79546	6.11856	1	0	0.96984	0.9696	0	0	1.79247	1.60039	0	0	0.905694	1.08937	0	0	0.976772	1.17459	0	0
3/4/2017	1.7975	1.48289	0	0	4.5434	6.16977	0	0	4.51239	2.62978	0	0	32.2797	36.9815	0	0	4.71222	4.65419	0	0	2.62742	4.39664	1	0	0.954569	0.900673	0	0	1.7666	1.32624	0	0	1.0201	1.29688	0	0	0.964893	1.17596	0	0
4/4/2017	1.56618	1.78098	0	0	5.52192	6.05133	1	0	4.74446	2.87939	0	0	27.9678	39.1603	0	0	4.86158	4.74895	0	0	2.68991	3.93988	1	1	0.969479	0.901288	0	0	1.78051	1.58104	0	0	0.949505	1.36965	0	1	0.952575	1.21657	0	0
5/4/2017	1.27077	1.65999	0	0	5.69305	7.5142	0	0	5.07979	3.05883	0	0	28.5061	41.9443	0	0	4.83738	4.8886	0	0	2.09996	4.10989	1	1	0.953338	0.906046	0	0	1.70418	1.48018	0	0	0.994313	1.46122	0	0	0.941033	1.25551	0	0
6/4/2017	1.04403	1.71222	0	0	5.87616	6.64053	0	0	5.2745	2.94414	0	0	27.6416	31.0616	0	0	5.62079	5.37671	0	0	2.1464	6.37767	1	0	0.935857	0.894927	0	0	1.80299	2.30836	0	0	1.04685	1.16059	0	0	0.948457	1.28305	0	0
7/4/2017	1.07711	1.64408	0	0	6.08252	5.11832	0	0	2.98498	2.34718	0	0	26.9733	28.3334	1	1	5.15461	5.26736	0	0	1.53853	4.92564	1	0	0.8933	0.85262	0	0	1.69915	1.44325	0	0	1.1607	1.15804	0	0	0.906465	1.42731	0	0
8/4/2017	1.00328	1.97484	1	0	6.32846	3.36113	0	0	2.52775	2.56454	0	0	26.8096	27.7122	0	1	5.6854	5.61368	0	0	3.58725	5.67712	1	0	0.897746	0.985458	0	0	2.66575	1.72933	0	0	1.46626	1.51009	0	0	0.905568	1.32867	0	0
9/4/2017	1.40698	1.72135	1	0	6.29383	3.49708	0	0	2.79272	2.68652	0	0	28.9979	30.0375	0	1	5.94034	5.46093	0	0	3.34688	6.38639	2	0	0.871792	1.03226	0	0	2.84229	1.87532	0	0	1.29951	1.44902	0	0	0.930047	1.36289	0	0
10/4/2017	1.04251	1.58848	0	0	5.77526	3.69439	0	0	2.43921	2.40696	0	0	30.2315	31.0453	0	1	5.72939	5.51736	0	0	3.94469	5.58274	1	0	0.865437	1.02491	0	0	2.58133	2.36151	0	0	1.33576	1.18619	0	0	1.00698	1.40766	0	0
11/4/2017	1.35563	1.50229	0	1	5.74736	3.58357	0	1	2.90937	1.86559	0	0	26.6283	30.1416	0	1	5.631	5.50156	0	0	2.16543	4.41763	2	0	0.829429	0.903759	0	0	1.79653	2.43111	0	0	1.1853	1.12444	0	0	0.995387	1.30654	0	0
12/4/2017	1.83037	1.54419	0	0	6.06127	3.39066	0	0	2.51343	1.83491	0	0	26.5756	22.3638	0	1	5.1427	5.90438	0	0	3.04947	2.96757	1	1	0.804	0.922202	0	0	1.80825	2.90956	0	0	0.876715	1.03603	0	0	1.02429	1.18737	0	0
13/4/2017	1.768	1.82876	0	0	5.83834	4.36716	0	0	1.91586	1.93297	0	0	22.7897	24.1518	0	1	5.77168	5.87052	0	0	3.26888	3.25762	1	2	0.842545	0.926926	0	0	1.77052	1.71961	0	0	0.912913	1.02109	0	0	1.2102	1.21575	0	0
14/4/2017	1.6404	1.70918	0	0	5.56904	6.02628	0	0	1.92848	2.23817	0	0	24.5763	27.0443	0	1	6.08741	5.50952	0	0	3.6774	5.98837	0	0	0.836005	0.910767	0	0	1.84675	2.4304	0	0	0.833938	1.16607	0	0	0.872683	1.19688	0	0
15/4/2017	1.74862	1.58056	0	0	5.90202	4.78777	0	0	1.52863	3.39225	0	1	25.0319	27.7445	0	1	5.89213	6.08152	0	0	4.56714	7.08715	0	0	0.895797	0.922196	0	0	1.82007	2.2282	0	0	0.879478	0.996237	0	0	0.904548	1.22862	0	0
16/4/2017	1.90021	1.66758	0	0	6.01986	4.29831	0	0	1.89971	3.41003	0	0	26.8414	28.4755	0	0	5.86361	5.91279	0	0	4.376	7.26327	0	0	0.886113	0.936982	0	0	1.88606	2.05105	0	0	0.985864	1.78178	0	0	0.895331	1.3919	0	0
17/4/2017	1.84984	1.60304	0	0	6.43081	4.72898	0	1	1.47444	3.39029	1	0	25.9475	27.9262	0	0	5.70278	5.49902	0	0	4.51469	5.44431	0	0	0.895369	0.951194	0	0	1.8077	2.18478	0	0	0.878189	0.951476	0	0	1.34713	1.44866	1	0
18/4/2017	1.96207	1.824	0	0	5.70174	4.33607	0	0	1.37833	2.71578	1	0	30.0694	27.4323	0	0	5.40254	5.67231	0	0	4.68266	6.53686	0	0	0.847835	0.962991	0	0	1.85376	2.17634	0	0	0.896147	1.10996	1	0	1.23308	1.31256	1	0
19/4/2017	2.13848	1.73981	0	0	5.68614	5.69887	0	0	2.19357	2.1463	0	1	33.1028	26.423	0	0	5.76325	5.28093	0	0	4.61505	6.88821	0	1	0.859213	0.98174	0	0	1.74222	2.18021	0	0	0.954641	1.27413	0	0	1.17356	1.31847	1	0
20/4/2017	1.89102	1.62708	0	0	5.99556	5.37209	0	0	2.27211	2.29274	0	0	30.8971	27.2635	0	0	6.02004	5.28798	0	0	4.60342	7.50343	0	0	0.79342	1.1414	0	0	1.7116	2.76224	0	0	0.988559	1.13853	0	0	1.18086	1.3066	1	0
21/4/2017	1.71088	1.48866	0	0	5.7675	5.7519	0	0	2.06575	2.95882	1	0	33.0615	24.2132	0	0	5.77343	5.22038	0	0	4.33336	5.67547	0	1	0.773601	1.06726	0	0	1.82522	2.70917	0	0	0.707368	1.08871	0	0	1.03565	1.25864	1	0
22/4/2017	1.71926	1.45383	0	1	5.62389	5.97139	0	0	2.30819	1.70997	0	0	33.0323	24.4878	0	0	5.65211	5.03389	0	0	3.99281	5.93039	0	1	0.781578	1.06654	0	0	1.84747	3.15053	0	0	0.677008	1.12027	0	0	1.01871	1.28638	0	0
23/4/2017	1.69346	1.31376	0	1	5.58238	5.81435	0	0	1.87134	1.14901	0	1	25.7508	23.5489	0	0	5.73474	4.78004	0	0	3.67424	6.32554	0	0	0.792788	1.05986	0	0	1.52684	3.26111	0	0	0.679093	1.51381	0	0	0.983413	1.43115	0	0
24/4/2017	1.57477	1.16401	0	1	4.87434	4.79969	0	0	1.87161	1.47949	0	1	29.5889	24.5286	0	0	5.63383	4.71131	0	0	5.19314	5.88965	0	1	0.649964	1.03508	0	0	1.54298	1.66211	0	0	0.932031	1.36865	0	0	1.05345	1.46626	0	0
25/4/2017	1.66975	1.67599	0	1	5.26152	4.29701	0	2	2.11808	1.27783	0	1	23.2877	26.7015	0	0	5.71553	4.64007	0	0	4.15732	5.89886	0	1	0.66964	1.02942	0	0	1.51262	1.50398	0	0	1.02448	1.28354	0	0	0.94603	1.71378	0	0
26/4/2017	1.49995	1.61525	0	1	8.15229	7.23236	0	0	1.80017	1.54477	0	1	27.7389	25.2158	0	0	5.11728	4.65452	0	0	4.8486	4.99188	0	1	0.701047	1.0362	0	0	1.5966	1.61616	0	1	1.02209	1.01991	0	0	0.882077	1.75409	1	0
27/4/2017	1.38778	2.08151	0	0	8.11283	10.3603	0	0	1.49252	1.92462	0	0	28.8364	27.8512	0	0	5.66565	5.02692	0	0	3.57757	6.51039	0	1	0.692669	1.04684	0	0	1.32129	1.4587	1	1	1.11934	0.976454	0	0	0.895991	1.59951	1	0
28/4/2017	1.41234	2.07971	0	0	8.41368	11.3538	0	0	1.41086	2.23612	0	0	27.6924	28.102	0	0	5.63348	4.807	0	0	3.93898	6.414	0	0	0.621384	1.03936	0	0	1.38063	2.21235	0	1	0.993831	0.938576	1	0	0.841665	1.43728	1	0
29/4/2017	1.4681	1.68768	0	0	6.63848	4.99286	0	0	1.64369	2.10029	0	0	30.7851	26.6744	0	0	6.02726	5.14009	0	0	3.7614	5.58156	0	0	0.625701	1.11605	0	0	1.28027	1.60915	1	1	0.848782	0.838979	1	0	1.07144	1.45098	0	0
30/4/2017	1.74656	1.49332	0	0	4.70832	4.23378	0	0	1.76257	1.93669	0	0	27.9249	25.6794	0	0	5.88105	5.11133	0	0	3.85434	5.65455	0	0	0.784919	1.11053	0	0	1.52794	1.01388	0	1	0.942739	0.889823	1	0	1.13691	1.45797	0	0
1/5/2017	1.76037	1.33848	0	0	5.78502	4.68749	0	1	1.87952	1.55634	0	0	29.5219	26.0301	0	0	5.92386	5.42548	0	0	4.1111	5.79397	0	0	0.879547	1.10965	0	0	1.29165	0.994328	0	1	1.04501	0.962047	0	0	1.11741	1.15423	0	0
2/5/2017	1.48207	1.55576	0	0	5.14268	7.43881	0	0	1.82384	2.14512	0	0	34.7117	37.7196	0	0	4.91499	5.18935	0	0	4.10018	5.41131	0	0	0.867231	1.1	0	0	1.439	1.20931	0	1	0.972685	1.08308	2	0	1.03261	1.1163	0	0
3/5/2017	1.71161	1.65712	0	0	5.42743	7.51948	0	0	1.72416	2.33218	0	0	37.2029	26.7612	0	1	4.92389	5.25163	0	0	4.39304	5.81009	0	0	0.854594	1.1735	0	0	1.4097	1.16897	0	0	0.693487	0.947423	3	0	1.02918	1.25992	0	0
4/5/2017	1.48245	2.01732	0	0	5.17599	8.1676	0	0	1.58741	2.73465	1	0	35.9494	25.0554	0	0	4.85144	4.17873	0	0	3.98046	5.71444	0	0	0.870767	0.968651	0	0	1.3661	1.12339	0	2	0.723731	1.0296	2	0	0.96011	1.24699	0	0
5/5/2017	1.5324	2.07631	0	0	4.77436	8.345	0	0	1.72354	2.5845	0	1	34.8766	31.4103	0	0	4.26147	4.23554	0	0	5.04912	5.61163	0	0	0.951349	0.939947	0	0	1.22579	1.05166	1	2	0.79258	1.05369	3	0	0.993486	1.26714	0	0
6/5/2017	1.62859	2.30446	0	0	4.19673	5.61765	0	0	1.33048	1.91717	1	1	33.915	27.7954	0	0	4.34042	5.20623	0	0	4.82045	5.71817	0	0	0.978543	0.893651	0	0	1.21787	1.31643	0	1	0.712569	1.08134	2	0	1.02425	1.4463	0	0
7/5/2017	1.64599	2.45345	0	0	4.78816	8.05638	0	0	0.944225	2.20936	1	0	28.0625	27.9548	0	0	4.40012	5.08417	0	0	5.14398	6.01403	0	0	0.93432	0.851561	0	0	1.33215	1.50674	0	1	0.911684	1.03191	1	0	1.05216	1.49264	0	0
8/5/2017	1.9217	2.37779	0	0	4.99857	6.11701	0	0	1.21235	1.9053	0	0	29.2358	25.8505	1	0	4.33804	5.17877	0	0	3.76481	11.0508	0	0	0.941356	0.904445	0	0	1.48436	1.46724	0	1	1.06787	1.30565	1	0	1.1545	1.10919	0	0
9/5/2017	1.32911	1.58515	1	0	4.40151	6.61503	0	0	1.51997	2.01267	0	0	24.4125	24.3385	0	0	4.35206	5.76536	0	0	9.98363	7.33176	0	0	0.679687	0.908973	0	0	1.40169	1.6216	1	0	1.32223	1.25084	1	0	1.14481	1.00088	0	0
10/5/2017	1.49707	2.15269	0	0	3.62099	6.50107	0	0	1.69178	1.4541	0	0	29.0833	24.2128	0	0	3.98053	5.43773	0	0	9.32	7.10479	0	0	0.602059	0.90588	0	0	1.30276	2.22311	1	0	1.28462	1.4078	1	0	1.09352	1.18949	0	0
11/5/2017	1.74539	2.08533	0	0	4.80998	6.79959	1	0	2.14847	1.39473	0	1	25.7837	34.4503	1	0	4.15973	5.54826	0	0	9.95588	6.6588	1	0	0.539326	0.764099	0	0	1.31824	2.22103	0	0	1.36865	1.48787	0	0	1.13153	1.19289	0	0
12/5/2017	1.77582	2.02357	0	0	5.06061	6.67689	1	0	2.17138	2.40692	0	0	23.9596	31.5524	0	0	4.66832	5.08153	0	0	9.34235	6.52023	1	0	0.570356	0.748581	0	0	1.57275	2.30931	0	1	1.55988	1.34016	0	0	1.0462	1.17346	0	0
13/5/2017	1.62187	1.95985	0	0	4.38374	6.49619	1	1	2.17026	2.04178	0	0	23.6359	32.6226	0	0	4.60181	5.8533	0	0	9.18116	6.55199	1	0	0.571128	0.818049	0	0	1.58968	2.12532	0	1	1.27828	1.51486	0	0	1.00679	1.20383	0	0
14/5/2017	1.91815	2.46818	1	0	4.85599	7.32209	0	0	1.62072	2.56905	0	0	26.4696	32.6327	0	0	4.60266	5.3232	0	0	9.74026	6.00102	1	0	0.566256	0.805869	0	0	1.63584	1.95028	0	1	1.37854	1.46906	0	0	0.96859	1.21311	0	0
15/5/2017	1.34176	2.25414	1	0	3.90482	6.5501	0	0	1.58273	2.68552	0	0	28.3285	36.2654	0	0	4.58616	5.26536	0	0	4.00342	6.50245	1	0	0.580991	0.687136	0	0	1.46722	2.00741	0	1	1.3731	1.32153	0	0	0.945295	1.24389	0	0
16/5/2017	1.21078	2.09816	1	0	5.57429	6.38554	0	1	1.30632	3.70488	0	0	34.0553	34.9707	0	0	4.89189	5.21885	0	0	3.08311	5.23976	1	0	0.583006	0.692692	0	0	1.64812	1.94386	0	1	1.38423	1.01398	0	0	0.949143	1.25298	0	0
17/5/2017	1.23954	2.30865	1	0	5.39074	5.77328	0	0	1.20698	3.13577	0	0	29.4914	32.3547	0	1	4.8059	5.10759	0	0	2.75065	5.46195	1	0	0.577201	0.703931	0	0	1.54404	1.84174	0	1	1.40829	1.01816	0	1	1.02376	1.2802	0	0
18/5/2017	1.36922	1.75883	1	0	5.46862	6.66432	0	0	0.994722	3.57063	0	0	29.1447	30.1956	1	1	5.18931	5.46223	0	0	2.75777	5.82217	0	0	0.575735	0.70649	0	0	1.57889	1.9048	0	0	1.29046	1.16297	0	0	1.04192	1.39899	0	0
19/5/2017	1.4017	1.53223	1	1	6.05995	4.50754	0	0	0.951847	2.84563	1	0	30.4935	28.8729	0	1	5.2734	5.19869	0	0	2.97488	7.42915	0	0	0.572105	0.701865	0	0	1.54497	2.0613	0	0	1.32306	1.31714	0	0	1.06603	1.35444	0	0
20/5/2017	1.75926	1.63899	0	0	4.90044	4.59342	0	0	1.60425	2.62418	2	0	59.676	26.2663	0	0	4.44768	5.08676	0	0	3.54956	5.42898	0	0	0.638912	0.746759	0	0	1.57384	1.98455	0	0	1.15618	1.36306	0	0	1.02396	1.51269	0	0
21/5/2017	1.59035	1.6263	0	0	3.30969	4.98981	0	0	1.63475	2.96195	1	0	46.5328	25.2412	1	0	4.27677	4.96949	0	0	3.66902	5.63121	1	0	0.640308	0.753927	0	0	1.4441	1.86658	0	0	1.40088	0.965305	0	0	1.02913	1.58567	0	0
22/5/2017	1.3775	1.55567	0	0	3.45392	4.12956	0	1	1.17108	2.99951	1	1	41.4221	25.0168	0	0	4.50986	5.08031	0	0	3.92407	3.9191	0	0	0.56041	0.898513	0	0	1.4454	1.59096	0	0	1.41593	1.18227	0	0	0.946001	1.35218	0	0
23/5/2017	1.41658	1.4355	0	0	3.81165	3.42214	1	1	1.20141	1.62785	1	1	41.6302	27.4029	0	1	4.13821	4.00836	0	0	3.5151	3.75702	2	0	0.485631	0.898618	0	0	1.70144	1.67881	0	0	1.22719	1.55886	1	0	0.977805	1.30942	0	0
24/5/2017	1.20095	1.34287	0	0	5.99906	3.51219	0	0	1.20689	1.49047	1	1	41.7052	21.0657	0	1	3.77754	4.50923	0	0	3.88882	6.88695	0	1	0.416317	0.909474	0	0	1.55664	1.88947	0	0	1.58733	1.21348	0	0	0.987366	1.24614	0	0
25/5/2017	1.29897	1.26508	0	0	3.62392	4.67695	0	1	1.27604	1.33309	1	1	46.1622	22.2398	0	0	3.22753	4.41152	0	0	3.41621	6.4151	0	1	0.410486	0.898723	0	0	1.48038	1.80094	0	0	1.57624	1.47381	0	0	1.00131	1.37018	0	0
26/5/2017	1.26364	1.33137	0	0	3.25449	4.7076	1	0	1.29206	1.33969	0	1	43.4822	20.8682	0	0	3.33266	4.65973	0	0	4.01699	5.81076	0	0	0.486453	0.994281	0	0	1.31859	1.68561	0	1	1.22893	1.50238	0	0	0.992817	1.0684	0	0
27/5/2017	1.36233	1.72946	0	0	4.52443	4.39605	0	1	1.16931	1.1863	1	1	19.2301	25.7199	0	0	2.9419	4.02059	0	0	3.85061	6.29288	0	0	0.485069	0.856983	0	0	1.38801	1.8037	0	0	0.798477	0.631792	0	0	1.02402	1.04783	0	0
28/5/2017	1.239	1.25581	0	0	4.30963	2.86975	0	1	1.1733	1.3676	1	0	18.7175	24.0982	1	0	2.66787	3.71592	0	0	3.1132	3.40977	0	1	0.495364	0.618561	0	0	1.31791	1.80249	0	0	0.755553	0.674486	0	0	1.0436	1.02607	0	0
29/5/2017	1.17486	1.28532	0	0	2.84277	2.45129	1	0	1.12948	1.04044	0	0	18.0062	22.4742	0	0	2.33059	3.81581	0	0	2.37936	5.38002	1	0	0.533164	0.629572	0	0	1.34501	1.82357	0	0	0.638962	0.761556	1	0	0.968109	0.923273	0	1
30/5/2017	1.1632	1.25048	0	0	4.27637	2.93465	0	0	1.12378	1.07232	0	0	22.4348	23.6617	1	0	2.17605	3.66234	0	0	2.17817	5.36536	0	0	0.536368	0.628394	0	0	1.43817	1.60513	0	0	0.704719	0.771852	0	0	0.941176	0.712311	0	1
31/5/2017	1.38232	1.16413	0	0	5.23696	4.20322	1	0	1.0896	1.01177	0	0	23.0495	22.988	0	0	3.33026	3.76019	0	0	3.20014	3.70509	0	0	0.494057	0.616391	0	0	1.55355	1.55045	0	0	0.622672	0.800123	0	0	0.955499	0.730887	0	0
1/6/2017	1.12191	1.17387	0	0	6.88765	3.96065	0	0	0.929808	0.981648	1	0	16.7123	20.476	1	0	3.38079	3.73222	0	0	3.17614	4.17596	0	0	0.42439	0.609206	0	0	1.51063	1.6647	0	0	0.711925	0.909076	0	0	0.979565	0.75564	0	1
2/6/2017	1.5265	1.04306	0	0	4.62419	3.99702	0	0	1.14161	1.10396	1	0	21.2803	22.0814	0	0	3.75076	3.1053	1	0	3.30804	3.00146	0	0	0.465637	0.603329	0	0	1.5305	1.73977	0	0	0.690564	1.05653	0	1	0.981185	0.865785	0	0
3/6/2017	1.34422	1.20332	0	0	4.38688	3.73376	0	1	1.0563	1.02562	1	0	20.2733	19.8457	1	0	3.1004	2.76096	0	0	3.38703	3.1313	0	1	0.466141	0.596123	0	0	1.46203	1.82635	0	0	0.665095	0.989318	0	0	0.952213	1.04453	0	0
4/6/2017	1.58795	1.57601	0	0	3.58548	3.82866	1	1	0.996953	0.93598	0	0	20.9024	54.9596	1	0	3.81267	3.95366	0	0	3.80546	3.06342	0	1	0.46463	0.644601	0	0	1.50689	1.86691	0	0	0.744983	0.872493	0	0	0.940142	1.08729	0	0
5/6/2017	1.09787	1.60551	1	0	2.86131	5.25664	1	0	1.09856	0.958279	0	0	20.841	53.2605	1	0	2.29221	2.78149	0	0	4.51262	3.15602	0	0	0.456132	0.624669	0	0	1.60455	1.96628	0	0	0.873311	0.947799	0	1	0.823675	0.898173	1	0
6/6/2017	1.21492	1.60621	0	0	3.44552	5.56968	0	0	0.989866	0.993396	1	0	12.1669	51.6219	3	0	1.9058	2.20004	0	0	4.55403	3.41453	0	0	0.489505	0.634168	0	0	1.40701	1.82806	0	0	0.97002	0.89958	0	1	0.924213	0.902031	0	0
7/6/2017	1.37448	1.47762	0	0	2.49828	6.09131	0	0	0.948223	1.00533	1	0	20.7507	57.3009	2	0	2.9605	2.68472	0	0	4.70153	3.0961	0	1	0.414322	0.64312	0	0	1.23674	1.5753	0	0	1.06863	0.86356	0	0	1.00706	0.911119	0	0
8/6/2017	1.14614	1.52526	0	0	2.57935	6.30196	1	0	0.741401	0.914344	1	0	14.0544	56.6169	2	0	2.17393	2.89648	0	0	4.79627	2.83191	0	1	0.414311	0.495777	0	0	1.41365	1.56692	0	0	1.07455	0.622084	0	0	1.01092	1.02104	0	0
9/6/2017	0.912344	1.71562	0	0	2.48421	6.06839	1	0	0.715075	1.11747	0	0	18.1399	53.1207	2	0	2.12607	2.7883	0	1	3.91663	3.24383	0	0	0.447516	0.502825	0	0	1.4105	1.50942	0	0	1.18588	0.721864	0	0	0.953901	0.89589	0	0
10/6/2017	0.877406	1.75196	0	0	4.08663	2.91538	0	0	0.544145	1.21921	0	0	18.327	51.0652	1	0	2.0192	2.61033	0	0	2.81964	2.92806	1	0	0.450122	0.429011	0	0	1.32898	1.26272	0	0	1.20972	0.850028	0	0	0.953784	0.885951	0	0
11/6/2017	0.865644	1.89256	0	0	3.97181	3.36503	0	0	0.509804	1.30931	0	0	15.6455	51.4034	1	0	1.81158	2.88674	0	0	3.75587	3.32648	0	0	0.450265	0.361739	0	0	1.54687	1.51826	0	0	1.11119	0.931043	0	0	0.945509	0.894067	0	0
12/6/2017	0.861678	1.68536	0	0	3.49791	4.11472	0	0	0.528311	1.35623	0	0	18.2826	50.748	1	0	2.16567	2.76794	0	0	3.74582	3.23693	0	0	0.400873	0.35186	0	0	1.95852	1.90983	0	0	1.14638	1.12555	0	0	0.91778	0.889807	0	0
13/6/2017	0.807867	1.4182	1	0	3.49821	3.79412	0	0	0.709919	1.17743	0	1	13.7875	35.6896	2	0	1.68824	2.95747	0	1	3.87843	2.99284	0	0	0.40103	0.366706	0	0	2.07339	1.30925	0	0	1.32021	0.940099	0	0	0.984815	0.889354	0	0
14/6/2017	0.95017	1.0247	1	0	2.6745	3.21967	1	0	0.654167	1.12202	0	1	20.9515	41.5856	2	0	1.05641	3.03493	0	1	2.76139	3.07646	0	0	0.400733	0.368441	0	0	2.0526	1.45567	0	0	1.23399	1.04666	0	0	0.916401	0.94701	0	0
15/6/2017	0.81691	0.947481	1	0	2.9132	3.22589	0	1	0.639401	0.950608	0	1	11.1095	36.4047	1	0	1.15067	2.69982	0	1	2.49905	2.94263	1	0	0.330923	0.480616	0	0	1.87229	1.45826	0	0	1.1355	1.01217	0	0	0.905492	0.902159	0	0
16/6/2017	0.679305	0.919933	1	0	2.15148	3.48345	1	0	0.607531	0.873139	0	1	11.3434	39.957	1	0	1.1315	2.1349	0	1	2.58614	3.44928	1	0	0.331087	0.518248	0	0	1.79759	1.64724	0	0	0.920008	0.953815	1	0	0.904745	0.865863	0	0
17/6/2017	0.708837	0.960174	0	0	1.46803	2.20196	3	0	0.473365	0.821196	0	0	12.1203	27.0016	1	2	1.04056	1.98014	0	1	3.08551	3.22953	0	0	0.333897	0.378889	0	0	1.71963	1.47704	0	0	1.10416	0.972735	0	0	0.925734	0.870135	0	0
18/6/2017	0.629094	0.958635	0	0	1.51035	1.9638	3	0	0.597081	1.14933	0	0	13.5239	27.7184	1	0	1.09713	1.8368	0	1	2.36153	3.35421	1	0	0.337592	0.371046	0	0	1.53882	1.53839	0	0	0.92915	0.77286	0	0	0.903748	0.830419	0	0
19/6/2017	0.580144	0.881901	0	0	0.816558	1.69418	3	1	0.617572	0.756452	0	1	9.91226	28.0378	2	0	1.28227	1.50133	0	0	3.26429	3.47305	0	0	0.372705	0.439569	0	0	1.76336	1.5116	0	0	0.91317	0.851948	0	0	0.78612	0.842649	0	0
20/6/2017	0.5325	0.942838	0	0	1.46606	2.31448	2	1	0.607289	0.698513	0	0	9.07913	36.6445	2	1	1.31224	1.55122	0	0	1.99845	3.54031	0	0	0.371344	0.434836	0	0	1.70413	1.66646	0	0	0.825257	0.735214	0	0	0.770136	0.870893	0	0
21/6/2017	1.23143	0.96175	0	0	1.46405	2.37012	2	1	0.658492	0.77546	0	0	20.5537	31.8326	2	0	1.05417	1.8511	0	0	3.41757	3.63367	0	0	0.295517	0.428929	0	0	1.64111	1.76023	0	0	0.708604	0.792506	0	0	0.776112	0.892639	0	0
22/6/2017	0.351369	0.93332	1	0	2.02606	1.72305	2	1	0.625629	0.843336	0	0	13.1092	31.1327	2	0	0.81945	1.87552	1	0	2.65348	3.0339	0	0	0.292481	0.289908	0	0	1.75432	1.78307	0	0	0.80133	0.933623	0	0	0.781022	0.889519	0	0
23/6/2017	0.48185	0.733301	0	0	2.09197	2.05696	1	0	0.651705	0.473962	0	1	12.8054	30.6604	2	0	0.873863	1.66719	1	0	2.67193	2.74373	1	0	0.2968	0.289805	0	0	1.52336	1.82042	0	0	0.792958	0.926145	0	0	0.727296	0.875618	0	0
24/6/2017	0.558125	0.680247	0	0	3.41961	2.11257	0	1	0.69468	0.791753	0	0	18.9868	32.0132	1	0	0.783508	1.18192	2	2	2.95873	2.95105	0	0	0.295569	0.36379	0	0	1.46972	1.79053	0	0	0.724417	0.858798	0	0	0.732246	0.870789	0	0
25/6/2017	0.558185	0.59683	0	0	3.39628	2.57304	1	0	0.657434	0.96945	0	0	29.2915	31.8483	3	0	0.926511	1.47595	2	0	2.5745	3.39265	0	0	0.331588	0.287766	0	0	1.44311	1.91748	0	0	0.698175	0.844449	0	0	0.766942	0.87563	0	0
26/6/2017	0.551359	0.704943	0	0	1.69229	1.78138	1	1	0.649537	0.711393	0	1	28.0749	31.7862	1	0	0.973741	1.5714	2	0	2.47537	3.23236	0	0	0.297041	0.281553	0	0	1.13002	1.76471	0	0	0.803695	0.83311	0	0	0.744546	0.865873	0	0
27/6/2017	0.457005	0.572988	0	0	2.12277	2.80771	1	0	0.59564	0.783506	0	0	26.8186	26.0175	1	0	0.787761	1.28799	2	0	2.27965	2.799	0	0	0.291913	0.320627	0	0	1.4161	1.54196	0	0	0.816234	0.833913	0	0	0.87639	0.826331	0	0
28/6/2017	0.486735	0.520321	0	0	1.37511	3.79564	1	0	0.564598	0.757116	0	0	24.5009	24.5343	0	1	0.974303	1.57927	3	0	2.35362	3.00834	0	0	0.274336	0.244365	0	0	1.41781	1.72337	0	0	0.777427	0.762697	0	0	0.908449	0.873861	0	0
29/6/2017	0.71236	0.643103	0	0	1.33798	2.643	0	0	0.712017	0.718068	1	0	31.8624	31.7063	0	1	0.905901	1.6263	0	0	2.44639	2.97056	0	0	0.256285	0.279271	0	0	1.388	1.62801	0	0	0.77545	0.822821	0	0	0.760852	0.881868	0	0
30/6/2017	0.623488	0.819765	0	0	1.34586	2.939	1	0	0.743801	0.697827	0	0	24.372	27.4988	0	1	0.731926	1.22833	1	0	2.55461	3.57193	0	0	0.253206	0.27182	0	0	1.43776	2.07128	0	0	0.632142	0.751756	0	0	0.724604	0.894065	0	0
1/7/2017	0.578126	0.505027	0	0	1.72649	4.02994	1	0	0.725594	0.584987	0	0	26.9215	25.1123	0	1	0.741222	1.62564	1	0	2.1851	2.9274	0	0	0.249886	0.221606	0	0	1.43536	1.98733	0	0	0.780986	0.602152	0	0	0.724044	0.864628	0	0
2/7/2017	0.491379	0.688356	0	0	1.24965	3.36019	0	0	0.667609	0.552855	0	0	27.4276	19.803	0	1	0.357277	1.6999	1	1	2.06981	3.09412	0	0	0.216789	0.254628	0	0	1.33563	2.13312	0	0	0.584125	0.599266	0	0	0.804972	0.72546	0	1
3/7/2017	0.436468	1.11909	0	0	1.90783	4.03309	1	0	0.629664	0.545135	0	0	27.3196	26.4044	0	1	0.309431	1.72486	1	1	2.03899	3.16216	0	0	0.207678	0.244269	0	0	1.31686	2.13455	0	0	0.575464	0.603887	1	0	0.785198	0.862954	0	0
4/7/2017	0.381077	0.997238	0	0	1.5026	3.49942	1	0	0.615448	0.905039	0	0	28.0292	25.7264	0	2	0.465905	1.25097	0	1	2.27112	2.64239	1	0	0.201937	0.236817	0	0	1.4295	2.16994	0	0	0.555124	0.621041	0	0	0.762534	0.799186	0	0
5/7/2017	0.538004	0.98423	1	0	1.66906	4.93211	1	0	0.557871	0.865595	0	0	28.6882	26.376	1	1	0.362621	1.25449	0	0	2.20916	2.74368	0	0	0.196343	0.226246	0	0	1.56975	2.03226	0	0	0.661635	0.546637	0	0	0.730778	0.745933	0	0
6/7/2017	0.433458	0.773343	0	0	2.37873	4.36873	1	0	0.521859	0.737585	0	0	25.9689	33.9415	0	2	0.358202	1.10042	0	0	2.49717	2.81444	0	0	0.1883	0.261135	0	0	1.17922	2.2256	0	0	0.63423	0.574698	0	0	0.746043	0.792449	0	0
7/7/2017	0.376072	0.990073	0	0	1.75949	4.24889	0	0	0.533981	0.72148	0	0	25.9239	29.692	0	1	0.557707	1.08619	1	0	2.09886	2.66628	0	0	0.180026	0.253049	0	0	1.2208	1.93854	0	0	0.691906	0.588199	0	0	0.737129	0.851693	0	0
8/7/2017	0.312152	1.01689	0	0	1.28507	4.83754	0	0	0.511935	0.476572	0	1	20.0899	31.2706	0	1	0.402921	1.05531	0	0	1.9252	2.85664	0	0	0.161743	0.253124	0	0	1.16017	1.90258	0	0	0.674429	0.611619	0	0	0.751386	0.80114	0	0
9/7/2017	0.256331	0.965191	0	0	1.90332	3.93397	0	0	0.431733	0.513726	0	1	17.1198	46.5682	0	1	0.375534	1.0626	0	0	2.88567	2.68094	0	0	0.15147	0.245355	0	0	1.19118	1.67276	0	0	0.655513	0.523503	0	0	0.788495	0.806039	0	0
10/7/2017	0.297852	1.01865	0	0	1.3092	3.91769	0	1	0.404479	0.590413	0	1	33.4527	45.7771	1	1	0.35195	1.20957	1	0	2.90221	2.27537	0	0	0.18115	0.231083	0	0	1.20433	1.48154	0	0	0.659913	0.531508	0	0	0.791268	0.82397	0	0
11/7/2017	0.297135	1.05627	1	0	1.36123	3.30773	0	1	0.338786	0.564309	0	0	34.2473	45.8713	0	1	0.350328	1.00675	1	0	1.94281	1.95287	0	0	0.160843	0.22302	0	0	1.16421	1.34121	0	0	0.592182	0.543769	0	0	0.670052	0.883313	0	0
12/7/2017	0.269362	1.08579	1	0	2.64851	3.14603	0	2	0.395936	0.490897	0	1	35.2794	46.4125	0	1	0.318443	0.68298	2	0	1.91512	2.04088	0	0	0.148106	0.217963	0	0	1.13355	1.39684	0	0	0.607758	0.549264	0	0	0.733569	0.867974	0	0
13/7/2017	0.232161	1.06908	1	0	2.5914	2.59239	0	2	0.423615	0.559226	0	1	38.5178	46.6352	0	2	0.354494	0.650084	3	1	1.92902	1.73357	0	0	0.141831	0.209637	0	0	1.17309	1.41597	0	0	0.477724	0.540676	0	0	0.722835	0.880672	0	0
14/7/2017	0.225495	0.917384	1	0	3.48766	2.53288	0	1	0.472735	0.454612	0	2	34.9371	45.6499	1	0	0.409943	0.706209	2	0	1.97885	1.74112	0	0	0.133931	0.198467	0	0	1.15691	1.43204	0	0	0.55183	0.598757	0	0	0.819625	0.844222	0	0
15/7/2017	0.22526	0.980851	1	0	2.21077	2.78463	0	0	0.426567	0.366404	0	2	30.8736	45.4737	1	0	0.445478	0.854878	0	0	1.93069	2.30241	0	0	0.126185	0.182356	0	0	0.972093	1.76501	0	0	0.584838	0.597019	0	0	0.815385	0.782269	0	0
16/7/2017	0.187765	0.961203	1	0	1.48016	3.10594	1	0	0.411299	0.903803	0	1	31.8552	45.5651	0	0	0.440519	0.861055	1	0	2.21867	2.49419	0	0	0.121967	0.17501	0	0	1.01489	1.66926	0	0	0.614997	0.59302	0	0	0.759132	0.795014	0	0
17/7/2017	0.206561	0.96739	2	0	1.76377	3.09247	0	0	0.417148	0.838049	0	1	32.2306	47.6405	1	0	0.508918	0.754675	2	1	2.17866	2.09413	0	0	0.116283	0.170124	0	0	1.09114	1.42292	0	0	0.60645	0.611135	0	0	0.781963	0.826087	0	0
18/7/2017	0.182658	1.02262	2	0	1.54862	2.8738	0	0	0.369487	0.389678	0	1	32.3953	24.376	1	0	0.577933	0.796173	1	1	2.56249	2.54621	0	0	0.111881	0.160925	0	0	1.06852	1.28407	0	0	0.595765	0.712548	0	0	0.812592	0.824448	0	0
19/7/2017	0.167137	0.692647	2	0	1.79323	3.20659	1	0	0.544473	0.343734	0	1	31.9707	24.2743	2	1	0.57886	0.782058	1	1	2.63655	2.66195	0	0	0.106564	0.159847	0	0	1.34324	1.72547	0	0	0.65917	0.768622	0	0	0.77877	0.908552	0	0
20/7/2017	0.222724	0.530146	2	0	1.76692	3.8213	0	0	0.596993	0.278119	0	2	33.9825	23.303	1	1	0.417668	0.656497	1	1	2.44327	2.99186	0	0	0.103199	0.153963	0	0	1.40527	1.56721	0	0	0.591571	0.870567	0	0	0.800408	0.800009	0	0
21/7/2017	0.258551	0.480265	0	0	1.92225	3.9366	0	0	0.632763	0.317191	0	0	33.7598	22.7844	1	1	0.240945	0.736472	3	1	2.47685	2.79811	0	0	0.100979	0.153629	0	0	1.48541	1.4566	0	0	0.557482	0.712961	0	0	0.831592	0.80285	0	0
22/7/2017	0.238174	0.385492	0	0	1.07413	2.20341	0	0	0.542206	0.272647	0	1	34.7841	22.502	0	0	0.276038	0.664518	1	0	2.30383	2.74828	0	0	0.103015	0.138288	0	0	1.50398	1.47405	0	0	0.559992	0.653084	0	0	0.855852	0.784385	0	0
23/7/2017	0.176865	0.433225	0	0	2.07052	1.47097	0	0	0.579625	0.27437	0	1	34.4102	21.9113	1	0	0.245309	0.649042	1	1	2.15799	2.95895	0	0	0.0972663	0.129108	0	0	1.25208	1.45729	0	0	0.623506	0.717694	0	0	0.856636	0.755433	0	0
24/7/2017	0.163974	0.4254	0	0	1.74103	1.36917	0	0	0.457509	0.266596	1	2	34.7556	22.991	1	0	0.187375	0.516495	2	1	1.98992	2.17246	0	1	0.0920768	0.124486	0	0	1.30061	1.46505	0	0	0.722132	0.6172	0	0	0.933386	0.760763	0	0
25/7/2017	0.259928	0.382259	0	0	1.95125	1.61235	0	1	0.397935	0.443276	0	0	33.399	23.3076	1	0	0.364495	0.464185	0	1	1.97334	2.23928	0	1	0.0882496	0.117445	0	0	1.27865	1.49518	0	0	0.68309	0.581495	0	0	0.93763	0.76615	0	0
26/7/2017	0.20915	0.394703	0	0	1.89323	2.36311	0	1	0.351428	0.464619	0	1	32.4767	23.8856	1	1	0.187735	0.467758	1	0	1.9523	2.49858	0	0	0.0858199	0.114149	0	0	1.32164	1.5078	0	0	0.725774	0.579019	0	0	0.801442	0.73613	0	0
27/7/2017	0.230129	0.376487	0	0	1.69616	2.08315	0	0	0.38529	0.382783	0	1	33.0162	22.0567	1	1	0.20205	0.45628	1	0	1.65097	2.6935	1	0	0.0861411	0.10103	0	0	1.39274	1.49383	0	0	0.688066	0.578462	0	0	0.822629	0.752358	0	0
28/7/2017	0.235322	0.344227	0	1	3.51605	1.69957	0	0	0.348018	0.520274	0	0	30.2786	26.7233	2	1	0.202943	0.323406	2	1	1.67364	2.37052	0	1	0.0825183	0.102055	0	0	1.53951	1.41608	0	0	0.677297	0.664529	0	0	0.953266	0.744886	0	0
29/7/2017	0.178397	0.331134	0	1	2.03102	1.83822	0	0	0.37759	0.333284	0	1	30.0393	26.682	2	1	0.204633	0.359741	2	1	1.69449	3.22689	1	0	0.0723551	0.101786	0	0	1.57506	1.53742	0	0	0.678628	0.640248	0	0	0.952082	0.732704	0	0
30/7/2017	0.229511	0.297826	0	0	1.41013	2.00056	0	0	0.419259	0.311421	0	1	28.2485	26.0919	2	1	0.233317	0.32769	1	0	1.70248	3.06233	0	0	0.072032	0.101238	0	0	1.50934	1.59314	0	0	0.610714	0.669214	0	0	0.935162	0.740139	0	0
31/7/2017	0.264969	0.264198	0	1	2.05068	2.22025	0	0	0.422328	0.374853	0	1	31.6277	20.7133	2	1	0.237766	0.285851	1	1	1.7677	2.64111	1	0	0.0673306	0.10629	0	0	1.49612	1.43834	0	0	0.634537	0.587631	0	0	0.933181	0.720165	0	0
1/8/2017	0.193615	0.234347	0	0	2.04396	3.04726	0	1	0.308662	0.351334	0	1	28.7292	24.555	1	1	0.249579	0.263875	1	1	2.0506	2.54188	1	0	0.0618787	0.107392	0	0	1.39558	1.32075	0	0	0.622594	0.567388	0	0	0.89478	0.7232	0	0
2/8/2017	0.221279	0.22921	0	0	2.11976	2.57616	0	0	0.251559	0.436076	0	0	26.9572	23.1699	1	1	0.237865	0.261695	1	1	2.26768	2.40349	0	0	0.0567714	0.109102	0	0	1.36695	1.44491	0	0	0.591367	0.695761	1	0	0.899359	0.763272	0	0
3/8/2017	0.203051	0.223405	0	0	2.43095	2.40564	0	0	0.271882	0.394358	0	0	27.7672	24.383	1	1	0.23818	0.252731	1	1	2.06452	2.19012	0	0	0.0500385	0.110579	0	0	1.23006	1.428	0	0	0.629445	0.577227	0	0	0.905087	0.826667	0	0
4/8/2017	0.223731	0.330035	0	0	2.35487	1.93272	0	0	0.277947	0.450129	0	1	28.8232	21.9509	1	1	0.239196	0.260659	1	0	1.72681	1.96537	0	0	0.0486341	0.110405	0	0	1.43992	1.40875	0	0	0.586089	0.529777	0	0	0.922683	0.822559	0	0
5/8/2017	0.216813	0.275819	0	1	2.14452	1.81852	0	1	0.287049	0.293673	0	1	36.4852	24.1347	1	0	0.237538	0.26205	1	2	1.75076	1.87408	0	0	0.0451535	0.106287	0	0	1.41556	1.22909	0	0	0.630286	0.520504	0	0	0.891532	0.843108	0	0
6/8/2017	0.188974	0.322985	1	0	2.32705	1.68839	0	1	0.295116	0.303729	0	0	23.643	21.831	1	0	0.237703	0.274594	1	2	1.81304	2.21998	0	0	0.0420705	0.102841	0	0	1.27876	1.37421	0	0	0.622966	0.512409	0	0	0.98551	0.90307	0	0
7/8/2017	0.188	0.31217	1	0	2.73965	1.44239	0	1	0.238752	0.363182	0	0	23.4231	26.5902	0	2	0.275538	0.239858	1	1	2.06479	2.70324	0	0	0.0404585	0.100288	0	0	1.2267	1.37802	0	0	0.630338	0.629306	0	0	1.05189	0.883391	0	0
8/8/2017	0.28184	0.358828	1	0	3.17927	1.88808	0	0	0.236002	0.341711	0	0	30.3232	23.6904	0	2	0.242207	0.247808	2	1	1.68263	2.5506	1	0	0.0399622	0.0969906	0	0	1.32837	1.31815	0	1	0.625841	0.643986	0	0	1.12504	0.899145	0	0
9/8/2017	0.213046	0.287921	0	0	3.03362	2.03552	0	0	0.156787	0.361682	0	0	13.6716	23.2976	0	0	0.260453	0.32687	1	1	1.94893	2.17717	0	0	0.0406351	0.0890721	0	0	1.27053	1.32222	0	1	0.550172	0.575229	0	0	1.09938	0.789686	0	0
10/8/2017	0.251507	0.624595	0	0	2.53642	1.48414	0	1	0.1346	0.377989	1	0	21.4885	23.1732	1	0	0.263188	0.231679	1	3	1.80137	2.69122	0	0	0.0357571	0.0895321	0	0	1.33157	1.59247	0	0	0.468134	0.483856	0	1	1.16504	0.800774	0	0
11/8/2017	0.254365	0.322077	0	0	1.74839	1.32342	0	0	0.204241	0.384432	0	0	17.8832	28.7887	0	1	0.226717	0.313148	1	2	2.07606	2.84095	0	0	0.0336326	0.0913903	0	0	1.40639	1.28651	0	0	0.562661	0.525908	0	1	1.17747	0.801449	0	0
12/8/2017	0.254858	0.244586	0	0	1.70231	1.18529	0	1	0.189669	0.280515	0	0	23.6675	19.8469	0	2	0.220509	0.309602	1	2	2.32112	2.70992	0	0	0.0393258	0.0849427	0	0	1.37337	1.50498	0	0	0.58411	0.512695	0	0	1.06007	0.790124	0	0
13/8/2017	0.27048	0.259692	0	0	1.66661	1.21747	0	1	0.19783	0.318571	0	0	14.8846	21.6699	0	1	0.208097	0.324414	2	2	2.67116	2.67767	0	0	0.0405874	0.0834704	0	0	1.43261	1.49205	0	0	0.693564	0.522045	0	0	1.07567	0.801849	0	0
14/8/2017	0.266248	0.301045	0	0	1.92317	2.16625	0	1	0.227172	0.251756	0	1	14.739	18.4855	1	2	0.238749	0.334013	0	1	2.90429	2.41495	0	0	0.0363571	0.0829182	0	0	1.55189	1.44912	0	0	0.65841	0.575277	0	0	1.10976	0.800122	0	0
15/8/2017	0.132378	0.357205	0	0	2.22767	1.83857	0	1	0.213283	0.232397	0	1	24.6797	16.5259	0	2	0.234885	0.367078	1	1	2.43034	2.14454	0	0	0.0357715	0.0731957	0	0	1.54914	1.39897	0	0	0.615788	0.537485	0	0	1.0921	0.78407	0	0
16/8/2017	0.12974	0.39182	1	0	1.98625	1.54279	1	1	0.49242	0.222705	0	1	22.9305	20.1273	1	2	0.237493	0.326062	1	0	2.50042	1.94493	0	0	0.0368722	0.0719188	0	0	1.47042	1.38662	0	0	0.582092	0.519343	0	0	0.990199	0.775063	0	0
17/8/2017	0.131666	0.382441	2	0	2.0525	1.83627	1	0	0.472003	0.232946	0	1	22.7669	20.1561	1	1	0.227811	0.31705	0	0	2.62238	1.82373	0	0	0.0385044	0.0653365	0	0	1.58458	1.31133	0	0	0.592638	0.547981	0	0	0.802832	0.798864	0	0
18/8/2017	0.234119	0.408143	1	0	3.47832	1.43659	0	0	0.398941	0.250383	0	1	26.8216	17.6778	1	1	0.238168	0.30211	0	0	2.61412	1.95888	0	0	0.0377344	0.0709089	0	0	1.67045	1.18682	0	0	0.599577	0.687746	0	0	0.800331	0.799838	0	0
19/8/2017	0.223392	0.439729	0	0	3.64358	1.39952	0	0	0.44138	0.264179	0	0	22.6033	17.2929	2	1	0.245742	0.274244	1	1	2.05285	2.3206	0	0	0.0383976	0.0614838	0	0	1.51692	1.31704	0	0	0.648404	0.668383	0	0	0.756727	0.810498	0	0
20/8/2017	0.156236	0.367996	0	0	1.82245	1.32857	0	0	0.440854	0.17221	0	0	23.3568	17.3308	3	3	0.245407	0.306038	0	0	1.9098	2.24835	0	0	0.0350449	0.0615582	0	0	1.22212	1.30424	0	0	0.651856	0.655648	0	0	0.727291	0.805633	0	0
21/8/2017	0.188297	0.406435	1	0	1.79805	1.53532	0	0	0.434183	0.158802	0	0	19.6618	16.8948	2	3	0.224252	0.300169	1	0	1.93889	2.31916	0	0	0.0325551	0.0612672	0	0	1.14342	1.29293	0	0	0.628897	0.623328	0	0	0.760031	0.815132	0	0
22/8/2017	0.271074	0.410731	1	0	1.53282	0.665707	0	1	0.385846	0.158113	0	0	25.371	16.2896	2	3	0.331043	0.306175	1	0	2.34356	2.21211	1	0	0.0327051	0.0533904	0	0	1.21199	1.12007	0	0	0.613119	0.651062	0	0	0.701353	0.804113	0	0
23/8/2017	0.186803	0.445679	1	0	2.82442	0.695811	0	0	0.391238	0.166927	0	0	26.1232	22.8833	1	1	0.348911	0.299539	1	0	2.68587	2.32476	0	0	0.0388141	0.0466328	0	0	1.39908	1.10076	0	0	0.752491	0.487235	0	0	0.755034	0.806414	0	0
24/8/2017	0.206368	0.515238	1	0	1.66876	0.813421	0	0	0.174531	0.158506	0	0	35.2141	17.3938	1	1	0.360774	0.281392	0	0	2.86244	1.94031	0	0	0.0347856	0.049409	0	0	1.59485	1.39363	0	0	0.741779	0.47984	0	0	0.768236	0.77196	0	0
25/8/2017	0.219727	0.461027	1	1	1.76497	0.770729	0	0	0.174486	0.164308	0	0	31.6817	16.7812	0	3	0.350689	0.292323	0	0	3.22685	1.89606	0	0	0.03596	0.0484049	0	0	1.66475	1.46438	0	0	0.760113	0.545506	0	0	0.744068	0.852003	0	0
26/8/2017	0.387017	0.525619	0	1	1.8569	0.749381	0	0	0.203316	0.150297	0	0	31.6805	18.048	0	3	0.351639	0.302801	1	0	3.14816	1.94561	0	0	0.0365522	0.0436273	0	0	1.48212	1.6306	0	0	0.708391	0.687554	0	0	0.796255	0.82959	0	0
27/8/2017	0.427616	0.348742	1	1	0.702593	0.698658	0	0	0.15912	0.166938	0	0	37.215	9.71915	0	1	0.335323	0.278716	0	0	3.16073	1.7468	0	0	0.0422493	0.0410746	0	0	1.39539	1.48572	0	0	0.686378	0.701645	0	0	0.814708	0.86676	0	0
28/8/2017	0.383915	0.328971	1	1	0.768188	0.550511	2	0	0.154312	0.154009	0	0	39.2766	10.114	1	0	0.32698	0.276239	0	0	2.66768	1.89406	0	0	0.0408262	0.0499172	0	0	1.34282	1.40036	0	0	0.595201	0.646773	0	0	0.797112	0.828792	0	0
29/8/2017	0.207251	0.257706	0	2	0.735729	0.410527	1	0	0.143325	0.167511	0	0	39.85	7.52052	0	1	0.335165	0.509893	1	0	2.6411	1.86007	0	0	0.041146	0.0526918	0	0	1.31846	1.14934	0	0	0.623708	0.588518	0	0	0.805193	0.7573	0	0
30/8/2017	0.203426	0.388543	0	1	0.722569	0.431928	1	0	0.718518	0.167824	0	0	38.8914	18.3824	1	1	0.328128	0.270253	0	0	2.5226	1.90826	0	0	0.046734	0.0508283	0	0	1.28568	1.40839	0	0	0.596168	0.426314	0	0	0.792988	0.743943	0	0
31/8/2017	0.164321	0.243283	1	1	1.10489	0.574712	0	1	0.142537	0.157133	0	0	37.3118	14.5014	1	0	0.318487	0.268463	0	0	2.03942	1.80717	0	0	0.047186	0.0521228	0	0	1.30638	1.07586	0	0	0.726196	0.493206	0	0	0.802227	0.787581	0	0
1/9/2017	0.197299	0.335619	0	0	1.15945	0.749302	0	0	0.156208	0.146577	0	0	34.4289	10.6298	1	0	0.315407	0.342582	0	0	1.8878	2.21363	0	0	0.0552798	0.0594322	0	0	1.31102	1.06806	0	0	0.730628	0.471507	0	0	0.813437	0.924794	0	0
2/9/2017	0.256365	0.165487	1	2	1.16158	0.649364	0	1	0.147997	0.152237	0	0	34.8315	23.1097	1	0	0.288677	0.329645	1	0	2.84982	2.10531	0	0	0.062947	0.0574311	0	0	1.29638	1.06998	0	0	0.719713	0.443501	0	0	0.86007	0.919065	0	0
3/9/2017	0.213002	0.367884	1	0	0.894172	0.647198	0	1	0.170329	0.143796	0	0	33.0872	19.0881	2	1	0.29524	0.300909	1	0	2.06598	1.75782	0	0	0.0718418	0.0600746	0	0	1.27448	0.994071	0	0	0.755385	0.411279	0	0	0.845695	0.816181	0	0
4/9/2017	0.245815	0.392122	0	0	0.850455	0.759644	0	0	0.166024	0.122746	0	1	33.4947	21.7401	1	0	0.301998	0.313247	1	0	1.71206	1.83142	0	0	0.0852198	0.0645056	0	0	1.04297	0.963403	0	0	0.782198	0.450761	0	0	0.862692	0.940138	0	0
5/9/2017	0.255583	0.384125	0	0	0.761813	1.12056	0	0	0.390358	0.10434	0	2	27.1783	21.6373	1	1	0.291423	0.320689	0	0	2.23154	2.00047	0	0	0.0945359	0.0754895	0	0	1.05878	1.08673	0	0	0.842512	0.644273	0	0	0.876531	0.99067	0	0
6/9/2017	0.351684	0.321896	0	1	0.73546	0.821546	1	0	0.345158	0.0990786	0	1	27.5096	13.3902	1	2	0.325745	0.336305	0	0	2.53935	2.16106	0	0	0.116015	0.0693475	0	0	1.04577	1.11202	0	0	0.763349	0.652863	0	0	0.946799	0.83484	0	1
7/9/2017	0.352273	0.292154	0	1	0.878817	0.876203	1	0	0.32194	0.110185	0	2	31.1735	14.6571	1	1	0.337935	0.318394	0	0	2.30332	2.03914	0	0	0.127765	0.0751495	0	0	1.30002	1.18437	0	0	0.626972	0.588946	0	0	0.928038	0.839598	0	0
8/9/2017	0.326336	0.266427	0	1	0.870366	0.898125	1	0	0.324001	0.121637	0	0	33.6781	19.0958	1	2	0.333403	0.310315	0	0	2.16745	2.97279	0	0	0.135227	0.0874478	0	0	1.2278	1.23385	0	0	0.600701	0.590232	0	0	0.943961	0.68565	0	0
9/9/2017	0.360266	0.288733	0	0	0.808105	0.967103	2	0	0.287699	0.141367	0	0	33.6434	18.4393	1	1	0.334093	0.320013	0	0	1.85018	2.88306	0	0	0.140846	0.0877776	0	0	1.18355	1.19765	0	0	0.594428	0.681093	0	0	0.952164	0.702016	0	0
10/9/2017	0.333114	0.221031	0	0	0.771929	0.785581	1	0	0.299515	0.092162	0	1	32.3331	13.3264	1	2	0.336213	0.340868	0	0	1.74006	2.19112	0	0	0.144584	0.0892478	0	0	1.16831	1.1594	0	0	0.668147	0.806844	0	0	0.965715	0.703969	0	0
11/9/2017	0.368699	0.280629	0	0	0.810459	0.827991	1	0	0.32463	0.110799	0	1	27.9099	16.6332	1	1	0.320644	0.330266	0	0	1.66936	2.18475	0	0	0.159961	0.104261	0	0	1.2005	1.08682	0	0	0.68337	0.755248	0	0	0.939876	0.73823	0	0
12/9/2017	0.336956	0.189592	0	0	0.247608	0.667222	0	0	0.312632	0.120894	0	1	26.8504	16.0027	1	1	0.293586	0.322381	1	0	1.83682	2.14267	0	0	0.175723	0.101906	0	0	1.00892	1.10951	0	0	0.66699	0.744699	0	0	0.995151	0.768889	0	0
13/9/2017	0.323459	0.328772	0	0	0.310602	0.65581	0	0	0.318531	0.120906	0	2	25.5998	27.484	1	0	0.299593	0.326744	0	0	2.34722	2.40367	0	0	0.184593	0.110278	0	0	1.16729	1.07174	0	0	0.644643	0.699048	0	0	0.935622	0.814661	0	0
14/9/2017	0.30794	0.239125	0	0	0.225427	0.4625	0	1	0.216139	0.115307	0	2	20.3326	26.313	2	1	0.275537	0.330928	1	0	2.24037	2.42838	0	0	0.181963	0.128829	0	0	1.14135	1.08182	0	0	0.720603	0.536235	0	0	0.92124	0.845028	0	0
15/9/2017	0.362957	0.233174	0	0	0.371134	0.474874	1	1	0.222367	0.118686	0	2	23.2273	25.6091	2	1	0.295587	0.330908	0	0	2.16301	2.35758	1	0	0.189425	0.138765	0	0	1.15856	1.09786	0	0	0.758756	0.556531	0	0	0.931443	0.802198	0	0
16/9/2017	0.271822	0.160387	0	0	0.508824	0.626358	1	1	0.211623	0.117045	0	2	20.6994	24.3618	2	1	0.282071	0.313431	1	0	2.17828	2.42213	1	0	0.152999	0.147051	0	0	1.02443	1.06727	0	0	0.741087	0.53528	0	0	0.944529	0.793535	0	0
17/9/2017	0.658487	0.183632	0	0	0.382536	0.596082	0	1	0.227038	0.101326	0	2	19.61	25.8476	2	1	0.284247	0.319699	1	0	2.10981	2.60078	1	0	0.162367	0.158224	0	0	1.12209	1.06102	0	0	0.634901	0.538111	0	0	0.991724	0.78856	0	0
18/9/2017	0.479243	0.39129	1	0	0.444899	0.606523	1	0	0.174612	0.18425	0	1	17.5722	24.3932	1	1	0.290942	0.322055	0	0	2.89388	2.58175	0	0	0.173248	0.161846	0	0	1.28199	1.0475	0	0	0.847787	0.591571	0	0	1.08026	0.806656	0	0
19/9/2017	0.573793	0.354116	0	0	0.446735	0.53757	0	1	0.175679	0.17024	0	1	13.0014	24.5607	1	1	0.309977	0.31709	0	0	2.25407	2.48962	0	0	0.180529	0.16338	0	0	1.2099	1.07624	0	0	0.828244	0.645922	0	0	1.10213	0.965869	0	0
20/9/2017	0.628338	0.366867	0	0	0.409679	0.403257	0	0	0.217706	0.200381	0	2	19.8379	34.7352	1	1	0.374941	0.300867	0	0	2.2735	2.51732	0	0	0.189072	0.176957	0	0	1.19691	1.09412	0	0	0.669979	0.680192	0	0	1.09068	0.86644	0	0
21/9/2017	0.718948	0.285824	0	0	0.438266	0.377508	0	0	0.235735	0.205684	0	1	22.3244	34.2874	1	1	0.39699	0.3023	0	0	2.17596	2.18743	0	0	0.202663	0.177619	0	0	1.65168	1.17649	0	0	0.664901	0.661401	0	0	1.1221	0.868537	0	0
22/9/2017	0.849136	0.221792	0	1	0.425459	0.471881	0	0	0.170885	0.286967	0	1	22.8484	32.8648	1	1	0.505891	0.294334	0	0	2.12822	2.19492	0	0	0.207961	0.178129	0	0	1.65098	1.09502	0	0	0.672433	0.668198	0	0	1.08508	0.854178	0	0
23/9/2017	0.824241	0.259251	0	0	0.438172	0.430206	0	0	0.18479	0.291277	0	1	22.9882	34.1582	1	1	0.465172	0.29492	0	0	1.95907	2.10531	0	0	0.216103	0.184959	0	0	1.57248	1.36693	0	0	0.694386	0.656496	0	0	1.1202	0.828365	0	0
24/9/2017	0.696976	0.219163	0	1	0.540682	0.691481	0	0	0.174121	0.292937	1	1	17.6435	39.2583	1	0	0.464715	0.300893	0	0	1.74294	2.02353	0	0	0.224382	0.19454	0	0	1.51554	1.28117	0	0	0.647465	0.575504	0	0	1.00728	0.823149	0	0
25/9/2017	0.698856	0.290359	0	0	0.465771	0.880782	0	0	0.194598	0.304102	0	1	17.7152	41.2284	0	0	0.481873	0.315055	0	0	1.55257	2.12982	1	0	0.231922	0.193637	0	0	1.42686	1.43426	0	0	0.55501	0.556606	0	0	1.02614	0.808887	0	0
26/9/2017	0.864771	0.290045	0	0	0.463075	1.40223	0	0	0.190868	0.405133	0	1	17.2562	34.4729	1	0	0.455475	0.335232	0	0	1.82066	2.32867	0	0	0.239151	0.202423	0	0	1.48528	1.53788	0	0	0.516931	0.616344	0	0	0.883682	0.807385	0	0
27/9/2017	0.394562	0.250815	0	0	0.67629	1.60644	0	0	0.194867	0.690647	0	0	19.6738	27.6891	0	0	0.453388	0.334291	0	0	1.7691	2.56689	0	1	0.245057	0.21516	0	0	1.4652	1.65027	0	0	0.59725	0.669682	0	0	0.954348	0.80682	0	0
28/9/2017	0.391241	0.289289	0	0	0.559263	2.35173	0	0	0.206799	0.685862	0	0	36.8037	12.5177	0	2	0.495161	0.407779	0	0	2.26734	2.681	0	0	0.254316	0.225987	0	0	1.70032	1.41485	0	0	0.641656	0.599645	0	0	0.893587	0.801293	0	0
29/9/2017	0.428121	0.264521	0	0	0.651686	1.46055	0	0	0.274879	0.72557	0	0	23.1998	17.6376	1	0	0.457682	0.440696	0	0	2.135	2.62735	0	0	0.288681	0.229051	0	0	1.83512	1.51941	0	0	0.722818	0.586778	0	0	0.879984	0.829049	0	0
30/9/2017	0.394718	0.400765	0	0	0.763644	1.67078	0	0	0.292169	0.930588	0	0	24.0687	13.8589	0	0	0.458874	0.30218	1	0	2.28765	2.53669	0	0	0.254983	0.196081	0	0	1.73437	1.31835	0	0	0.646834	0.637632	0	0	0.893266	0.849647	0	0
1/10/2017	0.640744	0.400304	0	0	1.00741	1.70326	0	0	0.448743	0.475114	0	0	18.901	13.0312	0	1	0.395096	0.2906	1	0	2.45552	2.24727	0	1	0.218267	0.202797	0	0	1.45027	1.66558	0	0	0.799243	0.664806	0	0	0.886712	0.872514	0	0
2/10/2017	0.67439	0.373452	0	0	1.09013	1.84022	0	0	0.44789	0.469002	0	0	19.4026	27.2273	0	1	0.382493	0.327145	1	0	2.00429	2.46364	0	1	0.174677	0.214258	0	0	1.49496	1.90947	0	0	0.821978	0.698137	0	0	0.889939	0.870024	0	0
3/10/2017	0.567303	0.35337	0	0	1.00381	2.28201	0	0	0.347923	0.366156	0	0	19.7301	28.7672	0	1	0.386707	0.325636	1	0	2.2233	2.46797	0	1	0.323924	0.301516	0	0	1.61962	2.07511	0	0	0.742543	0.650966	0	0	0.835345	0.968735	0	0
4/10/2017	0.651469	0.343567	0	0	0.915089	2.21298	0	0	0.380149	0.330833	0	0	20.6581	9.20965	0	1	0.377647	0.280458	1	0	2.25139	2.68537	0	1	0.322519	0.310035	0	0	1.52044	1.8315	0	0	0.781745	0.606727	0	0	0.874885	0.967478	0	0
5/10/2017	0.655498	0.339788	0	1	1.05154	2.20632	0	0	0.576125	0.298528	0	0	24.5822	10.6526	0	1	0.399154	0.2968	0	0	2.3341	2.64902	0	1	0.325102	0.266766	0	0	1.45917	1.89353	0	0	0.698395	0.605496	0	0	0.869107	0.980502	0	0
6/10/2017	0.528639	0.256021	0	2	2.00133	2.11729	0	0	0.366131	0.352557	0	0	40.3239	18.1428	0	1	0.382433	0.297888	1	0	2.12907	2.47056	0	1	0.329756	0.180578	0	0	1.40786	1.87919	0	0	0.751015	0.590956	0	0	1.05712	0.948931	0	0
7/10/2017	0.533536	0.4327	0	0	1.99308	1.80095	0	0	0.381977	0.378689	1	0	34.5171	21.8633	0	0	0.397828	0.293818	0	1	2.33731	2.73888	0	1	0.339397	0.180856	0	0	1.63968	2.04372	0	0	0.812498	0.650948	0	0	1.0983	0.981178	0	0
8/10/2017	0.523902	0.450975	0	0	2.25396	2.01926	0	0	0.26678	0.465753	1	0	27.2692	25.0757	0	1	0.35502	0.294443	0	0	2.57192	2.97311	0	0	0.343864	0.185118	0	0	1.36326	1.75485	0	0	0.70569	0.692084	0	0	1.10109	1.01671	0	0
9/10/2017	0.539642	0.467741	0	2	2.91918	1.45405	0	0	0.413257	0.457086	1	1	26.0828	26.9041	0	0	0.369904	0.366703	0	0	2.84898	2.81549	0	0	0.348696	0.196211	0	0	1.49422	1.61127	0	0	0.630341	0.792721	0	0	1.11314	1.00382	0	0
10/10/2017	0.56658	0.451402	0	2	2.8726	1.42748	0	0	0.50963	0.509979	0	0	21.3713	35.364	0	0	0.468669	0.426482	0	0	1.91463	3.1698	0	0	0.346757	0.207425	0	0	1.48665	1.3147	0	0	0.653547	0.851081	0	0	1.09489	1.00887	0	0
11/10/2017	0.603608	0.653426	0	0	2.07816	1.5122	0	0	0.509633	0.481787	0	0	22.7599	32.157	0	0	0.446776	0.446036	1	0	1.46631	3.48499	0	0	0.304171	0.28431	0	0	1.55038	1.14774	0	0	0.833973	0.861348	0	0	1.07358	0.985611	0	0
12/10/2017	0.673232	0.546462	0	0	1.89362	1.59983	0	0	0.52711	0.40513	0	1	20.1571	32.8367	1	0	0.47019	0.479711	0	0	1.67857	3.53706	1	0	0.313934	0.354313	0	0	1.72692	1.33517	0	0	0.764317	0.877477	0	0	1.09481	0.962299	0	0
13/10/2017	0.627957	0.542427	0	1	1.66085	1.71358	0	0	0.429473	0.335951	0	1	19.6418	33.4861	0	1	0.437667	0.455303	1	0	1.93708	3.67058	0	0	0.272304	0.314674	0	0	1.6201	1.60617	0	0	0.985863	0.881566	1	0	1.17875	0.97006	0	0
14/10/2017	0.533909	0.507499	0	1	2.57359	1.77283	0	0	0.282362	0.791117	0	0	20.2994	59.6347	1	0	0.466205	0.49465	0	0	1.88655	3.66958	0	0	0.314339	0.338545	0	0	1.72949	1.43061	0	0	0.865141	0.779556	1	0	1.05175	0.892514	0	0
15/10/2017	0.413079	0.683539	1	0	2.68225	1.68447	0	0	0.324169	0.764144	1	1	28.092	42.8859	0	0	0.378553	0.421351	0	0	1.92711	3.61332	0	0	0.323358	0.345957	0	0	1.67734	1.39127	0	0	0.714104	0.832121	0	0	1.15701	0.985158	0	0
16/10/2017	0.585181	0.761179	0	0	2.39618	2.34123	1	0	0.313901	0.80396	1	1	14.4756	39.3278	0	0	0.388314	0.482208	1	0	1.82344	3.75944	0	0	0.287033	0.311357	0	0	1.74435	1.69376	0	0	0.507459	1.08082	0	0	1.00821	0.959866	0	0
17/10/2017	0.781804	0.855752	0	0	1.90882	2.46116	0	0	0.380641	0.811237	1	0	18.3484	39.01	0	0	0.502331	0.792891	0	1	1.87469	4.24545	0	0	0.352201	0.375037	0	0	1.68917	1.51406	0	0	0.557896	1.003	0	0	1.03367	1.00811	0	0
18/10/2017	0.797245	0.849034	0	0	2.82742	2.45431	0	0	0.490076	0.744498	1	1	16.978	38.1658	2	0	0.378393	0.423306	0	1	2.4955	4.05194	0	0	0.345439	0.373974	0	0	1.45381	1.56936	0	0	0.676688	1.02018	0	0	1.04449	0.971485	0	0
19/10/2017	0.525987	0.863403	0	0	2.92688	2.75147	0	0	0.59118	0.729932	1	1	35.4505	47.8376	1	0	0.396771	0.461404	1	0	1.79297	4.55459	0	0	0.35661	0.375966	0	0	1.67344	1.66011	0	0	0.573921	0.989896	0	0	1.01971	0.994223	0	0
20/10/2017	0.50673	0.819254	1	0	2.93588	3.11149	0	0	0.486298	0.816862	1	0	38.2462	50.1331	1	0	0.480258	0.574129	1	0	2.34283	3.74662	0	0	0.362867	0.443519	0	0	1.93971	2.04052	0	0	0.537383	1.20687	0	0	1.01101	0.986241	0	0
21/10/2017	0.68987	0.93231	1	0	3.14205	2.08849	1	0	0.476785	0.885168	0	0	35.6194	59.5984	1	0	0.603143	0.497152	0	1	2.26624	4.05349	0	0	0.309003	0.440456	1	0	1.30549	1.86909	0	0	0.416299	0.906714	1	0	1.05619	0.947224	0	0
22/10/2017	0.628077	1.02097	0	0	3.39212	2.7665	1	0	0.556963	0.497665	0	1	28.4827	62.3581	1	0	0.431103	0.370016	0	1	2.84059	4.0198	0	0	0.263796	0.396965	1	0	1.17399	1.99635	0	0	0.561608	0.887269	0	1	1.07681	0.989351	0	0
23/10/2017	0.679056	0.939827	0	0	3.77712	2.833	0	0	0.405907	0.478322	0	0	29.0843	62.0188	1	0	0.507008	0.364089	0	0	3.05431	5.08845	0	0	0.244889	0.412649	1	0	1.18655	1.75337	0	0	0.545811	1.13314	0	0	1.08106	1.0085	0	0
24/10/2017	1.61475	0.918173	1	0	3.6347	2.65321	1	0	0.432995	0.713712	0	0	31.5183	60.7127	0	0	0.456078	0.401834	0	0	3.21975	5.05189	0	0	0.242623	0.431126	2	0	1.42208	1.80084	0	0	0.504239	1.07533	1	0	1.1147	0.934792	0	0
25/10/2017	1.11435	1.48662	0	0	3.43122	2.20092	1	0	0.393746	0.614048	0	0	34.0636	66.5767	0	0	0.438716	0.387277	0	0	3.02832	11.946	0	1	0.289122	0.392378	2	0	1.45799	1.68366	0	0	0.530971	0.974623	0	0	1.06428	1.00109	0	0
26/10/2017	1.08169	1.21223	1	1	4.05322	2.18218	1	0	0.400151	0.801823	0	0	30.3462	64.8154	0	0	0.561962	0.73338	0	0	2.91029	10.2059	0	0	0.279723	0.461639	2	0	1.49594	1.8174	0	0	0.553219	1.09427	1	0	1.12576	1.08374	0	0
27/10/2017	1.28482	1.20071	0	2	4.26205	1.8609	0	0	0.602346	1.11805	0	0	63.3617	65.5244	0	0	0.564058	0.409702	0	0	3.19276	10.177	1	0	0.278776	0.412178	2	1	1.47604	1.58971	0	0	0.976656	0.877609	0	0	1.12584	1.15951	0	0
28/10/2017	0.996519	2.00043	0	1	4.3728	1.75884	0	0	0.469118	0.804009	0	0	47.5631	64.5851	0	0	0.600047	1.02842	0	0	2.87711	5.56308	0	0	0.405781	0.47026	1	1	1.36054	1.544	0	0	0.947771	0.754665	0	0	1.14322	1.08834	0	0
29/10/2017	1.22207	0.908513	0	0	4.37747	2.37513	0	0	0.446178	0.780088	0	0	47.8074	62.6798	0	0	0.643454	1.35429	0	0	3.65508	5.61939	1	0	0.405406	0.458551	1	1	1.17545	1.52424	0	0	1.40481	0.781615	0	0	1.09654	1.11591	0	0
30/10/2017	1.04626	1.66568	0	0	4.16008	3.15785	0	0	0.453949	0.908385	0	0	51.1609	70.0411	0	0	0.617172	1.42893	0	0	3.87856	5.05112	0	0	0.442696	0.453884	1	1	1.17473	1.79497	0	0	1.37284	0.810669	0	0	1.12188	1.02947	0	0
31/10/2017	1.14543	1.77432	0	1	3.65209	3.07073	0	0	0.678454	0.64262	0	0	55.5382	60.0006	0	0	0.563869	1.10315	0	0	3.41759	3.43297	0	0	0.432578	0.443573	1	1	1.41885	2.39932	0	0	1.35927	0.946398	0	0	1.06885	1.0349	0	0
1/11/2017	1.12444	0.795516	0	1	3.46857	3.08008	0	0	0.405404	0.658962	0	0	29.5181	61.0539	0	0	1.00209	1.00153	0	0	3.35838	3.32776	0	0	0.431456	0.38064	1	1	1.55505	2.62153	0	0	1.06538	0.805306	0	1	1.06301	1.04257	0	0
2/11/2017	1.76111	0.432437	0	1	3.34586	3.07775	0	0	0.490666	0.69343	0	0	40.3994	64.8701	0	1	1.04971	0.96101	0	0	4.15435	3.46387	0	0	0.500758	0.439101	1	1	1.3072	2.08395	0	0	0.804946	0.920221	2	0	1.05349	1.05365	0	0
3/11/2017	1.11401	0.67481	0	0	2.795	3.34304	0	0	0.495177	0.64861	0	0	51.3466	60.0829	0	1	1.20859	1.03679	0	0	3.274	3.71193	0	0	0.502474	0.439918	1	1	1.37393	1.92149	0	0	0.901273	0.937179	0	0	0.961935	0.895818	0	0
4/11/2017	1.31519	2.39723	0	0	3.30718	4.09492	0	0	0.533712	0.675477	0	0	33.6372	77.2494	0	1	0.867153	1.00772	0	0	1.75219	3.64072	0	0	0.503318	0.450781	2	1	1.58443	1.87377	0	0	1.01896	1.03049	0	0	0.934362	0.972868	0	0
5/11/2017	1.33184	2.23841	0	0	3.3984	6.8424	0	0	0.463199	0.68824	0	0	39.8249	78.5175	0	1	1.17754	1.04996	0	0	3.09403	3.92674	1	0	0.50768	0.438723	2	1	1.6496	1.88881	0	0	1.2432	0.816697	0	1	1.12173	0.961766	0	0
6/11/2017	2.17535	0.466186	0	0	3.34194	4.16461	0	0	0.619893	0.831269	1	0	36.4661	60.6761	0	0	1.1359	0.721212	0	0	6.71447	3.84418	0	0	0.516348	0.432161	1	1	1.32961	1.78478	0	0	1.28884	0.762414	0	0	1.1175	1.01186	0	0
7/11/2017	2.3049	0.565402	0	1	5.21025	3.681	0	0	0.670568	0.777197	0	0	25.5359	54.1635	0	0	1.23357	0.982084	0	0	7.21392	3.75272	0	0	0.599064	0.433276	0	1	1.6699	1.73679	0	0	1.28793	0.874979	0	0	1.0177	1.05423	0	0
8/11/2017	3.01325	0.910233	0	0	5.72842	3.63359	0	0	0.698573	0.706522	1	1	54.9408	51.088	0	0	1.08736	1.04541	0	0	4.69539	3.75435	0	0	0.604704	0.420521	0	2	1.88217	1.81531	0	0	1.13316	0.909143	0	0	1.02034	1.22073	0	0
9/11/2017	2.19549	1.09426	1	2	4.46906	4.02395	1	0	0.862358	0.572344	0	0	49.7497	60.2271	0	0	1.1792	1.07347	0	0	4.74472	3.27761	0	1	0.559684	0.389055	0	1	1.53554	1.80998	0	0	1.07165	0.836271	0	1	1.03087	1.2683	0	0
10/11/2017	2.90887	1.40295	0	1	3.95112	3.88568	1	0	0.851995	0.472849	0	1	49.3286	71.8642	0	0	1.13893	0.936959	1	0	3.60702	3.44398	1	1	0.592262	0.673609	0	1	1.68728	1.69125	0	0	1.01524	0.808278	0	0	0.975113	1.38466	0	0
11/11/2017	2.57669	1.46821	0	0	4.1169	4.06711	1	0	0.865333	0.410813	1	1	51.8048	79.7646	0	0	1.84513	0.644325	0	0	4.20824	3.27402	0	0	0.620497	0.639755	0	1	1.45299	1.89557	0	0	0.939484	0.699738	0	0	0.975113	1.3779	0	0
12/11/2017	2.6154	2.35466	1	0	4.09643	4.08463	2	0	0.836232	0.755576	0	0	65.5025	65.915	0	0	1.7029	0.62992	1	0	4.80302	3.57447	0	0	0.625403	0.708431	0	1	1.56263	1.65911	0	0	0.930082	0.693686	0	0	0.95517	1.28366	0	0
13/11/2017	2.08727	1.15117	0	1	5.3181	4.06405	0	0	0.865507	0.786685	0	0	52.186	68.1083	0	0	1.24055	0.685042	0	0	7.39037	5.03795	1	0	0.657377	0.700956	0	1	1.50678	1.71646	0	0	0.788371	0.722903	0	0	0.982408	1.31551	0	0
14/11/2017	1.19694	1.1719	0	0	6.17378	4.61467	0	0	0.84442	0.736619	0	0	56.4994	66.6714	0	0	1.24629	0.711651	0	0	7.61798	4.8758	0	1	0.642034	0.694113	0	1	1.5441	1.74019	0	0	0.876189	0.81813	0	0	0.948821	1.20054	0	0
15/11/2017	1.60875	2.55295	0	0	5.78866	6.14002	0	0	1.14639	1.36498	1	0	65.4461	63.5534	0	0	1.34855	0.696418	0	0	7.66656	10.3571	0	0	0.653759	0.552311	0	0	1.44496	1.89952	0	0	1.31203	0.802391	0	1	0.970462	1.2114	0	0
16/11/2017	1.49431	2.57693	0	0	5.63177	7.92575	0	0	0.994549	1.21991	0	0	64.5605	72.8879	0	0	1.37313	0.886236	0	0	7.55101	9.21169	0	0	0.680975	0.544402	0	0	1.52375	2.04645	0	0	1.74939	0.90115	0	0	0.952487	1.11952	0	0
17/11/2017	1.56186	1.55885	0	0	5.19929	8.59827	0	0	1.08887	1.03858	1	0	46.1145	48.9627	0	0	1.13594	0.929444	0	0	3.74361	7.65214	0	0	0.67567	0.590017	0	0	1.63287	2.51253	0	0	1.89833	0.828302	0	0	0.922304	1.22853	0	0
18/11/2017	1.98713	2.12762	0	0	5.0543	5.88729	0	0	1.24339	0.780303	0	0	53.6146	69.0361	0	1	2.22198	0.95296	0	0	4.73747	5.66212	0	0	0.688371	0.573489	0	0	1.60131	2.53064	0	0	1.61512	1.01575	2	0	0.980588	1.17896	0	0
19/11/2017	1.79336	1.49526	0	0	8.47433	4.68688	0	0	4.14968	0.930886	0	0	56.1661	49.7138	0	0	2.53637	1.44023	0	0	5.85182	5.13552	0	0	0.689911	0.564979	0	0	1.69057	2.19946	0	0	1.30133	1.04339	1	0	1.0606	1.19123	0	0
20/11/2017	1.21766	1.42525	0	0	8.8883	4.41283	0	0	1.34265	0.906392	1	0	39.1101	38.232	0	0	2.39143	1.16654	0	1	5.49254	4.98457	1	0	0.741957	0.523669	0	0	1.58249	1.74468	0	0	1.04183	1.2654	1	0	1.14834	1.64505	0	0
21/11/2017	1.08701	2.24229	1	0	9.95611	4.96799	0	0	3.90471	1.65936	0	0	37.3433	45.9986	0	0	2.18433	1.26261	0	0	5.52543	4.7885	0	0	0.74125	0.591439	0	0	1.32539	1.49811	0	1	1.41532	1.09925	1	0	1.07818	1.22612	0	0
22/11/2017	1.12177	2.08377	0	0	9.80576	8.56231	0	0	3.87981	1.74474	0	0	33.961	41.4375	0	0	2.4907	1.09117	0	0	3.95626	7.59839	0	0	0.761334	0.567674	0	0	1.57939	1.93987	0	2	1.1517	1.33138	1	1	1.00188	1.33166	0	0
23/11/2017	1.39331	0.943424	1	0	10.7432	8.43129	0	0	3.72887	1.96405	0	0	51.5345	39.1325	0	0	2.16189	1.09495	0	0	5.97007	6.57981	0	0	1.00025	0.65753	0	0	1.84256	1.99089	0	1	1.33839	1.36462	1	0	0.968324	1.34009	0	0
24/11/2017	1.51452	1.32877	1	0	10.7598	8.16554	0	0	1.09045	1.70185	1	0	40.7209	56.9907	0	0	2.53849	1.05696	0	0	7.42205	7.93108	0	0	0.753058	0.66186	0	0	1.74481	1.67755	0	0	1.4263	1.44137	1	0	0.935932	1.23993	0	0
25/11/2017	1.71094	0.781328	0	0	11.3415	8.6013	0	0	0.767854	1.48357	2	1	45.0685	55.6536	0	0	2.32358	1.20018	0	0	11.6393	8.22902	0	0	0.740498	0.737978	0	0	1.9238	1.47891	0	0	1.16656	1.54312	1	0	0.929885	1.25148	0	0
26/11/2017	2.61262	1.52806	0	0	11.3944	8.94932	0	0	1.20851	1.34054	1	1	48.5277	83.0336	0	0	2.24845	1.01753	0	0	11.6253	9.10603	0	0	0.713986	0.705848	0	0	2.55496	1.51853	0	0	1.45243	1.16909	0	0	0.969427	1.22842	0	0
27/11/2017	2.70278	1.1101	0	0	12.3972	5.74638	0	0	1.33323	1.221	1	1	54.9501	49.5726	0	0	3.07402	1.1329	0	0	11.7398	5.6475	0	0	0.752233	0.664882	0	0	2.57819	1.8035	1	0	1.10172	1.21023	0	0	0.949729	1.27718	0	0
28/11/2017	2.33972	1.95127	0	0	7.93497	5.37182	0	0	1.58627	1.44844	0	1	38.5132	81.5537	0	0	2.73761	1.32338	0	0	14.1526	5.99183	0	0	0.754257	0.723531	0	0	1.76451	1.76729	1	0	1.06371	1.12094	0	1	1.00314	1.32889	0	0
29/11/2017	1.79803	0.663015	0	1	8.57678	5.34342	0	0	2.21814	1.33415	0	0	66.4683	53.3006	0	0	2.67642	1.38255	0	0	7.16108	11.4408	0	0	0.743039	0.668523	0	0	1.62188	1.68195	1	0	0.992545	1.17829	0	0	1.033	1.3206	0	0
30/11/2017	1.341	0.619968	0	1	8.87841	5.13503	0	0	2.6594	1.45194	0	0	71.7815	48.0343	0	0	2.34928	1.43527	0	0	6.77638	7.69003	0	0	0.744003	0.665432	0	0	1.6486	2.38847	1	0	1.24873	1.23416	1	0	1.04073	1.30643	0	0
1/12/2017	1.49321	1.01805	0	0	6.86129	5.57646	0	0	2.85009	1.35655	1	0	45.4184	89.0637	0	0	2.62535	1.50555	0	0	6.19627	9.41114	0	0	0.916298	0.668052	0	0	1.81352	1.15343	0	1	0.949789	2.06894	0	0	1.0671	1.31371	0	0
2/12/2017	1.16365	1.52386	0	0	5.74719	5.40387	0	0	3.09057	1.1606	0	0	46.0538	85.0516	0	0	2.33209	1.58384	0	0	3.9496	8.78168	0	1	0.900602	0.694319	0	0	1.66424	1.41958	0	0	0.951683	1.14054	0	0	1.1327	1.19398	0	0
3/12/2017	0.962084	3.67669	0	0	5.91808	5.68039	0	0	3.23977	0.906991	0	1	40.2713	83.8487	0	0	2.34295	1.69874	0	0	5.46962	9.47741	0	1	0.887044	0.700855	0	0	1.71928	2.65802	0	0	1.18098	1.22296	0	0	1.1554	1.25731	0	0
4/12/2017	1.15376	1.52397	0	0	5.76644	4.29767	0	0	3.26136	1.39462	0	1	28.5717	84.7549	1	0	2.17261	2.04191	0	0	5.69158	8.93983	0	1	0.910835	0.676279	0	0	1.63723	2.71298	0	0	1.06165	1.33402	0	0	1.05628	1.26143	0	0
5/12/2017	1.63851	1.13556	0	0	4.8672	5.43986	0	0	3.7217	1.46269	1	1	28.9683	81.6661	1	0	2.32451	2.24238	0	0	6.67707	8.73632	0	2	0.901716	0.633864	0	0	1.68495	2.91629	0	0	1.11835	1.42048	0	0	1.06473	1.28047	0	0
6/12/2017	1.85954	0.995488	0	0	4.50096	7.97628	0	0	4.10425	2.38656	0	0	37.2481	77.1272	0	0	2.20956	1.85505	0	0	3.87375	8.35261	1	2	0.894772	0.609284	0	0	1.56785	2.49666	0	0	1.22008	1.38188	0	0	1.07573	1.22433	0	0
7/12/2017	1.56423	1.06485	0	0	6.83652	7.65723	0	0	3.51852	2.2946	0	0	34.0154	76.3525	1	0	3.00033	1.91851	0	0	3.99784	8.24594	0	0	0.932649	0.668446	0	0	1.81808	2.57975	0	0	1.22884	1.20262	0	0	1.07975	1.28753	0	0
8/12/2017	1.70295	1.16083	0	0	6.65626	7.63747	0	0	3.26247	1.59716	0	0	34.7987	69.739	0	0	2.86745	1.82939	0	0	3.91093	8.1324	0	0	0.932314	0.675451	0	0	2.00658	2.29899	0	0	1.09651	1.24202	0	1	1.12909	1.1517	0	0
9/12/2017	1.49611	1.07883	0	0	6.7075	7.376	0	0	3.12799	1.93096	0	0	29.4879	80.5669	1	0	2.96371	1.99587	0	0	3.32987	7.8767	1	0	0.929177	0.669159	0	0	1.44295	2.32594	0	0	0.747176	1.19731	1	0	1.15587	1.14124	0	0
10/12/2017	1.58415	1.06199	0	0	6.45732	7.2896	0	0	3.30364	1.82936	0	0	32.3761	55.9667	1	0	3.06922	2.05495	0	0	3.48597	7.24872	1	0	0.909841	0.634623	0	0	1.70804	2.35454	0	0	0.843728	1.23985	0	1	1.03697	1.16002	0	0
11/12/2017	1.56782	1.27573	0	0	7.77755	6.98151	0	0	3.21831	3.05317	0	0	28.1333	59.7536	1	1	2.90653	3.00231	0	0	4.40226	8.08932	0	0	0.895063	0.663505	0	0	1.97091	2.29336	0	0	0.90705	1.294	0	0	1.03958	1.06579	0	0
12/12/2017	1.41047	1.18565	0	0	4.85702	7.04394	2	0	3.06035	2.91739	0	0	31.3023	45.2286	2	1	3.14727	2.71719	0	0	4.14205	6.90411	0	0	0.705213	0.69289	0	0	2.0389	2.10724	0	0	0.951215	1.43974	0	0	1.01806	0.998471	0	0
13/12/2017	2.43956	1.08458	0	0	4.77349	7.44479	1	0	2.80327	2.70479	0	0	43.1991	46.6015	2	0	2.53367	2.75664	0	0	6.46574	7.37132	0	2	0.698588	0.701014	0	0	2.13677	1.94671	0	0	0.734218	1.16796	1	0	1.1408	1.13193	0	0
14/12/2017	1.37079	1.28397	0	0	4.70197	6.17895	1	0	2.3669	1.30553	1	0	32.2493	54.8671	2	0	2.50535	2.21411	0	0	6.87982	6.31164	1	2	0.691319	0.686704	0	0	3.34531	2.07946	0	0	1.00615	1.09666	1	0	1.1328	1.14017	0	0
15/12/2017	0.979569	1.24778	0	0	4.72074	5.79742	2	0	2.55009	0.838228	0	0	30.4575	49.3226	2	0	2.74837	2.67825	0	0	7.64447	7.32543	0	1	0.749331	0.640371	0	0	2.34685	2.23764	0	0	1.06771	1.09606	0	0	1.137	1.37803	0	0
16/12/2017	1.0263	1.6573	0	0	5.3739	4.7969	3	0	2.42886	0.958218	0	0	40.146	46.1393	1	0	3.09362	2.65077	0	0	14.6352	7.29195	0	1	0.754295	0.636648	0	0	2.39679	2.07499	0	0	1.00749	1.13814	0	0	1.04275	1.42695	0	0
17/12/2017	1.36328	1.81404	0	0	5.6874	5.51233	1	0	1.44331	1.15883	0	0	38.8916	46.3842	1	0	3.20696	2.67796	0	0	7.46385	7.62522	0	0	0.758849	0.666289	0	0	2.2188	2.03967	0	0	1.0761	1.0311	0	0	1.01837	1.21727	0	0
18/12/2017	0.957054	2.60395	0	0	4.03359	5.84947	0	0	2.77607	1.82031	0	0	33.3659	78.1624	1	0	3.14866	2.78164	0	0	10.675	10.2585	0	0	0.756618	0.651866	0	0	2.22679	2.13407	0	0	1.17673	1.00212	0	0	1.0359	1.20892	0	0
19/12/2017	0.979222	1.34621	0	0	4.98498	6.22203	0	0	2.05285	2.14062	0	0	32.6008	38.8373	1	0	2.9067	2.7794	0	0	7.82092	10.8294	0	0	0.753685	0.647587	0	0	1.86643	2.11357	0	0	1.1952	1.26111	0	0	1.01226	1.23276	0	0
20/12/2017	1.66076	3.82331	0	0	6.00063	6.19721	0	0	3.1969	1.96502	0	0	36.389	62.9685	1	0	2.83712	2.87493	0	0	5.38389	11.49	0	0	0.715441	0.698027	0	0	1.5573	2.07517	0	0	0.873447	1.09346	1	0	1.01641	1.21256	0	0
21/12/2017	0.948056	1.7706	0	0	6.49727	6.02495	0	0	2.93414	2.17084	1	0	35.1994	38.6289	0	0	2.77355	2.91802	0	0	4.02417	12.4362	0	0	0.705556	0.695254	0	0	1.50076	1.61223	0	0	0.970145	1.01343	1	0	1.07191	1.24157	0	0
22/12/2017	3.95449	2.08059	0	0	6.92532	5.68798	0	0	2.85799	2.66437	0	0	34.5662	37.7633	0	0	2.66289	2.78771	0	0	4.51591	8.00416	0	0	0.69595	0.717968	0	0	1.66559	2.1309	0	0	1.00741	0.951986	1	0	1.10152	1.30645	0	0
23/12/2017	1.77653	2.13358	0	0	4.13891	5.62775	0	0	1.90255	1.83977	0	0	37.8573	39.7321	0	0	2.57152	2.97966	1	0	5.9356	6.88866	0	0	0.688849	0.718158	0	0	1.13768	1.53978	0	0	0.777615	0.83331	1	0	1.15873	1.30711	0	0
24/12/2017	1.32535	2.1897	0	0	4.70354	3.38949	0	0	1.36369	1.87824	1	0	36.6709	53.8616	0	0	2.50637	2.84619	0	0	3.98967	11.2938	0	0	0.722958	0.738996	0	0	1.13229	1.48605	0	0	0.872589	0.840574	1	0	1.17284	1.2332	0	0
25/12/2017	1.26809	1.82389	0	0	5.52901	3.294	1	0	1.63964	2.22367	2	0	34.9834	63.8006	0	0	2.40745	2.7642	0	0	5.9855	10.4473	1	0	0.680197	0.738753	0	0	1.12312	1.35884	0	0	0.810154	0.66702	1	1	1.10946	1.22192	0	0
26/12/2017	1.632	2.71454	0	0	4.72312	4.2388	1	0	1.65285	1.9675	1	0	43.2945	64.103	0	0	2.60647	3.17741	0	0	7.64484	12.1205	0	0	0.681958	0.747687	0	0	1.48344	1.46414	0	0	0.661132	0.711965	0	1	1.15973	1.17226	0	0
27/12/2017	1.46095	1.47303	0	0	5.27377	4.72026	0	0	1.47677	1.84078	1	1	40.1197	45.2711	0	0	2.62219	3.6271	0	0	6.56209	12.7461	1	0	0.697005	0.758009	0	0	1.49574	1.60414	0	0	0.639248	0.62661	0	1	1.12608	1.26038	0	0
28/12/2017	1.56671	0.95385	0	0	4.69388	6.51413	0	0	1.38946	1.58608	1	1	39.677	40.1836	0	0	2.88234	3.48476	0	0	4.60901	6.72442	0	0	0.703933	0.769757	0	0	1.51915	1.5552	0	0	0.596021	0.818575	0	0	1.19406	1.19893	0	0
29/12/2017	2.55342	1.39233	0	0	5.19816	6.56063	0	0	1.19616	1.65707	1	0	54.0813	41.3776	0	0	2.75027	3.28184	0	0	4.81578	6.80434	0	1	0.749493	0.779095	0	0	1.51198	1.41846	0	0	0.64319	0.82335	0	0	1.07341	1.16098	0	0
30/12/2017	3.03791	1.25028	0	0	3.92964	5.29337	0	0	1.39357	2.12912	0	0	37.7523	52.4762	0	0	2.89706	3.17742	0	0	11.2382	10.4349	0	0	0.751829	0.774566	0	0	2.19279	1.277	0	0	0.919375	0.775263	0	0	1.04327	1.20588	0	0
31/12/2017	2.31422	1.27517	0	0	6.20512	5.96207	0	0	1.39453	1.75562	1	0	33.607	50.2033	0	0	3.26762	3.14077	0	0	7.58118	9.07993	0	1	0.763085	0.774655	0	0	2.40289	1.3209	0	0	0.924319	0.861413	0	1	1.0488	1.23352	0	0
1/1/2018	1.32493	1.23931	1	0	9.51993	5.55822	1	0	1.8317	1.66794	0	1	28.3425	44.2987	0	0	3.41685	3.58952	0	0	7.55962	6.71629	0	1	0.749063	0.782951	0	0	2.92398	1.41857	0	0	1.14264	0.728871	1	0	1.08407	1.26801	0	0
2/1/2018	1.83868	1.15086	0	0	8.31253	6.65878	0	0	2.42506	1.32896	0	1	34.8067	35.8074	1	1	3.5936	3.23552	0	0	7.61048	4.63267	0	2	0.766811	0.773056	0	0	2.04605	1.44365	1	0	1.6548	0.782355	0	0	1.10364	1.26751	0	0
3/1/2018	1.50148	1.01585	1	0	4.50206	6.46951	2	0	2.81863	1.91354	0	0	35.713	44.4418	1	0	3.67819	3.71622	0	0	7.2513	3.86411	0	2	0.783161	0.772257	0	0	2.27728	1.60181	1	0	1.761	0.689339	0	0	1.14138	1.09091	0	0
4/1/2018	2.19721	1.21937	0	0	4.95501	5.8644	0	0	2.39229	1.87545	0	0	36.5704	36.1658	0	0	3.66007	3.44506	0	0	8.22531	3.76352	0	1	0.802875	0.762956	0	0	2.01513	1.73351	0	0	1.6541	0.852264	0	0	1.0819	1.12092	0	0
5/1/2018	2.04419	1.11027	0	0	5.11909	5.50031	0	0	2.37115	1.30286	0	1	33.7899	34.6518	0	0	3.89657	3.19619	0	0	7.53108	5.55162	0	0	0.816313	0.763588	0	0	1.14951	1.7214	0	0	1.25488	0.91011	0	0	1.30706	1.33027	0	0
6/1/2018	2.94978	0.9578	1	0	5.00918	4.99119	0	0	3.26332	1.43244	0	1	39.7167	31.4679	1	0	4.11808	3.90646	0	0	7.19308	5.15234	0	1	0.871416	0.825878	0	0	1.12231	2.05366	1	0	1.37528	0.880285	0	0	1.5911	1.22278	0	0
7/1/2018	5.11097	0.936117	1	0	5.03475	3.73224	0	0	3.5654	2.15335	0	0	41.2814	29.4985	0	0	4.75289	3.40478	0	0	7.75063	5.27122	0	2	0.876674	0.827337	0	0	1.23191	2.19685	0	0	2.05465	0.94	0	0	1.56758	1.21067	0	0
8/1/2018	3.75982	0.902538	0	0	7.05359	4.2744	1	0	3.77807	2.41202	0	0	31.8938	35.0295	0	0	4.12511	3.55786	0	0	8.85221	8.71996	0	1	0.893642	0.82641	0	0	1.36429	2.08407	0	0	2.06905	1.00927	0	0	1.62746	1.19649	0	0
9/1/2018	1.42814	0.929973	1	0	9.98502	6.26416	0	0	3.5436	1.71372	0	1	28.3599	31.9851	0	0	4.77265	4.0407	0	0	6.01035	6.09427	0	1	0.906238	0.821675	0	0	1.46154	2.15026	0	0	1.08858	0.932482	1	0	1.56525	1.17042	0	0
10/1/2018	1.39568	1.48333	0	0	10.5962	5.35221	0	0	3.81672	1.27799	0	1	29.3302	32.5264	0	0	4.43293	3.83322	0	1	6.66175	6.38199	0	0	0.900289	0.828798	0	0	1.42657	2.30553	0	0	1.21055	1.00153	0	0	1.5779	1.16742	0	0
11/1/2018	0.897276	1.42559	2	0	10.6528	5.68551	0	0	3.61695	1.88875	0	1	29.2069	32.5105	0	0	4.64116	3.98652	0	0	5.70278	7.87871	0	0	0.895528	0.84136	0	0	1.36602	2.32884	0	0	0.866502	1.05843	1	0	1.55956	1.05684	0	0
12/1/2018	1.06923	1.33973	0	0	9.89663	5.28405	0	0	3.80803	1.71783	0	1	30.026	28.747	0	0	4.05967	3.66008	0	0	6.71637	5.64523	0	0	0.89788	0.844679	0	0	1.33992	2.56007	0	0	0.600001	1.05847	2	0	1.3287	1.10383	0	0
13/1/2018	1.23293	1.21785	1	0	9.88216	3.69921	0	0	4.3332	1.20873	0	0	29.9772	19.5177	0	0	3.93172	3.61399	0	0	5.9054	5.10089	0	0	0.891927	0.846604	0	0	1.52562	2.74368	0	0	0.642688	0.859675	2	0	1.32351	1.11159	0	0
14/1/2018	1.55593	1.29538	0	0	9.44583	3.60277	0	0	3.54833	0.909024	0	2	38.1103	17.7127	0	0	4.08235	3.64443	0	0	6.01243	5.13358	0	0	0.896784	0.846823	0	0	1.50232	2.75066	0	0	1.65818	0.757852	0	0	1.28358	1.10063	0	0
15/1/2018	1.44997	1.3837	1	0	9.17523	3.72757	0	0	3.15494	1.61616	0	1	34.4854	31.2802	0	0	4.13046	3.57703	0	0	8.66383	4.3149	0	0	0.884923	0.851646	0	0	1.62077	1.99516	0	0	2.54276	1.14437	0	1	1.29041	1.06033	0	0
16/1/2018	1.78312	1.76502	0	0	8.89221	3.38636	0	1	1.83909	2.19464	0	1	32.9717	33.0029	1	0	4.10585	3.83572	0	0	9.38654	5.34926	0	0	0.916464	0.857298	0	0	1.42952	1.71904	0	0	2.46179	0.619584	0	0	1.28143	1.03167	0	0
17/1/2018	1.77684	1.40583	0	0	8.63258	2.88412	0	1	0.985338	2.22503	0	1	42.6468	26.3795	1	0	4.33287	3.96967	0	0	8.77434	5.33874	0	0	0.926272	0.860345	0	0	1.49802	1.71009	0	0	2.70147	1.13855	0	0	1.29464	1.01316	0	0
18/1/2018	2.38022	1.31333	0	1	9.5763	3.66035	0	0	3.94173	2.16485	0	1	40.8137	22.7812	1	0	4.92073	4.04106	0	0	8.45257	5.78988	0	0	0.934583	0.870289	0	0	1.53271	1.76366	0	0	2.49503	1.1613	1	0	1.29709	1.1228	0	0
19/1/2018	1.94587	1.1176	0	1	8.69808	3.07514	0	0	3.58203	1.82169	0	2	40.6183	22.0733	1	0	5.31328	4.02775	0	0	8.02636	7.70341	0	0	0.933186	0.865549	0	0	1.71233	2.30621	0	0	2.31593	1.09824	1	0	1.30247	1.02051	0	0
20/1/2018	2.69468	1.17349	0	1	9.32924	3.40756	0	1	3.67707	1.63702	1	3	46.5281	25.7866	1	0	5.68689	4.00589	0	0	8.87451	9.08209	0	0	0.929176	0.859611	0	0	1.90627	1.99566	0	0	1.24601	1.08932	1	1	1.29839	1.08181	0	0
21/1/2018	3.05134	1.11341	0	1	9.30158	3.32382	0	1	5.08248	1.45557	0	3	38.0148	25.3922	1	0	5.93292	3.70931	0	0	10.8209	9.19326	0	0	0.952713	0.856751	0	0	1.98684	1.91063	0	0	2.50473	1.14223	0	0	1.32694	0.973823	0	0
22/1/2018	1.61452	1.05455	0	2	8.79427	3.49137	1	0	5.68978	1.47731	0	2	36.5443	26.0469	1	0	5.58722	4.0565	0	0	9.4914	9.40076	0	0	0.955017	0.857455	0	0	2.30974	1.82006	0	0	2.84509	1.14987	0	1	1.32939	1.01412	0	0
23/1/2018	1.85571	1.34787	0	1	8.7544	3.69214	0	0	2.70069	1.73798	0	1	34.0924	24.583	1	0	6.03791	4.08061	0	1	9.54386	11.4389	0	0	0.956011	0.841053	0	0	2.42142	1.81871	0	0	3.09964	1.09377	0	0	1.35738	1.06138	0	0
24/1/2018	2.27654	1.25442	0	0	9.12598	4.95546	0	0	3.5661	2.67248	0	0	39.3314	23.0793	0	0	6.3456	4.12281	0	0	9.18173	11.4575	1	0	0.96967	0.839909	0	0	2.4151	2.28365	0	0	3.17083	1.09687	0	0	1.24603	1.07021	0	0
25/1/2018	2.17947	1.25731	0	0	6.65688	5.16239	1	0	3.87749	2.60208	0	0	32.5635	25.2033	1	0	5.56758	4.48727	0	0	8.75268	9.67984	1	0	0.957283	0.836673	0	0	2.57141	2.45528	0	0	3.59355	1.61987	0	0	1.29221	1.00675	0	0
26/1/2018	2.48591	1.2203	0	0	6.83415	4.73998	0	0	6.90049	3.36061	0	1	33.5217	26.5181	1	0	5.74803	4.04172	0	0	8.50477	9.23925	1	0	0.939101	0.837534	0	0	1.64022	2.33402	1	0	1.66174	0.748449	0	0	1.34011	1.06269	0	0
27/1/2018	2.03816	1.27922	0	0	9.26437	5.50739	0	2	3.72439	3.75751	0	0	34.3578	29.9714	0	1	5.14936	4.2916	1	0	9.20362	10.0812	0	0	0.936985	0.842343	0	0	2.83762	2.36997	1	0	1.7163	0.834168	0	1	1.27451	1.08283	0	0
28/1/2018	2.21825	1.38527	0	0	6.66987	5.95124	0	2	2.59254	3.79433	0	0	56.1073	29.3703	0	1	5.24576	4.21582	0	0	8.50414	10.4255	0	0	0.941647	0.85149	0	0	3.36014	2.24282	0	0	1.78253	0.877509	0	0	1.195	1.09722	0	0
29/1/2018	3.35887	0.955371	0	0	7.0858	5.47536	0	1	2.07142	3.84692	1	0	44.1126	29.1955	0	0	5.5312	3.9051	0	0	12.1612	10.9614	0	0	0.9392	0.853391	0	0	2.72818	2.66486	1	0	1.87758	0.893144	0	0	1.20904	1.08811	0	0
30/1/2018	3.10168	1.2917	0	0	6.53354	7.12784	1	0	1.52842	3.80713	0	0	43.5121	43.4272	0	0	6.29011	4.07268	0	0	13.5919	12.1883	0	0	0.930985	0.848315	0	0	2.90944	2.14306	1	0	1.95109	1.2708	0	0	1.23726	1.16211	0	0
31/1/2018	1.70603	1.02188	0	1	6.18059	7.29978	1	0	1.76138	4.15256	0	0	39.6482	35.3438	0	1	6.44154	4.13559	0	0	19.5752	7.69036	0	0	0.932579	0.841067	0	0	2.25376	1.98243	0	0	1.68203	0.913835	0	0	1.25945	1.16906	0	0
1/2/2018	1.65109	0.935958	0	1	9.2394	6.06936	0	1	2.43838	4.62976	1	0	33.8567	34.2426	2	1	6.55628	4.04248	0	0	14.2042	7.09588	0	0	0.92421	0.847045	0	0	1.98509	2.14583	0	0	1.34005	0.927683	0	0	1.25753	1.20895	0	0
2/2/2018	1.57519	0.841532	0	0	8.32705	5.27847	0	0	1.8093	4.75326	1	0	32.7259	35.6085	1	0	5.86531	3.85965	0	0	11.2815	4.65447	0	1	0.932578	0.868468	0	0	2.12751	2.65498	0	0	1.83087	1.10996	0	0	1.33741	1.24914	0	0
3/2/2018	1.55467	0.810169	0	1	5.35872	5.58018	0	0	1.99619	4.65232	0	0	38.1491	34.7451	1	0	5.98604	4.07502	0	0	10.3835	4.33197	0	0	0.929615	0.871719	0	0	1.84704	2.20634	0	0	1.55101	1.25668	0	0	1.35547	1.25198	0	0
4/2/2018	1.68094	1.09512	0	1	6.05569	4.53815	0	0	1.96995	4.50412	1	0	36.1987	32.968	2	0	6.51338	4.13717	0	0	6.8327	7.12381	0	0	0.951918	0.909555	0	0	1.88288	2.22777	0	0	1.39717	2.06637	0	0	1.38421	1.2483	0	0
5/2/2018	1.17111	0.898801	0	2	7.58501	4.51598	0	0	2.33243	4.31956	0	0	24.5504	36.2718	2	1	5.45611	4.42483	0	0	7.21458	6.0587	0	0	0.950169	0.909123	0	0	2.83015	2.45567	0	0	1.44179	1.75665	0	0	1.38036	1.15537	0	0
6/2/2018	1.33308	2.61205	0	1	8.0888	6.85122	0	0	2.72545	4.56298	0	0	19.8775	35.0498	3	2	5.12803	4.90754	0	0	5.1748	7.87178	0	0	0.962653	0.930507	0	0	2.7449	1.6862	0	0	1.27851	2.09932	0	0	1.36799	1.18197	0	0
7/2/2018	1.76139	2.52549	0	2	9.31611	5.24155	0	0	2.5477	5.56607	1	0	22.6024	29.7734	2	1	5.54979	5.14819	1	0	9.70868	9.00794	0	0	0.954279	0.944348	0	0	1.92527	1.83818	0	0	1.24815	2.09366	0	0	1.42799	1.14874	0	0
8/2/2018	2.46728	0.78467	0	2	9.03701	5.45175	0	0	3.7086	5.26722	0	0	42.726	25.3099	1	1	5.52806	4.81898	0	0	10.4715	11.4354	1	0	0.965359	0.957294	0	0	1.86878	1.84153	0	0	1.43984	2.11102	0	0	1.30894	1.15831	0	0
9/2/2018	3.03012	1.1752	0	0	8.19039	5.84955	0	0	3.62373	4.9684	0	0	32.6994	18.1559	1	0	6.06608	4.87735	0	0	10.9426	11.158	2	0	0.987593	0.95807	0	0	2.10781	1.81773	0	0	1.83869	2.06988	0	0	1.66505	1.22029	0	0
10/2/2018	1.91418	1.15781	0	0	8.63498	7.00883	0	0	4.11565	5.27816	0	0	22.7577	25.3962	3	0	6.29226	5.18377	0	0	11.2491	10.6418	2	0	1.00695	0.957627	0	0	2.8323	1.58379	0	0	1.74725	1.92511	0	0	1.7975	1.16967	0	0
11/2/2018	1.4739	0.801813	0	0	9.2182	6.52644	0	0	4.40843	5.1844	0	0	22.6528	31.3073	2	0	5.99222	5.03846	0	0	10.2484	8.81253	1	0	1.00784	0.959253	0	0	2.00122	1.74228	0	0	1.66668	1.29115	0	0	1.526	1.26561	0	0
12/2/2018	2.35755	1.11906	0	0	8.49145	6.45387	0	0	3.87671	5.48705	0	0	26.0423	39.2273	2	0	6.6153	5.13148	0	0	10.5579	11.0676	1	0	1.00963	0.970153	0	0	1.70866	1.86909	0	0	1.59266	1.19739	0	0	1.38156	1.27764	0	0
13/2/2018	1.95708	1.62253	0	0	8.78678	5.51643	0	0	3.06623	5.63141	0	0	33.9977	39.5666	2	0	6.35208	5.10565	0	0	10.2921	11.8414	0	0	1.03495	0.972577	0	0	1.70542	1.91525	0	0	1.17875	0.927433	0	0	1.23515	1.21825	0	0
14/2/2018	1.58304	1.03423	0	0	11.0731	5.21519	0	0	3.00135	4.86866	0	0	28.3702	29.7232	1	0	5.80273	4.90011	0	0	11.399	10.7206	0	0	1.03842	0.98217	0	0	1.69829	1.69494	0	0	0.865469	0.962889	1	0	1.22611	1.19994	0	0
15/2/2018	1.36139	1.7606	0	1	7.39265	5.83075	0	0	3.11379	4.77132	0	1	22.2701	35.2229	1	0	6.01482	4.71592	0	0	10.8036	9.30124	1	0	1.03226	0.995154	0	0	1.69222	1.7629	0	0	0.906601	0.822747	0	0	1.21462	1.2619	0	0
16/2/2018	1.96178	2.39337	0	0	6.05185	6.06717	0	0	3.41425	4.55377	0	0	26.1444	34.1053	1	1	6.75741	5.0282	0	0	9.70861	8.71939	0	1	1.02936	0.999274	0	0	1.96427	1.8488	0	0	0.869177	0.724524	0	0	1.22374	1.30885	0	0
17/2/2018	2.42204	1.69236	0	0	5.9692	5.701	0	0	3.20436	4.23478	0	0	35.9266	27.404	1	1	6.53954	5.04345	0	0	6.19843	10.2466	1	0	1.03552	1.00621	0	0	1.66898	1.82076	0	0	0.996245	0.711137	0	0	1.25479	1.27031	0	0
18/2/2018	1.74618	1.82963	0	0	5.61081	6.08098	0	0	2.89669	4.24266	0	0	28.6982	28.4492	1	0	5.9955	4.7548	0	0	7.40538	15.9321	1	0	1.03768	1.0184	0	0	1.70998	2.38298	0	0	0.820904	0.857795	0	0	1.31497	1.24334	0	0
19/2/2018	1.65797	1.7361	0	0	4.76387	5.79485	0	0	2.16115	4.15932	0	0	27.344	23.107	1	0	5.50326	4.58514	0	0	9.42893	13.0879	0	0	1.0414	1.03217	0	0	1.69214	1.84042	0	0	0.884272	0.869972	0	1	1.2603	1.2421	0	0
20/2/2018	3.42769	1.93088	0	0	5.68062	3.75397	0	0	2.36185	4.52616	0	0	36.122	23.263	0	1	5.458	5.25645	0	0	8.86344	10.581	0	0	0.99491	1.05994	0	0	1.6054	2.19665	0	0	0.885527	0.918899	0	0	1.17633	1.08244	0	0
21/2/2018	1.75943	1.67794	0	0	5.75489	3.45241	0	0	2.28854	4.23722	0	0	32.2056	18.8828	0	0	5.39969	5.16308	0	0	4.26333	8.2422	0	0	0.993336	1.06405	0	0	1.65192	2.31822	0	0	1.10369	1.1653	0	0	1.16076	1.03158	0	0
22/2/2018	1.60189	3.42984	0	0	5.2265	3.01534	0	1	2.20655	4.53306	0	0	29.9598	18.3322	1	0	5.1162	5.18555	0	0	3.52383	8.52032	2	0	0.984063	1.06669	0	0	1.57855	2.21821	0	0	1.07694	1.04299	0	0	1.16177	1.07526	0	1
23/2/2018	1.63096	1.23443	1	0	4.89664	3.04689	0	1	2.63174	4.45208	0	0	21.1535	15.8912	0	4	4.82558	4.99703	0	0	3.60095	7.45151	2	0	1.01253	1.05229	0	0	1.54617	2.08295	0	0	1.16514	1.17777	0	0	1.1361	1.23239	0	0
24/2/2018	1.53429	2.18296	1	0	6.09168	4.43265	0	0	2.30166	4.17734	0	0	21.8645	24.9772	0	0	4.74292	6.46113	0	0	6.54493	13.9578	0	0	1.02061	1.042	0	0	1.40803	1.96114	0	0	0.880014	1.03524	0	0	1.10472	1.25847	0	0
25/2/2018	2.08666	2.21309	0	0	5.85237	6.90141	0	0	2.18325	3.7127	1	1	29.2518	20.9445	0	1	5.41614	6.2683	0	0	5.52389	16.1333	0	0	1.01033	1.034	0	0	1.40009	2.4915	0	0	0.889426	0.968467	0	0	1.07704	1.14984	0	0
26/2/2018	1.9545	1.50876	0	0	4.50012	5.73528	0	0	2.01402	3.59256	0	0	26.328	21.3328	0	0	5.20672	6.9139	0	0	4.63947	17.3978	0	0	1.01182	1.02151	0	0	1.62541	2.17121	0	0	1.00206	1.20054	0	0	1.08543	1.16143	0	0
27/2/2018	2.03367	1.63692	0	0	6.85442	6.82083	0	0	2.26164	2.89519	0	0	21.5292	22.4827	1	2	5.98864	6.75088	0	0	4.56078	16.3115	0	0	1.01841	1.02107	0	0	1.71571	2.46596	0	0	0.852188	1.57074	0	0	1.06376	1.22038	0	0
28/2/2018	1.76617	2.12154	0	0	6.60263	6.6383	0	0	1.99743	3.31635	0	0	19.0802	22.4264	0	1	6.15127	7.2262	0	0	5.52858	15.9634	0	0	1.04322	1.03967	0	0	1.541	1.99235	0	0	0.822949	1.41161	0	0	1.03624	1.2517	0	0
1/3/2018	2.62667	1.67162	0	0	4.75749	7.60889	0	0	1.65128	2.85076	0	0	19.8461	17.8676	0	0	5.90272	7.33361	0	0	5.47944	10.5961	0	0	1.0296	1.04214	0	0	1.42128	3.08428	0	0	0.84691	0.858392	0	0	1.03915	1.21045	0	0
2/3/2018	2.32064	1.44627	0	0	4.51242	7.44213	0	0	1.91575	2.75752	0	0	19.9954	20.2913	0	1	5.76659	6.44043	0	0	5.42344	9.09925	1	1	1.02759	1.03304	0	0	1.35745	2.46736	1	0	0.743326	1.00663	0	0	1.08601	1.42964	0	0
3/3/2018	2.26001	2.83731	0	0	3.30615	7.34155	0	0	1.93767	2.83531	0	0	18.8459	21.6816	0	2	6.15793	6.42813	0	0	3.5779	7.31955	1	0	0.995408	1.06053	0	0	1.62287	2.07087	0	0	0.772147	0.984309	0	0	1.00954	1.36774	0	0
4/3/2018	2.54804	1.65098	0	0	5.08576	8.30845	0	0	2.26758	3.6349	1	0	20.0191	17.0512	0	1	5.92585	6.44157	0	0	3.44308	6.93116	0	0	0.994297	1.04963	0	0	1.51892	2.13711	0	0	0.751344	1.10932	0	0	1.05247	1.3143	0	0
5/3/2018	2.56684	1.64444	0	0	5.44887	5.92531	0	0	2.21481	3.77471	0	0	21.0335	20.0314	0	1	5.94297	6.51874	0	0	3.89141	7.3857	1	0	0.975084	1.04855	0	0	1.67907	2.13971	0	0	0.809018	1.30825	0	0	1.03902	1.34932	0	0
6/3/2018	2.56422	1.89404	0	0	5.24245	5.7558	1	0	1.75815	3.90313	1	0	21.7964	31.478	0	1	6.35419	6.76626	0	0	5.26407	5.72858	0	0	0.955692	1.02103	0	0	1.75269	1.85287	0	0	0.80783	1.0099	0	0	1.0213	1.36191	0	0
7/3/2018	2.22925	1.82665	0	1	3.79711	5.79623	1	0	1.92325	4.23954	1	0	20.7916	24.9913	0	0	6.18856	6.3259	0	0	3.48726	6.00147	1	0	0.947119	1.02579	0	0	1.43095	1.84525	0	0	0.91652	1.21225	0	0	0.94776	1.39894	0	0
8/3/2018	2.35551	1.71988	0	0	3.82567	5.15815	1	0	1.71449	4.69194	1	0	19.7614	26.4513	0	0	6.44671	6.39549	0	0	4.02674	6.41634	0	0	0.964457	1.01816	0	0	1.44063	1.16646	0	1	0.936127	1.00392	0	0	0.992493	1.39811	0	0
9/3/2018	2.18331	1.5902	0	0	3.68179	5.02449	0	0	2.03234	4.24511	1	0	19.8322	28.6021	0	0	6.15618	6.08906	0	0	10.6627	7.99347	1	0	0.921284	1.00264	0	0	1.56096	1.21252	0	1	0.949727	1.20869	0	0	0.982623	1.14817	0	0
10/3/2018	2.8908	1.70507	0	0	3.36742	5.51098	0	1	2.45482	3.75425	0	1	28.9914	28.2326	0	0	6.39338	5.83283	0	0	12.53	6.10644	0	0	0.910109	1.00161	0	0	1.66151	1.01045	0	1	1.10781	1.11153	0	0	0.979055	1.07968	0	0
11/3/2018	2.06116	1.70929	0	0	3.73089	5.30575	0	0	3.04033	3.18401	0	0	29.9257	27.973	0	0	5.91038	6.31637	0	0	12.1769	7.08841	0	0	0.883065	0.990807	0	0	2.09742	1.31714	0	0	1.12904	1.19378	0	0	0.970415	1.08082	0	0
12/3/2018	1.54765	1.58059	0	0	4.73795	5.47726	0	1	2.53375	2.41446	0	1	25.1691	32.7107	1	0	6.19932	6.29563	0	0	4.26533	6.57472	0	0	0.856015	0.979667	0	0	2.06679	1.50292	0	0	1.27918	0.914879	0	0	1.07028	1.06373	0	0
13/3/2018	1.44061	1.34787	1	0	4.78048	5.23762	0	0	2.30342	2.22786	0	1	22.7052	24.4367	1	0	6.31281	6.13676	0	0	4.22371	5.61719	0	0	0.868278	0.992685	0	0	1.86029	1.39434	0	0	1.27423	0.934566	0	0	1.06278	1.05174	0	0
14/3/2018	3.81205	2.41162	0	0	6.45648	4.83958	0	0	2.46155	2.27618	0	0	18.2713	44.7395	1	0	6.30198	4.8809	0	0	4.50124	5.87469	0	0	0.884481	0.993865	0	0	2.2403	1.50687	0	0	1.30131	0.892194	0	0	1.07974	0.997251	0	0
15/3/2018	2.24071	2.48796	0	0	5.81435	4.31711	0	2	2.29741	3.00733	0	0	13.8596	18.4956	1	0	6.55819	4.79508	0	0	3.13579	6.99256	0	0	0.884766	0.983708	0	0	1.87788	1.72407	0	0	1.16626	1.02216	0	0	1.08795	1.1032	0	0
16/3/2018	1.68052	4.65637	0	0	5.62465	5.05881	0	1	1.90297	3.28646	0	0	16.9251	13.2245	0	1	6.4834	5.49834	0	0	3.68396	5.87477	0	0	0.884784	0.98216	0	0	2.00839	1.63148	0	0	1.19381	0.963401	0	0	1.10648	1.11258	0	0
17/3/2018	1.4252	4.54852	0	0	6.007	4.83941	1	0	2.1607	2.80705	0	0	13.5783	13.1667	0	1	5.82293	5.3563	0	0	2.97897	9.06683	0	0	0.868021	0.983052	0	0	1.96108	1.5408	0	0	0.747451	1.13809	0	0	1.20945	1.11945	0	0
18/3/2018	2.03114	2.92837	0	0	5.68137	3.8915	1	1	2.15531	3.36421	0	0	21.1767	12.7703	0	1	5.8087	4.98027	0	0	3.82195	7.91723	1	0	0.846543	0.969266	0	0	1.91794	1.90103	0	0	0.866373	1.07147	0	0	1.2018	1.16947	0	0
19/3/2018	1.75494	4.46364	0	0	5.60307	3.64056	1	0	1.93557	3.1621	1	0	15.2908	21.7352	0	0	6.18657	5.3705	0	0	3.85833	9.10199	0	0	0.806131	0.963306	0	0	1.79762	1.92634	0	0	0.978622	1.17025	0	0	1.1799	1.17015	0	0
20/3/2018	2.41772	4.6148	0	0	5.26658	2.91868	1	0	1.91693	2.64033	1	0	16.1361	21.766	0	0	5.64888	7.47933	0	0	4.31618	11.8055	0	0	0.869999	0.967404	0	0	1.88927	1.83659	0	0	0.747791	1.11401	0	0	1.15454	1.11822	0	0
21/3/2018	1.69814	2.16161	0	0	5.18883	5.62114	0	0	2.20875	2.76341	1	0	16.1895	13.257	0	0	5.65297	5.0536	0	0	5.23497	12.3195	0	0	0.889949	0.967307	0	0	1.71298	1.74193	0	0	0.737351	1.074	0	0	1.11442	1.07801	0	0
22/3/2018	1.52055	2.41999	0	0	4.41027	10.3901	1	0	2.26308	3.40745	1	0	14.8342	15.8283	0	0	4.66763	5.20884	1	0	6.15499	12.8142	0	0	0.87717	0.958058	0	0	1.56016	1.68393	0	0	0.809252	1.14257	0	0	1.08094	1.07488	0	0
23/3/2018	1.54597	2.2724	0	0	4.48447	13.1344	0	0	1.97475	3.40294	0	0	18.1703	15.5044	0	0	5.65879	4.93983	0	0	6.86615	10.3555	0	0	0.823099	0.949471	0	0	1.76944	2.08945	0	0	0.700656	1.09693	0	0	1.02054	1.08872	0	0
24/3/2018	1.65285	1.274	0	0	3.95428	14.4319	0	0	2.03001	3.64487	0	0	16.6928	12.1655	0	0	6.13563	4.49815	0	0	6.13256	12.5497	0	0	0.805754	0.965076	0	0	1.84757	1.89157	0	0	1.10815	1.03349	0	0	0.983931	1.15186	0	0
25/3/2018	1.68398	1.20211	0	0	3.37364	11.9267	0	0	1.53028	3.29255	0	0	24.6243	13.42	0	0	6.92239	4.58899	0	0	6.81329	9.83805	0	0	0.802894	0.989317	0	0	2.61104	1.96135	0	0	1.11389	1.14871	0	0	0.981201	1.12669	0	0
26/3/2018	1.28267	1.08422	0	0	3.30529	6.68295	0	1	1.95836	3.12107	0	0	12.8533	14.2992	0	0	6.38824	4.82143	0	0	9.27412	10.454	0	0	0.804523	0.989788	0	0	2.2076	1.98886	0	0	0.905624	1.02992	0	0	0.980587	1.14752	0	0
27/3/2018	2.02062	1.36256	0	0	4.79508	4.17626	0	1	1.9478	2.70623	0	0	14.0457	14.1206	0	0	5.18474	5.15773	0	0	8.49377	11.8524	0	1	0.845415	1.006	0	0	1.95572	1.72101	0	0	0.841476	1.19847	0	0	0.964475	1.11231	0	0
28/3/2018	3.58243	1.09465	0	1	3.96374	4.57978	0	1	2.10274	3.86017	0	0	15.4521	16.5082	1	0	5.08988	5.11066	0	0	4.06474	3.94379	0	0	0.795756	1.01461	0	0	2.01623	1.9997	0	0	0.565545	1.17562	0	0	0.961054	1.13645	0	0
29/3/2018	1.666	1.32465	0	0	2.38987	5.20628	1	0	2.63052	2.39795	0	0	19.2392	16.1053	0	0	5.27883	4.81832	0	0	4.11886	10.4599	0	0	0.734957	1.02337	0	0	2.08233	1.87386	0	0	0.580496	1.16779	0	0	1.03373	1.12362	0	0
30/3/2018	1.93028	1.72193	0	0	5.20995	5.1194	0	0	2.3407	2.17783	0	0	19.8333	15.3267	0	2	3.92382	5.50871	0	0	4.47882	11.2977	0	0	0.763148	1.00549	0	0	2.13205	1.76681	0	0	0.643849	1.16269	0	0	1.06021	1.19438	0	0
31/3/2018	2.37521	1.88766	0	0	4.24645	3.97326	0	1	1.82335	2.15678	1	0	27.1563	27.9604	0	1	3.99779	4.537	0	0	4.76331	11.3181	1	0	0.77015	0.959472	0	0	2.03357	2.19129	0	0	0.780613	1.19572	0	0	1.0537	1.12613	0	0
1/4/2018	1.9987	2.30323	0	0	5.58264	4.4072	0	0	1.62278	2.11239	1	0	31.5382	39.7083	0	0	4.74628	5.47995	0	0	3.26945	10.9184	0	0	0.779219	0.956969	0	0	1.93929	1.9539	0	0	0.860438	1.21102	0	0	1.04197	1.17128	0	0
2/4/2018	2.03321	1.60476	0	0	4.83373	3.08698	1	0	1.46921	2.14137	2	0	31.6107	19.6915	0	0	4.33514	5.1809	0	0	2.84771	11.6699	0	0	0.777764	0.935826	0	0	2.10012	1.88448	0	0	0.891993	1.19647	0	0	1.03442	1.16634	0	0
3/4/2018	2.35574	2.05275	0	0	6.37449	2.22602	0	0	1.46523	2.26666	1	0	24.3426	19.5972	0	1	4.88429	5.06844	0	0	3.47327	11.5998	0	0	0.777939	0.93195	0	0	1.94425	2.05589	0	0	1.20171	1.1957	0	0	1.08238	1.20205	0	0
4/4/2018	2.01599	1.91748	0	0	7.03156	2.86076	0	0	1.69683	2.47963	0	0	26.2515	31.2702	0	0	4.85838	5.39169	0	0	3.45341	5.64034	0	0	0.784271	0.940862	0	0	1.61374	2.30985	0	0	1.15577	0.884579	0	0	1.07487	1.17675	0	0
5/4/2018	1.92181	2.27556	0	0	7.39327	2.62864	0	1	1.57813	2.54183	0	0	26.9468	36.9699	0	0	5.47169	5.70853	0	0	4.0823	5.22792	0	0	0.794613	0.938447	0	0	1.62155	2.25425	0	0	0.979827	0.989727	0	0	1.08622	1.14847	0	0
6/4/2018	1.92259	1.98551	0	0	6.8239	6.14587	0	0	2.08972	2.79175	1	0	27.567	36.6793	0	0	5.31665	5.01648	0	0	2.89326	5.61525	0	0	0.821636	0.94044	0	0	1.63427	2.17931	0	0	1.01499	1.01982	0	0	1.13838	1.13178	0	0
7/4/2018	1.71255	1.8129	0	0	6.35437	6.38168	0	0	2.45709	2.7328	0	0	26.6348	35.4081	0	0	5.48956	4.70845	0	0	3.52387	5.71708	0	0	0.82631	0.906324	0	0	1.5393	2.25167	0	0	0.970549	1.00394	0	0	1.13043	1.15344	0	0
8/4/2018	1.90247	1.75046	0	0	7.05045	5.65571	0	0	2.43972	2.95886	0	0	30.9111	28.6486	0	0	6.39586	4.4491	0	0	5.59494	7.39397	0	0	0.770249	0.903333	0	0	1.88161	2.09237	0	0	1.14738	0.970481	0	0	1.06741	1.13344	0	0
9/4/2018	2.07832	1.90787	0	0	6.1465	6.53978	0	0	2.69882	2.91406	0	0	31.1955	32.5269	0	0	5.17183	4.55493	0	0	5.12668	7.69819	1	0	0.809092	0.900375	0	0	2.28925	1.68932	0	0	1.12504	1.17098	0	0	1.06175	1.21335	0	0
10/4/2018	1.83477	1.75755	0	0	6.82234	6.25031	0	0	1.84095	2.72465	0	0	30.3182	31.7722	0	0	5.13728	5.03072	0	0	4.52174	6.01647	1	0	0.796826	1.06183	0	0	2.5635	1.67554	0	0	1.17847	1.09529	0	0	1.052	1.20793	0	0
11/4/2018	2.72908	1.76485	0	0	8.89405	5.26409	0	0	2.28569	1.99549	0	0	30.9163	30.9291	1	0	4.5716	5.46344	0	0	4.63404	6.1744	1	0	0.800355	1.05739	0	0	1.8588	1.67197	0	0	1.25873	1.18631	0	0	1.00121	1.25801	0	0
12/4/2018	2.81874	1.7977	0	0	8.58521	5.39877	0	1	2.59834	2.20839	0	0	33.3082	27.7292	0	0	4.30977	5.68693	0	0	4.29005	5.83312	2	0	0.727918	1.04754	0	0	1.77656	1.75501	0	0	1.2594	1.01519	0	0	0.978676	1.26985	0	0
13/4/2018	2.5464	2.02378	0	0	7.32095	7.30119	0	1	2.6479	2.16853	0	0	26.79	25.2942	0	0	4.03791	5.35624	0	0	4.36981	7.19346	2	0	0.723305	1.04107	0	0	1.70204	1.90121	0	0	1.19089	0.806277	0	0	0.987259	1.14549	0	0
14/4/2018	2.05063	2.46036	0	0	7.19134	7.56047	0	0	2.47525	2.11467	0	0	28.1786	26.5488	0	0	3.83312	5.31578	0	0	4.44433	6.04817	0	0	0.700711	0.976449	0	0	1.627	1.55259	0	0	1.35697	0.803577	0	0	0.998136	0.995228	0	0
15/4/2018	1.58895	2.12346	0	0	7.77271	7.51742	0	0	2.29274	1.43613	1	1	30.025	24.6186	0	0	4.96149	6.02204	0	0	5.82286	6.30274	0	0	0.858128	0.972099	0	0	1.63682	1.67639	0	0	1.24743	0.985933	0	0	1.00824	1.06627	0	0
16/4/2018	2.07749	1.93127	0	0	5.74892	7.58609	0	0	2.09562	1.66216	1	0	30.8474	25.5565	0	0	5.1431	5.43521	0	0	11.146	6.03774	0	0	1.02587	0.99004	0	0	1.57889	1.68997	0	0	1.34803	0.905412	0	0	1.07761	1.08511	0	0
17/4/2018	1.72769	2.22822	0	0	5.97802	7.15964	0	0	2.59676	1.57209	1	0	30.9817	33.2178	0	0	5.43714	5.65028	0	0	12.2765	6.74269	0	0	1.01883	0.979973	0	0	1.53534	2.14237	0	0	1.26902	0.958539	0	0	1.08616	1.12351	0	0
18/4/2018	1.64671	2.032	0	0	5.63928	6.11503	0	1	3.04084	1.52154	0	0	31.8737	31.9887	0	0	5.5219	4.28372	0	0	3.6174	7.07068	1	0	1.02343	0.975757	0	0	2.33709	1.73018	0	0	1.28386	0.879698	0	0	1.10163	1.21629	0	0
19/4/2018	1.5342	2.30297	0	0	5.37861	5.90057	0	0	2.95849	1.42468	0	1	36.3577	33.8285	0	0	5.69049	4.90967	0	0	7.64113	7.98585	0	0	1.03212	0.981115	0	0	1.38401	2.19583	1	0	1.38902	0.946155	0	0	1.17325	1.21789	0	0
20/4/2018	1.48942	2.54253	0	0	5.72818	5.31908	0	0	2.79729	1.4227	0	1	38.2649	34.5579	0	0	5.69595	5.64895	0	0	9.73887	9.85507	0	0	0.880143	0.978438	0	0	1.45177	1.68456	0	0	1.3113	1.015	0	0	1.14722	1.26781	0	0
21/4/2018	1.7348	1.88319	0	0	5.63656	5.18644	0	0	2.435	1.53505	0	0	39.6722	42.9915	0	0	5.69985	5.78167	0	0	7.20578	9.29571	0	0	0.89575	0.983215	0	0	1.72625	1.67877	0	0	1.55597	1.04202	0	0	1.15211	1.11448	0	0
22/4/2018	1.6869	1.8718	0	0	5.65617	4.88421	0	0	3.80339	1.74553	0	0	36.1482	49.0339	0	0	5.84769	5.46446	0	0	11.632	8.68264	0	1	0.910297	0.977789	0	0	1.49614	1.69147	1	0	1.37138	1.50606	0	0	1.07016	1.57174	0	0
23/4/2018	1.67008	1.83536	0	0	6.01745	6.87957	0	0	4.30705	1.34883	0	1	36.9308	41.1802	0	1	5.30167	5.20443	1	0	9.03762	10.4618	0	0	0.910415	0.986038	0	0	1.76445	2.01905	0	0	1.3819	1.05782	0	0	1.0183	1.53351	0	0
24/4/2018	1.86206	1.60422	0	0	5.72529	7.16266	0	0	2.41332	1.3572	0	0	34.3397	38.2017	0	0	5.41229	4.8807	0	0	8.75155	10.96	1	0	0.914079	0.999295	0	0	1.93828	2.00032	0	0	1.38648	1.31487	0	0	0.937026	1.61107	0	0
25/4/2018	1.619	2.17285	0	0	6.9829	4.10373	0	0	1.84322	1.29609	1	0	34.8775	42.5239	0	0	5.45903	4.89397	0	0	9.824	10.116	0	0	0.844937	0.965085	0	0	1.66393	1.75561	0	1	1.12663	1.24773	0	0	0.932151	1.10948	0	0
26/4/2018	1.20546	2.47658	1	0	5.15349	4.17322	0	0	1.818	0.976462	0	0	32.45	38.8104	0	0	5.21731	5.13345	0	0	9.86566	7.12648	0	0	0.689514	0.959705	0	0	1.63389	1.95992	0	0	1.14395	1.84882	0	0	0.898978	1.10217	0	0
27/4/2018	1.60285	2.15301	0	0	4.69477	4.42324	0	1	1.77361	1.45938	1	0	24.9111	47.9897	0	0	5.05608	5.41202	0	0	8.42781	5.52746	0	0	0.629246	0.889885	0	0	1.62023	2.01781	0	0	1.37457	1.29194	0	0	0.888806	1.13674	0	0
28/4/2018	1.36632	2.02278	0	0	5.43998	5.99617	0	0	2.93756	1.22108	1	0	23.9589	43.5441	0	0	5.19913	5.2384	0	0	8.877	4.7094	0	0	0.704425	0.948844	0	0	1.59472	2.3541	0	0	1.50487	1.42943	0	0	1.00825	1.22235	0	0
29/4/2018	1.47122	1.73062	0	0	4.95554	6.70007	0	1	1.60362	2.35513	1	1	23.2352	33.8757	0	0	5.37453	5.85922	0	0	5.66224	3.61416	1	0	0.695101	0.927217	0	0	2.44444	2.29076	0	0	1.23845	1.34047	0	0	1.00314	1.24593	0	0
30/4/2018	1.64172	1.8815	0	0	5.26607	6.29284	0	0	1.81077	1.92987	1	1	25.5025	40.4117	0	0	5.08914	5.70757	0	0	5.02555	3.63369	1	0	0.680766	0.957912	0	0	1.59613	1.98148	0	0	1.22599	1.36092	0	0	1.02391	1.2309	0	0
1/5/2018	1.48521	1.74552	0	0	5.62489	6.40993	0	1	1.71933	1.69462	1	1	25.9342	38.4832	0	0	4.6291	5.79582	0	0	3.67233	4.17966	1	0	0.673302	0.951146	0	0	1.66622	1.89518	0	0	1.20889	1.19404	0	0	1.01997	1.24952	0	0
2/5/2018	1.76199	1.63267	0	1	4.23941	6.63705	0	1	1.60891	2.52533	1	1	30.4953	36.6413	0	0	4.79798	5.81961	0	0	5.66411	3.56863	2	1	0.684481	0.958621	0	0	1.59021	1.954	0	0	0.959368	1.19745	1	0	1.09942	1.23972	0	0
3/5/2018	1.76243	1.50213	0	0	3.96398	7.2539	0	0	1.57967	2.42241	0	1	27.0236	35.8889	0	0	3.81985	6.1475	0	0	6.10321	3.87127	0	1	0.830699	0.885574	0	0	1.43713	1.95298	0	0	1.14671	1.51801	0	0	1.11254	1.23056	0	0
4/5/2018	1.63534	1.502	0	0	4.17492	8.62872	0	0	1.37459	3.16802	1	2	26.3086	31.7363	0	0	3.53643	5.41563	0	0	9.24508	5.06044	0	0	0.813934	0.877597	0	0	1.44696	1.56841	0	0	1.43365	1.53056	0	0	1.08733	1.27454	0	0
5/5/2018	1.50336	1.30587	0	0	3.93065	8.37162	0	0	1.34552	1.39157	1	1	25.3333	29.7037	0	0	3.59081	5.67931	0	0	7.18287	6.85532	0	0	0.805881	0.822174	0	0	1.70618	1.59712	0	0	1.55783	1.20695	0	1	1.05988	1.10153	0	0
6/5/2018	1.86574	1.97954	0	0	5.14434	5.69118	0	0	1.30453	1.39885	0	2	20.2553	30.7344	1	0	3.7573	5.74474	0	0	7.59884	5.12363	0	0	0.806687	0.868822	0	0	2.24329	1.59054	0	0	1.71595	1.14344	0	0	1.06226	1.21983	0	0
7/5/2018	1.72963	2.03402	0	0	6.73219	6.09349	1	0	1.3135	1.34171	1	2	20.5753	25.7833	0	0	4.60593	5.88112	0	0	6.71711	5.45122	0	0	0.947138	0.848149	0	0	2.01071	1.47955	0	0	1.52658	1.17804	0	0	1.02545	1.12939	0	0
8/5/2018	1.45504	1.841	1	0	4.52957	5.93288	1	0	1.11544	1.14974	0	1	25.0689	29.1881	0	0	5.88297	4.63588	0	0	4.8792	5.95642	0	0	0.947169	0.772012	0	0	2.01712	1.48894	0	0	1.56823	1.07077	0	0	1.02903	1.03246	0	0
9/5/2018	1.72084	1.95751	1	0	5.33251	5.44685	1	0	1.1361	1.09084	0	0	24.5447	30.9281	0	0	6.09178	5.09236	0	0	5.72368	5.92889	0	0	0.942395	0.808653	0	0	1.80005	1.46866	0	0	1.50021	1.08878	0	0	1.01514	0.936759	0	0
10/5/2018	1.35957	1.84882	0	0	6.83826	4.66211	0	0	1.07824	1.07583	0	1	23.9476	29.1679	0	0	4.8267	5.26126	0	0	5.13755	5.52255	0	1	1.07862	0.823797	0	0	1.84189	1.37241	0	1	1.62573	1.10977	0	2	0.882487	0.840397	0	0
11/5/2018	1.27948	1.99928	0	0	7.01077	5.80512	0	1	0.871163	1.6664	0	1	28.2228	30.7295	0	0	5.7931	5.62731	0	0	6.25381	4.60864	0	0	0.794352	0.822367	0	0	1.83865	1.50839	0	0	1.14692	1.08877	1	0	0.978291	0.869072	0	0
12/5/2018	1.38275	2.23667	0	0	7.29895	5.36746	0	0	1.22002	0.728867	1	1	20.7519	30.1893	0	0	5.33239	5.29903	0	0	3.65763	4.95133	0	0	0.824803	0.743417	0	0	1.79288	1.5271	0	1	1.14741	1.56913	0	1	0.961781	0.860118	0	0
13/5/2018	1.19734	2.2065	0	0	7.55562	5.39979	0	0	1.59064	1.14883	1	1	19.6394	31.1072	0	0	4.80239	3.51785	0	0	5.84072	4.00766	0	0	0.821351	0.587686	0	0	1.95795	1.32221	0	1	1.16466	1.54068	0	1	0.875811	0.868039	0	0
14/5/2018	1.1418	2.20557	0	0	9.62162	4.15742	0	0	1.74564	1.55477	0	0	19.762	27.7156	0	0	4.10722	5.27579	0	0	5.43958	5.12732	0	0	0.782431	0.520928	0	0	2.28247	1.26254	0	1	1.1727	1.52656	0	0	0.843797	0.962804	0	0
15/5/2018	1.05668	1.95287	0	0	7.03392	4.51631	0	0	1.69663	1.21203	0	0	17.6379	29.9916	0	0	4.79641	5.26184	0	0	5.37677	4.66987	0	0	0.775904	0.5201	0	0	2.04555	1.23687	0	1	1.01695	1.50507	0	0	0.984495	1.28097	0	0
16/5/2018	1.23348	1.74022	0	0	6.75358	4.11012	0	0	1.88766	1.36683	0	0	23.5193	27.5423	0	0	4.83746	6.23272	0	0	6.16548	3.37202	0	0	0.778692	0.684501	0	0	1.95669	1.21748	0	1	0.806078	1.39443	1	0	0.959906	1.20016	0	0
17/5/2018	1.50504	1.8918	0	0	6.39383	4.77873	0	0	2.12296	1.23125	0	0	23.356	27.0176	0	0	4.4201	4.34608	0	0	11.6548	3.30773	0	1	0.746273	0.692043	0	0	2.49454	1.0989	0	1	0.840339	1.19058	1	0	0.938724	1.11866	0	0
18/5/2018	1.01412	1.54749	1	0	6.75417	5.83492	0	0	2.19756	0.924509	0	0	21.7875	29.4456	0	0	4.31074	4.80767	0	0	11.4653	4.15797	0	0	0.802773	0.696622	0	0	1.84907	1.06426	0	1	1.09938	0.909737	0	0	1.00635	1.04747	0	0
19/5/2018	1.44546	1.47113	0	0	5.89711	8.10543	2	0	1.956	0.938612	0	1	22.8937	29.3944	1	0	3.68557	4.82006	0	0	12.9781	3.77687	0	0	0.793523	0.68855	0	0	1.97835	1.0583	0	1	0.97969	1.15893	0	0	0.925561	0.938774	0	0
20/5/2018	0.756152	1.55997	0	0	5.90445	7.26951	1	1	1.41124	0.88648	0	1	16.6172	31.4445	0	0	4.05358	4.53153	0	0	6.84959	4.04825	0	0	0.811099	0.955341	0	0	1.71929	1.32245	0	0	0.996491	1.17987	0	0	0.911796	0.999241	0	0
21/5/2018	0.983758	1.47189	0	0	7.2633	5.06233	0	0	1.38571	1.24537	0	1	19.5471	23.5765	0	0	4.43062	3.56859	0	0	7.86786	6.06064	0	0	0.744284	0.718956	0	0	1.67124	1.20692	0	0	0.956394	1.04611	0	0	1.08444	0.972011	0	0
22/5/2018	0.936756	1.35702	0	0	7.22099	4.29473	0	0	0.782949	1.30073	0	0	20.6638	27.6716	0	1	4.62139	3.57579	0	0	5.76787	7.64317	0	0	0.676217	0.701508	0	0	1.61823	1.15403	0	0	1.04991	1.14724	0	0	1.1293	0.947508	0	0
23/5/2018	1.27943	1.38855	0	0	5.04154	4.54481	1	0	0.775787	0.954262	0	0	19.91	25.729	0	1	3.56811	3.57653	0	0	4.32666	5.03242	0	0	0.608745	0.686546	0	0	1.55846	1.31718	0	0	1.01688	1.01427	0	0	1.09527	0.89124	0	0
24/5/2018	1.21658	1.70056	0	0	4.49858	5.02892	0	1	0.92282	0.836066	1	0	19.6221	26.3552	0	0	3.61274	3.6312	0	0	3.98111	3.44353	1	0	0.656169	0.780732	0	0	1.62328	1.10566	0	0	1.19525	1.06013	0	0	1.12495	0.856014	0	0
25/5/2018	1.04393	1.62436	0	0	4.6659	3.91284	0	2	1.08838	0.929055	0	1	23.316	25.8026	0	0	4.11478	3.39684	0	0	4.94817	3.98368	0	0	0.672052	0.54142	0	0	1.73346	1.16016	0	0	1.08642	0.871515	0	0	1.1659	1.0243	0	0
26/5/2018	1.01532	2.18558	0	0	5.94497	2.74883	0	1	1.20312	0.937314	0	0	26.7567	26.7428	1	0	4.06755	3.35389	0	0	8.5213	2.89121	0	0	0.663048	0.550075	0	0	2.12642	1.33872	0	0	1.15337	0.900128	0	0	1.14651	0.91135	0	0
27/5/2018	1.32809	1.80953	0	0	5.76212	2.61285	0	1	1.23182	0.986552	0	0	21.5751	23.1977	2	0	3.82037	3.66926	0	0	6.43396	2.9038	0	0	0.661401	0.56651	0	0	1.78565	1.31847	0	0	1.1703	0.839346	0	0	1.23351	0.831012	0	0
28/5/2018	1.31084	1.91158	0	0	6.96692	2.73789	0	1	1.166	1.06479	0	0	21.1294	21.8747	1	0	3.95826	4.07718	0	0	4.8515	2.48446	1	1	0.654251	0.610237	0	0	1.75413	1.35936	0	0	1.08128	0.743175	0	0	1.21937	0.838757	0	0
29/5/2018	1.37408	1.43564	0	0	4.98577	2.70154	0	0	0.993781	1.01288	0	0	22.936	21.1105	0	0	3.82803	3.9231	0	0	7.69444	3.51377	0	0	0.91021	0.450396	0	0	1.7154	1.76874	0	0	0.983144	0.916652	0	0	1.19473	0.874326	0	0
30/5/2018	1.73035	1.53175	0	0	4.77795	1.87887	0	0	1.12216	1.08767	0	0	31.8802	32.0223	0	0	4.18686	4.06326	0	0	8.70354	2.92238	0	1	0.997171	0.448499	0	0	1.82706	1.26806	0	0	0.988898	0.789387	0	0	1.1505	1.08593	0	0
31/5/2018	1.4698	1.17182	0	0	4.74235	1.59371	0	2	1.17875	1.18613	0	0	26.047	21.1889	0	0	3.79829	4.17014	0	0	4.03243	3.5607	1	0	0.750397	0.455335	0	0	2.11002	2.1169	0	0	1.10281	0.732821	0	0	1.13066	1.0606	0	0
1/6/2018	1.50532	1.33783	0	0	3.85013	2.5406	1	0	0.926445	1.14453	0	0	28.6469	20.148	0	0	3.9241	4.19871	0	0	2.83819	3.3695	2	0	0.761821	0.385913	0	0	1.77865	2.40263	0	0	1.18572	0.673963	0	0	1.00026	0.805339	0	0
2/6/2018	1.544	1.30774	0	0	3.77946	2.51521	1	0	0.755111	0.97488	0	0	33.0902	16.7376	0	1	3.52331	3.84942	0	0	3.39997	3.76071	1	0	0.577074	0.387722	0	0	1.37131	2.47614	0	0	0.972012	0.777922	1	0	0.99993	0.804795	0	0
3/6/2018	1.06137	1.01721	0	0	3.60853	2.55294	0	0	0.759517	0.998406	0	0	23.9977	16.5398	0	0	3.57101	4.14878	0	0	3.38289	4.00203	1	0	0.501332	0.441961	0	0	1.38521	2.38412	0	0	1.01854	0.642231	0	0	0.983214	0.849491	0	0
4/6/2018	1.32768	0.942064	0	0	3.9648	2.30219	0	0	0.768858	0.662587	0	0	17.2789	21.136	0	0	3.41473	4.09535	0	0	5.63325	3.68321	1	0	0.473958	0.437967	0	0	1.55175	2.01505	0	0	0.998447	0.889929	0	0	0.986038	0.872416	0	0
5/6/2018	1.53483	0.874757	0	0	3.51194	2.93686	0	0	0.807236	0.676759	0	1	15.3136	19.1614	0	1	3.50459	3.84715	0	0	4.05743	3.57848	0	0	0.467929	0.36175	0	0	1.12351	1.33872	0	0	0.818728	1.1838	0	0	0.971581	0.859843	0	0
6/6/2018	1.29721	0.924462	0	0	3.49869	2.7168	0	0	0.835934	0.907159	0	1	16.2139	12.4813	0	1	3.41221	3.06881	0	0	3.32087	3.93374	0	0	0.500692	0.293526	0	0	1.07687	1.39348	0	0	1.22641	1.15641	0	0	1.00861	0.928308	0	0
7/6/2018	1.27687	0.930115	0	0	2.91262	2.75943	0	0	0.785979	1.15599	0	1	15.9665	17.0733	0	0	3.33021	3.29782	0	0	3.36094	3.66344	0	0	0.479409	0.293942	0	0	1.59386	1.35049	0	0	0.962955	1.4718	0	0	0.90082	0.949022	0	0
8/6/2018	1.18135	0.94074	0	0	3.06361	2.92363	0	0	0.756608	1.36674	0	1	23.2025	17.0265	0	0	3.27218	2.82407	0	1	3.18168	3.64193	0	0	0.517881	0.220786	0	0	1.32473	1.21948	0	0	0.919537	1.21686	0	0	0.856504	0.935888	0	0
9/6/2018	0.944347	1.12312	0	0	3.07248	2.75841	0	0	0.842328	1.0922	1	0	15.3508	18.8586	0	0	3.52074	2.94615	0	1	3.6407	3.98468	0	1	0.388092	0.222149	0	0	1.46769	1.24085	0	0	0.842386	1.27709	0	0	0.882168	0.887952	0	0
10/6/2018	1.07382	0.994003	0	0	3.69283	3.61165	0	0	0.936472	1.11963	1	0	28.0333	17.9558	0	0	2.56318	2.64583	0	1	3.60261	3.23889	1	1	0.388795	0.221742	0	0	1.71555	1.20074	0	0	0.821553	1.20109	0	0	0.845572	0.868443	0	0
11/6/2018	0.945026	0.937289	0	0	3.27272	3.51629	0	0	1.117	1.15129	0	0	17.9308	16.8306	1	0	2.61936	2.36339	0	1	3.98691	3.13388	0	0	0.390695	0.25779	0	0	1.62312	1.55282	0	0	0.682775	1.16461	0	0	0.846263	0.851848	0	0
12/6/2018	0.930457	0.944347	0	0	3.41046	2.56958	1	0	1.13274	1.04009	0	0	12.6676	17.363	0	0	2.26113	2.45416	0	1	3.84907	3.00448	0	0	0.429788	0.255771	0	0	1.53625	1.70041	0	0	0.704222	1.05563	0	0	0.815677	0.825956	0	0
13/6/2018	1.15436	0.816519	0	0	3.54583	2.47091	2	0	1.21278	1.11299	0	0	14.7493	18.4162	0	0	2.35653	2.2283	0	0	4.20879	3.18772	0	0	0.396543	0.250891	0	0	1.53738	1.70924	0	0	0.706767	1.02714	0	0	0.823447	0.885662	0	0
14/6/2018	1.10298	0.874708	1	0	4.23911	3.019	1	0	1.09256	1.26598	0	0	16.6792	24.7631	1	0	2.17431	2.18452	0	0	3.73879	2.97647	0	0	0.396906	0.280474	0	0	1.61016	1.36816	0	0	0.692394	1.00997	0	0	0.850068	0.879042	0	0
15/6/2018	1.37133	0.988011	0	0	4.05112	3.05117	0	0	0.761007	1.35019	0	0	25.5053	17.5034	1	0	1.97158	2.70178	0	1	3.34894	3.87791	0	0	0.393918	0.238873	0	0	1.58455	1.40329	0	0	0.688604	1.05007	0	0	0.913599	0.876129	0	0
16/6/2018	1.08853	0.839849	0	0	4.0273	3.06716	1	0	0.641821	1.23961	0	0	15.2791	15.226	0	0	1.89324	2.49934	0	0	3.20409	4.28377	0	0	0.461259	0.268923	0	0	1.53864	1.387	0	0	0.617086	1.00956	0	0	0.935144	0.909827	0	0
17/6/2018	1.09438	0.887932	0	0	3.89495	4.24643	1	0	0.774833	0.888829	0	0	28.171	20.7918	0	0	1.67806	2.69897	0	1	3.5641	3.76618	1	0	0.310025	0.262923	0	0	1.73301	1.33521	0	0	0.610964	0.937395	0	0	0.887565	0.882547	0	0
18/6/2018	0.908076	0.773304	0	0	2.97133	5.47612	1	0	0.829852	0.684761	0	0	9.36431	24.2024	0	0	1.50222	2.64399	0	1	3.20784	3.35094	1	0	0.30715	0.261486	0	0	1.88431	1.2692	0	0	0.57366	0.913447	0	0	0.840656	0.781731	0	0
19/6/2018	0.834581	0.883075	0	0	2.90819	4.84774	1	1	0.856717	0.607215	0	0	8.54005	17.3427	0	0	1.28679	2.72584	0	0	3.04026	3.47917	1	0	0.231273	0.290998	0	0	1.68688	1.52416	0	0	0.803752	0.865762	0	0	0.912689	0.919092	0	0
20/6/2018	0.762776	0.890501	0	0	7.04877	2.29465	1	1	0.716285	0.877464	0	0	10.3254	19.432	0	0	1.35484	2.92329	0	1	2.90966	3.43947	1	0	0.305763	0.246764	0	0	1.55029	1.84961	0	0	0.877691	0.925859	0	0	0.93517	0.872348	0	0
21/6/2018	0.792226	1.1724	0	0	3.25991	2.39255	0	0	0.802869	0.613412	0	0	10.4038	19.2051	0	0	1.81355	2.68239	0	1	2.88843	3.51488	2	0	0.337115	0.228211	0	0	1.65223	1.30593	0	0	1.00745	0.746625	0	0	0.915965	0.868737	0	0
22/6/2018	0.696466	1.18952	0	0	2.98723	2.62039	0	0	0.725907	0.756278	0	0	8.45461	16.6705	1	0	1.40636	2.79349	0	0	3.09771	3.69679	1	0	0.254694	0.21696	0	0	1.60943	1.32018	0	1	0.946844	0.733244	0	0	0.90953	0.773669	0	1
23/6/2018	0.673193	1.06703	0	0	2.53858	2.58947	0	0	0.747306	0.717331	0	0	8.51177	17.2503	1	0	1.58375	2.21219	0	0	2.92434	4.0258	2	0	0.251146	0.211077	0	0	1.57916	1.19573	0	1	0.970339	0.909037	0	0	0.909849	0.795363	0	0
24/6/2018	0.90824	0.925496	0	0	3.05614	6.26259	0	1	0.686908	0.70671	0	0	9.25856	14.751	1	0	1.81523	3.1638	0	0	2.19967	4.20543	2	0	0.287472	0.241705	0	0	1.63423	1.30629	0	0	0.919682	0.88245	0	0	0.941089	0.719939	0	0
25/6/2018	0.812045	1.39435	0	0	2.22331	6.64493	1	1	0.838519	0.811299	0	0	14.4861	26.8579	0	0	1.87429	2.16503	1	0	2.71376	4.28518	1	0	0.321889	0.236599	0	0	1.42127	1.34348	0	0	1.01329	0.883248	0	0	0.814198	0.734921	0	1
26/6/2018	0.837148	0.893135	0	0	2.37709	6.64271	0	1	0.823207	0.732555	1	0	10.3858	31.7797	0	0	1.95095	1.445	1	0	3.078	4.43734	1	0	0.321044	0.238322	0	0	1.49955	1.38932	0	0	0.685303	0.850887	0	0	0.833034	0.734641	0	1
27/6/2018	0.780572	0.869527	0	0	3.48204	7.09358	0	0	0.688674	0.842046	1	1	10.0352	24.0684	0	0	1.95181	1.60973	0	0	3.53624	4.5013	1	0	0.312564	0.234003	0	0	1.19263	1.53783	0	0	0.6939	0.946942	0	0	0.824552	0.840094	0	0
28/6/2018	0.801398	0.821112	0	1	4.07408	7.18237	0	0	0.719752	1.6895	0	0	13.4059	16.5654	0	0	1.82617	1.52872	0	0	2.8503	4.27835	1	0	0.309089	0.230623	0	0	1.15048	1.71236	0	0	0.720732	0.675138	0	0	0.830614	0.816161	0	0
29/6/2018	0.781877	0.683702	0	0	4.20081	6.42682	0	0	0.635216	0.705457	1	1	15.614	26.9188	0	0	1.71573	0.988835	0	0	3.17093	4.0747	0	0	0.309366	0.234318	0	0	1.76871	1.69972	0	0	0.772639	0.751841	0	0	0.75285	0.896105	0	0
30/6/2018	0.83028	0.693238	0	0	4.76115	6.82408	0	0	0.630453	0.773335	0	1	17.3506	15.5109	0	0	1.82247	0.849594	0	0	2.49628	4.3698	0	0	0.312504	0.238251	0	0	1.49298	1.65348	0	0	0.666177	0.733316	0	0	0.756758	0.953326	0	0
1/7/2018	1.0184	0.476848	0	0	4.60655	6.02417	0	0	0.499547	0.762017	1	1	25.3447	15.1095	0	0	1.57761	0.964668	0	1	2.42802	3.82789	0	0	0.308049	0.239733	0	0	1.43398	1.33632	0	0	0.536507	0.572254	0	0	0.747197	0.956045	0	0
2/7/2018	0.701324	0.589236	0	0	4.06817	6.59326	0	1	0.554807	0.539913	1	1	16.2566	18.6474	0	0	1.59175	0.757593	0	1	3.35093	3.1325	0	0	0.30209	0.242341	0	0	1.36023	1.39355	0	0	0.558036	0.55891	0	0	0.783566	0.979203	0	0
3/7/2018	0.693685	0.65566	1	0	3.34438	5.10685	0	0	0.559082	0.672002	0	1	14.2324	14.5881	0	0	1.27263	0.798799	0	1	3.07106	2.98362	0	0	0.262494	0.240758	0	0	1.34016	1.49432	0	0	0.649759	0.585009	0	0	0.804301	0.981688	0	0
4/7/2018	0.619041	0.602817	1	0	3.57146	5.32205	0	0	0.892107	0.696084	1	1	11.6509	20.743	0	0	1.51684	0.738109	0	1	2.93952	3.50017	0	0	0.239333	0.239273	0	0	1.18481	1.6735	0	0	0.769796	0.529965	0	0	0.774344	0.996207	0	0
5/7/2018	0.585741	0.617198	0	0	2.97937	6.47675	1	1	0.708313	0.613012	0	1	10.8583	18.3776	0	0	1.54887	1.81786	1	1	3.33199	3.67658	0	0	0.235099	0.195333	0	0	1.20886	1.46996	0	0	0.815565	0.535309	0	0	0.777941	0.995059	0	0
6/7/2018	0.602096	0.665176	0	0	3.81758	6.6514	0	0	0.754678	0.530947	1	0	11.3707	18.5197	0	0	1.4862	1.71835	0	0	2.78778	2.94271	0	0	0.234731	0.190849	0	0	1.21735	1.32564	0	1	0.700833	0.493619	0	0	0.786744	0.979076	0	0
7/7/2018	0.649597	0.61477	0	0	3.56868	6.59047	1	0	0.853363	0.545205	1	0	11.3499	16.8828	0	0	1.18594	1.72111	1	1	2.79597	2.94398	1	0	0.229481	0.184468	0	0	1.45551	1.32928	0	0	0.773136	0.556657	0	0	0.774145	0.926069	0	0
8/7/2018	0.704198	0.659033	1	0	2.41334	5.66816	2	0	0.759516	0.51435	1	0	11.7237	14.8938	0	0	1.16077	0.563017	2	1	2.53974	3.08586	1	0	0.153061	0.165256	0	0	1.39418	1.29501	0	0	0.701968	0.626448	0	0	0.773294	0.889926	0	0
9/7/2018	0.679504	0.636796	0	0	2.81196	5.18664	1	0	0.819302	0.513474	0	1	12.9799	12.4323	0	0	1.20445	0.520434	1	1	2.64319	2.69968	1	0	0.17539	0.085149	0	0	1.47721	1.15093	0	0	0.686988	0.695216	0	0	0.812439	0.900094	0	0
10/7/2018	0.843436	0.639482	0	0	2.33318	4.87134	1	0	0.654728	0.614829	0	1	12.0504	11.9339	0	0	0.764486	0.554797	2	1	2.55788	3.02377	1	0	0.204017	0.0749992	0	0	1.28858	1.29952	0	0	0.691539	0.79201	0	0	0.81713	0.848174	0	0
11/7/2018	0.666027	0.847043	0	0	4.04465	4.78381	1	0	0.612375	0.633857	0	0	13.235	15.6747	0	1	0.617304	0.405275	2	2	2.68989	3.26681	0	0	0.19285	0.107145	0	0	1.11785	1.38315	0	0	0.705237	0.720733	0	0	0.824734	0.836758	0	0
12/7/2018	0.943829	0.940457	0	0	3.8475	4.96653	1	0	0.585308	0.743185	0	0	16.1375	8.81895	0	1	0.543046	0.38185	1	2	3.42471	2.863	0	0	0.175712	0.100726	0	0	0.940197	1.29947	0	0	0.718634	0.6794	0	0	0.878012	0.929734	0	0
13/7/2018	0.816326	0.937885	0	0	3.51229	5.51011	0	0	0.674655	0.649307	1	0	26.0956	16.3647	0	0	0.910235	0.301999	1	3	2.86361	2.91961	0	0	0.165618	0.140704	0	0	1.07276	1.37859	0	0	0.752476	0.800753	0	0	0.829737	0.852037	0	0
14/7/2018	0.570498	0.813293	0	0	3.18043	5.02535	0	0	0.676446	0.615143	0	0	29.861	11.9664	0	0	0.9277	0.45464	0	3	2.9828	2.43686	0	0	0.160177	0.139021	0	0	1.12325	1.48818	0	0	0.736232	0.869792	0	0	0.907636	0.96224	0	0
15/7/2018	0.583519	0.820024	0	0	2.0566	5.0978	0	0	0.492272	0.588559	0	0	33.8362	11.3602	0	0	0.861721	0.560455	0	3	2.1182	2.63207	1	0	0.159313	0.163386	0	0	1.20319	1.39503	0	0	0.820318	0.733574	0	0	0.964162	0.84991	0	0
16/7/2018	0.75882	0.768727	0	0	1.84286	5.03884	0	1	0.373341	0.560894	0	0	32.0246	8.73195	0	0	0.792864	0.447596	0	1	2.24755	2.57716	0	0	0.155845	0.151644	0	0	1.03491	1.38366	0	0	0.850939	0.775576	0	0	1.02787	0.893829	0	0
17/7/2018	0.801771	0.795328	0	0	1.87981	4.87167	0	0	0.401637	0.584966	0	0	14.1695	9.25446	0	0	0.790105	0.45769	2	1	2.28585	2.07279	0	0	0.15488	0.14227	0	0	1.07171	1.24598	0	0	0.858259	0.752371	0	0	0.996887	1.01869	0	0
18/7/2018	0.835527	0.515417	0	0	1.41369	2.90378	0	0	0.266539	0.540712	1	0	16.2001	9.40195	0	1	0.625068	0.400685	1	1	2.52257	2.20914	0	0	0.156067	0.133076	0	0	1.0933	1.45558	0	0	0.79496	0.68552	0	0	0.895601	1.00729	0	0
19/7/2018	0.61244	0.44018	0	0	1.95893	1.96484	0	0	0.305029	0.519494	1	0	18.6888	9.72028	0	1	0.333727	0.401376	2	0	2.56469	2.42642	0	0	0.153502	0.123566	0	0	1.17791	1.09275	0	0	0.930673	0.719978	0	0	0.850213	1.04174	0	0
20/7/2018	0.533265	0.485566	0	0	1.42033	2.63212	0	0	0.276001	0.48225	2	0	16.6932	9.69903	0	0	0.373086	0.367545	2	2	2.21896	2.18381	0	0	0.140448	0.114942	0	0	1.27782	1.14988	0	0	0.700572	0.761045	0	0	0.872451	1.04653	0	0
21/7/2018	0.634838	0.397594	0	0	1.60556	1.94291	0	0	0.306191	0.434164	1	0	17.1726	5.73502	0	0	0.385518	0.430572	2	1	2.35521	2.10085	0	0	0.127095	0.112536	0	0	1.17068	1.1592	0	0	0.707662	0.74956	0	0	0.799973	0.982334	0	0
22/7/2018	0.559826	0.511931	0	0	2.03784	3.96163	0	0	0.296346	0.44308	0	0	17.5593	6.08387	0	0	0.462687	0.392172	1	2	2.08781	2.13148	0	0	0.124038	0.110418	0	0	1.84724	1.41811	0	0	0.738106	0.891681	0	0	0.80985	0.950112	0	0
23/7/2018	0.683531	0.558529	0	0	2.40044	3.85665	1	0	0.416633	0.407783	0	0	18.179	5.38723	0	1	0.495341	0.384769	1	3	2.22747	2.34412	1	0	0.118915	0.108193	0	0	1.504	1.37956	0	0	0.738864	0.821561	0	0	0.8144	0.90781	0	0
24/7/2018	0.534689	0.475969	0	0	2.22048	1.83416	1	1	0.346927	0.255158	1	0	13.8225	23.4897	0	1	0.629393	0.382974	1	1	2.30794	2.41395	0	0	0.107023	0.111264	0	0	1.36184	1.18871	0	0	0.746361	0.822959	0	0	0.800433	0.861729	0	0
25/7/2018	0.485796	0.380499	0	0	2.28631	2.32348	0	1	0.245534	0.221041	2	0	13.0884	28.9913	1	1	0.588913	0.257089	1	2	2.57464	2.28026	0	0	0.100445	0.113458	0	0	1.02687	1.17138	1	0	0.770897	0.889524	0	0	0.830956	0.79121	0	0
26/7/2018	0.841784	0.268717	0	0	2.07276	2.55564	0	2	0.229517	0.212749	1	0	12.9229	25.2533	1	1	0.651015	0.26012	1	1	2.3232	2.39162	0	0	0.0937515	0.114018	0	0	1.00561	1.16358	0	0	0.798101	0.907726	0	0	0.762199	0.882539	0	0
27/7/2018	0.675355	0.269885	0	0	2.12801	2.27482	0	2	0.29093	0.36749	2	0	7.98337	34.8632	1	1	0.347142	0.233309	1	2	2.46515	2.53591	0	0	0.0824691	0.11077	0	0	1.04653	1.10262	0	0	0.770337	0.902693	0	0	0.812935	0.885206	0	0
28/7/2018	0.471816	0.266968	0	0	2.11452	1.66427	0	1	0.288097	0.18368	3	0	10.5121	29.6034	0	1	0.327	0.282262	1	0	2.13069	2.21628	0	0	0.0755032	0.0974221	0	0	1.06536	1.13519	0	0	0.765537	0.85892	0	0	0.766277	0.979728	0	0
29/7/2018	0.514821	0.296196	0	0	1.49283	2.12385	0	1	0.843248	0.179592	1	0	13.7727	29.3779	0	0	0.342359	0.192648	1	1	2.06085	1.94816	0	0	0.0723573	0.0942494	0	0	1.01125	1.17513	0	0	0.77584	0.858367	0	0	0.751191	0.928361	0	0
30/7/2018	0.57503	0.294416	0	0	1.5454	2.20708	0	1	1.12616	0.177854	0	0	7.63248	29.6389	2	1	0.350757	0.199503	1	1	2.29382	1.89276	0	0	0.0638395	0.0902646	0	0	0.89584	1.11019	1	0	0.757365	0.896134	0	0	0.73242	0.965699	0	0
31/7/2018	0.580386	0.706161	0	1	0.865995	2.1751	1	1	1.04269	0.181594	0	1	6.39043	29.4888	2	0	0.335284	0.187278	3	0	2.54437	2.08716	0	0	0.0544431	0.086621	0	0	1.238	1.10472	0	0	0.617733	0.97857	0	0	0.823845	0.94914	0	0
1/8/2018	0.661725	0.584434	0	1	1.42692	2.17179	0	1	1.01872	0.171917	0	0	6.56677	26.916	0	0	0.309268	0.269637	2	1	2.31266	1.99958	0	0	0.050347	0.0835063	0	0	1.22528	0.983809	0	0	0.577218	0.751527	0	0	0.801609	0.963823	0	0
2/8/2018	0.618895	0.526618	1	2	1.46912	1.03691	0	1	1.08851	0.178276	0	0	11.7705	26.3284	0	2	0.323482	0.281011	1	0	2.34047	1.70265	0	0	0.0461331	0.0782864	0	0	1.12381	0.904169	0	0	0.810011	0.736845	0	0	0.843553	0.87131	0	0
3/8/2018	0.766	0.595368	0	1	1.25447	1.25176	0	1	1.38093	0.210456	0	0	8.49035	31.614	1	1	0.397638	0.270802	1	0	2.30817	2.03568	0	0	0.0460101	0.0744428	0	0	1.19621	0.9901	0	0	0.794591	0.745014	0	0	0.809571	0.781956	0	0
4/8/2018	0.554963	0.621564	1	1	0.962318	2.04359	0	1	1.35533	0.232396	0	0	9.74042	33.3009	1	1	0.446516	0.345827	0	0	2.20966	2.0087	0	0	0.0428656	0.0687488	0	0	1.23797	0.969048	0	0	0.982842	0.711047	0	0	0.907357	0.874643	0	0
5/8/2018	0.538078	0.557705	1	0	2.16487	2.18829	1	0	0.948126	0.167796	0	0	10.2578	32.9098	1	1	0.454659	0.369154	0	0	2.2367	2.03287	0	1	0.0370642	0.0640877	0	0	1.23096	1.02357	0	0	0.791565	0.64292	0	0	0.907695	0.838137	0	0
6/8/2018	0.608718	0.499042	1	0	2.34575	2.41352	0	1	0.884044	0.174282	0	0	12.7437	33.6528	1	0	0.44216	0.301837	1	1	2.4741	2.18139	0	0	0.0376942	0.0668425	0	0	1.33141	0.869229	0	0	0.742217	0.582663	0	0	0.895865	0.917951	0	0
7/8/2018	0.547121	0.496064	0	0	1.27354	2.50049	0	0	1.12293	0.209278	0	0	7.91202	34.1409	2	0	0.338442	0.322738	2	1	2.44959	2.08812	0	0	0.0368367	0.0674539	0	0	1.31571	0.868525	0	0	0.758246	0.625026	0	0	0.872862	0.926458	0	0
8/8/2018	0.602585	0.563115	0	0	1.06296	3.19718	1	0	0.975114	0.257185	0	0	6.6152	34.5062	4	1	0.320962	0.310701	2	0	2.60721	1.97492	0	1	0.0356637	0.0651982	0	0	1.38189	0.890247	0	0	0.691714	0.602388	0	0	0.677567	0.922715	0	0
9/8/2018	0.383458	0.325223	1	0	1.22953	3.28588	0	0	0.561789	0.258255	0	0	7.59596	34.5766	3	1	0.330101	0.278957	0	1	2.30842	1.7988	0	1	0.0365799	0.0596109	0	0	1.37953	0.95312	0	0	0.669087	0.64539	0	0	0.70888	0.919051	0	0
10/8/2018	0.807672	0.35189	0	0	1.42364	3.28025	0	0	0.369102	0.286658	0	0	7.91558	31.2911	3	1	0.2403	0.269977	2	1	2.13968	1.7817	0	0	0.0354504	0.0587134	0	0	1.22494	0.972901	0	0	0.684606	0.648201	0	0	0.715282	0.917309	0	0
11/8/2018	0.886661	0.277739	0	1	1.01086	2.14294	0	1	0.485203	0.287663	0	1	6.28624	27.9681	4	1	0.242909	0.263884	2	1	2.24132	1.72311	0	0	0.0337587	0.057877	0	0	1.85032	1.24256	0	0	0.677335	0.642936	0	0	0.72622	0.887656	0	0
12/8/2018	0.710579	0.271195	0	0	0.999057	2.25386	0	1	0.59868	0.282587	0	0	6.20593	34.8605	4	1	0.259589	0.278164	0	0	2.33333	1.73977	0	0	0.0343869	0.0532989	0	0	1.94435	1.1672	0	0	0.714786	0.557133	0	0	0.72558	0.853494	0	0
13/8/2018	0.565315	0.379783	0	0	1.34893	2.39864	0	1	0.530682	0.235754	0	0	5.24558	36.2187	1	1	0.309842	0.28653	1	0	2.38715	1.7114	0	0	0.0348722	0.0574021	0	0	1.10574	1.05643	0	0	0.737659	0.52882	0	1	0.683118	0.898869	0	0
14/8/2018	0.505334	1.27645	0	0	1.30468	2.34864	0	0	0.58598	0.196118	0	1	5.44527	39.8741	1	0	0.276146	0.270377	0	1	2.45131	1.54225	0	0	0.0364918	0.0559336	0	0	1.15565	0.971468	0	0	0.752018	0.514399	0	0	0.697371	0.908837	0	0
15/8/2018	0.563933	0.257336	0	0	1.84276	2.13194	0	0	0.559453	0.221644	0	1	5.41322	35.6229	2	0	0.269613	0.287721	1	0	2.41582	1.53932	0	0	0.0372555	0.0524346	0	0	1.48465	0.975919	0	0	0.702178	0.506834	0	1	0.709872	0.929568	0	0
16/8/2018	0.624566	0.328767	0	0	1.83807	3.34178	1	0	0.628185	0.228233	0	1	5.09734	34.0396	2	1	0.283613	0.2824	1	0	2.37977	1.69371	0	0	0.0376506	0.0537399	0	0	1.27765	0.967456	1	0	0.732055	0.527029	0	0	0.728188	0.966056	0	0
17/8/2018	0.612977	0.450731	0	0	1.83523	2.05913	1	1	0.279924	0.205888	0	2	9.19671	32.9025	1	1	0.269971	0.288302	1	0	2.55119	1.89212	0	0	0.0368474	0.0527229	0	0	1.39193	0.945633	1	0	0.664436	0.555784	0	0	0.746278	1.04101	0	0
18/8/2018	0.423887	1.53174	0	0	1.76537	2.15442	1	1	0.232883	0.20537	0	2	7.62821	42.1627	2	0	0.269962	0.287128	1	0	2.01965	1.65867	0	0	0.0396053	0.0536483	0	0	1.44032	1.2514	0	0	0.791067	0.595635	0	0	0.77283	1.01758	0	0
19/8/2018	0.496262	0.357642	0	0	1.91623	1.24871	0	2	0.240783	0.171039	0	2	4.49592	40.2505	3	0	0.273106	0.289532	1	0	2.04075	2.01919	0	0	0.0402431	0.0570339	0	0	1.3961	1.5766	0	0	0.692647	0.63574	0	0	0.793653	1.00449	0	0
20/8/2018	0.470691	0.331676	0	2	1.73884	0.926069	0	1	0.198901	0.132767	0	1	4.78293	37.1481	3	1	0.266246	0.289015	1	0	2.2972	2.00763	0	0	0.0366031	0.0566896	0	0	1.41565	1.479	0	0	0.700785	0.571573	0	0	0.754612	1.00761	0	0
21/8/2018	0.406181	0.316954	0	0	1.3724	0.824088	0	1	0.188699	0.143537	1	1	5.5546	33.5928	2	0	0.247417	0.271495	1	0	2.31546	2.17809	0	0	0.0354333	0.0543016	0	0	1.46285	1.39069	0	0	0.715881	0.496982	0	0	0.667942	0.997644	0	0
22/8/2018	0.421558	0.320605	1	0	1.11994	0.799399	0	0	0.169462	0.129304	2	1	2.37025	32.1928	2	0	0.241682	0.289138	1	0	2.29078	2.14237	0	0	0.0411323	0.0492109	0	0	1.36268	1.44538	0	0	0.648689	0.620586	0	0	0.6616	1.00266	0	0
23/8/2018	0.51626	0.338177	0	0	1.09174	0.791605	0	0	0.177808	0.1552	1	0	2.01503	23.907	3	1	0.244591	0.280794	1	0	2.29675	2.54484	0	0	0.0354893	0.0490355	0	0	1.49479	1.35659	0	0	0.635966	0.55773	0	0	0.651888	0.977888	0	0
24/8/2018	0.639126	0.365018	0	0	1.24427	0.743016	0	0	0.0752216	0.148275	1	0	11.1166	23.0648	2	0	0.239499	0.299328	0	0	2.32947	2.65796	0	0	0.0374087	0.0490746	0	0	1.56091	1.2287	0	0	0.495613	0.558493	0	0	0.689258	0.937507	0	0
25/8/2018	0.498264	0.460785	0	0	1.55388	0.594427	0	0	0.0737768	0.122229	1	0	7.84986	23.1781	4	0	0.226391	0.28298	0	0	2.1724	2.69598	0	0	0.0350038	0.048534	0	0	1.59219	1.30718	0	0	0.575462	0.542626	0	0	0.667802	0.91816	0	0
26/8/2018	0.424435	0.373638	0	0	1.35677	0.754839	0	0	0.0882176	0.130196	2	1	7.73064	27.2163	4	0	0.230483	0.291565	0	0	2.12485	2.6176	0	0	0.032262	0.0464521	0	0	1.67623	1.18861	0	0	0.552203	0.580884	0	0	0.714708	0.930745	0	0
27/8/2018	0.362333	0.367081	1	0	2.11117	0.918514	0	0	0.117845	0.136798	1	1	6.01398	30.011	3	0	0.206125	0.253874	1	1	2.112	2.49781	0	0	0.0314844	0.0426461	0	0	1.04924	1.29546	0	0	0.545054	0.571124	0	0	0.718645	0.921804	0	0
28/8/2018	0.294528	0.440783	0	0	1.57742	0.976366	1	0	0.114335	0.151213	0	1	2.35164	25.8094	3	0	0.222472	0.280474	0	1	2.02067	2.41411	0	0	0.0300753	0.0342968	0	0	1.10503	1.32333	0	0	0.518309	0.579764	0	0	0.713977	0.949343	0	0
29/8/2018	0.313792	0.445007	0	0	1.72284	0.919173	0	0	0.126465	0.159353	0	1	2.26973	24.6438	2	0	0.246278	0.304932	1	0	2.15566	2.22882	0	0	0.0270666	0.0349736	0	0	0.908048	1.30615	0	0	0.614728	0.546444	0	0	0.726942	0.941414	0	0
30/8/2018	0.238611	0.487247	0	0	1.60548	1.01443	0	0	0.145216	0.116267	0	1	4.9682	9.79465	2	2	0.218654	0.296492	1	0	2.0258	1.94036	0	0	0.0264009	0.0359675	0	0	1.166	1.26167	0	0	0.594681	0.543436	0	0	0.725105	0.931969	0	0
31/8/2018	0.214549	0.467905	0	0	1.49708	0.906119	1	0	0.152303	0.111239	0	2	1.83116	7.66951	0	1	0.208822	0.285089	1	0	1.88803	2.08334	0	0	0.0257743	0.0371828	0	0	0.920461	1.35945	0	0	0.624056	0.78539	0	0	0.742406	0.935117	0	0
1/9/2018	0.197248	0.486938	1	0	0.846768	0.805077	0	0	0.190481	0.108306	0	2	1.09497	6.31637	1	0	0.215628	0.284248	1	0	1.53626	2.21645	0	0	0.0287201	0.0397174	0	0	0.932424	1.31602	0	0	0.620251	0.798073	0	0	0.747332	0.9296	0	0
2/9/2018	0.229154	0.418798	0	0	0.688087	1.08163	0	0	0.28209	0.11784	1	1	1.23644	4.84487	2	2	0.222552	0.275339	1	0	1.66871	2.06886	0	0	0.0335433	0.0498706	0	0	1.19279	1.38786	0	0	0.600081	0.870089	0	0	0.746914	0.904946	0	0
3/9/2018	0.232181	0.390677	0	0	0.860903	0.766375	0	0	0.310539	0.12968	0	1	2.19009	8.33357	1	2	0.248249	0.255372	0	0	1.69237	2.00703	0	0	0.0391647	0.0516846	0	0	1.11698	1.32554	0	0	0.585114	0.86847	0	0	0.728155	0.927552	0	0
4/9/2018	0.470098	0.689365	0	0	0.946874	0.784942	0	0	0.292441	0.122962	0	1	4.42177	8.31476	0	2	0.240688	0.265853	0	0	2.09844	1.43297	0	0	0.03671	0.0551503	0	0	1.27177	1.33564	0	0	0.52187	0.841346	0	0	0.696467	0.892925	0	0
5/9/2018	0.243428	0.844906	0	0	0.917886	0.515325	0	0	0.275202	0.124767	0	1	5.99583	9.29576	1	0	0.225864	0.257315	1	0	2.10333	1.56039	0	0	0.033411	0.0566947	0	0	1.20872	1.33339	0	0	0.49235	0.623082	0	0	0.685237	0.887485	0	0
6/9/2018	0.275827	0.834555	0	0	1.86567	0.814106	0	0	0.288833	0.117368	0	1	5.82019	9.63494	1	1	0.254185	0.269829	1	0	2.35495	1.7083	0	0	0.0361234	0.059561	0	0	1.1942	1.39439	0	0	0.509091	0.650777	0	0	0.682202	0.88737	0	0
7/9/2018	0.299238	0.817077	1	0	1.95149	0.800517	0	0	0.300653	0.115661	0	1	5.90064	10.1139	1	1	0.236298	0.274386	1	0	2.36219	1.80828	0	0	0.0373941	0.0632865	0	0	1.16904	1.39676	0	0	0.463536	0.900563	0	0	0.703272	0.938123	0	0
8/9/2018	0.41333	0.820372	0	0	1.77291	0.79092	1	0	0.28762	0.154876	0	0	9.57453	9.06572	1	1	0.318697	0.260964	1	0	2.52187	1.85388	0	0	0.0506883	0.066414	0	0	1.37367	1.6472	0	0	0.453701	0.695448	0	0	0.704411	0.924808	0	0
9/9/2018	0.373175	0.785229	0	0	1.70541	0.357117	0	0	0.233854	0.1402	0	0	10.4699	8.47818	0	1	0.347766	0.26284	0	0	2.47153	1.87642	0	0	0.0635909	0.0682965	0	0	1.33696	1.42409	0	0	0.430778	0.708318	0	0	0.738197	0.884668	0	0
10/9/2018	0.371097	0.817006	0	0	1.16389	0.310129	1	1	0.250114	0.139139	0	0	9.29503	8.5464	0	1	0.348376	0.27173	0	0	2.34139	2.17807	0	0	0.080925	0.074246	0	0	1.25411	1.37092	0	0	0.464346	0.614519	0	0	0.775855	0.868427	0	0
11/9/2018	0.338518	0.509183	0	0	1.24273	0.285727	1	1	0.234959	0.157459	0	0	6.6175	19.2121	0	1	0.327518	0.2967	0	0	2.08945	1.96673	0	0	0.0888229	0.0773021	0	0	1.18885	1.26522	0	0	0.493885	0.601902	0	0	0.786935	0.824336	0	0
12/9/2018	0.306133	0.73765	0	0	1.42011	0.302478	1	1	0.225042	0.119288	0	0	6.4015	23.5483	0	0	0.282114	0.297352	0	0	1.84535	1.81239	0	0	0.0987728	0.0836231	0	0	1.24526	1.28423	0	0	0.505599	0.591506	0	0	0.771547	0.754055	0	0
13/9/2018	0.306735	0.458618	0	0	1.39541	0.308646	0	0	0.242098	0.114385	0	1	6.55025	18.3989	1	0	0.250113	0.292929	0	0	1.76779	1.97212	0	0	0.0966035	0.0893329	0	0	1.35157	1.25401	0	0	0.513271	0.638543	0	0	0.778325	0.797048	0	0
14/9/2018	0.288454	0.57343	0	0	1.27398	0.377336	0	0	0.248977	0.11699	0	1	12.7109	9.91116	1	1	0.285772	0.296941	0	0	1.69267	1.95149	0	0	0.101915	0.0972975	0	0	1.23925	1.25491	1	0	0.503543	0.521237	0	0	0.734785	0.835952	0	0
15/9/2018	0.30712	0.548336	0	0	1.29302	0.298418	1	0	0.233165	0.112824	0	1	11.212	11.0195	1	2	0.291492	0.293926	0	0	1.63994	2.01048	0	0	0.10734	0.103091	0	0	1.13959	1.27438	0	0	0.509064	0.82384	0	0	0.750869	0.871461	0	0
16/9/2018	0.280239	0.536084	0	0	1.34292	0.314509	0	1	0.21997	0.100574	0	1	15.6348	17.6416	2	2	0.282776	0.299834	0	0	1.61012	2.09288	0	0	0.109691	0.111661	0	0	1.00781	1.30779	0	0	0.552412	0.96521	0	0	0.779418	0.890207	0	0
17/9/2018	0.268348	0.432914	0	1	1.38692	0.710405	0	0	0.198938	0.10839	0	0	11.3657	8.30555	2	2	0.278778	0.30143	0	0	1.88377	2.11531	0	0	0.115974	0.109358	0	0	1.32198	1.18362	0	0	0.536409	0.634388	0	0	0.784357	0.924995	0	0
18/9/2018	0.291266	0.482475	0	1	1.38853	0.582392	0	0	0.226352	0.109213	0	0	11.5654	8.48014	1	1	0.2657	0.318892	0	0	1.79457	2.089	0	0	0.122148	0.107031	0	0	1.58963	1.125	0	0	0.558693	0.766629	0	0	0.781971	0.912705	0	0
19/9/2018	0.312091	0.362696	0	1	1.56679	0.83343	0	0	0.158328	0.115212	0	0	12.7607	8.20822	0	2	0.252598	0.313718	0	0	1.53386	2.1528	0	0	0.0884191	0.113565	0	0	1.22941	1.21863	0	0	0.54569	0.678673	0	0	0.770289	0.952317	0	0
20/9/2018	0.249285	0.38957	0	0	1.60507	0.724159	0	0	0.17392	0.110405	0	0	17.8678	10.4797	0	0	0.258427	0.305474	0	0	1.80267	2.17229	0	0	0.102157	0.112389	0	0	1.06497	1.21482	0	0	0.660993	0.702468	0	0	0.774626	0.917567	0	0
21/9/2018	0.443534	0.396276	0	0	1.05219	0.806788	0	0	0.203214	0.1204	0	0	8.67505	14.9801	0	1	0.272789	0.313928	0	0	1.77517	2.02395	0	0	0.122228	0.119352	0	0	1.47065	1.29547	0	0	0.658846	0.811956	0	0	0.735865	0.921644	0	0
22/9/2018	0.489294	0.511334	0	0	1.40819	0.735981	0	0	0.210312	0.191032	0	0	8.04925	14.8108	0	2	0.252822	0.314581	0	0	2.03677	2.33026	0	0	0.13438	0.128879	0	0	1.23364	1.28589	0	0	0.660329	0.675439	0	0	0.75093	0.869727	0	0
23/9/2018	0.32591	0.746131	0	0	1.44171	0.273099	0	0	0.219669	0.203804	0	1	7.56796	17.7039	0	1	0.288654	0.322778	0	0	2.27625	2.71438	0	0	0.143833	0.148277	0	0	1.30159	1.37602	0	0	0.638099	0.596636	0	0	0.764354	0.894628	0	0
24/9/2018	0.521106	0.580854	0	0	1.35243	0.354341	0	0	0.238894	0.209887	0	2	11.8651	5.87497	1	0	0.288975	0.308512	0	0	2.30619	3.20099	0	0	0.150494	0.156308	0	0	1.36083	1.58312	0	0	0.61626	0.59794	0	0	0.868399	0.893235	0	0
25/9/2018	0.319223	0.383124	1	0	1.46914	0.384526	0	1	0.17645	0.2854	0	1	7.27775	6.4616	2	0	0.29971	0.315388	0	0	2.30088	2.98348	0	0	0.166845	0.162063	0	0	1.12151	1.12998	0	0	0.547092	0.578858	0	0	0.894168	0.926835	0	0
26/9/2018	0.403805	0.353654	0	0	1.71465	0.358286	0	2	0.194234	0.227136	0	2	6.69719	8.86689	0	0	0.296745	0.336062	1	0	2.21116	2.83676	0	0	0.179478	0.171608	0	0	1.0456	1.04771	0	0	0.552955	0.589008	0	0	0.84493	0.93047	0	0
27/9/2018	0.388552	0.808579	0	0	1.39881	0.430915	0	0	0.132189	0.284407	0	1	6.39562	6.35412	0	1	0.283845	0.348571	1	0	2.30449	2.74871	0	0	0.184525	0.141703	0	0	0.935826	0.934465	0	0	0.665439	0.608925	0	0	0.853692	0.937122	0	0
28/9/2018	0.433962	0.812206	0	0	0.961738	0.526768	0	0	0.134633	0.265468	0	1	6.27058	11.4313	0	0	0.26795	0.358455	1	0	2.10095	2.10706	0	0	0.218637	0.153289	0	0	0.774004	1.12158	0	0	0.689147	0.57474	0	0	0.860465	0.920123	0	0
29/9/2018	0.261627	0.833185	0	0	1.01421	0.763561	0	0	0.150619	0.175026	0	0	6.09312	11.9997	0	0	0.298193	0.443046	0	0	2.19132	1.87185	0	0	0.228158	0.166001	0	0	0.830505	1.09175	0	0	0.587984	0.668552	0	0	0.865293	0.9176	0	0
30/9/2018	0.401525	0.608464	0	0	0.774383	0.77754	0	0	0.11177	0.202344	1	0	9.56631	6.46377	0	1	0.289065	0.462456	0	0	2.26155	2.00876	0	0	0.242306	0.190796	0	0	1.10513	1.11308	0	0	0.591201	0.674944	0	0	0.911844	0.891603	0	0
1/10/2018	0.37637	0.548459	0	0	0.899916	0.742696	0	0	0.126454	0.205981	1	0	6.82661	5.55626	0	1	0.291988	0.439431	0	0	2.20428	1.98597	0	0	0.188215	0.196289	0	0	1.17683	1.16256	0	0	0.680322	0.745715	0	0	0.825483	0.878908	0	0
2/10/2018	0.365425	0.522208	0	0	0.864535	0.36646	0	0	0.141585	0.203168	0	0	14.7468	16.0242	1	1	0.303007	0.460523	0	0	2.11102	2.00502	0	0	0.200449	0.161319	0	0	1.20563	1.19107	0	0	0.686662	0.757708	0	0	0.833935	0.860494	0	0
3/10/2018	0.365956	0.453395	0	0	0.761376	0.642821	0	0	0.146918	0.204805	1	0	9.79528	10.8644	0	2	0.289017	0.463491	0	0	2.28955	2.17977	0	0	0.171865	0.180914	0	0	1.18884	1.18869	0	0	0.658046	0.665321	0	0	0.78406	0.919942	0	0
4/10/2018	0.347835	0.483704	0	0	0.875494	0.713439	0	0	0.177916	0.382238	1	0	11.3413	13.3447	2	2	0.304175	0.556737	0	0	2.62366	2.25157	0	0	0.191333	0.152943	0	0	1.17004	1.20896	0	0	0.614733	0.692973	0	0	0.849353	0.932333	0	0
5/10/2018	0.45897	0.482786	0	0	0.793332	0.698073	0	1	0.233501	0.173165	1	0	19.3083	14.7258	1	2	0.304577	0.556667	0	0	2.59046	2.31547	0	0	0.273019	0.163926	0	0	1.28888	1.24847	0	0	0.654099	0.650351	0	0	0.857728	0.926416	0	0
6/10/2018	1.12387	0.663993	0	0	0.751561	0.724714	0	1	0.228716	0.276941	1	0	29.3932	16.3869	1	2	0.302637	0.50838	0	0	2.63558	2.17048	0	0	0.287104	0.134607	0	0	1.1872	1.3472	0	0	0.533707	0.759207	0	0	0.827845	0.92994	0	0
7/10/2018	0.36139	0.576539	0	0	0.733308	0.739723	0	2	0.361006	0.365819	1	0	30.2077	21.5165	1	1	0.305972	0.510201	0	0	2.51224	2.36905	0	0	0.248637	0.146455	0	0	1.10712	1.05685	0	0	0.508917	0.785907	0	0	0.848509	0.951847	0	0
8/10/2018	0.33717	0.578313	0	0	0.66965	0.911128	0	2	0.332551	0.420462	0	0	23.9519	18.0797	0	1	0.295807	0.462116	0	0	2.68415	2.22775	0	0	0.248038	0.160716	0	0	1.00535	1.10964	1	0	0.618241	0.715136	0	0	0.891294	0.971566	0	0
9/10/2018	0.327385	0.51877	0	0	0.705703	0.795674	0	2	0.292279	0.294406	0	0	28.2105	12.719	0	3	0.289562	0.482391	0	0	2.55201	2.50432	0	0	0.248697	0.196103	0	0	0.947743	1.12225	1	0	0.55194	0.762872	0	0	0.899544	0.977492	0	0
10/10/2018	0.350169	0.516601	1	0	0.623144	0.902935	0	1	0.276283	0.215707	0	0	29.6041	15.5191	0	2	0.414688	0.482181	0	0	2.81731	3.36226	0	0	0.25625	0.201311	0	0	1.06725	1.00831	0	0	0.617248	0.756671	0	0	0.948066	0.990202	0	0
11/10/2018	0.293881	1.21087	0	0	0.666855	0.855815	0	0	0.258469	0.227216	2	0	34.8638	47.896	0	1	0.383096	0.586631	0	0	2.64056	2.91343	0	0	0.404059	0.204374	0	0	1.24856	0.929883	0	0	0.643087	0.786752	0	0	0.947372	0.930508	0	0
12/10/2018	0.310269	1.22117	0	0	0.662665	0.870841	0	0	0.24409	0.195956	0	0	39.9505	24.2829	1	2	0.307129	0.583507	0	0	2.32782	2.82176	0	0	0.355154	0.283038	0	0	1.08024	0.998315	0	0	0.66302	0.771574	0	0	0.960365	0.904425	0	0
13/10/2018	0.371933	0.54613	0	0	0.896078	0.52591	0	2	0.203898	0.157038	0	0	42.9342	21.3851	0	3	0.311954	0.582487	0	0	3.38398	3.08203	0	0	0.294917	0.358441	0	0	1.07785	1.26857	0	0	0.624022	0.856802	0	0	0.949425	0.960402	0	0
14/10/2018	0.827934	0.451157	0	0	1.27836	0.701265	0	1	0.172937	0.234003	0	0	37.1409	24.343	1	2	0.278889	0.589162	0	0	3.62379	2.50571	0	0	0.259462	0.362682	0	0	1.03982	1.25941	1	0	0.94226	0.819323	0	0	0.915514	0.997839	0	0
15/10/2018	0.377984	0.455172	0	0	1.88422	0.657299	0	1	0.640659	0.243569	0	0	33.5529	20.0108	1	2	0.361382	0.603974	0	0	2.30799	2.2347	0	0	0.28181	0.326544	0	0	1.31021	1.41967	0	0	1.05684	0.823368	0	0	0.904651	1.0079	0	0
16/10/2018	0.29857	0.819616	1	0	1.93896	0.512078	0	0	0.832387	0.344147	0	0	49.5356	18.0432	1	2	0.367991	0.604227	0	0	2.29661	2.37264	0	0	0.300992	0.319782	1	0	1.27809	1.56997	0	0	0.706072	0.635458	0	0	0.938475	1.04509	0	0
17/10/2018	0.495016	0.55529	0	0	1.96935	1.79326	0	0	0.706681	0.383125	0	0	42.7854	18.6144	1	1	0.334178	0.569445	0	0	2.94359	2.23071	0	0	0.309815	0.322165	1	0	1.48725	1.5231	0	0	0.623033	0.685048	0	0	0.943866	1.04009	0	0
18/10/2018	0.472188	0.708592	0	1	1.93615	2.33758	0	0	0.696548	0.376057	0	0	30.2849	33.6478	1	0	0.344913	0.577951	0	0	3.05662	2.03014	0	0	0.312238	0.31243	1	0	1.19473	1.57135	0	0	0.520867	0.656704	0	0	0.98894	1.06866	0	0
19/10/2018	0.476263	0.674121	0	1	2.01267	2.37791	0	0	0.709443	0.373462	0	0	31.4513	35.2625	0	0	0.333791	0.576945	0	0	4.45755	2.16535	0	0	0.313388	0.381698	1	0	1.23791	1.71519	0	0	0.967111	0.787724	0	0	0.923237	1.0591	0	0
20/10/2018	0.979777	0.80161	1	1	1.90669	2.08201	1	0	0.595642	0.345041	0	0	30.1693	34.5464	0	0	0.347932	0.581084	1	0	4.71635	2.03876	0	0	0.311462	0.270431	1	1	1.43714	1.73902	0	0	1.0691	0.881857	0	0	0.968765	1.05797	0	0
21/10/2018	1.1177	0.883766	0	0	2.16977	1.85671	2	1	0.526934	0.436224	0	0	29.0189	37.9946	0	0	0.322484	0.552042	0	0	3.41524	2.76049	1	0	0.255983	0.275661	2	1	2.05863	1.69034	0	0	0.55214	0.980319	0	0	1.06135	1.08724	0	0
22/10/2018	1.10185	0.930819	0	0	2.10496	1.92259	2	1	0.541668	0.253797	0	0	26.6195	34.2193	0	0	0.322208	0.547965	0	0	3.81089	2.21717	0	0	0.259033	0.241896	2	1	2.05075	1.91105	0	0	0.568637	1.03311	0	0	1.06272	1.08451	0	0
23/10/2018	1.16014	1.03546	0	0	2.21507	1.94935	2	1	0.374365	0.25028	0	0	28.5421	35.253	0	1	0.421337	0.555129	0	0	3.95732	2.13082	0	0	0.258896	0.3088	2	1	1.95756	2.02485	0	0	0.708016	0.964358	0	0	1.07517	1.10331	0	0
24/10/2018	1.05351	0.769091	0	1	2.84445	3.97452	2	0	0.508598	0.378253	0	0	17.3132	34.54	0	1	0.43394	0.457466	0	0	4.261	2.28557	0	0	0.325741	0.306545	2	1	1.62016	1.95444	0	0	0.828205	1.10686	0	0	1.06929	1.08562	0	0
25/10/2018	0.868675	1.05811	0	1	2.95229	3.79532	1	0	0.236827	0.315986	1	0	20.2696	33.273	0	0	0.404906	0.577175	0	0	3.39963	2.69432	0	0	0.331308	0.307904	2	1	1.45676	1.87973	0	0	0.8062	0.891604	0	0	1.06479	1.15506	0	0
26/10/2018	0.662319	0.72689	1	0	2.72659	3.86522	1	0	0.605251	0.365986	0	0	22.3917	40.6982	0	1	0.425326	0.493592	0	0	2.91119	2.4564	0	0	0.218978	0.375263	2	1	1.38589	2.15539	0	0	0.713934	0.655478	0	0	1.03841	1.12877	0	0
27/10/2018	0.923606	0.753911	0	0	2.30007	3.73044	1	0	0.558918	0.381849	0	0	36.6158	41.1085	0	1	0.463291	0.541227	0	0	3.27862	2.02769	0	0	0.212731	0.445704	2	0	1.47198	2.15465	0	0	0.714217	0.589014	0	1	1.01725	1.1005	0	0
28/10/2018	0.991739	1.19768	0	0	1.55112	3.80347	1	0	0.406185	0.361846	0	0	27.4356	39.3116	1	0	0.469687	0.503181	0	0	3.3006	2.7507	0	0	0.191981	0.431094	1	0	1.3517	2.08361	0	0	0.967047	1.22204	0	0	0.942747	1.14843	0	0
29/10/2018	1.29789	1.11015	0	1	1.38039	1.87593	1	0	0.550287	0.341444	0	0	17.7845	36.277	1	1	0.430161	0.473976	0	0	3.12626	2.7171	0	0	0.191749	0.419528	2	0	1.51143	1.93503	0	0	0.91345	1.27288	0	0	0.954258	1.17392	0	0
30/10/2018	1.24575	1.38877	0	0	1.89682	1.81028	1	0	0.451991	0.313377	1	0	18.1442	41.8943	1	0	0.483632	0.529367	0	0	3.17676	2.06119	0	0	0.190059	0.412056	2	0	1.31726	2.16812	0	0	0.868303	1.16652	0	0	0.962435	1.17083	0	0
31/10/2018	0.618387	1.0383	0	1	1.96846	1.78415	0	0	0.519756	0.270369	1	0	16.6313	45.8965	1	0	0.572067	0.466844	0	0	3.49585	2.23578	0	0	0.256959	0.420007	2	1	1.25269	2.06828	0	0	0.817042	0.913729	0	0	1.07628	1.09711	0	0
1/11/2018	0.471159	2.07759	0	0	1.87588	2.07666	0	1	0.512536	0.272202	1	0	20.5983	42.2489	1	0	0.568841	0.422702	0	0	3.43352	2.26314	0	1	0.188628	0.419863	2	1	1.26947	1.97445	0	0	0.954106	0.725827	0	0	1.03522	1.22884	0	0
2/11/2018	0.401111	1.44199	1	0	1.2929	4.10352	0	1	0.51838	0.259547	1	0	20.4048	41.7859	0	0	0.664205	0.458848	0	0	8.5404	2.54619	1	0	0.322769	0.472332	1	0	1.1779	2.02179	0	0	0.876264	0.63776	0	1	0.961198	1.14525	0	0
3/11/2018	0.660601	1.89232	1	0	1.79678	2.43746	0	1	0.275869	0.33304	1	0	21.8564	57.0812	0	0	0.601258	0.437232	0	0	3.03399	4.14297	0	0	0.569333	0.471912	1	0	1.26849	2.30389	0	0	0.807437	1.03629	0	0	1.0406	1.07818	0	0
4/11/2018	1.20705	1.47112	0	1	2.12977	2.36413	0	2	0.306677	0.399529	0	0	32.7466	43.7262	0	0	0.606392	0.455036	0	0	2.7053	4.24371	0	0	0.506746	0.450926	1	0	1.37675	2.10509	0	0	1.24165	0.764411	0	0	0.995944	1.0992	0	0
5/11/2018	0.538727	1.85778	2	0	2.10827	2.59125	0	0	0.326565	0.351703	1	1	27.3478	33.0265	0	1	0.607595	0.61112	0	0	4.51757	4.31089	0	0	0.624039	0.445993	1	1	1.50289	2.19699	0	0	1.23589	1.03086	0	0	1.03515	1.07305	0	0
6/11/2018	0.410709	3.09465	1	0	2.54493	2.00241	0	1	0.304157	0.374787	0	0	21.9101	53.9905	0	1	0.591839	0.7558	0	0	3.89918	3.52426	0	0	0.569435	0.431369	2	1	1.92883	2.13904	0	0	1.32527	0.944829	1	1	1.00527	1.02257	0	0
7/11/2018	0.511611	2.86715	1	0	2.19487	2.00995	0	0	0.251572	0.381635	2	0	19.5628	48.0254	0	0	0.521107	0.664198	1	0	7.2731	4.75931	0	0	0.565976	0.456766	2	1	2.00215	2.29145	0	0	0.614114	0.826824	0	0	1.00875	1.02993	0	0
8/11/2018	0.988102	1.90182	1	0	2.41165	2.02019	0	0	0.331645	0.38254	1	0	23.9451	43.9668	0	0	0.478715	0.972038	0	0	4.11701	4.5612	0	0	0.560857	0.4464	2	1	1.65813	2.11544	0	0	0.902191	0.822217	0	0	0.935602	0.951445	0	0
9/11/2018	1.0451	1.26722	0	0	2.46487	3.2085	0	0	0.334035	0.447385	0	0	28.5129	45.0864	0	0	0.545986	0.922357	0	0	9.97402	3.51331	0	0	0.558678	0.447388	2	1	1.72492	2.15788	0	0	0.739126	0.714695	0	1	0.898796	0.998231	0	0
10/11/2018	0.625534	0.961203	1	0	3.10558	2.96258	0	0	0.315999	0.38366	0	0	34.8626	50.0625	0	0	0.512733	1.00123	0	0	5.90708	2.20021	0	1	0.552163	0.484249	2	1	1.62465	2.28438	0	0	1.47356	0.762391	0	1	0.906225	1.00169	0	0
11/11/2018	1.0164	0.905833	1	1	2.92013	2.4743	0	0	0.360497	0.356015	0	0	26.7066	48.2205	0	0	0.520447	1.08807	1	0	3.85086	5.25546	0	0	0.314349	0.529412	3	1	1.72242	1.99939	0	0	0.830754	0.754922	0	1	1.01903	1.39967	0	0
12/11/2018	1.22105	2.82351	0	0	3.64712	2.8161	0	0	0.75336	0.361489	0	0	114.847	43.445	0	0	0.689871	1.00805	0	0	4.1914	7.07814	0	0	0.320645	0.520705	2	1	1.32847	2.08695	1	0	0.906419	0.889086	0	0	1.04829	1.28513	0	0
13/11/2018	0.941806	3.3163	0	0	3.4766	4.14846	0	0	0.791562	0.400237	0	0	85.3204	43.2914	0	0	0.730881	0.962978	0	0	5.03314	4.68473	0	0	0.379634	0.51101	2	1	1.23817	2.04435	0	0	1.11685	1.01403	0	0	0.984563	1.31692	0	0
14/11/2018	1.52724	1.75676	0	0	3.08964	6.18066	0	0	0.951462	0.501447	0	0	87.8832	45.1835	0	0	0.568028	1.09852	1	0	5.23206	7.58318	0	0	0.378416	0.544265	2	1	1.25616	1.55503	1	0	1.27328	1.04407	0	0	1.00616	1.38281	0	0
15/11/2018	1.54903	1.44373	0	1	2.82908	5.44972	0	0	0.867927	1.03814	0	0	76.6721	42.6642	0	0	0.633566	1.13326	1	0	5.53072	6.75448	0	1	0.544031	0.545805	0	1	1.34422	1.49386	0	0	1.21974	1.53447	0	0	1.0475	1.44224	0	0
16/11/2018	1.09328	1.3475	0	1	2.50662	4.59711	0	1	0.953953	1.04336	0	0	90.7075	45.094	0	1	0.684218	1.12707	0	1	5.9162	4.03893	0	0	0.54136	0.4913	0	2	1.18941	1.62499	0	0	1.21153	0.876337	0	1	0.938996	1.35992	1	0
17/11/2018	1.4693	1.32417	0	1	2.09993	7.70122	0	1	1.19971	1.23927	0	0	89.5307	45.9748	0	0	0.755505	1.15871	0	0	7.74307	3.27193	0	0	0.451874	0.510475	1	2	1.21889	1.4423	0	0	1.32477	0.82939	0	1	0.936492	0.924308	0	0
18/11/2018	1.33719	1.6103	0	2	3.31085	8.36424	0	0	0.970294	1.31268	0	0	80.6179	55.5039	0	0	0.736342	1.13552	0	0	6.73262	3.39805	0	0	0.46769	0.530068	1	1	1.34023	1.82733	0	0	1.21561	0.760801	0	1	1.05139	0.874565	0	0
19/11/2018	1.31393	4.35579	0	0	3.39544	7.16952	0	0	0.630547	1.35351	0	0	79.1586	85.3079	0	0	0.748093	1.20138	0	0	4.71662	3.71751	0	0	0.45463	0.534259	1	1	1.22077	1.77579	0	0	1.24408	0.939782	0	0	1.05021	0.937371	0	0
20/11/2018	1.45367	3.81497	0	1	3.10592	6.99298	0	0	0.83436	0.540019	0	0	78.9682	84.8695	0	0	0.845584	1.19851	0	0	7.56813	4.11164	0	0	0.532504	0.546307	0	1	1.3775	1.69131	0	0	1.3473	1.34777	0	0	0.933072	1.0016	0	0
21/11/2018	2.05343	4.09413	0	0	2.89897	7.89374	0	0	0.920343	0.661888	0	0	75.7057	88.4741	0	0	0.837607	1.308	1	0	8.85255	3.7485	0	1	0.544578	0.570671	0	1	1.53725	1.48251	1	0	1.25155	1.36219	0	0	0.944157	1.15288	0	0
22/11/2018	2.0372	2.0555	0	0	2.91057	6.73114	1	0	0.799543	0.796121	1	0	69.5015	75.8235	0	0	1.03253	1.25775	0	0	5.00463	7.0644	1	0	0.563124	0.615403	0	1	1.62232	1.34347	1	0	0.702001	1.3516	1	0	0.891714	1.16276	0	0
23/11/2018	3.33573	1.56065	0	1	3.82573	5.40852	0	0	0.815059	1.36868	1	0	88.442	53.8484	0	0	0.881678	1.32357	0	0	4.1849	9.85842	0	0	0.525516	0.661376	0	1	1.52128	1.63936	0	0	0.740968	0.738552	0	0	0.899629	1.21141	0	0
24/11/2018	2.20587	1.3245	0	0	4.34012	5.15291	1	0	0.883053	1.45458	1	0	92.1835	53.328	0	0	1.19043	1.37154	0	0	3.77375	9.29461	1	0	0.465664	0.653958	0	1	2.0304	1.48588	0	0	0.86338	0.900582	0	0	1.00089	1.28761	0	0
25/11/2018	3.45254	1.51426	0	0	4.50848	6.46897	0	0	0.769048	0.85889	0	0	98.7364	45.2831	0	0	1.14673	1.43608	0	0	3.70989	9.635	0	0	0.602464	0.707975	0	1	2.25815	1.51629	0	0	0.905808	0.718527	1	1	1.05778	1.50924	0	0
26/11/2018	2.01247	2.12282	1	0	6.33001	6.27139	0	0	1.03317	0.78933	0	0	99.3708	45.5692	0	0	1.08288	1.41288	0	0	3.08117	9.14804	0	0	0.544945	0.727591	0	0	1.98419	1.88368	0	0	0.864517	1.04544	0	2	1.08614	1.49711	0	0
27/11/2018	2.20828	1.36114	0	0	5.88147	6.75742	0	0	1.11577	1.16379	0	0	96.4487	45.7096	0	0	1.16171	1.51244	0	0	3.60221	7.55415	0	0	0.629825	0.837863	0	0	2.27442	1.8053	0	0	1.15593	1.06433	0	1	1.12289	1.42755	0	0
28/11/2018	2.4438	2.34281	0	0	6.67349	6.47014	0	0	1.10098	1.29582	0	0	95.6728	57.8201	0	0	1.39525	1.66457	0	0	4.0171	7.61711	0	0	0.60454	0.843465	0	0	2.17705	1.4465	0	0	1.13741	1.27637	0	0	1.11325	1.40144	0	0
29/11/2018	1.6689	1.62603	0	0	6.88358	6.46998	0	0	1.08642	1.27481	0	0	95.0252	54.1771	0	0	1.48091	1.68366	0	0	4.74985	4.37885	0	0	0.602503	0.833782	0	0	2.03505	1.4414	0	0	1.23341	1.12834	0	0	1.12937	1.34145	0	0
30/11/2018	1.46988	3.16945	1	0	6.92678	6.43127	0	0	1.1475	1.18081	0	0	90.5123	57.2591	0	0	1.60769	1.59765	0	0	3.80443	5.94665	0	0	0.60861	0.810082	0	0	1.94396	1.65011	0	0	0.915962	1.17608	0	0	1.13053	1.29082	0	0
1/12/2018	1.43336	1.42144	1	1	7.43704	7.6192	0	0	1.12908	1.1044	1	0	90.3253	55.4525	0	0	1.62292	1.8662	0	0	3.31152	5.71318	0	0	0.603619	0.809023	0	0	2.41415	1.74521	0	0	0.863433	1.09908	1	0	1.17907	1.19895	0	0
2/12/2018	1.48924	2.72091	0	0	7.52643	8.77056	0	0	1.035	2.65903	1	0	79.1888	70.1824	0	0	1.64586	1.97356	0	0	3.88739	4.5447	0	0	0.576537	0.803718	0	0	2.34384	1.91743	0	0	1.02797	1.05193	1	0	1.17813	1.17988	0	0
3/12/2018	1.48196	1.96662	0	0	8.20242	9.11767	0	0	1.19952	2.44365	0	0	81.7797	69.5551	0	0	1.94581	2.35538	0	0	5.4428	5.01585	0	1	0.623814	0.798382	0	0	2.39831	1.81279	0	0	0.88376	1.01095	1	0	1.15177	1.08706	0	0
4/12/2018	1.37289	1.78305	0	0	8.10774	9.31176	0	0	1.23993	2.68797	0	0	63.5567	55.6048	0	0	1.98466	2.16077	0	0	7.44539	5.26137	1	0	0.692747	0.804371	0	0	2.20757	1.66795	0	0	0.873899	1.09866	1	0	1.1586	1.22939	0	0
5/12/2018	1.53556	2.0092	0	0	6.87811	8.37007	0	1	1.18424	2.66748	0	0	73.9109	55.8975	0	0	2.12534	2.64348	0	0	4.67093	5.60107	0	0	0.677011	0.810043	0	0	2.27413	2.60129	0	0	0.989879	1.11133	0	0	1.13303	1.22074	0	0
6/12/2018	1.60024	2.3007	0	0	6.31141	8.90397	0	0	0.771668	2.62454	0	0	68.251	61.1035	0	0	1.96898	2.53047	0	0	5.13649	5.02439	0	0	0.748923	0.845417	0	0	2.5549	2.68602	0	0	0.999923	1.13427	0	0	1.12217	1.12054	0	0
7/12/2018	1.6073	1.7742	0	0	7.48525	9.20425	0	1	1.0187	3.4273	0	0	77.9443	50.889	0	0	2.2038	3.03599	0	0	6.40874	4.84194	0	0	0.624289	0.842508	0	0	2.51529	3.172	0	0	0.928488	0.998587	0	0	1.17898	1.242	0	0
8/12/2018	1.55918	1.85046	0	0	7.82974	9.34195	0	1	0.996153	3.80198	1	0	77.3794	56.6107	0	0	2.07499	3.07151	0	0	5.60028	5.81694	0	0	0.69069	0.842735	0	0	2.46342	3.70708	0	0	1.08762	1.15563	0	0	1.20474	1.20466	0	0
9/12/2018	1.97142	1.89148	0	0	6.56629	6.32894	0	1	0.973585	3.90968	1	0	73.8912	55.2454	0	0	2.4248	2.44634	1	0	5.48788	4.74028	0	1	0.697698	0.831616	0	0	2.75626	3.25768	0	0	0.715716	1.29426	0	0	1.20725	1.10642	0	0
10/12/2018	2.01828	1.87142	0	0	6.77619	6.53254	0	1	1.05595	3.96478	0	0	66.2471	51.5375	0	1	3.04504	4.0235	1	0	4.46567	9.94892	0	1	0.689709	0.828592	0	0	2.6701	3.45696	0	0	0.729977	1.40054	0	0	1.19004	1.12196	0	0
11/12/2018	1.14511	2.30971	0	1	6.36629	9.53594	0	1	1.11474	3.5993	1	0	56.1814	51.7574	1	1	3.47097	3.92522	0	0	7.03753	8.91984	0	0	0.640434	0.837886	0	0	2.44376	3.67381	0	1	0.681732	1.55784	1	0	1.16591	1.21494	0	0
12/12/2018	1.05254	1.75738	0	1	6.67544	9.54618	0	2	1.11457	3.53358	1	0	46.8071	46.059	1	1	3.49317	3.80792	0	0	12.6374	9.18814	0	0	0.645529	0.816238	0	0	2.33109	2.28363	0	1	0.83655	1.53504	0	0	1.15841	1.20807	0	0
13/12/2018	1.01427	1.64164	1	1	6.73516	6.92215	0	1	1.04046	3.98209	1	0	43.8841	48.0014	1	0	3.56129	4.3051	0	0	10.8851	10.5807	0	0	0.649605	0.808156	0	0	1.61793	2.17165	0	0	0.649499	1.49424	0	0	1.12334	1.20456	0	0
14/12/2018	1.32107	0.915152	1	1	4.5272	7.99168	0	1	0.700701	2.69067	1	0	49.5062	40.4527	1	0	3.79436	3.85496	0	0	7.66478	7.82985	0	0	0.645888	0.813399	0	0	2.19189	2.64024	0	0	0.639446	1.38791	0	0	1.17904	1.18829	0	0
15/12/2018	0.766073	1.6643	1	0	5.86591	8.02788	0	1	1.13104	3.7235	0	0	45.4606	62.8474	1	0	3.70101	3.98698	0	0	7.532	10.4603	0	0	0.698524	0.821571	0	0	2.42228	2.70009	0	0	0.848851	1.45857	0	0	1.16222	1.21207	0	0
16/12/2018	0.912726	1.92447	2	0	6.80955	7.63216	0	1	0.961706	4.88153	0	1	45.1057	54.3152	1	0	3.74336	4.31674	0	0	7.58835	12.4705	0	0	0.709612	0.834065	0	0	2.0464	2.40972	0	0	0.926181	1.53156	0	0	1.25682	1.25453	0	0
17/12/2018	1.1498	2.14886	2	0	6.87347	9.58407	0	1	1.84752	5.57624	0	1	45.0724	55.7554	0	0	4.60051	4.05856	0	0	7.40799	13.3801	0	1	0.713867	0.774166	0	0	2.22114	2.97259	0	0	0.841868	1.70683	1	0	1.15899	1.51495	0	0
18/12/2018	1.01893	1.21664	1	0	7.51252	11.8574	0	1	2.44908	6.13385	0	1	44.1135	60.4668	0	0	4.62186	4.67554	0	0	9.62687	13.9415	0	0	0.765913	0.796867	0	0	2.30662	3.03701	0	0	1.05336	1.22083	1	0	1.02435	1.24825	0	0
19/12/2018	1.52252	1.48296	1	0	6.49005	9.16963	0	1	0.952042	3.13905	0	1	59.8805	64.9028	0	0	4.3545	4.75249	0	0	10.2163	10.1252	0	0	0.759228	0.775264	0	0	2.24434	2.9802	0	0	1.1863	1.32328	0	0	1.04985	1.19838	0	0
20/12/2018	1.18533	1.05363	1	0	6.53659	9.34755	0	0	1.00407	3.32832	0	1	40.2799	55.3485	0	0	4.25682	5.60697	0	0	9.72169	5.644	0	0	0.749208	0.77008	0	0	2.31408	2.94738	0	0	1.28745	1.55137	0	0	1.11152	1.19638	0	0
21/12/2018	1.55685	1.03071	1	0	6.79114	10.1246	0	0	1.46696	2.08702	0	0	38.5301	55.6668	0	0	4.64097	5.69199	0	0	6.99809	6.51187	0	0	0.785671	0.770308	0	0	2.21436	3.41826	0	0	1.32928	1.68089	0	0	1.14908	1.29423	0	0
22/12/2018	1.00651	1.2568	2	0	6.23721	11.2306	0	0	0.939972	2.67226	1	0	48.7654	49.5786	0	0	3.41293	4.95064	1	0	4.84176	7.25831	0	0	0.77631	0.722575	0	0	2.22002	3.33325	0	0	1.30531	1.64425	0	0	1.12171	1.26482	0	0
23/12/2018	1.76454	1.35694	1	0	7.77281	11.9426	0	0	1.26173	4.15953	0	0	74.2462	56.6854	0	0	3.7601	5.60382	0	0	6.73033	6.34277	1	0	0.790998	0.705543	0	0	2.41376	3.21393	0	0	1.06661	1.40947	0	0	1.09329	1.27737	0	0
24/12/2018	2.84497	5.80586	0	0	5.63667	10.5143	0	0	1.37455	3.82536	0	0	67.6221	60.5365	0	1	3.49552	5.62744	0	0	6.23203	8.61648	1	1	0.792855	0.714514	0	0	2.43727	1.72796	0	0	1.14267	1.32934	0	0	1.06547	1.30819	0	0
25/12/2018	1.39539	1.68011	1	0	5.31838	10.3037	0	0	1.79532	2.61924	0	0	55.3805	57.8256	0	0	3.43893	5.09557	0	0	4.77275	13.3564	1	0	0.789407	0.772744	0	0	2.03108	1.58045	0	0	1.22904	1.18494	0	0	1.04584	1.27025	0	0
26/12/2018	1.31917	1.48808	0	1	4.51514	9.05148	0	0	3.90883	2.86081	1	0	62.7417	55.8475	0	1	3.26987	6.10393	0	0	2.99716	16.4569	1	1	0.742723	0.770051	0	0	2.04715	1.47557	0	0	1.69079	1.3431	0	0	1.41245	1.271	0	0
27/12/2018	1.31656	1.20209	1	0	4.72834	7.83737	0	0	3.9866	2.73519	1	0	57.8891	55.2287	0	0	3.05829	5.78148	0	0	3.18825	18.9681	1	0	0.733194	0.7842	0	0	2.08456	1.53821	0	0	2.05015	1.03001	0	0	1.42304	1.32918	0	0
28/12/2018	1.37686	1.43907	0	0	5.37942	8.24209	0	0	2.65452	2.61471	0	0	53.3723	60.1362	0	0	2.9439	4.46734	0	0	4.78032	15.7132	0	0	0.793461	0.778346	0	0	1.75773	1.56513	1	0	1.94268	1.17825	0	0	1.39527	1.35523	0	0
29/12/2018	1.33823	1.64979	0	0	4.54056	9.4915	0	0	2.64546	2.57957	0	0	62.6097	65.43	0	0	3.3285	7.4417	0	0	6.47928	18.685	0	0	0.790341	0.779706	0	0	1.80243	1.8546	1	0	1.89523	1.18857	0	0	1.27092	1.15883	0	0
30/12/2018	1.61134	1.51244	1	0	4.33415	8.33173	0	0	2.76637	2.72175	0	0	58.2539	70.4531	1	0	3.08126	4.97263	1	0	5.6671	19.148	1	0	0.782908	0.850421	0	0	1.88701	1.81794	1	0	1.77605	1.5644	0	0	1.2336	1.1755	0	0
31/12/2018	1.30375	1.41593	1	0	4.07058	5.24742	0	0	2.98572	3.40568	0	0	51.7927	67.2251	1	0	3.39588	5.38877	1	0	5.30573	18.8961	0	0	0.787325	0.849621	0	0	2.00566	1.20908	1	0	1.78909	1.26518	0	0	1.17448	1.15639	0	0
1/1/2019	1.49485	2.36633	0	0	4.65252	5.74113	0	0	3.25467	4.01722	0	1	50.8549	65.3576	1	0	3.59628	4.49368	0	1	8.18027	16.4002	0	0	0.78842	0.859218	0	0	1.95786	1.44781	1	0	1.75772	0.91222	1	0	1.18863	1.16619	0	0
2/1/2019	1.16528	2.22229	0	0	4.1237	5.79092	1	1	3.21722	4.65655	0	1	47.2493	60.1771	1	0	3.91884	4.51364	0	0	6.93432	13.6231	1	0	0.775271	0.843593	0	0	1.93346	1.39755	1	0	1.79622	1.45899	1	0	1.16125	1.09359	0	0
3/1/2019	1.20893	2.0577	0	0	6.02916	6.04106	0	1	2.96069	4.52591	0	1	34.761	57.448	1	0	3.28252	6.98427	0	0	7.54913	14.4921	1	0	0.77776	0.839351	0	0	1.92416	1.5595	0	0	2.05771	1.80671	0	0	1.13419	1.0245	0	0
4/1/2019	1.3164	1.89393	0	0	4.96407	5.59621	0	1	2.67898	4.30148	0	1	43.7272	55.753	0	0	3.12415	6.94335	0	0	7.10099	13.2185	0	0	0.775173	0.837119	0	0	1.98117	2.25909	0	0	2.11585	1.50347	0	0	1.13549	1.04699	0	0
5/1/2019	1.89081	1.83461	0	0	4.67261	6.01957	0	1	2.80442	4.99781	0	1	50.8993	46.8978	1	0	3.25415	5.26661	0	0	4.29851	14.6021	0	0	0.703034	0.852075	0	0	1.81413	1.54902	0	0	1.56816	2.00888	0	0	0.968757	1.0335	0	0
6/1/2019	1.82548	1.38031	0	0	4.59513	6.08537	1	1	2.40485	4.87682	1	0	36.6647	38.3765	2	0	3.04511	5.04433	0	0	6.26255	9.23775	0	1	0.696117	0.850663	0	0	1.78544	2.18399	0	0	1.45318	2.09958	0	1	0.957349	1.08172	0	0
7/1/2019	1.62636	1.73914	0	0	4.50346	8.54532	0	1	2.59709	4.25408	0	0	34.4326	44.1704	1	0	3.9582	4.86816	0	0	6.30547	14.1632	0	0	0.712774	0.852506	0	0	1.78137	2.21399	0	0	1.31504	1.76265	0	0	0.953254	1.07385	0	0
8/1/2019	1.47763	1.01662	0	0	4.45566	7.79031	0	1	2.58366	2.00157	1	1	32.3212	34.0517	2	1	4.03515	5.02238	0	0	10.9449	14.4677	0	0	0.721974	0.85827	0	0	1.84377	2.24997	0	0	1.39766	1.4872	0	0	0.996957	1.01849	0	0
9/1/2019	1.43535	2.16902	0	1	5.3208	5.81475	0	1	2.29887	2.49203	1	1	32.4064	36.8687	1	0	4.17514	4.57887	0	0	11.8696	9.75622	1	0	0.718019	0.852427	0	0	2.25588	1.64005	0	0	1.21738	2.17786	0	0	0.978292	1.05357	0	0
10/1/2019	1.51395	1.56693	0	1	4.4847	8.68496	0	1	1.96889	2.39579	1	1	29.2352	38.338	2	0	3.6194	4.50364	0	0	23.6678	13.3676	0	0	0.714641	0.856653	0	0	2.24542	1.64607	0	0	1.03943	2.25076	0	0	1.03412	1.13633	0	0
11/1/2019	1.28361	1.68001	0	1	5.18363	9.21911	0	0	2.05408	2.22448	2	1	25.3876	36.7124	1	0	3.84208	5.08698	0	0	10.148	11.1663	0	0	0.703899	0.865314	0	0	2.30438	1.70278	0	0	1.15201	1.27477	0	0	0.948705	1.14388	0	0
12/1/2019	1.46745	2.60553	0	0	3.40015	9.47873	0	1	1.23274	2.41539	3	1	31.1468	51.1761	1	0	3.20979	4.84248	1	0	9.48609	11.1136	1	1	0.712468	0.873318	0	0	2.3344	1.64191	0	0	0.979884	1.39824	0	0	0.987241	1.10696	0	0
13/1/2019	1.8787	2.19225	0	0	4.15592	9.8327	0	1	1.16748	1.95514	2	1	30.4586	59.0997	0	0	2.98144	5.35091	0	0	11.0798	10.4426	0	0	0.709623	0.876335	0	0	2.2954	1.55931	0	0	0.812729	1.58627	0	0	0.982913	1.0736	0	0
14/1/2019	1.89923	2.03665	0	0	4.35862	8.37644	1	1	1.34436	2.30078	1	1	26.4715	37.8562	1	0	2.72787	5.61411	1	0	14.9905	9.33156	0	1	0.70989	0.874957	0	0	2.19209	1.5569	0	0	1.00699	1.51237	0	0	1.00981	1.06745	0	0
15/1/2019	1.0821	1.85253	0	0	5.37885	8.31492	0	0	1.54247	2.17482	0	2	27.9233	35.2596	2	0	3.05077	5.51306	1	0	13.0298	10.3573	0	0	0.717385	0.877267	0	0	1.45499	1.6011	1	0	0.75785	0.658386	0	0	1.26309	0.982505	0	0
16/1/2019	1.27318	1.39232	0	1	6.33437	9.02159	0	0	1.42918	2.26492	1	1	28.817	26.2932	2	1	3.63322	6.44272	0	0	11.5253	6.88247	0	0	0.730278	0.876278	0	0	1.34226	1.45746	1	0	1.06567	0.604991	0	0	1.28784	0.998902	0	0
17/1/2019	1.43312	1.33218	0	1	7.78186	8.17552	0	0	1.52757	2.58667	0	0	56.0985	22.6281	2	1	3.54158	6.70562	0	0	8.45208	6.33442	0	0	0.742525	0.872782	0	0	1.54816	1.31104	0	0	1.33551	0.528939	0	0	1.30829	1.01983	0	0
18/1/2019	1.33783	1.41356	0	0	6.55434	7.68801	0	0	1.48984	3.0341	0	0	26.118	22.8697	2	1	3.76479	5.38319	0	0	10.0849	7.45618	0	0	0.756814	0.860427	0	0	1.57361	1.59104	0	0	1.23932	0.817743	0	0	1.29466	1.01943	0	0
19/1/2019	1.31105	1.37188	0	0	5.19775	7.40315	0	0	4.73049	3.01637	0	0	36.4741	22.9603	1	0	3.05007	5.12258	0	0	7.91165	4.19592	0	0	0.747053	0.862814	0	0	2.39284	1.31593	0	0	1.0989	0.61112	0	0	1.34639	0.994917	0	0
20/1/2019	2.67366	1.49947	1	0	4.56416	6.60577	0	0	4.66122	3.18057	0	0	28.7351	23.1611	1	1	3.4577	4.34831	0	0	7.23587	4.4665	0	0	0.753679	0.862538	0	0	2.33543	1.25507	0	0	1.07501	0.451688	0	0	1.32201	0.990875	0	0
21/1/2019	1.49569	1.32794	0	0	4.93528	5.60501	0	0	4.58336	2.19378	0	1	19.3303	25.6939	1	1	3.74492	4.28898	0	0	5.9042	4.95148	1	0	0.743227	0.847986	0	0	2.41213	1.1752	0	0	1.09615	0.43477	0	1	1.09259	1.04672	0	0
22/1/2019	2.82839	1.32316	0	0	4.72746	5.26154	0	0	3.74436	2.95855	0	0	29.411	23.8937	0	0	4.2009	4.30837	0	0	7.73391	4.79961	0	0	0.725401	0.858594	0	0	2.46377	1.09196	0	1	1.27627	0.472714	0	1	1.06745	1.05028	0	0
23/1/2019	1.23654	0.981207	0	1	5.75241	4.8673	1	0	3.70358	2.74405	0	0	22.1588	16.858	1	2	4.12812	4.16832	0	0	8.78485	6.57283	0	0	0.765835	0.851716	0	0	1.64043	1.20309	0	1	2.01511	0.51399	0	0	1.05991	1.06946	0	0
24/1/2019	2.01516	0.824946	0	0	5.29946	5.08872	1	0	2.59806	2.48029	0	1	47.7606	9.45411	0	1	3.71446	4.39129	0	0	4.83782	4.63554	0	0	0.769008	0.841464	0	0	1.64435	1.14898	0	1	1.95553	0.499322	0	0	1.04045	1.01378	0	0
25/1/2019	2.53789	0.828088	0	0	6.56925	4.79821	0	0	2.43317	2.10322	0	1	31.3554	9.04604	1	2	4.58261	4.11639	0	0	4.6916	4.75838	0	0	0.807127	0.84158	0	0	1.68754	1.22641	0	1	1.93987	0.793091	0	0	1.05539	1.02718	0	0
26/1/2019	1.38015	0.87501	0	0	6.21225	4.38482	0	1	5.42446	2.21862	0	1	26.0841	9.51086	0	2	4.5125	4.05986	0	0	5.42385	5.16481	0	0	0.810335	0.859079	0	0	1.63483	1.39333	0	1	1.26648	0.803814	0	0	1.02131	1.03608	0	0
27/1/2019	1.36608	0.7984	0	0	6.98729	4.99328	0	1	5.38538	2.70421	0	0	21.892	18.9602	0	2	4.14173	4.18634	0	0	7.79031	6.02886	0	0	0.813989	0.847727	0	0	1.54389	1.46196	0	0	1.4008	0.709686	0	0	1.00798	1.08137	0	0
28/1/2019	1.83595	1.4708	0	0	6.90277	5.37492	0	1	4.98448	2.60945	0	0	20.6376	19.8003	1	1	4.09835	4.24322	0	0	7.12799	4.81237	0	0	0.815859	0.837752	0	0	1.59996	1.46709	0	0	1.66038	0.66347	0	1	0.943042	1.07745	0	0
29/1/2019	1.66412	1.50185	0	0	6.6664	5.06124	1	0	4.45516	2.56512	0	0	32.3531	22.1577	1	1	4.2464	4.46009	0	0	4.50811	4.0894	0	0	0.834951	0.831226	0	0	1.46987	1.5618	0	0	1.37093	0.97026	0	0	0.941935	1.0535	0	0
30/1/2019	2.13416	1.66282	0	0	7.07481	5.07349	0	1	4.24864	2.66209	0	0	24.5252	15.6947	0	2	3.12658	4.32448	0	0	5.02922	4.03721	0	0	0.836119	0.834495	0	0	1.44686	1.64123	0	0	1.42905	0.642758	0	0	0.962097	1.06837	0	0
31/1/2019	1.89966	0.99287	0	0	7.32653	4.62755	0	1	2.48262	2.75184	2	0	26.1463	12.8775	0	1	3.29022	3.37594	0	1	5.59218	4.35547	0	0	0.836108	0.823935	0	0	1.46285	1.58681	0	0	1.50344	0.698853	0	0	1.1072	1.0601	0	0
1/2/2019	2.58271	0.985736	0	0	8.11097	5.3152	0	0	2.39985	2.67517	2	0	28.8467	12.7218	0	1	3.21939	3.79854	0	0	6.10212	4.49246	1	0	0.833282	0.837485	0	0	1.41342	1.57348	0	0	1.65423	0.731388	0	0	1.14181	1.07145	0	0
2/2/2019	1.92197	3.00946	0	0	6.86991	4.89429	0	0	2.92714	3.34904	3	0	30.1417	15.6011	1	2	3.53246	4.21751	0	0	2.80373	5.19565	0	0	0.845462	0.814945	0	0	1.5973	1.39652	0	0	1.65305	0.626354	0	0	1.14266	1.12783	0	0
3/2/2019	1.77961	1.13917	1	0	6.93058	5.0241	0	1	2.95699	3.03121	1	0	29.711	15.4762	1	2	3.42072	4.57274	0	0	3.26529	5.56147	0	0	0.863233	0.821396	0	0	1.67766	1.26209	0	0	1.67922	0.764624	0	0	1.19663	1.11735	0	0
4/2/2019	1.82272	2.15238	1	0	6.75806	4.75478	0	0	3.38086	2.80004	1	0	27.5883	14.0211	1	1	3.48492	4.91167	0	0	3.70257	5.14901	0	0	0.890404	0.821827	0	0	1.54126	1.65455	0	0	1.32879	0.748894	0	0	1.18426	1.14729	0	0
5/2/2019	2.78454	1.33487	0	0	7.39255	4.50866	1	0	3.62189	3.36548	0	0	34.873	23.0118	1	1	3.52584	4.70052	0	0	4.91122	5.13422	0	1	0.895041	0.844275	0	0	1.41492	1.68262	0	0	2.21212	0.68819	1	0	1.20483	1.18444	0	0
6/2/2019	1.82185	1.63072	0	0	9.12761	4.60334	1	0	3.39628	3.67356	0	1	21.5574	15.9448	1	1	3.58141	4.67361	0	0	4.32495	5.05259	1	0	0.891189	0.852346	0	0	1.73283	1.98464	0	0	1.8734	0.632009	0	1	1.17807	1.19954	0	0
7/2/2019	1.43103	2.32137	0	0	8.38304	6.62399	0	1	3.23508	3.00153	0	0	22.811	9.45303	2	1	4.13421	4.81059	0	0	4.10015	4.05002	1	0	0.888733	0.87659	0	0	1.76797	2.10901	0	0	0.931522	0.694518	0	0	1.11824	1.14588	0	0
8/2/2019	1.17294	1.51849	0	0	10.2447	6.96242	0	1	3.65849	2.61603	0	1	21.5822	19.6754	1	3	3.85199	4.71121	0	0	7.41371	3.74354	1	0	0.90358	0.887644	0	0	2.12287	2.23917	0	0	1.51175	0.68536	0	0	1.19506	1.15667	0	0
9/2/2019	1.32241	1.31817	0	1	7.33428	7.40162	0	0	3.55415	3.50861	0	0	20.501	13.8502	1	3	4.24059	4.58181	0	0	6.42937	3.61456	1	0	0.903222	0.881285	0	0	2.36381	1.97928	0	0	1.53383	1.05473	0	0	1.18119	1.10561	0	0
10/2/2019	1.82671	1.77157	0	0	9.64423	8.62364	0	0	3.0909	3.19671	0	0	24.7678	40.7318	0	2	4.04483	4.61773	0	0	6.09054	2.93058	1	1	0.916659	0.894996	0	0	2.24314	1.91335	0	0	1.66154	1.06094	0	0	1.06684	1.0548	0	0
11/2/2019	1.4975	1.75492	0	0	8.46709	7.91203	0	0	2.89349	3.60733	0	0	27.1876	21.0098	0	2	4.92133	4.39952	0	0	5.69991	3.23227	2	0	0.926264	0.919288	0	0	2.18466	1.91479	0	0	1.5289	1.08897	0	0	1.12611	1.08374	0	0
12/2/2019	1.29315	1.38707	0	0	8.88597	5.84518	0	0	4.08037	3.69597	0	0	27.4112	16.8969	0	1	4.37385	4.86925	0	0	8.89028	3.20117	0	0	0.922009	0.937853	0	0	2.08633	1.75801	0	0	1.46612	1.20391	0	0	1.11774	1.21753	0	0
13/2/2019	1.10822	1.59989	0	0	8.29415	6.41367	1	0	2.76349	3.52856	0	0	29.5971	13.3919	0	1	3.92214	4.85733	0	0	12.2166	4.44387	0	0	0.935976	0.92722	0	0	2.22416	1.92739	0	0	1.52189	1.27572	0	0	1.15822	1.22267	0	0
14/2/2019	1.24024	1.60086	0	0	7.48851	5.98954	1	0	2.64674	4.84185	0	1	28.6223	20.6507	0	0	3.89739	5.24378	1	0	6.97332	6.01428	0	0	0.935663	0.920317	0	0	2.12191	1.60638	0	0	1.14014	0.88302	0	0	1.18482	1.13414	0	0
15/2/2019	1.18357	1.70542	0	0	7.42664	6.36994	0	0	2.55756	2.79458	0	0	28.0516	21.0161	0	1	4.15262	4.7307	0	0	6.60808	5.70578	0	0	0.938609	0.914654	0	0	1.76667	1.54889	0	0	1.18813	0.697879	0	0	1.06154	1.14604	0	0
16/2/2019	1.31051	1.67312	0	0	9.09178	6.89414	0	0	2.95338	2.13841	0	0	24.3308	21.7523	0	1	4.52956	4.65399	0	0	7.04597	8.98763	0	0	0.925589	0.917095	0	0	1.7038	1.47683	0	0	1.08207	0.69216	0	0	1.15137	1.15199	0	0
17/2/2019	3.65457	1.68668	0	0	7.06598	6.69988	0	0	2.75237	2.18388	0	0	28.5571	29.4523	0	1	5.10125	4.88859	0	0	6.88166	9.07646	0	0	0.930627	0.927382	0	0	1.93105	1.41098	0	0	1.18272	0.792993	0	0	1.09723	1.3359	0	0
18/2/2019	1.97984	1.74328	0	0	6.8088	7.53834	0	0	3.64348	2.44231	0	0	21.2734	28.8356	1	1	3.81693	4.61993	0	0	8.6491	9.86009	0	0	0.956097	0.940219	0	0	1.99012	1.75573	0	0	1.37822	1.55547	0	0	1.08285	1.11323	0	0
19/2/2019	1.10874	1.75501	0	0	6.41093	8.56534	0	0	3.34923	3.37466	0	0	22.6575	26.4566	1	1	3.76701	4.59633	1	0	6.39059	10.2406	1	0	0.981625	0.954687	0	0	1.94876	2.17645	0	0	1.6089	1.66114	0	0	1.04106	1.08588	0	0
20/2/2019	1.45144	1.50142	0	0	5.5249	6.8198	0	0	3.38646	3.16562	0	0	20.5255	16.3037	0	1	3.45922	4.43342	0	0	8.11168	9.655	0	0	1.00045	0.958747	0	0	2.16071	2.31859	0	0	1.16984	1.71818	0	0	1.09492	1.05148	0	0
21/2/2019	1.21821	1.08773	0	0	6.05587	6.04702	0	0	3.66679	3.06458	0	0	21.9371	17.6364	0	1	3.63707	4.47373	0	0	8.2306	12.2825	0	0	1.00431	0.969913	0	0	1.50165	2.50107	0	0	1.16177	0.790171	0	0	1.09902	1.0357	0	0
22/2/2019	1.48415	1.33679	0	0	5.56194	5.50466	0	0	3.55313	2.69154	0	0	24.683	19.2323	1	1	4.36224	4.45225	0	0	8.52847	12.7913	0	0	1.02157	0.991072	0	0	1.57759	2.50229	0	0	1.25723	0.517079	0	0	1.05718	1.14454	0	0
23/2/2019	1.77659	1.84409	0	0	5.52681	5.44329	0	0	3.50121	3.10633	0	0	15.4716	19.1697	2	1	3.53094	4.90538	0	0	14.5745	6.98508	0	0	1.0227	1.0054	0	0	2.20921	2.72871	0	0	1.42676	0.464259	0	0	0.97224	1.03618	0	0
24/2/2019	1.5807	1.30207	0	0	6.06784	5.38245	0	0	3.55984	2.88302	0	0	9.2551	14.2465	2	2	3.74814	5.18826	0	0	14.6406	4.42583	0	0	1.00886	1.01138	0	0	2.02597	2.99171	0	0	1.1751	0.695429	0	0	1.08939	1.01006	0	0
25/2/2019	2.14562	1.75815	0	0	6.33525	8.44297	0	1	4.66976	2.54288	0	0	17.5713	13.7697	1	1	4.59203	4.8881	0	0	12.3988	12.0303	0	0	1.01453	1.01362	0	0	1.44774	2.54844	0	0	0.944961	0.957847	0	0	1.13167	1.02655	0	0
26/2/2019	2.57463	1.28123	0	0	5.18375	8.80839	0	0	4.71667	2.45861	0	0	24.2652	14.1378	4	1	4.5451	5.33189	0	0	7.94114	15.5189	1	0	1.01936	1.04428	0	0	1.55265	3.02093	0	0	1.49788	0.937006	0	0	1.03978	1.01981	0	0
27/2/2019	2.28513	1.27401	0	0	4.96568	7.42789	0	0	4.58475	2.58227	0	0	28.9658	13.1243	3	1	5.07453	5.5609	0	0	7.83041	7.72008	0	0	1.01368	1.05609	0	0	1.41276	2.90755	0	0	1.43993	0.916407	0	0	1.17877	1.02659	0	0
28/2/2019	1.99802	1.34464	0	0	4.41388	7.1801	0	0	4.57934	2.57901	0	0	25.7079	11.7771	3	0	4.69917	4.79506	0	0	11.2002	7.30784	0	0	1.00566	1.07172	0	0	1.54479	3.00132	0	0	1.41799	1.01125	0	0	1.13379	1.02098	0	0
1/3/2019	2.3459	1.48519	0	0	4.7218	6.87387	0	0	4.75075	2.47093	0	0	30.828	28.8887	1	0	4.03495	6.20391	1	0	11.6643	7.21995	0	0	1.00545	1.08618	0	0	1.37706	3.24728	0	0	1.42865	1.22614	0	0	1.12729	1.06891	0	0
2/3/2019	1.9917	2.16982	0	0	6.27305	5.55043	0	0	5.24553	2.57673	0	0	28.7117	23.7587	1	3	4.92594	8.02517	0	0	8.97102	6.97418	0	0	1.00858	1.08205	0	0	1.29399	3.22399	0	0	1.40622	1.02466	0	0	1.1064	1.08045	0	0
3/3/2019	4.27728	1.37308	0	0	6.60783	4.91596	0	0	5.45162	2.45883	0	1	28.4583	24.119	1	3	4.90922	6.72004	0	0	10.8046	7.04712	0	0	1.00897	1.07134	0	0	1.3238	3.31101	0	0	1.53834	1.10007	0	0	1.14714	1.07876	0	0
4/3/2019	3.63354	1.37255	0	0	6.11788	4.66641	0	0	4.62909	2.64041	0	0	16.692	18.1323	1	1	4.85133	6.22552	0	0	9.38138	7.36469	0	0	1.00725	1.02742	0	0	1.2788	2.38914	0	0	1.41557	1.23175	0	0	1.2146	1.04532	0	0
5/3/2019	3.42664	1.3164	0	0	5.47091	4.90498	0	0	4.88723	2.64371	0	0	21.1983	18.8506	0	1	5.14051	5.96046	0	0	9.01903	6.86923	0	0	1.01105	1.02535	0	0	1.28826	2.37581	0	0	1.4362	1.19528	0	0	1.1505	1.06405	0	0
6/3/2019	3.50057	1.36788	0	0	5.40281	6.05964	0	0	3.27485	3.12112	0	0	20.6275	14.7268	0	2	5.16152	5.05193	0	0	8.78997	6.18405	0	0	0.994147	1.02627	0	0	1.79949	2.39422	0	0	1.49243	1.25815	0	0	1.10856	1.07759	0	0
7/3/2019	3.56714	1.25867	0	0	5.01216	6.38479	0	0	3.39085	2.75766	0	0	21.074	16.2369	1	2	5.37186	4.46072	0	0	8.65016	11.3279	0	0	0.995557	1.03283	0	0	1.75532	2.55228	0	0	1.41899	1.10773	0	0	1.06465	1.08423	0	0
8/3/2019	3.52454	1.25841	0	0	5.10088	6.2093	1	0	4.36484	3.53993	0	0	21.0029	17.4398	0	1	3.98623	6.16227	0	0	10.2881	9.20139	0	1	1.00216	1.03906	0	0	1.60712	2.36025	0	0	0.947419	1.1409	0	0	1.08942	1.04814	0	0
9/3/2019	3.42508	1.38613	0	0	4.57827	6.10537	1	0	4.65491	3.33318	0	0	22.1528	19.1021	0	2	3.82988	4.58183	0	0	10.4382	8.88122	0	1	1.00493	1.02113	0	0	1.87761	2.2467	0	0	1.1346	1.19262	0	0	1.10857	0.954424	0	0
10/3/2019	2.78358	1.53181	0	0	4.92924	5.66864	0	0	3.35181	2.97662	0	0	19.8746	17.5102	0	2	3.87535	5.85749	0	0	8.51186	8.60006	1	1	1.00486	1.02951	0	0	1.80549	2.2624	0	0	1.1181	1.47147	0	0	0.840988	0.961891	1	0
11/3/2019	3.4105	1.7648	0	0	5.0648	5.53407	0	0	3.47645	3.04574	0	0	19.2403	19.0859	0	1	3.93222	6.09756	0	0	9.24125	2.7582	1	1	1.00485	1.03148	0	0	1.71946	2.29544	0	0	1.14824	1.33837	0	0	0.845074	0.967606	1	0
12/3/2019	2.11438	1.49797	0	0	4.85804	5.43473	0	0	3.38155	2.5792	0	0	17.3303	15.846	1	1	4.61565	5.42128	0	0	7.30338	4.09073	1	0	1.0108	1.0252	0	0	1.83283	2.32037	0	0	1.16783	1.47337	0	0	0.841383	0.936211	0	0
13/3/2019	1.83789	1.63997	0	0	4.99581	5.70062	0	0	5.09373	2.48536	0	0	18.993	14.8567	1	1	3.9473	5.49225	0	0	8.90408	4.45641	0	0	1.02427	1.0265	0	0	2.08665	1.86298	0	0	1.17176	1.42913	0	0	0.990726	1.02294	0	0
14/3/2019	2.11338	1.55986	0	0	4.43167	5.63042	0	0	3.82086	2.38155	0	0	19.2941	14.3331	1	1	3.85692	6.17022	0	0	5.82146	5.30959	1	0	1.02301	1.05967	0	0	2.76193	1.82175	0	0	1.09603	1.25952	0	0	1.10515	1.10802	0	0
15/3/2019	2.1136	1.45671	0	0	6.18135	5.25666	1	0	2.38707	2.95698	0	0	18.1829	16.6018	1	1	5.31132	6.00351	0	0	6.53927	4.72514	0	1	1.0204	1.07492	0	0	3.06602	1.77892	0	0	1.21442	1.33505	0	0	1.14098	1.06719	0	0
16/3/2019	3.4178	1.64304	0	0	4.92829	5.8383	0	0	3.05765	2.99943	0	0	19.8606	14.5573	1	1	4.98522	5.37019	1	0	6.09898	5.34653	1	1	1.03769	1.09044	0	0	2.74158	1.55997	0	0	1.22217	1.26231	0	0	1.1734	1.13323	0	0
17/3/2019	1.92928	1.66646	0	0	5.18639	4.28702	0	0	4.00342	2.83885	0	0	21.5482	16.1532	0	0	5.49674	6.03344	0	0	9.26537	4.25165	0	1	1.04885	1.10622	0	0	3.29255	1.65777	0	0	1.20325	1.35534	0	0	1.21037	1.13238	0	0
18/3/2019	1.93904	1.27832	0	0	5.61203	4.91381	0	0	3.62679	2.86287	0	0	20.7883	24.7672	0	0	5.39221	6.1068	0	0	8.7035	4.32832	0	1	1.04802	1.1154	0	0	3.16748	1.76952	0	0	1.22203	1.19321	0	1	1.14238	1.10325	0	0
19/3/2019	1.9861	1.40838	0	0	4.89558	4.51914	0	0	2.98985	4.78938	0	0	21.3431	23.0317	1	0	5.32563	5.92428	0	0	8.40532	4.52517	0	1	1.03508	1.10641	0	0	2.83589	1.54785	0	0	1.42644	0.865934	0	1	1.08781	1.09717	0	0
20/3/2019	2.23468	1.42651	0	0	5.57825	5.37272	0	0	3.12957	4.39083	0	0	23.1643	20.7029	1	0	5.23602	6.01663	0	0	9.23393	4.51066	0	1	1.02403	1.09027	0	0	2.29331	1.44749	0	0	1.32584	0.701154	0	0	1.08331	1.08049	0	0
21/3/2019	2.45301	1.58686	0	0	4.80505	4.41749	0	1	3.44851	2.59326	0	0	26.1377	19.5297	1	0	5.63294	6.01993	0	0	9.1409	3.74093	0	1	1.00661	1.10903	0	0	2.28834	1.58308	0	0	1.23265	0.915848	0	0	1.20855	1.04437	0	0
22/3/2019	2.38382	2.42149	0	0	7.3691	5.97285	0	0	2.95975	2.66216	0	0	32.5645	32.3818	2	0	4.54516	5.75238	0	0	6.58224	4.1609	0	1	1.01669	1.11491	0	0	1.962	1.46593	0	0	1.03065	0.914744	0	0	1.25752	1.12266	0	0
23/3/2019	2.03129	1.05554	0	0	7.68708	5.55519	0	0	3.0745	2.1725	0	0	32.3371	21.6624	1	1	4.57247	5.64144	0	0	6.92872	3.94924	0	1	1.02043	1.10478	0	0	1.89098	1.50171	0	0	1.13434	0.847537	0	0	1.10703	1.12575	0	0
24/3/2019	1.99181	1.41723	0	0	7.05982	4.84111	0	0	2.77134	3.05564	0	0	20.6375	13.2579	1	1	4.44666	6.08011	0	0	6.54675	4.20017	0	1	1.0163	1.09951	0	0	2.04137	1.4611	0	0	1.08168	0.873263	0	0	1.12722	1.11228	0	0
25/3/2019	2.02906	1.82881	0	0	7.71302	5.27162	0	0	2.78221	2.96101	0	0	24.71	14.0094	1	1	4.19864	4.8434	0	0	5.65677	4.69481	0	0	1.0087	1.1109	0	0	1.85856	1.32838	0	0	1.06049	0.920789	0	0	1.20096	1.07165	0	0
26/3/2019	2.00065	1.44165	0	0	5.47231	5.56438	0	0	3.31424	2.91196	0	0	23.553	12.6841	0	1	4.67377	5.23337	0	0	7.9037	4.62819	0	0	1.00421	1.09964	0	0	1.63183	1.26863	0	1	0.920055	0.979815	0	0	1.05414	1.08965	0	0
27/3/2019	1.67822	1.50961	0	0	4.84096	5.96952	0	0	3.40453	2.18379	1	0	24.7377	14.7078	0	0	5.06508	5.57386	0	0	7.53374	3.12362	0	0	0.984968	1.09678	0	0	1.79778	1.45692	0	0	0.919064	0.925468	0	0	1.06184	1.08165	0	0
28/3/2019	1.8071	1.19273	0	0	5.44426	5.53705	0	0	2.46956	2.09592	1	1	19.5684	17.6833	0	0	4.46749	5.8369	0	0	6.94711	4.71753	0	0	0.97237	1.06124	0	0	1.64833	1.4621	0	0	0.770376	1.01615	0	0	1.07892	1.05505	0	0
29/3/2019	3.2569	1.34657	0	0	7.6043	5.49707	0	0	2.20101	1.88087	1	1	26.4107	25.939	0	0	4.10792	5.76877	0	0	6.78639	5.15486	0	0	0.972641	0.997722	0	0	2.0586	1.7096	0	0	1.00611	1.06972	0	0	1.09623	1.06087	0	0
30/3/2019	1.90528	3.4358	0	0	7.20118	5.17137	0	1	2.43788	2.33654	0	1	23.1408	31.8176	0	0	4.68872	6.01262	0	0	6.11116	5.5388	0	1	0.99325	1.07728	0	0	2.14835	2.33317	0	0	0.977555	1.23233	0	0	1.04724	1.09271	0	0
31/3/2019	2.03207	1.81304	0	0	6.0748	4.10457	0	0	2.5972	2.42422	0	1	25.4141	33.7999	0	0	4.7006	5.37092	0	0	5.94494	3.85246	2	0	0.994626	1.03465	0	0	2.00087	2.42801	0	0	1.0226	1.04315	0	0	1.02831	0.976158	0	0
1/4/2019	2.3709	1.75634	0	0	6.24097	4.73195	0	0	2.9114	2.35771	0	1	24.6788	33.7974	0	0	4.83056	6.01534	0	0	4.3812	3.1358	1	0	1.00004	1.03163	0	0	2.03198	2.27115	0	0	1.46128	1.0225	0	0	1.05682	1.11003	0	0
2/4/2019	2.64819	1.86614	0	0	6.07784	5.22569	0	0	3.13063	2.1183	0	1	32.3351	24.8257	0	1	4.94516	6.55692	0	0	5.62292	4.07752	1	0	0.996588	1.01539	0	0	2.06585	2.29491	0	0	1.44573	1.17258	0	0	1.01557	1.10432	0	0
3/4/2019	2.08883	1.74113	0	0	5.93249	5.96947	0	0	3.10557	2.71545	0	0	34.1062	29.4653	0	1	4.89209	6.72213	0	0	6.13749	4.41409	1	0	0.990956	1.03365	0	0	2.03151	2.50587	0	0	1.53978	1.26159	0	0	1.11616	0.978724	0	0
4/4/2019	2.12082	1.59586	0	0	5.82633	6.52746	0	1	3.56414	3.04477	0	0	33.0621	32.9491	0	0	4.92072	5.59669	0	0	5.54571	5.10395	1	0	0.991752	1.02793	0	0	1.97886	1.76746	0	0	0.955419	1.26564	0	0	1.10336	0.985409	0	0
5/4/2019	2.09821	1.65769	0	0	15.1632	6.40943	0	0	3.38633	3.00276	0	1	28.8276	35.0345	0	0	5.60388	6.19351	0	0	4.97454	5.07964	1	0	0.985559	1.04288	0	0	1.82848	1.81033	0	0	0.832835	1.20704	0	1	1.15118	0.946271	0	0
6/4/2019	1.96019	2.20458	0	0	14.4182	6.6585	0	0	4.09014	2.93237	0	0	28.1229	41.8315	0	0	5.29858	6.207	0	0	6.20623	5.51094	0	0	0.993215	1.04684	0	0	1.85476	1.64178	0	0	1.10743	1.62823	0	0	1.25969	0.946	0	0
7/4/2019	2.02417	1.7887	0	0	9.0196	6.24824	0	0	3.64119	3.06949	0	0	30.6959	41.2615	0	0	6.02956	6.02456	0	0	4.36336	5.68672	0	0	0.98711	1.03962	0	0	1.99189	1.61088	0	0	1.10847	1.42582	0	0	1.34088	1.07644	0	0
8/4/2019	1.71607	2.01411	0	0	9.75304	7.20151	0	0	3.50683	3.27085	0	0	32.2804	30.0163	0	0	6.40121	6.05363	0	0	6.83571	4.15827	0	0	0.945218	1.01907	0	0	2.34541	1.67117	0	0	1.03356	1.07095	0	0	1.39447	1.02729	0	0
9/4/2019	1.89424	2.06928	0	0	3.41444	7.18916	0	0	2.91401	3.76614	0	0	33.6007	31.1543	0	0	5.38771	5.90295	0	0	7.29597	3.87188	0	0	0.944847	0.987864	0	0	2.04761	1.55427	0	0	0.965181	1.0785	0	0	1.338	0.995018	0	0
10/4/2019	1.67888	1.77292	0	0	3.39467	8.39745	1	0	2.17491	3.20831	0	0	31.0299	30.8496	0	0	5.80446	6.21456	0	0	6.87109	3.75772	0	1	0.881819	1.0173	0	0	2.10403	1.66095	0	0	1.16361	1.37192	0	0	1.17916	1.24198	0	0
11/4/2019	1.63658	1.68963	0	0	4.03316	8.32084	0	0	2.32255	2.62867	0	0	30.9976	30.9746	0	0	5.52656	5.9665	0	0	7.57797	3.61	0	0	1.00321	1.00727	0	0	2.09134	1.56947	0	0	1.27939	1.07742	0	0	1.19836	1.2008	0	0
12/4/2019	1.36135	1.69633	1	0	3.88356	7.27316	0	0	2.05185	2.3091	0	1	30.3917	34.2608	0	0	5.84202	5.70628	0	0	6.93763	4.11039	1	0	0.93434	1.01222	0	0	2.36791	1.5979	0	0	1.20207	1.18282	0	0	1.23191	1.18519	0	0
13/4/2019	1.43941	1.58999	0	0	6.19521	7.77371	0	1	1.84974	2.23123	0	0	31.5047	29.3437	0	0	4.9132	5.97612	0	0	6.5052	4.64475	0	0	0.93373	1.015	0	0	3.02285	1.74374	0	0	1.06425	1.17484	0	0	1.28005	1.19833	0	0
14/4/2019	1.29877	1.43092	0	0	6.39257	7.33801	0	1	1.37056	2.66791	0	0	29.1781	28.2549	0	0	4.6642	6.09239	0	0	5.80587	5.39763	1	0	0.926392	1.02039	0	0	1.97438	1.57459	0	0	1.03247	1.31797	0	0	1.18446	1.16218	0	0
15/4/2019	1.16014	1.61504	0	0	3.48293	5.96347	1	1	1.75753	2.31475	0	0	34.0284	32.1004	0	0	4.53136	5.70555	0	0	4.24053	5.02092	0	0	0.850815	1.01806	0	0	1.92829	1.56128	0	0	1.18064	1.09912	0	0	1.14038	0.902442	0	1
16/4/2019	1.17213	1.77309	0	0	3.2619	6.78215	1	0	1.5917	2.31954	0	0	32.6135	33.0165	0	0	4.27564	6.11141	0	0	5.0257	5.70307	0	0	0.855336	0.983176	0	0	1.54713	1.61194	0	0	1.10448	1.12846	0	0	1.14033	0.901358	0	1
17/4/2019	1.19667	1.98302	0	0	3.52696	6.34116	1	0	1.54628	2.41579	0	0	30.2495	36.1628	0	0	4.31673	6.05961	0	0	5.45407	6.07709	0	0	0.856731	0.873554	0	0	2.05396	1.52618	0	0	1.19204	1.43243	0	0	0.998888	0.888981	0	1
18/4/2019	2.1179	1.62057	0	0	3.41356	7.61375	1	0	1.44686	2.37722	0	0	33.3073	30.4689	0	0	4.59261	6.04493	0	0	4.12529	6.05231	0	0	0.863664	0.866822	0	0	1.60412	1.51007	0	0	1.07315	1.43882	0	0	0.97731	0.959626	0	0
19/4/2019	1.20635	1.5256	1	0	9.69391	7.04902	1	0	0.84362	2.17605	1	0	33.8401	29.5264	0	0	5.01681	6.1804	0	0	4.16629	5.7921	0	0	0.937808	0.861088	0	0	1.57212	1.82315	0	0	1.50867	1.29479	0	0	1.00756	1.0774	0	0
20/4/2019	1.16319	1.48914	1	0	9.37643	6.96001	1	0	0.886487	2.08098	0	0	35.2028	36.4646	0	0	4.98959	5.9871	0	0	4.40976	5.48201	0	0	0.940401	0.857678	0	0	1.47549	1.66082	0	0	1.22835	1.3015	0	0	1.07328	1.0772	0	0
21/4/2019	1.79447	2.0136	0	0	8.14606	7.0758	1	0	1.71113	3.47463	0	0	33.8125	40.5342	0	0	4.95702	5.89733	0	0	6.03091	5.27826	0	0	0.927705	0.853329	0	0	1.49522	2.31573	0	0	1.12148	1.24915	0	0	0.977369	1.10263	0	0
22/4/2019	2.20043	1.46799	0	0	7.95997	7.43634	1	0	1.71695	2.84574	0	0	29.6171	27.7379	0	1	4.84827	5.6786	0	0	7.08487	5.80361	0	0	0.958343	0.776469	0	0	1.48203	2.2995	0	0	0.94598	1.20915	0	0	0.969476	1.12579	0	0
23/4/2019	1.87348	1.79302	0	0	3.6435	6.36946	1	0	2.23967	2.59073	1	0	25.9979	33.9565	0	1	5.06004	6.18587	0	0	5.99919	5.53915	0	0	0.952544	0.769643	0	0	1.88413	2.08778	0	0	1.10944	1.19942	0	0	1.04528	1.11271	0	0
24/4/2019	1.72814	2.07092	0	0	5.15179	6.26865	1	0	2.12933	2.58373	0	0	29.3833	32.307	0	0	5.54116	4.90512	0	0	6.42702	5.7064	0	0	0.956443	0.756461	0	0	1.94037	2.28052	0	0	1.97001	1.09358	0	1	0.939442	1.07433	0	0
25/4/2019	2.22027	2.0317	0	0	6.16854	6.13079	0	0	2.38302	1.78125	1	0	31.663	29.3238	0	1	5.4956	4.51709	0	0	7.19629	6.12525	0	0	0.906055	0.760573	0	0	1.9903	2.09577	0	0	2.76034	1.11548	0	1	1.05605	0.961073	0	0
26/4/2019	1.66372	1.70418	0	0	6.41221	6.2051	1	0	1.53185	2.72062	0	0	26.0601	28.3807	1	1	4.37133	4.44835	0	0	8.05682	10.1641	1	0	0.931644	0.678369	0	0	1.9895	1.85287	0	0	2.38387	1.08467	0	1	1.09238	0.94855	0	1
27/4/2019	1.5986	2.99084	0	0	5.57822	5.82463	0	0	4.12057	2.9927	0	0	23.2601	22.3532	1	1	4.56609	4.55634	0	0	7.7613	10.8002	0	0	0.835686	0.674737	0	0	1.55139	1.92099	0	0	2.17352	1.18324	0	0	1.13283	1.05664	0	1
28/4/2019	1.60817	3.37571	0	0	5.5973	4.79789	0	0	1.96397	2.73357	1	0	25.1655	25.5563	0	1	4.47994	5.63821	0	0	7.77454	7.43268	0	0	0.83544	0.673047	0	0	1.43226	2.14647	0	0	1.32486	1.22238	0	0	1.10018	1.0827	0	1
29/4/2019	1.41947	2.48222	0	0	5.5058	4.79246	0	0	1.112	2.73794	0	0	30.6035	27.2695	0	1	4.19087	6.64773	0	0	6.37941	6.91881	0	0	0.814248	0.67973	0	0	1.28302	2.01349	0	0	1.38448	1.45179	0	0	1.15198	1.04133	0	1
30/4/2019	1.20142	1.91466	0	0	6.28625	4.49264	0	0	1.38263	2.09882	2	0	28.9796	29.4459	0	1	5.2591	6.32628	0	0	6.05608	5.51217	0	0	0.744439	0.643202	0	0	1.40702	2.00743	0	0	1.31962	1.19429	0	1	1.1482	1.04389	0	1
1/5/2019	1.18788	1.83502	0	0	5.1068	6.27143	0	0	1.09038	1.96641	1	0	43.2303	29.335	1	1	5.10609	5.41495	0	0	4.87906	3.4616	0	0	0.801927	0.718098	0	0	1.42264	2.10671	0	0	1.33854	1.20072	0	0	1.1277	0.972181	0	1
2/5/2019	1.17491	2.32409	0	0	4.86445	6.36905	1	1	2.14402	1.97339	0	0	32.0582	37.2798	0	1	5.45602	6.22023	0	0	2.73697	5.23196	1	0	0.785032	0.667256	0	0	1.46735	2.11818	0	0	1.26076	1.10631	1	0	0.945187	0.965022	0	1
3/5/2019	1.38154	2.68092	0	0	5.0813	7.0473	0	1	2.32988	1.6618	1	0	32.3342	36.3102	0	1	5.47004	5.89162	0	0	2.46943	5.14875	1	0	0.793551	0.662854	0	0	1.88874	2.55864	0	0	1.18548	0.847593	0	0	1.02484	0.97583	0	0
4/5/2019	1.19405	2.6965	0	0	4.36137	5.97909	0	0	2.91788	1.23385	1	0	36.5693	33.6631	0	0	5.49894	7.01663	0	0	2.87057	3.6594	2	0	0.774143	0.703065	0	0	1.61503	2.11751	0	0	1.12696	0.966733	0	0	1.06382	0.978116	0	1
5/5/2019	1.01167	1.83229	0	0	4.68363	6.1038	0	0	2.10079	1.31649	0	0	37.9571	30.8828	0	1	5.51337	6.14126	0	0	4.60594	4.86337	0	0	0.655026	0.708461	0	0	1.82953	1.87956	0	0	1.43627	0.895767	0	0	1.1879	0.898629	0	1
6/5/2019	1.29776	1.98755	0	0	4.92401	6.20989	0	0	1.9589	2.00486	1	0	30.3904	40.6769	0	0	4.84333	5.96869	0	0	3.90312	5.46407	0	0	0.709334	0.685599	0	0	1.8803	1.81664	0	0	1.40211	0.852394	0	0	1.1895	0.987343	0	1
7/5/2019	2.60383	1.79963	0	0	5.69511	6.40441	0	1	1.16245	2.04545	1	0	26.6661	37.3873	0	0	5.10493	5.78266	0	0	3.99429	5.91366	0	0	0.696294	0.840356	0	0	2.02048	2.03632	0	0	1.41364	1.09056	1	0	1.25536	1.01949	0	1
8/5/2019	1.1265	1.84727	0	0	5.37459	6.50172	0	0	1.69154	1.92479	1	0	27.9598	39.1704	0	0	5.36456	6.00303	0	0	5.76327	5.66478	0	0	0.699489	0.758323	0	0	1.75196	1.9453	0	0	1.42326	1.04202	0	0	1.19286	1.00652	0	1
9/5/2019	1.58704	1.71081	0	0	5.82195	4.81919	0	0	2.4023	0.955411	0	0	29.2262	29.7803	0	0	5.87564	5.86458	0	0	3.83082	5.23246	0	0	0.632223	0.759567	0	0	1.8782	1.78046	0	0	1.32722	0.906002	0	0	1.03407	0.915585	0	1
10/5/2019	1.6554	1.78944	0	0	6.22876	4.70026	0	0	2.42903	0.890008	0	0	32.8775	28.1284	0	0	5.70648	5.9744	0	0	3.6544	3.90033	0	0	0.673276	0.735972	0	0	1.77891	1.53197	0	0	1.08604	0.983328	0	0	1.01836	1.03555	0	0
11/5/2019	1.72738	1.80444	0	0	6.2731	5.77208	0	0	1.91636	1.02609	0	0	39.8653	37.3623	0	0	5.33515	5.4998	0	0	3.94481	3.94297	0	0	0.673529	0.720195	0	0	1.88149	1.48022	0	0	1.15188	0.877035	0	0	1.01831	1.24257	0	0
12/5/2019	1.97291	1.92838	0	0	6.17976	4.90989	0	0	2.25127	1.06748	0	0	38.3065	33.9079	0	0	5.07075	4.95927	0	0	3.86545	6.22476	0	0	0.710968	0.655463	0	0	1.67094	1.5838	0	0	1.01276	1.01114	0	0	0.898527	1.22471	0	0
13/5/2019	1.95155	1.42046	0	1	5.73219	5.84224	0	1	1.58827	0.899366	1	0	37.1272	35.5504	0	0	4.81686	4.77872	0	0	4.28623	6.14817	0	0	0.691366	0.798725	0	0	1.72577	1.6096	0	0	0.908067	1.1017	1	0	0.874336	1.06661	0	0
14/5/2019	1.88241	1.85424	0	0	5.65928	6.8674	0	0	1.48786	0.892307	2	1	36.0339	28.9934	0	0	4.82111	5.02153	0	0	3.77943	9.53985	1	0	0.775493	0.950099	0	0	1.70593	1.58854	0	0	1.23832	1.02825	0	0	0.823896	1.04989	0	0
15/5/2019	2.00896	2.04926	0	0	6.97957	6.12591	0	0	1.72848	0.98407	3	2	32.6477	26.8896	0	1	4.62924	5.29577	0	0	2.45695	8.2644	1	0	0.760766	0.935849	0	0	1.85409	1.75872	0	0	0.964971	0.870562	0	1	0.819317	1.07304	0	0
16/5/2019	1.92514	2.04897	0	0	6.09901	6.98619	0	0	1.28519	1.07771	2	0	30.7445	29.8237	0	1	4.60131	6.16812	0	0	2.72688	9.00462	2	0	0.763628	0.895868	0	0	2.4146	1.91646	0	0	1.29585	0.790088	0	0	0.983807	1.16398	0	0
17/5/2019	2.41326	1.68663	0	0	6.33448	6.31756	0	1	1.37836	1.884	2	1	29.6058	26.3702	0	2	4.31277	5.25144	0	0	2.51796	6.71918	2	0	0.760925	0.895969	0	0	2.27605	1.93145	0	0	1.24632	0.927225	0	0	1.01788	1.26514	0	0
18/5/2019	2.06539	1.42821	0	1	7.57863	5.76841	0	0	1.47443	2.16134	1	1	27.0636	29.6668	0	1	4.32626	5.10969	0	0	3.41026	6.89258	1	0	0.901259	0.831199	0	0	2.12212	1.94771	0	0	1.11659	0.97152	0	0	0.89622	1.26202	0	0
19/5/2019	1.61904	1.77694	0	0	7.15117	5.69115	0	0	1.50496	1.54488	3	0	27.0771	22.8775	1	1	4.40807	4.76641	0	0	3.18751	7.10464	2	0	0.833979	0.830573	0	0	1.88562	2.03953	0	0	1.16588	0.751967	0	0	0.927146	1.2882	0	0
20/5/2019	2.49091	1.76106	0	0	7.09934	3.66643	1	0	1.78915	1.16964	3	0	36.392	23.3868	1	1	4.2978	4.95821	0	0	4.097	7.12569	0	0	0.722144	0.884177	0	0	2.17177	1.97088	0	0	1.0583	0.946109	0	0	1.01377	1.31289	0	0
21/5/2019	1.89013	1.71472	0	0	8.07342	5.58744	0	0	2.24671	1.05962	2	0	28.4235	22.9761	0	1	3.87625	4.34132	0	0	7.86954	5.83056	1	0	0.726282	1.12627	0	0	2.11271	1.87622	0	0	0.904766	0.989066	0	0	1.01119	1.34356	0	0
22/5/2019	2.16614	1.90064	0	0	7.93679	3.45244	0	0	1.64239	0.88941	1	0	32.2514	24.1354	0	1	4.15211	4.17901	0	0	3.53461	3.9958	0	1	0.740984	1.12005	0	0	1.86107	2.09517	0	0	0.816416	0.971231	1	0	1.01395	1.25271	0	0
23/5/2019	1.76318	1.59287	0	0	7.65318	3.97416	0	0	1.51135	0.838218	0	0	31.2275	24.8412	0	1	4.02693	3.80509	0	0	3.60877	4.16124	0	0	0.939954	0.870389	0	0	1.932	1.81507	0	0	0.951507	0.716179	0	0	0.977622	0.988758	0	0
24/5/2019	1.66064	1.53357	0	0	6.29219	3.70252	0	0	1.42525	1.11325	1	0	25.0997	25.6056	1	0	4.38681	3.67627	0	1	2.8639	4.84981	0	0	0.781809	0.637766	0	0	2.00977	1.76701	0	0	1.31598	0.711168	1	1	1.01787	1.03492	0	0
25/5/2019	1.53734	2.2001	0	0	4.38753	3.30298	0	0	1.93036	0.914048	0	0	24.8222	26.3247	1	0	4.255	4.08518	0	0	3.44659	5.60476	0	0	0.499124	0.636627	0	0	1.96651	1.75107	0	0	0.851314	1.22283	1	1	0.995355	1.15037	0	0
26/5/2019	2.3504	1.92037	0	0	4.48289	3.91056	0	0	1.87547	0.840755	0	0	25.7888	30.4464	1	0	4.03528	4.27914	0	1	2.40028	4.95955	1	0	0.493195	0.472779	0	0	1.7369	1.62459	0	0	0.791561	1.06175	1	1	0.99507	1.05452	0	0
27/5/2019	1.70277	1.57225	0	0	5.07641	3.51004	0	0	1.60329	0.829015	0	0	22.7618	34.7648	1	0	3.88299	3.71442	0	1	3.15312	5.30748	0	0	0.482644	0.526044	0	0	1.54078	1.89999	0	0	0.766094	1.24291	1	1	0.945559	1.04761	0	0
28/5/2019	1.56038	1.59829	0	0	4.63606	2.81392	0	0	1.40133	1.10906	0	0	17.252	27.0466	1	0	5.07482	3.99558	0	1	3.55395	5.67739	0	0	0.477102	0.517476	0	0	1.54944	1.92347	0	0	0.949628	1.81192	1	0	0.918546	0.958572	0	0
29/5/2019	1.91371	1.53512	0	0	3.37776	4.45077	0	0	1.57024	1.31713	0	0	16.4175	26.5435	2	0	4.06248	4.41518	0	0	3.13084	5.1279	0	0	0.478234	0.510656	0	0	1.48443	1.99252	0	0	0.783443	1.64309	1	0	0.893623	1.05084	0	0
30/5/2019	1.61472	1.50735	0	0	3.49996	5.72626	0	0	1.43367	1.05489	1	0	14.669	23.7679	3	0	4.04932	3.53767	0	0	2.8147	5.91162	0	0	0.510032	0.795896	0	0	1.67367	1.60865	0	0	0.782183	1.01637	0	0	0.920716	1.04593	0	0
31/5/2019	1.75103	1.51381	0	0	4.48326	4.22691	0	0	1.53949	1.00905	0	0	16.0461	24.3675	1	0	4.47197	3.39601	0	0	3.00112	5.82902	0	0	0.499615	0.787107	0	0	1.86255	1.961	0	0	0.732041	1.06909	0	0	0.89594	1.04043	0	0
1/6/2019	2.2167	1.88978	0	0	3.44947	4.08605	0	1	1.54972	0.951611	0	0	14.9482	23.4186	2	0	4.40721	4.03645	0	0	3.44669	6.00203	0	0	0.42721	0.815183	0	0	1.7736	2.16255	0	0	0.81282	1.11473	0	1	0.921221	0.924379	0	0
2/6/2019	2.56105	1.54	0	0	3.36678	7.17561	0	1	1.56119	0.853959	0	0	17.3359	23.1785	0	0	3.98282	3.82671	0	0	3.31681	5.77734	0	0	0.511953	0.584067	0	0	1.52599	2.0611	0	0	0.959708	0.970061	0	1	0.942004	0.951963	0	0
3/6/2019	1.76948	1.24537	0	1	3.17998	6.87736	0	1	1.27457	0.920873	1	0	17.9379	21.7828	1	0	3.84304	3.71077	0	0	2.81112	4.64508	0	0	0.464889	0.584593	0	0	1.53428	2.06893	0	0	0.846456	0.988798	0	0	0.994811	0.958708	0	0
4/6/2019	1.9526	1.29895	0	1	3.36556	4.76104	0	1	0.853984	0.678775	1	1	15.664	22.653	1	0	4.53848	4.30952	0	0	2.6632	5.15867	1	0	0.478673	0.524807	0	0	1.83059	2.47669	0	0	0.747427	0.949456	0	1	0.874875	0.866229	0	0
5/6/2019	1.97082	2.73901	0	0	3.27208	4.48132	0	1	0.862745	2.68449	0	0	16.3756	32.8698	0	0	4.69143	4.00959	0	0	2.73233	4.4026	0	0	0.407939	0.526104	0	0	1.77743	2.2203	0	0	0.809702	0.774595	0	1	0.860204	0.892364	0	0
6/6/2019	1.39886	1.06767	0	0	3.05271	3.64126	0	2	0.970212	2.80275	0	0	18.3408	24.9779	0	0	4.18568	4.15765	0	0	3.52589	3.84029	0	0	0.457786	0.453194	0	0	1.69392	2.06428	0	0	0.789435	1.24063	0	1	0.849162	0.859747	0	0
7/6/2019	1.56866	1.4346	0	0	2.84767	2.6795	0	2	1.26456	2.76536	0	0	17.3128	23.681	0	0	3.82077	4.15551	0	0	2.97467	4.30488	0	0	0.453128	0.490233	0	0	1.66261	2.19221	0	0	0.81386	1.47473	0	0	0.839111	0.886281	0	0
8/6/2019	0.887505	1.38335	0	0	2.59143	2.54254	0	0	1.09958	1.06047	0	0	19.6041	26.2369	2	0	3.93161	3.85326	0	0	3.28958	4.78397	0	0	0.452023	0.497501	0	0	1.56873	2.21444	0	0	0.802687	1.01191	0	0	0.855393	0.895356	0	0
9/6/2019	1.08455	1.61466	0	0	2.18722	7.22985	1	0	1.08008	1.10064	0	0	16.6184	29.3535	2	0	3.36497	3.18083	0	0	3.3965	4.40867	0	0	0.450244	0.431693	0	0	1.58672	2.24491	0	0	0.84375	0.749609	0	1	0.892322	0.90517	0	0
10/6/2019	1.23878	1.39765	0	0	1.75534	4.9956	1	0	1.37479	0.993187	0	0	15.423	23.8173	1	0	3.35761	3.12251	0	0	3.2384	4.6563	0	0	0.44033	0.464722	0	0	1.60749	2.16044	0	0	0.757724	1.016	0	1	0.878374	0.914944	0	0
11/6/2019	1.42367	1.51327	0	0	1.94047	4.13675	1	0	1.36738	0.846657	0	1	15.8319	23.6011	0	0	3.60781	3.07466	0	0	3.04634	5.52293	0	0	0.36742	0.524183	0	0	1.59854	2.20771	0	0	0.688894	0.803172	0	1	0.869788	0.919513	0	0
12/6/2019	1.52726	1.08583	0	0	2.17771	3.89944	1	0	1.25808	1.096	0	0	15.4011	21.0581	0	0	3.48282	3.15808	0	0	3.05382	4.99991	1	0	0.360335	0.53779	0	0	1.53286	1.77357	0	0	0.719644	0.798622	0	1	0.863566	0.871508	0	0
13/6/2019	0.881343	0.940903	1	0	2.62623	3.9506	0	0	1.23391	1.10771	0	0	14.991	18.8252	0	0	3.35469	3.21269	0	0	2.75074	3.11068	1	0	0.32381	0.525096	0	0	1.73359	1.76673	0	0	0.852438	0.875957	0	1	0.826259	0.861688	0	0
14/6/2019	1.15688	1.00557	0	0	2.39186	3.48186	0	0	1.19627	1.10947	0	0	15.1508	19.4294	0	0	3.2306	3.24423	0	0	2.96288	2.81668	0	0	0.313359	0.537504	0	0	1.54511	1.75174	0	0	0.812658	0.981372	0	0	0.862694	0.856925	0	0
15/6/2019	1.16178	1.24713	0	0	2.43103	3.28439	1	0	1.17626	1.08657	0	0	26.1661	27.2492	0	0	2.6748	2.70419	0	0	2.65466	2.85155	1	1	0.234405	0.52973	0	0	1.33215	1.73274	0	0	0.701509	0.860336	0	0	0.932191	0.852956	0	0
16/6/2019	1.04786	1.29172	0	0	2.50073	4.10314	0	1	1.07034	1.42635	1	0	19.845	38.1292	0	0	2.40039	2.20585	0	0	2.95195	2.74593	1	1	0.236833	0.460283	0	0	1.36253	1.54197	0	0	0.661262	0.916912	0	0	0.877608	0.796177	0	0
17/6/2019	1.02325	1.22588	0	0	3.32932	3.746	0	1	1.85431	1.39678	1	0	19.5395	27.8171	0	0	2.21053	2.13345	0	0	3.19701	2.72125	0	1	0.201987	0.392637	0	0	1.43621	1.52208	0	0	0.675756	0.910482	0	0	0.886761	0.900088	0	0
18/6/2019	1.06401	1.19547	0	0	2.21092	3.93885	2	0	1.3243	1.31831	1	0	15.8039	27.3523	0	0	1.95135	2.35665	0	0	3.10018	2.6632	0	1	0.197097	0.316343	0	0	1.51142	1.47516	0	0	0.612751	0.877046	0	0	0.867451	0.81252	0	0
19/6/2019	1.00935	1.14358	0	0	2.50769	4.42692	1	0	1.68532	1.2822	0	0	14.57	26.998	0	0	2.18732	2.58341	0	0	2.50406	2.29025	0	1	0.256223	0.308221	0	0	1.56909	1.60785	0	0	0.635911	0.876986	0	0	0.755998	0.859155	0	0
20/6/2019	0.626379	1.06091	0	0	2.61256	4.03737	0	0	0.72952	1.15485	0	0	18.2726	25.1913	0	0	2.56726	2.40607	1	0	3.49085	2.38453	0	0	0.253891	0.345774	0	0	1.42109	1.50131	0	0	0.717531	0.84732	0	0	0.796708	0.828135	0	0
21/6/2019	0.717023	1.17081	0	0	2.89025	6.02558	0	0	0.824559	1.24873	0	0	12.0334	34.3781	0	0	1.89351	1.80705	0	0	3.02839	3.04129	0	0	0.233473	0.373519	0	0	1.35491	1.43103	0	0	0.78312	0.856624	0	0	0.841927	0.840478	0	0
22/6/2019	0.707789	1.31109	0	0	2.85961	5.42764	0	0	0.994302	1.29194	0	0	14.0759	27.457	0	0	1.86604	1.61395	0	0	3.31713	2.5011	0	0	0.224768	0.364698	0	0	1.27051	1.36375	0	0	0.71324	0.791454	0	0	0.852496	0.921485	0	0
23/6/2019	0.791095	1.05126	0	1	3.04003	4.65235	0	0	1.04145	1.16901	0	0	11.7598	33.8456	2	0	1.85588	1.29856	1	0	2.62031	2.61188	0	0	0.250412	0.287929	0	0	1.31425	1.51396	0	0	0.746422	0.726247	0	0	0.811866	0.825083	0	0
24/6/2019	0.855435	0.848801	0	0	2.40635	4.37621	0	1	0.996149	1.11842	0	0	12.2432	25.6596	3	0	1.94387	1.07602	1	0	2.59675	2.55193	0	0	0.242809	0.276577	0	0	1.15959	1.38218	0	0	0.571639	0.734689	0	0	0.787637	0.891581	0	0
25/6/2019	0.756256	0.795158	0	0	1.98099	4.78503	0	0	1.08041	1.2675	0	0	9.20061	24.0527	0	0	1.93747	1.01353	0	0	1.95235	2.56173	1	0	0.270808	0.239724	0	0	1.34233	1.37546	0	0	0.551676	0.655538	0	0	0.88705	0.876926	0	0
26/6/2019	0.739554	0.906991	0	0	1.46033	4.74798	0	1	0.66895	1.09942	0	0	9.66926	22.5944	0	0	1.70473	1.02041	0	0	2.37775	2.34916	0	0	0.295416	0.237956	0	0	1.39103	1.36073	0	0	0.780697	0.629236	0	0	0.846007	0.899511	0	0
27/6/2019	0.695519	0.953893	0	0	1.66936	5.44748	0	1	0.646728	0.858381	0	0	15.2501	8.0358	0	0	1.69589	1.20545	0	0	3.3395	2.61215	0	0	0.284294	0.271468	0	0	1.29881	1.15747	0	0	0.634321	0.506473	0	0	0.860301	0.88362	0	0
28/6/2019	0.726311	0.994623	0	0	1.75482	3.99616	0	1	0.647992	0.754342	0	0	10.8682	8.23969	0	0	1.19615	0.853228	0	1	3.20202	2.654	0	0	0.275495	0.269725	0	0	1.23767	0.950884	0	0	0.824903	0.567027	0	0	0.844221	0.823516	0	0
29/6/2019	0.701391	0.9528	1	1	1.93777	4.61202	0	0	0.622239	0.951061	1	0	14.87	7.61008	0	0	1.44961	1.37185	1	0	3.33836	2.37793	0	0	0.270182	0.294395	0	0	1.21045	1.07222	0	0	0.725149	0.63966	0	0	0.792495	0.835537	0	0
30/6/2019	0.722284	0.889577	0	0	1.96435	4.95358	0	0	0.633481	0.959505	0	0	15.2777	8.87793	0	0	1.32883	1.56065	0	1	3.13425	2.57183	0	0	0.262011	0.214619	0	0	1.26923	1.22946	0	0	0.753907	0.638677	0	0	0.699983	0.857161	0	0
1/7/2019	0.87845	0.831523	0	0	2.149	4.80844	0	0	0.654455	0.921985	0	0	15.5125	8.71542	0	0	1.20009	1.50197	1	0	2.69755	2.19345	1	0	0.182222	0.201395	0	0	1.26517	1.11361	0	0	0.541311	0.627957	0	0	0.781463	0.859042	0	0
2/7/2019	0.816338	0.711726	1	0	1.95723	3.18256	0	0	0.650948	1.04422	0	0	12.4203	12.05	0	0	1.05448	1.42624	2	0	3.67099	2.15925	0	0	0.174528	0.173835	0	0	1.23844	1.08492	0	1	0.67778	0.666269	0	0	0.813701	0.836765	0	0
3/7/2019	0.775113	0.679555	0	0	1.38877	3.4634	0	0	0.551518	0.936782	0	0	24.5843	13.2308	0	0	0.973009	1.24839	0	0	3.31267	1.78188	0	0	0.166521	0.195148	0	0	1.04476	1.07705	0	1	0.744126	0.733741	0	0	0.789483	0.819711	0	0
4/7/2019	1.12078	0.682664	0	0	1.53267	4.15316	0	0	0.429647	0.881328	1	0	22.9441	20.7739	0	0	0.758351	1.45459	1	1	3.09618	1.91601	0	0	0.156953	0.176711	0	0	0.963625	1.10038	0	0	0.739254	0.718534	0	0	0.824773	0.883031	0	0
5/7/2019	1.13966	0.584552	0	0	1.57747	3.40502	0	0	0.515494	0.771355	0	0	22.6972	19.1308	0	0	0.579619	0.99446	2	1	2.1972	1.95432	0	0	0.189677	0.165715	0	0	1.00406	1.07162	0	0	0.596616	0.7086	0	0	0.74906	0.924006	0	0
6/7/2019	1.01438	0.685607	0	0	1.92627	3.16908	0	0	0.350806	0.654907	1	0	21.8641	20.6192	0	0	0.486266	0.923552	2	0	2.08027	2.19224	0	0	0.183608	0.155272	0	0	1.00931	1.11087	0	0	0.587587	0.657556	0	0	0.718985	0.932828	0	0
7/7/2019	1.03445	0.797769	0	1	2.72354	3.0241	1	0	0.326313	0.582337	1	0	21.6824	15.117	0	0	0.525538	0.895515	0	1	1.55467	2.45169	0	0	0.180374	0.140394	0	0	0.999563	1.0564	0	0	0.841162	0.657991	0	0	0.786055	0.904505	0	0
8/7/2019	0.915347	0.481111	0	1	2.73284	1.70231	1	0	0.343754	0.623657	0	0	16.2298	16.0974	1	0	0.498106	0.826373	1	1	3.09484	2.28594	0	0	0.172437	0.131865	0	0	1.08089	1.04621	0	0	0.733048	0.696684	0	0	0.804734	0.89489	0	0
9/7/2019	0.952185	0.427839	0	3	2.85883	1.58517	0	0	0.333276	0.551039	0	0	16.6373	15.5675	0	0	0.546826	0.84081	1	1	3.07379	2.16686	0	0	0.168246	0.130287	0	0	1.03933	1.21897	0	0	0.701141	0.683542	0	0	0.865767	0.852716	0	0
10/7/2019	0.937368	0.529443	0	1	3.64429	1.55278	0	0	0.355336	0.59873	1	0	16.4684	21.8567	1	0	0.582218	0.843708	0	1	2.27248	1.94751	0	0	0.157054	0.130776	0	0	1.16403	1.31265	0	0	0.547519	0.663821	0	0	0.804978	0.775903	0	0
11/7/2019	0.796303	0.401268	0	0	3.82041	1.18434	1	3	0.316433	0.624134	1	0	19.005	14.5458	1	0	0.517212	0.727723	0	1	2.94734	1.97202	0	0	0.151061	0.11477	0	0	1.10471	1.35217	0	0	0.495906	0.733705	1	0	0.804476	0.772131	0	0
12/7/2019	0.913251	0.462392	0	1	3.58837	1.26073	1	0	0.355943	0.577403	1	0	26.905	16.6535	2	0	0.641651	0.798685	0	0	3.05572	1.83821	0	0	0.151982	0.0897323	0	0	1.01782	1.69771	0	0	0.511819	0.673361	0	0	0.866053	0.769918	0	0
13/7/2019	0.721941	0.639068	0	1	2.86011	1.42034	1	2	0.370819	0.560024	1	0	16.8355	23.1963	0	0	0.616959	0.736484	0	0	2.09536	1.65269	0	0	0.151361	0.0787679	0	0	1.22198	1.84204	0	0	0.512078	0.641129	0	0	0.865976	0.772939	0	0
14/7/2019	0.448977	0.435861	0	1	2.22869	1.42183	0	1	0.399978	0.593165	1	0	16.2009	17.7148	0	0	0.574532	0.776849	0	0	2.30807	1.68702	0	0	0.0787981	0.0722863	0	0	0.967096	2.0345	0	0	0.49113	0.734437	0	0	0.85822	0.814069	0	0
15/7/2019	0.415097	0.406321	1	0	1.27539	1.43331	0	1	0.417542	0.594172	1	0	15.2356	16.8459	1	0	0.560937	0.779436	0	0	2.79118	1.63536	0	0	0.0720868	0.0619025	0	0	1.11925	1.70406	0	0	0.445468	0.645311	0	0	0.764033	0.833942	0	0
16/7/2019	0.495271	0.514944	0	0	1.36116	2.42577	1	3	0.37284	0.593711	1	0	12.0758	16.6564	1	0	0.560445	1.06024	1	0	2.29106	2.08036	0	0	0.0632567	0.0560637	0	0	1.20089	1.54274	0	0	0.447817	0.63627	0	0	0.713762	0.871193	0	0
17/7/2019	0.453646	0.536461	0	0	1.07587	1.42034	1	2	0.322523	0.614678	1	0	12.6894	16.3832	1	0	0.364417	0.820441	0	0	1.90443	2.20062	1	0	0.0580705	0.0474898	0	0	1.44951	1.52704	0	0	0.470054	0.812663	0	0	0.712937	0.879499	0	0
18/7/2019	0.490947	0.51923	0	0	0.902119	1.38289	1	1	0.270372	0.584596	2	0	12.5147	16.066	1	0	0.39755	0.409962	0	1	2.41009	2.31862	0	0	0.0572742	0.0422518	0	0	1.07128	1.38221	0	0	0.469313	0.79572	0	0	0.738169	1.03126	0	0
19/7/2019	0.515967	0.521005	1	0	1.15428	1.10877	0	0	0.26983	0.578891	2	0	9.60021	16.6022	1	0	0.413577	0.488796	0	0	1.84825	2.88105	0	0	0.0938731	0.0404349	0	0	1.12046	1.32603	0	0	0.484569	0.769926	0	0	0.776394	1.0121	0	0
20/7/2019	0.510827	0.541679	1	0	1.16015	1.75586	1	0	0.249393	0.533975	0	0	9.0128	15.9108	1	0	0.322926	0.412706	1	1	2.54573	2.25608	0	0	0.0978576	0.0408679	0	0	1.37964	1.28338	0	0	0.457466	0.692249	0	0	0.771969	0.962816	0	0
21/7/2019	0.602973	0.566784	0	0	2.48823	1.4747	1	0	0.263515	0.393294	0	0	9.1061	16.5145	1	0	0.615881	0.431295	0	1	2.22081	2.33058	0	0	0.0974688	0.0373558	0	0	1.35542	1.29154	0	0	0.440886	0.791048	0	0	0.745376	0.841996	0	0
22/7/2019	0.50671	0.560515	1	0	2.9585	1.6252	0	0	0.369979	0.435226	0	0	6.86862	16.5655	2	0	0.622011	0.37135	0	1	2.38297	2.44961	0	0	0.0978984	0.0292928	0	0	1.15825	1.21186	0	0	0.411681	0.713825	0	0	0.79383	0.92193	0	0
23/7/2019	0.467203	0.501848	0	0	3.23049	2.15814	0	0	0.282609	0.410372	1	0	6.86057	30.8077	3	0	0.674933	0.459686	0	1	2.14895	2.46196	0	0	0.102258	0.0288665	0	0	0.960207	1.24008	0	0	0.414961	0.737961	0	0	0.776291	0.914874	0	0
24/7/2019	0.397031	0.571834	0	0	1.78439	1.6662	0	0	0.261336	0.402892	0	0	6.71471	32.2619	3	0	0.474205	0.434576	0	3	1.81758	2.33928	1	0	0.0915399	0.0284118	0	0	1.15815	1.24597	0	0	0.4899	0.859341	1	0	0.789861	0.913366	0	0
25/7/2019	0.351351	0.618686	0	0	2.45824	0.399936	0	2	0.291054	0.383072	0	0	10.2689	35.4807	2	0	0.484274	0.450453	1	2	2.18804	2.39329	0	0	0.0876721	0.0275583	0	0	0.927646	1.2499	0	0	0.570477	0.911677	0	0	0.932356	0.954654	0	0
26/7/2019	0.448465	0.757744	0	0	2.36989	0.251855	0	0	0.29133	0.370204	1	0	10.1942	32.6905	2	0	0.395943	0.448538	2	1	2.32726	2.12915	0	0	0.0821772	0.020669	0	0	0.851241	1.19106	0	0	0.515226	0.846593	0	0	0.97679	1.02403	0	0
27/7/2019	0.451124	0.489355	1	0	2.88638	0.785386	0	0	0.310759	0.328165	0	0	10.2131	27.1788	2	1	0.403921	0.457789	0	1	2.24257	2.09987	0	0	0.082156	0.0209781	0	0	0.885067	1.23506	0	0	0.536401	0.677815	0	0	0.927431	1.05198	0	0
28/7/2019	0.484691	0.477287	0	0	2.68073	0.783991	0	2	0.290876	0.388413	0	0	10.0856	11.2397	2	2	0.286896	0.446931	1	1	2.02893	2.23345	0	0	0.0795787	0.0188228	0	0	1.01807	1.25752	0	0	0.565416	0.656034	0	0	0.947185	1.06866	0	0
29/7/2019	0.548879	0.465977	0	0	3.08034	1.29732	0	1	0.752285	0.411608	0	0	8.16763	11.0579	1	2	0.519304	0.601685	1	0	2.07719	2.45919	0	0	0.0728541	0.0152693	0	0	1.05565	1.2278	0	0	0.568502	0.700433	0	0	0.905583	1.05752	0	0
30/7/2019	0.377403	0.464398	0	0	3.1838	1.41413	1	0	0.71692	0.360045	0	0	10.0737	11.067	0	3	0.678091	0.612191	1	0	2.02503	2.53675	0	0	0.0686357	0.0134785	0	0	1.15437	1.2401	0	0	0.562853	0.704118	0	0	0.913126	1.05499	0	0
31/7/2019	0.510748	0.510777	0	0	1.71673	0.938907	0	0	0.686816	0.36954	1	1	10.377	10.9474	0	4	0.663669	0.504857	1	0	2.35642	2.25981	0	0	0.0595702	0.0104248	0	0	1.11167	1.209	0	0	0.492823	0.71616	0	0	0.959406	1.10929	0	0
1/8/2019	0.458076	0.456089	0	0	1.41139	0.623083	0	0	0.684108	0.283419	1	1	10.189	7.47863	0	4	0.588241	0.375509	0	0	2.23716	2.39877	0	0	0.0534977	0.010551	0	0	1.14852	1.16744	0	0	0.53652	0.724874	0	0	0.958456	1.04454	0	0
2/8/2019	0.564189	0.48233	0	0	0.678142	0.61526	0	0	0.716625	0.28662	0	0	7.29339	8.36541	0	3	0.59998	0.376672	1	0	2.24853	2.35144	0	0	0.0503946	0.0116896	0	0	1.10625	1.13588	0	0	0.562754	0.680948	0	0	0.867086	0.983384	0	0
3/8/2019	0.537502	0.426162	0	0	0.946521	0.917149	0	1	0.277287	0.311637	0	0	6.45471	7.38697	1	3	0.607049	0.228753	1	0	2.2437	2.3945	0	0	0.0435187	0.0164258	0	0	1.26021	1.07386	0	0	0.616003	0.663665	0	0	0.898821	0.982962	0	0
4/8/2019	0.588157	0.429419	0	0	1.02374	0.844371	0	0	0.305998	0.295481	0	0	6.16463	10.2939	1	2	0.62022	0.285144	1	1	2.22437	2.46275	0	0	0.0445258	0.0209387	0	0	1.3001	1.03079	0	0	0.572936	0.685038	0	0	0.917242	1.01222	0	0
5/8/2019	0.421342	0.5055	0	0	1.5173	0.777576	0	0	0.325833	0.262579	0	0	5.78443	8.5162	2	2	0.52557	0.277606	1	1	2.25894	2.60482	0	0	0.0421542	0.021379	0	0	1.28421	1.03535	0	0	0.563714	0.676691	0	0	0.884199	1.00026	0	0
6/8/2019	0.41679	0.50476	0	0	1.52124	1.12978	0	0	0.193352	0.325362	1	1	6.80969	9.22269	1	1	0.535223	0.248763	1	1	2.20425	2.39218	0	0	0.0420563	0.0172909	0	0	1.08719	0.93374	0	0	0.536395	0.693685	0	0	0.954924	1.04769	0	0
7/8/2019	0.434536	0.471599	0	0	1.81651	1.3025	1	0	0.338972	0.199646	0	0	14.6658	8.32728	0	2	0.524364	0.262172	1	1	2.09159	2.24847	0	0	0.0370959	0.017029	0	0	1.07748	0.937455	0	0	0.522651	0.654468	0	0	1.02865	1.06392	0	0
8/8/2019	0.398087	0.407393	0	0	1.76991	1.2324	0	0	0.335228	0.209573	0	0	15.1611	8.31317	1	2	0.548267	0.285051	1	0	2.71488	2.22557	0	0	0.0342951	0.0133123	0	0	0.92956	0.94366	0	0	0.483352	0.58275	0	0	0.850697	1.08733	0	0
9/8/2019	0.53948	0.399907	0	0	1.86234	1.32014	0	0	0.260861	0.134732	0	1	17.2398	8.49958	1	1	0.441376	0.28951	0	0	2.66224	2.41193	0	0	0.0347341	0.0135801	0	0	1.00021	0.920905	1	0	0.516082	0.610066	0	0	0.821276	0.937621	0	0
10/8/2019	0.411409	0.372087	0	0	2.21271	1.19361	0	1	0.248518	0.15976	0	0	19.3837	6.77215	2	3	0.418262	0.266123	0	0	2.4535	2.35781	0	0	0.0355061	0.0159611	0	0	1.11161	1.02437	0	0	0.509772	0.620216	0	0	0.813499	0.868941	0	0
11/8/2019	0.328678	0.322428	0	0	2.12961	1.11647	0	0	0.242277	0.275799	0	0	18.9884	7.07013	2	2	0.420817	0.279508	0	1	2.31243	2.486	0	0	0.0320261	0.0127841	0	0	1.04203	1.10882	1	0	0.51225	0.783394	0	0	0.795532	0.796435	0	0
12/8/2019	0.327791	0.332258	0	0	2.00212	1.11594	1	0	0.20717	0.263355	0	0	18.7907	6.08498	2	1	0.435429	0.368716	0	1	2.29471	2.46017	0	0	0.0322462	0.0112546	0	0	0.994043	1.13507	1	0	0.525335	0.666365	0	0	0.801577	0.82594	0	0
13/8/2019	0.403639	0.365695	0	0	1.99244	1.04875	1	0	0.199475	0.225422	0	0	12.7408	8.68175	2	1	0.416851	0.36252	0	1	2.10285	2.65374	0	0	0.0304426	0.00990572	0	0	1.0765	1.24238	1	0	0.471643	0.660627	0	0	0.789285	0.847327	0	0
14/8/2019	0.421544	0.379433	0	0	0.975581	0.941216	1	0	0.214583	0.26274	0	0	13.3417	8.6089	2	1	0.384888	0.351595	0	1	2.3143	2.47717	0	0	0.0344505	0.00868278	0	0	0.988284	1.07574	1	0	0.455861	0.637071	1	0	0.890762	0.829462	0	0
15/8/2019	0.433976	0.35232	0	0	0.77058	0.900947	0	0	0.222179	0.277754	1	0	20.4398	8.87387	1	1	0.378216	0.346091	0	1	2.10076	2.43567	0	0	0.0395666	0.00737041	0	0	0.998004	1.08748	2	0	0.454015	0.540483	1	0	0.864419	0.757715	0	0
16/8/2019	0.405223	0.343029	0	0	2.09494	0.501157	1	0	0.39145	0.281826	1	0	20.3481	8.48918	3	0	0.390358	0.356399	0	1	2.0352	2.08425	0	0	0.0406831	0.0110474	0	0	1.01002	0.994074	2	0	0.468839	0.602909	0	0	0.947562	0.886269	0	0
17/8/2019	0.358369	0.21342	0	0	1.50157	0.504027	1	0	0.408204	0.157513	0	1	20.4188	9.80989	2	0	0.361513	0.373894	0	0	1.69479	2.15412	0	0	0.0322581	0.0144042	0	0	1.087	0.979494	1	0	0.582842	0.62006	0	0	0.901154	0.896055	0	0
18/8/2019	0.477843	0.209002	0	0	1.6552	0.487629	0	0	0.215994	0.141208	0	1	28.688	10.587	2	0	0.349008	0.469864	0	0	1.92778	2.59138	0	0	0.0302106	0.0244204	0	0	1.04993	1.12262	0	0	0.576579	0.615534	0	0	0.686317	0.946748	0	0
19/8/2019	0.529024	0.263643	0	0	1.40503	0.420844	1	0	0.216501	0.177323	0	1	15.186	9.5819	2	0	0.353401	0.497959	0	0	2.46793	2.50653	0	0	0.0235585	0.024758	0	0	1.05027	1.27	0	0	0.679043	0.764989	0	0	0.81745	0.667425	0	0
20/8/2019	0.529094	0.286835	0	0	1.39249	0.444451	0	0	0.228275	0.178061	0	0	14.8348	9.06876	3	0	0.358208	0.370887	0	0	2.44352	2.67764	0	0	0.0186725	0.0318724	0	0	1.07276	1.29831	0	0	0.672383	0.739651	0	0	0.710111	0.669537	0	0
21/8/2019	0.499342	0.291802	0	0	0.626778	0.500161	0	1	0.226268	0.16848	0	0	17.5866	9.66474	2	0	0.342993	0.462289	0	0	2.61776	2.84456	0	0	0.0175301	0.0283693	0	0	1.16307	1.2514	0	0	0.624337	0.55747	0	0	0.685422	0.795372	0	0
22/8/2019	0.460708	0.217765	0	0	0.66614	0.739085	0	1	0.203897	0.117735	0	0	16.3555	9.94021	2	0	0.327929	0.479462	0	0	2.61422	3.11252	0	0	0.0168052	0.0254599	0	0	1.20863	1.23491	0	0	0.783545	0.54251	0	0	0.729057	0.778543	0	0
23/8/2019	0.492554	0.218007	0	0	0.268312	0.741523	0	1	0.1726	0.137942	0	0	16.1239	9.02754	2	0	0.427213	0.468754	0	0	2.57199	2.78099	0	0	0.018487	0.0270225	0	0	1.10253	1.22638	0	0	0.57302	0.556185	0	0	0.663792	0.797431	0	0
24/8/2019	0.575983	0.278019	0	0	0.23888	0.303092	0	1	0.255953	0.160873	0	0	10.3702	8.03631	1	0	0.329843	0.474669	0	0	2.62366	2.62505	0	0	0.0175768	0.0276866	0	0	1.03323	1.07248	0	0	0.574048	0.518473	0	0	0.807934	0.790448	0	0
25/8/2019	0.409846	0.233311	1	0	1.6766	0.398061	0	0	0.425156	0.194089	0	0	10.8566	7.31979	1	0	0.326698	0.469364	0	0	2.20347	2.32643	0	0	0.0169732	0.0290775	0	0	1.22628	0.962509	0	0	0.563882	0.531482	0	0	0.864266	0.767764	0	0
26/8/2019	0.481915	0.21045	0	0	1.65625	0.304742	0	0	0.432771	0.13078	0	0	7.83653	8.10651	2	0	0.323106	0.391196	0	0	2.1778	2.25489	0	0	0.0160893	0.0251082	0	0	1.26462	1.12239	0	0	0.578296	0.590439	0	0	0.813089	0.768952	0	1
27/8/2019	0.452095	0.17858	1	0	1.73303	0.314565	0	0	0.248361	0.137264	0	0	13.6234	9.7161	1	0	0.322697	0.382482	0	0	2.29348	2.27878	0	0	0.0135329	0.0288967	0	0	1.34595	1.02421	0	0	0.620051	0.543831	0	0	0.854568	0.670652	0	1
28/8/2019	0.441821	0.181439	1	0	1.71985	0.276126	0	1	0.258056	0.141278	0	0	10.811	10.5129	1	0	0.313083	0.369488	0	0	2.22379	2.37454	0	0	0.0122537	0.0328367	0	0	1.41678	0.986398	0	0	0.644332	0.549224	0	0	0.839848	0.82479	0	0
29/8/2019	0.442823	0.189635	0	0	1.8081	0.344801	0	1	0.276024	0.141287	0	0	6.72771	10.1799	2	0	0.225997	0.376602	0	0	2.384	2.28683	0	0	0.00991717	0.0326742	0	0	1.31373	0.994363	0	0	0.671623	0.559956	0	0	0.856879	0.83176	0	0
30/8/2019	0.42336	0.186918	0	0	1.95519	0.370868	0	1	0.186956	0.146064	0	0	12.0593	10.6457	0	0	0.219464	0.311506	0	0	2.5193	2.31524	0	0	0.0106794	0.0433193	0	0	1.26776	1.06729	0	0	0.657315	0.710319	0	0	0.862432	0.823477	0	0
31/8/2019	0.487806	0.172802	0	0	2.00399	0.28521	0	0	0.202992	0.133779	0	0	13.6911	9.10239	0	0	0.207941	0.326425	0	0	2.42735	1.93312	0	0	0.011377	0.0484633	0	0	1.27715	1.12741	0	0	0.688274	0.68533	0	0	0.860889	0.842713	0	0
1/9/2019	0.437181	0.185005	0	1	1.56268	0.229276	0	0	0.220849	0.13764	0	0	12.88	6.61192	0	1	0.21354	0.325214	0	0	2.37821	1.95721	0	0	0.0129237	0.0535113	0	0	1.2114	0.887172	0	0	0.678636	0.678513	0	0	0.858801	0.831151	0	0
2/9/2019	0.412308	0.210688	0	0	1.62759	0.206162	0	0	0.189976	0.136491	1	0	12.4377	3.15089	1	1	0.22766	0.31666	0	0	2.34525	1.95178	0	0	0.0174426	0.0570733	0	0	1.35049	0.929839	0	0	0.661201	0.70131	0	0	0.849832	0.819376	0	0
3/9/2019	0.349775	0.239392	0	1	1.61852	0.371864	0	0	0.234842	0.148837	0	0	11.6635	4.05324	1	1	0.229613	0.256624	0	0	2.47218	1.99604	0	0	0.0162152	0.0662274	0	0	1.3084	1.39448	0	0	0.922147	0.721025	0	0	0.85415	0.774532	0	0
4/9/2019	0.395976	0.281377	0	0	1.60495	0.0948901	0	1	0.215654	0.135605	0	0	11.6768	7.35212	1	0	0.30364	0.252131	0	0	2.35012	1.74106	0	0	0.0181286	0.0732815	0	0	1.39001	1.24909	0	0	0.927109	0.819228	0	0	0.721993	0.761387	0	0
5/9/2019	0.367452	0.249311	0	0	1.64944	0.148902	0	2	0.213945	0.161522	0	0	11.9969	6.24798	1	0	0.227061	0.270263	0	0	2.32085	1.62506	0	0	0.0242478	0.0809052	0	0	1.32388	1.1782	0	0	0.775581	0.789494	0	0	0.766815	0.780842	0	0
6/9/2019	0.408673	0.223057	0	0	1.63222	0.194317	0	2	0.197961	0.186769	0	0	12.2884	4.69913	1	1	0.292131	0.265779	0	0	2.05449	1.92076	0	0	0.0244228	0.0927581	0	0	1.20207	1.10438	1	0	0.848258	0.808193	0	0	0.810153	0.775605	0	0
7/9/2019	0.237549	0.239124	0	0	1.63017	0.194176	0	2	0.191442	0.191084	0	0	12.2516	5.61976	0	0	0.309172	0.259576	0	0	2.09684	1.93024	0	0	0.0246804	0.106797	0	0	1.25109	0.928487	1	0	0.860483	0.663782	0	0	0.781197	0.799729	0	0
8/9/2019	0.328641	0.277666	0	0	1.60909	0.272039	0	1	0.176662	0.14385	0	0	8.11838	8.96526	0	0	0.28796	0.279737	1	0	2.28941	1.99703	0	0	0.0280097	0.115342	0	0	1.10652	1.04612	1	0	0.934639	0.705978	0	0	0.791228	0.860149	0	0
9/9/2019	0.337852	0.29008	0	0	1.69187	0.26239	0	1	0.167598	0.121696	0	1	7.83568	5.11914	0	0	0.281009	0.306425	1	0	2.08176	2.28501	0	0	0.0275727	0.117124	0	0	1.19293	1.06931	0	0	0.756639	0.744836	0	0	0.812482	0.866552	0	0
10/9/2019	0.331551	0.309909	0	0	1.62025	0.354657	0	1	0.163019	0.158983	0	1	9.43653	4.75839	0	1	0.16905	0.296625	0	0	1.84901	2.23683	0	0	0.0362189	0.114962	0	0	1.04535	1.08391	1	0	0.746065	0.780641	0	0	0.778136	0.859308	0	0
11/9/2019	0.249275	0.312203	1	0	1.65413	0.191663	0	1	0.18385	0.119532	0	0	9.15384	6.27077	0	0	0.304157	0.285716	0	0	1.92848	2.3818	0	0	0.039837	0.115075	0	0	1.44003	1.07247	0	0	0.70347	0.670515	0	0	0.779265	0.846997	0	0
12/9/2019	0.219323	0.299042	1	0	1.71636	0.208545	2	1	0.19518	0.116768	0	0	7.48812	4.23864	1	0	0.305669	0.263667	1	0	1.92849	2.25319	0	0	0.0421687	0.115303	0	0	1.44067	1.09484	0	0	0.672613	0.628588	0	0	0.809929	0.857181	0	0
13/9/2019	0.197193	0.298658	1	0	1.89594	0.24072	0	1	0.210741	0.115309	0	0	8.04212	8.4279	2	1	0.299618	0.263387	0	0	1.97425	2.18785	0	0	0.0462933	0.121001	0	0	1.26387	1.17273	0	0	0.609005	0.67636	0	0	0.859125	0.932572	0	0
14/9/2019	0.19209	0.288499	1	0	1.92917	0.204554	0	1	0.219002	0.120286	0	0	8.0386	6.30882	1	0	0.314946	0.26024	0	0	1.81015	2.18379	0	0	0.0524519	0.12646	0	0	1.29313	1.13235	0	0	0.708237	0.596407	0	0	0.850107	0.972424	0	0
15/9/2019	0.206524	0.297117	2	0	1.69768	0.189518	0	1	0.218999	0.114852	0	0	9.02859	6.14858	1	0	0.331677	0.244719	0	0	1.97291	2.24523	0	0	0.0568832	0.127725	0	0	1.15577	1.21317	0	0	0.701688	0.602481	0	0	0.817441	0.932536	0	0
16/9/2019	0.294747	0.293297	2	0	1.65152	0.349565	0	1	0.221102	0.121633	0	0	6.5	4.88094	1	0	0.330973	0.259509	0	0	2.16316	2.0964	0	0	0.0594209	0.129857	0	0	1.25116	1.08442	0	0	0.768369	0.534555	0	0	0.80267	0.939918	0	0
17/9/2019	0.196707	0.262525	1	0	1.69222	0.500573	0	1	0.205485	0.114821	0	0	9.89876	6.64768	1	1	0.194094	0.256772	0	0	2.17052	2.09792	0	0	0.0626882	0.127324	0	0	1.30259	1.14666	0	0	0.809173	0.498817	0	0	0.75169	0.93243	0	0
18/9/2019	0.237241	0.243644	0	0	1.67891	1.15106	0	1	0.221316	0.105373	1	0	13.6672	6.87387	1	0	0.202109	0.267844	0	0	1.78873	2.3846	0	0	0.0748363	0.133482	0	0	1.45349	1.13514	0	0	0.799332	0.56627	0	0	0.765207	0.957894	0	0
19/9/2019	0.22969	0.274648	0	0	1.54496	1.05791	1	1	0.258656	0.141852	0	0	22.3323	6.41646	0	0	0.206257	0.248012	0	0	1.61446	2.33844	0	0	0.0752234	0.142184	0	0	1.32678	1.12094	0	0	0.813014	0.54183	0	0	0.848225	0.885759	0	0
20/9/2019	0.243932	0.297896	0	0	1.79955	0.951264	0	0	0.244804	0.0916024	0	0	19.3831	8.44198	0	0	0.33963	0.233541	0	0	1.96376	2.31906	0	0	0.0919357	0.160565	0	0	1.23823	1.09737	0	0	0.771818	0.583987	0	0	0.8344	0.86573	0	0
21/9/2019	0.286987	0.315877	0	0	1.29142	0.959584	0	0	0.211816	0.132462	1	0	18.3589	7.62644	0	0	0.362457	0.229668	0	0	2.01775	2.11401	0	0	0.0596516	0.16773	0	0	1.17919	1.21824	0	0	0.730248	0.633684	0	0	0.885229	0.919212	0	0
22/9/2019	0.274856	0.355137	0	0	1.33937	0.236334	0	0	0.227285	0.125946	1	0	12.8356	8.2659	0	0	0.383811	0.231435	0	0	2.1728	2.42704	0	0	0.0711424	0.174479	0	0	1.14171	1.22819	0	0	0.686835	0.651528	0	0	0.861313	0.920939	0	0
23/9/2019	0.405793	0.287337	0	0	1.27539	0.165419	0	0	0.253544	0.135245	1	0	15.0752	9.40043	1	0	0.383741	0.216884	0	0	2.43348	2.27249	0	0	0.0747423	0.187479	0	0	1.04792	1.20808	0	0	0.522753	0.723511	0	0	0.907689	0.885199	0	0
24/9/2019	0.457673	0.310339	2	0	1.18971	0.441989	0	0	0.302748	0.133834	1	0	17.0303	12.3759	0	1	0.268245	0.222404	0	0	2.43442	2.14104	0	0	0.0884038	0.184135	0	0	0.983901	1.31149	0	0	0.567796	0.579656	0	0	0.893155	0.872575	0	0
25/9/2019	0.48071	0.275584	1	0	1.63601	0.469459	0	0	0.41621	0.143381	1	0	15.5944	7.52742	1	1	0.288432	0.209571	0	0	2.61959	2.06299	0	0	0.0937667	0.193269	0	0	1.55209	1.29682	0	0	0.599182	0.720958	0	0	0.900823	0.88771	0	0
26/9/2019	0.38367	0.294897	1	0	2.8222	0.426349	0	0	0.498107	0.104767	0	0	13.1341	8.83878	0	0	0.278644	0.229908	1	0	2.50782	1.89583	0	0	0.106405	0.19739	0	0	1.61262	1.34536	0	0	0.640122	0.633445	0	0	0.874717	0.881973	0	0
27/9/2019	0.89936	0.36605	0	0	2.80369	0.336207	0	0	0.36681	0.164171	0	0	14.3869	8.35721	2	0	0.303185	0.232374	1	0	2.49787	2.14827	0	0	0.123716	0.21654	0	0	1.00152	1.33807	0	0	0.634973	0.588565	0	0	0.832984	0.860674	0	0
28/9/2019	0.269762	0.509846	0	0	2.02047	0.243479	0	1	0.309227	0.14073	0	0	12.8332	20.0228	1	0	0.303687	0.232961	0	0	2.94701	1.81679	0	0	0.131002	0.221755	0	0	1.57897	1.34393	0	0	0.602557	0.591921	0	0	0.833238	0.853939	0	0
29/9/2019	0.296528	0.334045	0	0	1.72725	0.231765	0	1	0.238164	0.145418	0	0	15.3816	9.67506	2	0	0.316173	0.230645	1	0	2.51272	1.84662	0	0	0.142526	0.236234	0	0	1.59625	1.27263	0	0	0.634071	0.59165	0	0	0.761996	0.848926	0	0
30/9/2019	0.440026	0.326164	0	1	1.55829	0.191061	0	0	0.27289	0.135057	1	0	14.5575	5.96802	2	1	0.363574	0.227288	0	0	2.56777	1.83778	0	0	0.158006	0.24209	0	0	1.48335	1.26471	0	0	0.639817	0.874064	0	0	0.744991	0.967533	0	0
1/10/2019	0.456298	0.348549	0	1	1.52359	0.188903	0	1	0.27103	0.0911846	0	0	17.8139	9.63642	3	1	0.329812	0.212276	0	0	2.38238	2.05709	1	0	0.175252	0.25834	0	0	1.23216	1.22781	0	0	0.709779	0.746997	0	0	0.789413	0.964683	0	0
2/10/2019	0.366174	0.372287	0	0	1.3668	0.366626	0	0	0.26843	0.182738	0	0	12.6199	10.649	1	1	0.362195	0.234284	1	0	2.01009	1.92845	0	0	0.256607	0.269808	0	0	1.09422	1.2182	0	0	0.739201	0.889478	0	0	0.894794	0.944974	0	0
3/10/2019	0.394755	0.334234	0	0	0.402097	0.253241	0	1	0.232167	0.125314	0	1	12.7972	15.9771	1	1	0.6311	0.329321	0	0	2.09071	1.8057	0	0	0.273213	0.27976	0	0	1.10131	1.22731	1	0	0.720811	0.719865	0	0	0.899325	0.909929	0	0
4/10/2019	0.393593	0.379619	0	0	1.2287	0.388665	0	1	0.147257	0.120448	1	1	12.41	17.4345	2	0	0.394842	0.271961	0	1	2.17256	1.8809	0	0	0.289942	0.282857	0	0	1.17114	1.24964	0	0	0.71608	0.588606	0	0	0.956081	0.829285	0	0
5/10/2019	0.306183	0.41365	0	0	1.38789	0.346175	0	1	0.154331	0.129391	1	1	16.3541	19.0607	1	0	0.373665	0.271876	0	0	2.16676	1.77626	0	0	0.308417	0.29198	0	0	1.36381	1.17225	0	0	0.788892	0.614803	0	0	1.0017	0.877772	0	0
6/10/2019	0.560301	0.385843	1	0	1.03617	0.296105	0	2	0.236546	0.13079	0	1	23.9311	8.59976	0	1	0.374513	0.278154	0	0	2.2655	1.80682	0	0	0.320212	0.300063	0	0	1.33691	1.2126	0	0	0.777666	0.654742	0	0	1.04292	0.889234	0	0
7/10/2019	0.365437	0.370535	0	0	0.912629	0.490976	0	1	0.223596	0.142601	0	1	20.5276	13.1326	0	0	0.35879	0.288199	0	0	2.78232	2.00273	0	0	0.252623	0.308338	0	0	1.4931	1.16009	0	0	0.620873	0.689509	0	0	0.973023	0.928825	0	0
8/10/2019	0.211301	0.330701	1	0	0.985707	0.288145	0	2	0.207774	0.136984	1	1	22.4287	13.5468	1	0	0.582336	0.310404	0	1	2.86891	2.20396	0	0	0.259992	0.330321	0	0	1.53243	1.50954	0	0	0.579976	0.819634	0	0	0.924097	0.946519	0	0
9/10/2019	0.323836	0.357212	1	0	1.621	0.431033	0	0	0.257362	0.122427	0	0	27.9272	13.3002	2	0	0.34415	0.307496	0	0	2.75839	2.45901	0	0	0.274527	0.208934	0	0	1.61496	1.53363	0	0	0.652321	0.843005	0	0	1.04576	0.964221	0	0
10/10/2019	1.60138	0.427892	1	1	1.33368	0.202539	0	1	0.338247	0.127303	0	1	38.9978	29.1542	2	0	0.3442	0.319661	0	1	3.27239	2.32445	0	0	0.289764	0.259401	0	0	1.58911	1.40086	0	0	0.660981	0.636557	0	1	1.03703	0.95756	0	0
11/10/2019	0.761014	0.473381	0	1	1.20089	0.360069	0	0	0.377412	0.179937	0	0	37.0054	27.9978	1	0	0.42007	0.330711	0	0	3.52625	2.08577	0	0	0.26782	0.227583	0	0	1.44787	1.14534	0	0	0.596063	0.658885	0	0	1.03806	0.95889	0	0
12/10/2019	0.452769	0.384963	0	0	1.53041	0.316452	0	1	0.4255	0.162589	0	1	26.7677	26.7796	1	0	0.405496	0.332565	0	0	3.73888	2.24137	0	0	0.231333	0.191856	0	0	1.6579	1.09875	0	0	0.59162	0.858475	0	0	0.908039	0.963636	0	0
13/10/2019	0.485034	0.459771	0	0	1.5058	0.886886	1	0	0.552773	0.20404	0	0	27.0616	46.1584	1	0	0.456601	0.33473	0	0	3.37296	4.82315	0	0	0.192678	0.265328	0	0	1.51619	1.23299	0	0	0.658125	0.688325	0	1	0.928947	0.982192	0	0
14/10/2019	0.649776	0.55384	0	0	2.9684	0.93438	0	0	0.385019	0.202602	0	0	47.1683	26.8017	2	0	0.734489	0.407204	0	0	3.59881	5.43033	0	0	0.294416	0.270687	0	0	1.54592	1.07183	0	0	0.710685	0.617547	0	1	0.980574	0.96456	0	0
15/10/2019	0.557713	0.580056	0	0	3.10204	1.20008	0	0	0.478045	0.206834	0	1	40.734	31.4665	1	0	0.502019	0.464335	1	0	4.29191	5.68706	0	0	0.300123	0.262743	0	0	1.55585	1.19331	0	0	0.722862	0.708933	0	0	0.985067	0.991437	0	0
16/10/2019	0.360724	0.538954	0	0	1.90184	1.65355	0	0	0.507103	0.218978	0	1	24.5424	39.9418	3	0	0.503786	0.393626	0	0	3.83448	5.43181	0	0	0.265261	0.26075	0	1	1.53186	1.22625	0	0	0.712461	0.971408	1	0	1.03109	0.992291	0	0
17/10/2019	0.604075	0.936667	0	0	1.92057	2.27044	0	0	0.459931	0.18586	0	2	24.1575	30.2412	1	0	0.477071	0.394399	0	0	3.44991	5.58372	0	0	0.399128	0.261257	0	1	1.42917	1.36094	0	0	0.699938	0.798033	0	1	1.02266	1.01579	0	0
18/10/2019	0.378308	0.66436	0	1	1.94103	2.40715	0	0	0.476632	0.189758	0	2	25.0673	28.2527	1	0	0.592887	0.331023	0	0	3.40754	3.38119	0	0	0.395407	0.329415	0	1	1.24836	1.53522	0	0	0.865909	0.633555	0	0	1.02828	0.992291	0	0
19/10/2019	0.447012	0.698703	0	0	2.19516	2.46581	0	0	0.491486	0.176494	0	2	33.9408	30.3158	1	0	0.639579	0.444395	0	0	3.07543	3.6592	0	0	0.390508	0.331616	0	1	1.3221	1.47216	0	0	0.885979	0.721577	0	1	1.03321	0.988046	0	0
20/10/2019	0.364904	0.804277	0	0	2.38453	2.09776	0	0	0.503514	0.209366	0	0	34.9119	24.6231	1	1	0.511379	0.44599	0	0	3.47668	3.38655	0	0	0.347875	0.27999	0	1	1.285	1.50077	1	0	0.749741	0.859087	0	0	1.03703	0.95782	0	0
21/10/2019	0.381298	0.563897	0	0	2.71486	1.7419	1	0	0.482331	0.267557	0	0	42.3922	29.7193	0	0	0.359597	0.360743	1	0	3.56884	3.8148	0	0	0.351335	0.350978	0	1	1.35239	1.70283	1	0	0.839698	1.10571	0	1	1.06197	0.950825	0	0
22/10/2019	0.410307	1.1615	1	0	3.41325	2.22862	0	0	0.639285	0.297996	0	0	50.9278	26.2994	0	2	0.455841	0.365901	1	0	3.35707	3.97063	0	0	0.34936	0.314324	0	1	1.56025	1.94486	0	0	0.935932	1.10465	0	1	1.0447	0.943555	0	0
23/10/2019	0.458132	0.579588	0	0	4.60405	2.82657	1	0	0.727863	0.289386	0	1	39.2888	21.9965	1	3	0.456208	0.552082	0	0	4.95047	3.91601	1	0	0.33685	0.314268	0	1	1.43392	1.87263	1	0	1.04933	1.31492	0	1	1.03231	0.944672	0	0
24/10/2019	0.4508	0.418025	0	0	4.60834	2.28837	1	0	0.835741	0.474666	0	0	40.5216	21.5712	1	2	0.499061	0.626106	0	0	4.81399	4.82137	1	0	0.456185	0.381133	0	1	1.31865	1.7215	0	0	0.956307	1.39521	0	1	1.00214	0.938655	0	0
25/10/2019	0.449242	0.381252	0	0	5.34208	2.25276	1	0	0.561614	0.355432	0	0	30.5991	18.2624	1	0	0.794499	0.485681	0	0	5.39165	4.16512	1	0	0.455358	0.376857	0	1	1.8869	1.6489	0	0	0.929347	1.58499	0	1	0.983822	0.912773	0	0
26/10/2019	0.349674	0.737755	0	0	5.13742	2.47967	2	0	0.880094	0.344035	0	0	41.3134	20.1592	1	0	0.903763	0.496072	0	0	4.22484	5.14642	1	0	0.46336	0.445035	0	1	1.829	1.62311	0	0	1.33063	1.72045	0	0	1.10894	0.947491	0	0
27/10/2019	0.356555	0.716349	0	0	3.23901	2.3917	1	0	0.769845	0.330611	0	0	29.8232	22.3694	2	0	0.491173	0.421835	0	0	3.79578	6.72929	1	0	0.458041	0.437221	0	1	1.86539	1.56607	0	0	0.782421	1.94416	0	0	1.06198	1.00466	0	0
28/10/2019	0.336939	0.789681	1	0	3.24222	2.00712	1	0	0.662508	0.36087	0	0	31.884	23.8865	0	1	0.489926	0.441994	0	0	4.27077	13.0395	1	0	0.519307	0.51902	0	1	1.5124	1.42475	1	0	0.754177	1.87156	1	0	1.04039	1.0312	0	0
29/10/2019	0.3689	0.805742	0	0	3.30008	2.01854	2	0	0.666931	0.369407	0	0	29.5014	53.445	1	1	0.487538	0.568292	0	0	4.34419	11.4206	0	0	0.517335	0.51497	0	0	1.60054	1.61706	0	0	0.900995	1.33448	0	0	0.996721	1.06372	0	0
30/10/2019	0.410688	0.942114	0	0	3.21431	2.56384	1	1	0.732831	0.792501	0	0	30.1484	66.2303	0	0	0.511818	0.595916	0	0	5.53499	11.4413	0	0	0.504837	0.518561	0	0	2.03998	1.9334	0	0	0.879008	1.25942	0	0	1.12677	1.24477	0	0
31/10/2019	0.656451	0.845578	0	0	3.37896	2.55889	2	1	0.717942	0.735081	0	0	29.6091	55.0264	1	0	0.487903	0.417998	1	1	6.33684	10.4285	0	0	0.497681	0.521731	0	1	2.01066	1.79966	0	0	0.754052	1.22004	0	0	1.14442	1.04006	0	0
1/11/2019	0.367892	1.60557	0	0	3.71112	2.20558	1	1	0.842589	0.779694	0	0	47.8133	64.264	1	0	0.502537	0.391698	0	0	5.03301	4.19112	1	0	0.498787	0.533219	0	1	1.92297	1.78788	0	0	1.04613	1.16619	0	0	1.06392	1.06667	0	0
2/11/2019	0.451154	1.31235	2	0	3.61299	3.08672	1	0	0.850779	0.390842	0	1	45.6201	42.5826	0	0	0.670836	0.382103	0	1	3.75107	3.86575	0	0	0.466475	0.47205	0	1	2.22874	1.79908	0	0	0.75845	1.26852	0	0	1.34051	1.15797	0	0
3/11/2019	1.15862	1.58644	1	0	3.47432	2.99774	1	0	0.492645	0.396004	0	1	49.1661	35.9712	0	0	0.696382	0.386182	0	1	11.2134	5.51103	0	0	0.456825	0.439469	0	2	2.42581	1.89307	0	0	1.00888	1.05864	0	0	1.55206	1.17706	0	0
4/11/2019	2.08732	1.28222	1	0	3.63064	3.37402	1	0	0.549071	0.381831	0	1	50.5484	31.7822	0	1	0.728925	0.392486	0	0	4.14936	5.34988	0	0	0.44458	0.473097	0	1	2.0959	2.24606	0	0	1.14579	1.01447	0	0	1.49626	1.17726	0	0
5/11/2019	1.92902	1.33414	1	0	3.4123	3.3331	1	0	0.543951	0.358693	0	1	61.8929	50.14	0	1	0.953639	0.446223	0	0	5.17957	4.64924	1	0	0.452845	0.542986	1	1	2.00285	2.11911	0	0	1.14936	1.04704	0	0	1.22542	1.18133	0	0
6/11/2019	1.66939	1.80434	1	0	3.86999	3.2157	0	0	0.573471	0.36684	0	1	39.181	52.6832	0	1	0.911644	0.550832	0	0	5.536	5.44484	0	0	0.455369	0.560155	1	1	2.18819	2.03562	0	0	1.10274	1.40916	0	0	1.28777	1.21733	0	0
7/11/2019	1.60798	2.55715	1	0	4.62871	3.59771	0	0	1.0678	0.446797	0	1	38.067	48.1185	0	1	0.955157	0.563481	0	0	5.42025	5.27049	0	0	0.529719	0.550364	0	1	3.32412	2.18104	0	0	1.03624	1.31977	0	0	1.29156	1.28954	0	0
8/11/2019	1.62201	1.29724	1	1	4.38283	4.47719	0	1	1.09363	0.488795	0	1	65.5341	40.5056	1	1	1.33889	0.60367	0	1	5.4887	5.07275	0	0	0.519436	0.601284	0	0	2.99987	1.9629	0	0	1.19077	2.45937	0	0	1.27982	1.34745	0	0
9/11/2019	1.76822	0.993492	1	0	4.98554	4.11851	0	0	1.31723	1.26903	0	0	50.1157	38.5596	0	1	1.20558	0.488047	0	1	8.64335	4.62968	0	0	0.520554	0.526426	0	0	2.89524	2.28039	0	0	1.03561	1.08846	0	0	1.27494	1.33945	0	0
10/11/2019	0.901283	1.24868	0	0	4.03122	4.33227	0	0	1.23597	1.31713	0	0	44.7831	43.9528	0	1	1.17788	0.418909	0	0	18.7045	4.63769	0	0	0.518731	0.5158	0	0	2.83539	2.53926	0	0	1.01873	1.35656	0	0	1.2736	1.30423	0	0
11/11/2019	1.77653	1.32929	0	2	4.33809	4.52852	0	0	0.823393	1.34414	0	1	64.3323	36.8111	0	1	1.11764	0.518074	0	0	17.6976	7.16118	1	0	0.52455	0.511679	0	0	3.90651	2.47248	0	0	1.54169	1.22562	0	0	1.29665	1.25236	0	0
12/11/2019	2.63341	1.59706	0	0	4.79032	4.66259	0	0	0.731632	1.25958	0	1	85.7953	39.5529	0	1	1.30022	0.534997	0	0	18.304	5.90181	0	0	0.48805	0.555777	0	0	1.8148	2.03677	0	0	1.10143	0.872402	0	0	1.29746	1.20967	0	0
13/11/2019	1.52928	1.46492	0	0	5.80121	4.69131	0	0	1.32261	1.01938	0	0	51.8818	32.3846	1	1	1.2911	0.585425	0	0	9.92163	6.00253	1	0	0.647481	0.525573	1	0	1.70039	2.06746	0	0	1.39583	0.876685	0	0	1.15804	1.09088	0	0
14/11/2019	1.20355	1.62023	0	0	5.65746	4.4943	0	0	1.33743	1.16795	0	0	54.2029	18.9781	0	1	1.40954	0.540964	0	0	3.84154	4.87945	1	0	0.453659	0.542665	1	0	1.73444	1.53142	0	0	1.48511	0.832882	0	0	1.31322	1.11615	0	0
15/11/2019	1.00712	1.36397	0	0	7.07984	4.47451	0	0	1.63868	1.18364	0	0	61.0621	19.8388	0	1	1.303	0.793161	0	0	6.33021	4.08881	0	0	0.622275	0.585519	1	0	1.47597	1.49372	0	0	1.59336	0.857903	0	0	1.27338	1.21659	0	0
16/11/2019	2.65617	3.22801	0	0	8.0192	5.38181	1	0	1.79069	1.11126	0	0	64.7064	31.0672	0	3	0.87371	0.729619	0	0	13.9531	3.76564	0	0	0.666809	0.571655	0	0	1.6127	1.30856	0	0	1.46754	0.843652	0	0	1.12022	1.19722	0	0
17/11/2019	2.49335	2.06924	0	0	7.3504	6.44119	0	0	1.77474	1.0215	1	0	58.1582	20.9151	0	2	0.99216	0.807391	0	0	3.94274	3.54453	0	0	0.662474	0.576327	0	0	1.6009	1.58335	0	0	1.66611	0.809529	0	0	1.19934	1.05377	0	0
18/11/2019	2.44756	1.39323	0	0	7.4346	6.28112	0	0	1.39957	0.699765	0	1	82.0622	19.2054	0	1	1.29202	0.825327	0	0	4.48717	3.53724	0	1	0.816889	0.569591	0	0	1.81549	1.75421	0	0	1.73568	0.911361	0	0	0.732918	1.02834	0	0
19/11/2019	3.86972	1.14624	0	0	7.49773	5.58467	0	0	1.51332	0.671216	0	1	73.9422	31.6713	0	1	1.42294	0.825045	0	0	5.02118	2.8973	0	0	0.799092	0.501454	0	0	1.59898	1.76829	0	0	1.37588	0.901743	0	0	0.731425	1.05771	0	0
20/11/2019	2.32289	1.2623	0	0	7.65843	6.32379	0	0	1.93165	0.689029	0	1	60.6604	30.246	0	0	1.50148	1.39298	0	0	5.30733	2.61751	0	1	0.854833	0.455022	0	0	1.72861	1.79545	0	0	1.36943	1.10334	1	0	0.787274	1.08008	0	0
21/11/2019	0.946631	1.57155	0	0	6.79456	5.91151	0	0	1.4734	0.688129	0	0	40.2222	36.4718	0	1	1.61233	0.970242	0	0	4.22139	2.16243	0	1	0.837173	0.454028	0	0	1.66076	1.82217	0	0	1.27142	1.10416	1	0	0.951557	1.06832	0	0
22/11/2019	7.75598	1.11789	0	0	5.60433	5.19964	1	0	1.79632	0.667949	0	0	40.4004	32.9631	0	0	1.02974	0.955773	0	0	4.56735	8.57763	0	0	0.831528	0.435915	0	0	1.66428	1.96205	0	0	1.58526	1.019	0	0	0.944942	1.03325	0	0
23/11/2019	1.25032	0.981347	0	0	4.14354	5.03509	0	0	1.45669	1.22555	1	0	31.9712	66.2119	0	1	1.19776	1.17023	0	0	3.74625	3.51903	0	0	0.586419	0.444042	0	0	1.71593	1.64799	0	0	1.70423	0.949347	0	0	0.924666	1.07232	0	0
24/11/2019	1.26362	1.36641	1	0	4.47136	6.34254	0	0	0.946841	1.16717	1	0	36.6367	70.2483	0	0	1.71844	1.13864	0	0	4.78022	3.74517	0	0	0.587078	0.472699	0	0	1.68265	1.80357	0	0	1.31445	0.705826	0	0	0.987215	0.989178	0	0
25/11/2019	1.8878	1.1684	0	1	4.11781	6.68314	1	0	0.903643	1.26894	1	0	52.2159	68.9548	1	2	2.0721	1.19412	0	0	5.02809	3.13571	0	0	0.601202	0.509289	0	0	2.20981	2.06147	0	0	1.3049	0.537197	0	0	0.987133	1.01257	0	0
26/11/2019	1.03052	1.2812	0	1	5.36845	6.69096	0	0	0.629257	1.3873	1	0	31.2905	66.7216	1	1	2.38317	1.18414	0	0	5.97661	8.1665	1	0	0.673023	0.531989	0	0	2.1295	1.84861	0	0	1.01364	0.866594	0	1	1.00208	1.27249	0	0
27/11/2019	1.37519	0.761637	0	1	5.9811	6.45518	0	0	0.690392	1.56968	0	0	39.1542	66.2058	2	1	2.38844	1.17677	0	0	6.51216	9.60207	1	0	0.670018	0.53432	0	0	2.05831	2.201	0	0	1.00504	0.940352	0	0	0.982203	1.35182	0	0
28/11/2019	1.75103	0.804642	0	1	7.57685	7.85233	0	0	0.593725	1.79511	1	0	37.5871	73.9996	1	1	2.60005	1.31134	0	0	5.47235	3.77086	1	0	0.686837	0.552376	0	0	1.9702	1.77349	0	0	1.41194	0.758875	0	0	0.98766	1.35493	0	0
29/11/2019	1.20239	0.626865	0	1	7.66743	8.01324	0	0	0.696638	2.15644	1	0	36.5251	73.4078	1	2	3.00966	1.14843	0	0	5.91864	2.25441	0	0	0.691985	0.586275	0	0	2.45078	1.43058	0	0	1.33065	0.706081	0	0	1.04443	1.13663	0	0
30/11/2019	5.29943	1.38064	0	1	7.64797	7.35634	0	0	0.941404	1.95016	2	0	43.4231	70.4597	1	2	2.93739	1.1325	0	0	6.01731	2.08318	0	1	0.689155	0.582311	0	0	2.46121	1.50092	0	0	1.13541	0.776356	0	0	1.03761	1.20918	0	0
1/12/2019	2.07209	1.1785	0	2	9.81985	7.70061	0	0	1.24689	1.60243	0	0	38.8104	66.0349	1	1	2.11658	1.85645	0	0	5.62025	3.50856	0	0	0.680069	0.645937	0	0	2.38879	1.21445	0	0	1.37326	1.00963	0	0	1.03576	1.27503	0	0
2/12/2019	2.14475	0.632804	0	1	8.8306	7.73377	0	0	1.22807	1.57855	0	0	34.9487	65.8287	0	1	1.73526	1.99732	0	0	8.54948	4.23493	0	0	0.855148	0.643811	0	0	1.69642	1.46497	0	0	1.22041	0.870057	0	0	0.890701	1.267	0	0
3/12/2019	3.19263	1.25267	0	2	8.50053	7.573	0	0	1.65298	1.22744	0	0	43.1118	75.681	0	0	2.02635	1.45773	0	0	9.63879	4.77954	0	0	0.857502	0.661111	0	0	1.80249	1.35869	0	0	1.53466	0.89327	0	0	0.933647	1.28324	0	0
4/12/2019	3.17161	0.664257	0	1	9.20944	7.66984	0	0	2.09521	0.995219	0	0	35.3713	72.8611	0	0	2.47663	1.80945	0	0	6.83763	4.75287	0	1	0.837967	0.659704	0	0	1.71996	2.42378	0	0	1.21265	1.0509	0	0	0.984683	1.29595	0	0
5/12/2019	2.13237	1.70836	0	0	9.08851	7.18067	0	0	3.07137	0.968809	1	0	46.7277	79.7592	0	0	3.09481	1.91441	0	0	6.19175	4.48336	0	1	0.892652	0.642743	0	0	1.39242	1.46388	0	0	1.07974	0.844317	0	0	1.08482	1.2091	0	0
6/12/2019	0.995629	1.44849	0	1	8.20781	6.89877	0	0	3.06025	1.56593	1	0	41.1044	45.1995	0	0	2.61472	2.13007	0	0	7.05606	3.60857	0	1	0.781726	0.626783	0	0	1.39704	2.52228	1	0	1.27875	0.985136	0	0	1.03022	1.11207	0	0
7/12/2019	1.01063	1.68129	0	1	9.62086	6.68785	0	0	3.63942	1.69776	1	0	36.9205	45.3517	1	0	2.51854	2.41019	0	0	7.34286	3.79595	0	0	0.777675	0.670629	0	0	1.13911	1.54211	0	0	1.34301	1.01616	0	0	1.06019	1.15685	0	0
8/12/2019	1.02484	0.786742	0	1	8.5298	7.06642	0	0	3.82471	2.77002	0	0	36.6314	46.8304	2	0	2.77951	2.05933	0	0	7.83778	3.41609	0	0	0.772486	0.72063	0	0	1.53343	1.48385	2	0	1.58034	1.13071	0	0	1.05573	1.20466	0	0
9/12/2019	1.27278	0.597276	0	1	8.40977	4.61173	0	0	3.95666	3.66402	1	0	36.1336	41.7909	1	0	2.30134	2.29729	0	0	7.99284	3.89929	0	0	0.778223	0.705209	0	0	1.54115	1.61624	1	0	1.42723	1.43262	0	0	1.09657	1.29947	0	0
10/12/2019	1.3018	1.54263	0	1	8.1261	7.37694	0	0	4.81161	2.97937	0	0	37.4466	59.7859	2	0	2.27577	2.4373	0	0	7.36302	4.51304	0	0	0.779542	0.713869	0	0	1.53453	1.49651	1	0	1.06443	1.3283	1	0	1.09248	1.26784	0	0
11/12/2019	4.14406	1.09265	0	0	8.00355	9.30872	0	0	2.55864	3.54992	0	0	59.2701	49.0208	1	0	2.12819	2.69535	0	0	7.9403	7.08512	0	0	0.770451	0.714241	0	0	1.50364	1.5544	1	0	1.31018	1.30642	1	0	0.898938	1.42958	0	0
12/12/2019	1.32501	0.81416	0	0	7.68644	9.40336	0	0	1.64503	3.99119	0	0	39.4065	47.5859	2	0	2.48739	2.49356	0	0	7.10379	7.02707	0	0	0.773721	0.715466	0	0	1.50404	1.56658	0	0	1.37462	1.25871	0	0	0.973802	1.33014	0	0
13/12/2019	1.48471	1.49836	0	0	5.26376	8.5908	1	0	1.58094	3.6928	0	0	43.0979	35.411	2	0	2.40521	2.46903	0	0	10.2249	8.16592	0	0	0.769184	0.726305	0	0	1.64818	1.46089	0	0	1.48	1.30537	0	0	0.872494	1.34572	1	0
14/12/2019	1.14346	0.844463	0	0	6.96187	8.10184	1	0	1.1783	3.27187	0	0	36.8073	34.8246	2	0	2.46235	2.2321	0	0	8.0297	7.73503	0	0	0.756413	0.71659	0	0	1.95473	1.49333	1	0	1.34755	1.43151	0	0	0.877809	1.33534	1	0
15/12/2019	1.38595	0.982725	1	0	6.57862	9.80338	1	0	1.69947	3.4627	0	1	46.9663	35.1793	0	0	2.23144	1.97293	0	0	8.63236	8.98826	0	0	0.760783	0.716653	0	0	1.76674	1.46409	0	0	1.40353	1.44272	0	0	0.886304	1.36567	1	0
16/12/2019	1.45586	1.07057	0	0	6.54489	6.21441	1	0	1.53703	3.57545	1	0	47.3268	45.6855	0	0	2.41655	2.22752	0	0	8.77749	9.35518	0	0	0.760259	0.717398	0	0	1.69028	1.48886	0	0	1.45857	1.48719	0	0	0.994119	1.25566	0	0
17/12/2019	1.24352	1.5059	0	0	6.56163	6.29428	0	0	4.10947	3.88371	0	0	38.3356	33.9145	1	0	2.52372	2.23681	0	0	11.4403	8.22406	0	0	0.760509	0.772612	0	0	1.54584	1.45139	1	0	1.51684	1.58719	0	0	1.05871	1.1986	0	0
18/12/2019	1.43395	1.11234	0	0	5.2722	9.6217	0	0	0.730033	4.15474	0	0	31.7982	31.2002	1	1	2.96539	2.6187	0	0	12.8183	7.4219	0	0	0.811505	0.780739	0	0	1.73084	1.65375	1	0	1.0604	1.28572	0	0	1.08581	1.21827	0	0
19/12/2019	1.05974	1.01813	1	0	7.08651	9.40326	0	0	1.08032	2.81749	1	0	33.789	33.4596	2	0	3.66935	2.54548	0	0	11.8006	7.09454	0	0	0.818881	0.794442	0	0	1.55176	1.61601	0	0	1.32647	1.1914	0	0	1.0741	1.2019	0	0
20/12/2019	2.32979	0.925348	1	0	4.94505	11.9326	0	0	2.30268	2.52997	0	0	20.7476	41.5329	2	0	3.95928	2.58817	0	0	14.7202	6.61548	0	0	0.806959	0.786173	0	0	1.90853	1.58983	0	0	1.27097	1.55735	0	0	1.11799	1.31198	0	0
21/12/2019	1.55827	0.941901	0	0	6.50911	11.1745	0	0	2.54747	2.46733	1	0	21.8165	42.1258	2	0	3.95817	2.66842	0	0	14.1701	7.27996	0	0	0.812812	0.775996	0	0	1.91048	1.63271	0	0	1.16398	1.3996	0	0	1.07965	1.543	0	0
22/12/2019	1.37118	1.01224	0	0	5.31742	11.2983	0	0	4.44006	3.9313	0	0	24.5331	39.5139	2	0	3.58615	2.39714	0	0	15.965	5.60137	0	0	0.812808	0.705592	0	0	1.74837	1.61142	0	0	1.09311	1.62533	0	0	1.09546	1.61394	0	0
23/12/2019	1.33748	1.08199	0	0	6.40447	9.25625	0	1	4.76931	4.40814	0	0	24.8002	50.2934	1	0	4.19097	2.81631	0	0	17.1146	5.87363	0	0	0.818453	0.70943	0	0	1.84848	1.6905	0	0	0.841843	1.77144	0	0	1.12548	1.44205	0	0
24/12/2019	1.2871	2.35253	0	0	10.2831	5.96331	0	0	5.16102	4.07347	0	1	29.0794	38.0988	1	1	3.86463	2.60742	0	0	20.6131	5.25721	0	0	0.806306	0.703833	0	0	1.83399	1.36429	0	0	1.03123	1.51205	0	0	1.10589	1.30912	0	0
25/12/2019	1.29202	1.36741	0	0	10.9224	7.66636	0	0	4.79657	3.27201	0	0	28.9704	40.4321	1	0	3.7761	2.79388	0	0	13.2873	4.63153	0	0	0.834567	0.691209	0	0	1.74407	1.29331	0	0	0.842359	1.44389	1	0	1.07506	1.38291	0	0
26/12/2019	1.387	1.19802	0	0	7.99201	6.06411	0	0	5.47809	3.205	0	2	34.4265	33.3933	1	0	3.28394	2.57678	0	0	18.6223	3.65608	0	1	0.832243	0.690439	0	0	2.08172	1.19289	0	0	0.785635	1.3592	1	0	1.01506	1.31501	0	0
27/12/2019	2.21693	1.2952	0	0	9.4287	6.00206	0	0	5.59224	3.53104	0	1	31.8487	34.8136	1	0	3.54655	2.89321	0	0	16.2105	4.98924	0	0	0.828573	0.69614	0	0	2.20607	1.24508	0	0	0.810982	1.02383	0	0	1.1315	1.23258	0	0
28/12/2019	2.25762	1.51899	0	0	9.57812	5.69331	0	0	5.40559	2.90603	0	1	26.6908	36.8083	1	0	4.05014	3.10773	0	0	16.8793	5.31363	0	0	0.830141	0.698073	0	0	2.12569	1.37102	0	0	0.998966	0.866307	1	0	1.09551	1.23683	0	0
29/12/2019	9.21712	1.29531	0	0	9.09924	7.20215	0	0	5.09924	2.70123	0	1	28.06	23.6557	1	0	4.20592	3.34271	0	0	14.7404	6.72916	0	1	0.84033	0.700199	0	0	2.1047	1.46652	0	0	1.07872	0.935443	1	0	1.14528	1.19295	0	0
30/12/2019	1.70181	1.45102	0	0	8.33039	6.91861	0	0	4.70916	3.11105	0	1	24.104	12.625	1	0	4.02721	3.11833	0	0	8.21615	6.36131	1	0	0.828094	0.707564	0	0	2.08859	1.44428	0	0	1.30704	0.900589	1	0	1.09632	1.12609	0	0
31/12/2019	1.54462	1.32163	0	0	9.15201	5.62912	0	1	4.43767	3.41963	0	1	19.6832	12.0604	0	1	3.69559	3.19093	0	0	9.05942	3.3868	1	0	0.825961	0.706688	0	0	2.07951	1.45007	0	0	1.11825	0.89495	0	0	1.04993	1.13157	0	0
1/1/2020	7.11873	1.6364	1	0	10.6341	6.30723	0	0	4.68119	2.86027	0	0	21.749	22.3822	1	0	4.15921	3.20812	0	0	6.01672	4.18006	0	0	0.820267	0.697051	0	0	1.75891	1.1134	0	0	1.19391	0.941497	0	0	1.02643	1.11153	0	0
2/1/2020	7.58497	1.67673	0	0	8.97255	5.32974	0	0	2.53181	3.20241	0	0	42.7395	27.9287	0	0	4.48091	3.81508	0	0	8.48366	4.53643	0	0	0.82635	0.757948	0	0	1.79359	1.00166	0	0	1.16511	0.935248	0	0	1.06504	1.12092	0	0
3/1/2020	1.78168	1.9126	0	0	8.08836	5.25669	0	0	2.73392	3.36642	0	0	17.0045	26.6955	2	0	4.74811	3.55971	0	0	6.61235	4.99102	0	0	0.833822	0.758576	0	0	1.91204	1.04563	0	1	1.15243	0.910637	0	0	1.15085	1.10584	0	0
4/1/2020	1.72133	1.36247	0	0	5.33702	6.61787	0	0	2.7514	3.45066	0	0	18.6389	17.7835	2	0	4.5266	3.76834	0	0	6.98107	5.84661	1	1	0.837862	0.757086	0	0	2.18332	1.13806	0	1	1.51269	1.00394	0	0	1.07967	1.33374	0	0
5/1/2020	1.70007	2.22291	0	0	5.88681	7.93192	0	0	3.26037	3.57739	0	0	24.232	18.357	0	0	4.50734	3.74022	0	0	15.4719	4.15569	1	1	0.844179	0.759055	0	0	2.13598	1.06761	0	1	1.42532	0.94443	0	0	1.14789	1.10752	0	0
6/1/2020	2.40764	2.10377	0	0	10.7043	4.3236	0	0	3.93498	3.71456	0	0	34.0102	20.9536	0	0	4.12389	3.48412	0	0	16.3453	5.83251	1	0	0.846009	0.759778	0	0	2.37047	1.09882	0	1	1.47448	0.891019	0	0	1.08503	1.22218	0	0
7/1/2020	2.89775	1.52813	0	0	11.4638	6.10398	0	0	4.29331	3.62703	0	0	28.5091	21.5992	0	0	4.35188	3.76867	0	0	14.0388	9.49785	1	0	0.860229	0.676688	0	0	2.35171	1.15332	0	0	1.20467	0.914094	0	0	1.08678	1.13033	0	0
8/1/2020	1.89949	2.23366	0	0	10.3702	4.59218	0	0	3.19214	4.13268	0	0	22.3718	25.3987	2	0	4.6896	3.7952	0	0	14.8863	14.3553	0	0	0.868364	0.733957	0	0	2.68396	1.34529	0	0	1.23072	0.811067	0	0	1.10898	1.12828	0	0
9/1/2020	1.90791	1.31845	0	0	13.6681	5.32657	1	0	3.14716	4.09032	0	0	28.0465	20.2502	1	0	4.57142	3.98822	0	0	8.4218	7.6621	0	0	0.832019	0.741769	0	0	2.19067	1.3223	0	0	1.27531	0.909199	0	0	1.08097	1.07256	0	0
10/1/2020	1.76473	1.32351	0	0	10.7018	5.97093	0	0	3.57136	3.54458	0	0	20.0867	18.8303	2	0	4.51499	4.32693	0	0	6.54201	7.77624	0	0	0.84224	0.806515	0	0	2.69339	1.22673	0	0	1.25068	0.892911	0	0	1.11792	1.09283	0	0
11/1/2020	2.44118	2.00388	0	0	10.869	4.94335	0	0	5.54354	2.90236	0	0	29.1185	20.6445	2	1	4.52496	3.96088	0	0	6.46037	10.6482	0	0	0.892624	0.761478	0	0	2.20519	1.20679	0	1	1.30143	0.875866	0	0	1.08842	1.05847	0	0
12/1/2020	1.97632	1.27729	0	0	11.1525	5.05202	0	0	5.54131	2.00372	0	1	20.5858	17.7947	2	1	4.32908	3.7167	0	0	7.39603	6.96172	0	1	0.900122	0.83515	0	0	2.21167	1.47008	0	0	1.24354	0.895014	0	0	1.00339	1.11416	0	0
13/1/2020	1.82513	2.73228	0	0	9.74971	5.69627	0	0	5.08045	2.45913	0	1	20.1892	19.2462	2	1	4.28228	3.83712	0	0	6.82943	12.1111	0	0	0.901	0.855677	0	0	2.10493	1.43892	0	0	1.23338	1.08888	1	0	1.03198	1.16429	0	0
14/1/2020	1.61301	2.906	0	0	6.33095	5.75647	0	0	4.42715	2.46766	0	1	19.4672	17.6845	3	0	4.5356	4.26123	0	0	9.47177	8.34389	0	0	0.884886	0.860227	0	0	2.14571	1.52659	0	0	1.22207	1.73873	1	0	0.929654	1.13453	0	0
[truncated: 29,206 more rows]
